# Supplementary material for: Ewing Sarcoma-Derived Extracellular Vesicles Impair Dendritic Cell Maturation and Function
Source: Cells. 2021 Aug 13;10(8):2081. doi: 10.3390/cells10082081 (PMC8391167; doi:10.3390/cells10082081)
Supplement: Supplementary file 1 [file cells-10-02081-s001.zip › Supplementary Table 1_CD14_expression.hg38.xlsx]

## Sheet: cuffdiff.TC32
test_id	gene_id	gene	locus	sample_1	sample_2	status	value_1	value_2	log2(fold_change)	test_stat	p_value	q_value	significant
ENSG00000000419	ENSG00000000419	DPM1	chr20:50888915-50958555	Control	TC32	OK	20.1196	22.7774	0.178996	0.161016	0.85995	0.998796	no
ENSG00000000457	ENSG00000000457	SCYL3	chr1:169662006-169894267	Control	TC32	OK	4.04408	4.05199	0.00281963	0.00458102	0.99625	0.999049	no
ENSG00000000460	ENSG00000000460	C1orf112	chr1:169662006-169894267	Control	TC32	OK	2.95461	4.00748	0.439728	0.421299	0.6041	0.998796	no
ENSG00000000938	ENSG00000000938	FGR	chr1:27612063-27635277	Control	TC32	OK	517.963	436.468	-0.246975	-0.645214	0.4421	0.998796	no
ENSG00000001036	ENSG00000001036	FUCA2	chr6:143450806-143511690	Control	TC32	OK	33.8675	38.3303	0.17858	0.46754	0.57375	0.998796	no
ENSG00000001084	ENSG00000001084	GCLC	chr6:53497340-53617171	Control	TC32	OK	67.5826	70.1101	0.0529706	0.102692	0.8977	0.998796	no
ENSG00000001167	ENSG00000001167	NFYA	chr6:41026910-41099976	Control	TC32	OK	15.0749	11.5921	-0.379001	-0.813774	0.3302	0.998796	no
ENSG00000001461	ENSG00000001461	NIPAL3	chr1:24307555-24472976	Control	TC32	OK	4.89439	4.2518	-0.203054	-0.351437	0.6554	0.998796	no
ENSG00000001497	ENSG00000001497	LAS1L	chrX:65512581-65534775	Control	TC32	OK	10.887	9.83502	-0.146601	-0.222139	0.7493	0.998796	no
ENSG00000001629	ENSG00000001629	ANKIB1	chr7:92246233-92401384	Control	TC32	OK	31.2854	28.9173	-0.113559	-0.188567	0.82	0.998796	no
ENSG00000001630	ENSG00000001630	CYP51A1	chr7:92112150-92180725	Control	TC32	OK	36.8663	41.2681	0.162724	0.460399	0.5449	0.998796	no
ENSG00000001631	ENSG00000001631	KRIT1	chr7:92198968-92246166	Control	TC32	OK	26.219	26.7211	0.0273649	0.0459728	0.95845	0.998796	no
ENSG00000002016	ENSG00000002016	RAD52	chr12:912076-1495933	Control	TC32	OK	13.3888	8.90249	-0.588745	-0.393682	0.56685	0.998796	no
ENSG00000002330	ENSG00000002330	BAD	chr11:64269829-64289500	Control	TC32	OK	13.4947	8.22066	-0.715069	-0.657683	0.3858	0.998796	no
ENSG00000002549	ENSG00000002549	LAP3	chr4:17577191-17614571	Control	TC32	OK	44.9149	44.1267	-0.0255428	-0.0581529	0.9485	0.998796	no
ENSG00000002586	ENSG00000002586	CD99	chrX:2691132-2741309	Control	TC32	OK	87.5554	75.313	-0.217298	-0.567274	0.4965	0.998796	no
ENSG00000002822	ENSG00000002822	MAD1L1	chr7:1815792-2233243	Control	TC32	OK	52.9582	39.0444	-0.43974	-0.839062	0.3132	0.998796	no
ENSG00000002834	ENSG00000002834	LASP1	chr17:38869858-38921770	Control	TC32	OK	203.915	177.786	-0.197825	-0.556319	0.47535	0.998796	no
ENSG00000002919	ENSG00000002919	SNX11	chr17:48103356-48123074	Control	TC32	OK	17.9823	14.7384	-0.286993	-0.442622	0.57745	0.998796	no
ENSG00000002933	ENSG00000002933	TMEM176A	chr7:150791284-150805120	Control	TC32	OK	2.30661	3.48985	0.597391	0.655294	0.4637	0.998796	no
ENSG00000003056	ENSG00000003056	M6PR	chr12:8681599-8949955	Control	TC32	OK	496.253	435.577	-0.188146	-0.40971	0.62135	0.998796	no
ENSG00000003147	ENSG00000003147	ICA1	chr7:8113183-8344516	Control	TC32	OK	1.46708	3.72945	1.34602	0.806222	0.2059	0.998796	no
ENSG00000003393	ENSG00000003393	ALS2	chr2:201700553-201781189	Control	TC32	OK	11.1441	9.02136	-0.304863	-0.469321	0.52595	0.998796	no
ENSG00000003400	ENSG00000003400	CASP10	chr2:201182880-201229406	Control	TC32	OK	20.8358	16.3284	-0.351674	-0.496171	0.5364	0.998796	no
ENSG00000003402	ENSG00000003402	CFLAR	chr2:201116103-201176687	Control	TC32	OK	155.324	245.312	0.659334	1.0445	0.23835	0.998796	no
ENSG00000003436	ENSG00000003436	TFPI	chr2:187001875-187565760	Control	TC32	OK	3.87634	8.84826	1.1907	1.02153	0.1609	0.998796	no
ENSG00000003509	ENSG00000003509	NDUFAF7	chr2:37167819-37324808	Control	TC32	OK	13.5898	15.6117	0.200108	0.139092	0.86465	0.998796	no
ENSG00000003756	ENSG00000003756	RBM5	chr3:49940006-50189075	Control	TC32	OK	116.351	102.928	-0.176841	-0.256165	0.7655	0.998796	no
ENSG00000004059	ENSG00000004059	ARF5	chr7:127580617-127602144	Control	TC32	OK	56.449	42.8644	-0.397167	-0.615769	0.4715	0.998796	no
ENSG00000004142	ENSG00000004142	POLDIP2	chr17:28347176-28357522	Control	TC32	OK	20.9112	26.8694	0.361689	1.05209	0.2144	0.998796	no
ENSG00000004399	ENSG00000004399	PLXND1	chr3:129555174-129606818	Control	TC32	OK	368.714	341.336	-0.111307	-0.195397	0.83355	0.998796	no
ENSG00000004455	ENSG00000004455	AK2	chr1:32986951-33080996	Control	TC32	OK	32.0538	36.9821	0.206333	0.193778	0.65665	0.998796	no
ENSG00000004478	ENSG00000004478	FKBP4	chr12:1946053-2941140	Control	TC32	OK	18.499	20.2564	0.130933	0.116923	0.83385	0.998796	no
ENSG00000004487	ENSG00000004487	KDM1A	chr1:23019442-23177808	Control	TC32	OK	20.4663	19.2206	-0.0905948	-0.113338	0.8832	0.998796	no
ENSG00000004534	ENSG00000004534	RBM6	chr3:49940006-50189075	Control	TC32	OK	55.9843	59.3637	0.0845584	0.129606	0.8571	0.998796	no
ENSG00000004660	ENSG00000004660	CAMKK1	chr17:3860314-3894891	Control	TC32	OK	15.3922	9.50393	-0.695602	-1.97622	0.0212	0.541884	no
ENSG00000004700	ENSG00000004700	RECQL	chr12:21437614-21501669	Control	TC32	OK	17.9501	21.1949	0.239732	0.414984	0.5834	0.998796	no
ENSG00000004766	ENSG00000004766	VPS50	chr7:93232339-93361121	Control	TC32	OK	19.6186	19.9769	0.0261093	0.0420629	0.9582	0.998796	no
ENSG00000004779	ENSG00000004779	NDUFAB1	chr16:23581001-23596356	Control	TC32	OK	18.5489	24.2529	0.386822	0.836999	0.3247	0.998796	no
ENSG00000004799	ENSG00000004799	PDK4	chr7:95583498-95596491	Control	TC32	OK	10.6302	3.1242	-1.76661	-2.46603	0.0006	0.0547174	no
ENSG00000004809	ENSG00000004809	SLC22A16	chr6:110424686-110476641	Control	TC32	OK	19.6877	10.3549	-0.926982	-1.5822	0.0613	0.862346	no
ENSG00000004864	ENSG00000004864	SLC25A13	chr7:96120219-96322147	Control	TC32	OK	36.657	38.3711	0.0659325	0.116883	0.8844	0.998796	no
ENSG00000004866	ENSG00000004866	ST7	chr7:116952445-117230103	Control	TC32	OK	13.4226	10.2068	-0.395132	-0.608693	0.4366	0.998796	no
ENSG00000004897	ENSG00000004897	CDC27	chr17:47117702-47189422	Control	TC32	OK	13.7884	18.3272	0.410525	0.546656	0.48715	0.998796	no
ENSG00000004961	ENSG00000004961	HCCS	chrX:11111300-11123078	Control	TC32	OK	14.9079	19.3371	0.37529	0.872602	0.30285	0.998796	no
ENSG00000004975	ENSG00000004975	DVL2	chr17:7225340-7234545	Control	TC32	OK	35.7384	27.6109	-0.372237	-0.717484	0.3921	0.998796	no
ENSG00000005007	ENSG00000005007	UPF1	chr19:18831937-18868236	Control	TC32	OK	40.1174	34.0636	-0.235996	-0.385129	0.63005	0.998796	no
ENSG00000005020	ENSG00000005020	SKAP2	chr7:26667061-26995239	Control	TC32	OK	73.6133	58.6142	-0.328716	-0.546627	0.49695	0.998796	no
ENSG00000005022	ENSG00000005022	SLC25A5	chrX:119466033-119471319	Control	TC32	OK	212.223	194.688	-0.124418	-0.312787	0.70325	0.998796	no
ENSG00000005059	ENSG00000005059	MCUB	chr4:109560204-109703583	Control	TC32	OK	8.59594	4.42965	-0.956462	-1.40178	0.09315	0.972327	no
ENSG00000005075	ENSG00000005075	POLR2J	chr7:102464928-102478907	Control	TC32	OK	23.5405	26.0416	0.145674	0.31888	0.71415	0.998796	no
ENSG00000005100	ENSG00000005100	DHX33	chr17:5282264-5469060	Control	TC32	OK	6.01745	6.44227	0.0984169	0.0986423	0.9155	0.998796	no
ENSG00000005156	ENSG00000005156	LIG3	chr17:34927858-35121522	Control	TC32	OK	30.9069	26.2366	-0.236349	-0.257161	0.71005	0.998796	no
ENSG00000005175	ENSG00000005175	RPAP3	chr12:47661248-47706061	Control	TC32	OK	11.3525	8.9613	-0.341228	-0.63556	0.3883	0.998796	no
ENSG00000005194	ENSG00000005194	CIAPIN1	chr16:57428168-57487327	Control	TC32	OK	12.2367	11.2161	-0.125642	-0.13057	0.8556	0.998796	no
ENSG00000005206	ENSG00000005206	SPPL2B	chr19:2252251-2354806	Control	TC32	OK	20.7247	13.4122	-0.627808	-0.294979	0.4546	0.998796	no
ENSG00000005238	ENSG00000005238	FAM214B	chr9:35104111-35116341	Control	TC32	OK	24.7191	20.6185	-0.26169	-0.487082	0.51785	0.998796	no
ENSG00000005243	ENSG00000005243	COPZ2	chr17:48026166-48038030	Control	TC32	OK	3.39736	3.58512	0.0776068	0.0733882	0.9313	0.998796	no
ENSG00000005302	ENSG00000005302	MSL3	chrX:11758158-11775753	Control	TC32	OK	16.7456	15.0529	-0.153745	-0.26513	0.7322	0.998796	no
ENSG00000005339	ENSG00000005339	CREBBP	chr16:3725053-3880726	Control	TC32	OK	75.6843	78.5765	0.0541049	0.0667349	0.9338	0.998796	no
ENSG00000005436	ENSG00000005436	GCFC2	chr2:75646782-75710989	Control	TC32	OK	8.92311	5.84472	-0.610413	-0.571648	0.4257	0.998796	no
ENSG00000005483	ENSG00000005483	KMT2E	chr7:105013424-105399308	Control	TC32	OK	46.6955	49.4802	0.0835679	0.106052	0.8705	0.998796	no
ENSG00000005486	ENSG00000005486	RHBDD2	chr7:75842601-75888926	Control	TC32	OK	39.0821	20.8188	-0.908623	-2.30563	0.00595	0.244992	no
ENSG00000005700	ENSG00000005700	IBTK	chr6:82169982-82247754	Control	TC32	OK	10.938	14.3231	0.388988	1.02824	0.2249	0.998796	no
ENSG00000005801	ENSG00000005801	ZNF195	chr11:3336720-3379222	Control	TC32	OK	18.6648	17.1065	-0.125776	-0.202433	0.80365	0.998796	no
ENSG00000005810	ENSG00000005810	MYCBP2	chr13:76990659-77327050	Control	TC32	OK	44.828	32.6569	-0.45701	-0.388396	0.5205	0.998796	no
ENSG00000005812	ENSG00000005812	FBXL3	chr13:76990659-77327050	Control	TC32	OK	28.7281	21.954	-0.38798	-0.304127	0.5818	0.998796	no
ENSG00000005844	ENSG00000005844	ITGAL	chr16:30472657-30523185	Control	TC32	OK	183.281	189.156	0.0455255	0.0742863	0.92335	0.998796	no
ENSG00000005882	ENSG00000005882	PDK2	chr17:50094736-50129882	Control	TC32	OK	4.81246	3.01015	-0.676937	-0.707977	0.40885	0.998796	no
ENSG00000005884	ENSG00000005884	ITGA3	chr17:50055967-50090481	Control	TC32	OK	81.7718	13.2544	-2.62514	-3.76748	5e-05	0.00772968	yes
ENSG00000005889	ENSG00000005889	ZFX	chrX:24146224-24216255	Control	TC32	OK	18.6542	21.6217	0.21298	0.281134	0.65675	0.998796	no
ENSG00000005893	ENSG00000005893	LAMP2	chrX:120427826-120469365	Control	TC32	OK	113.617	113.001	-0.00783739	-0.0220737	0.9775	0.998796	no
ENSG00000006007	ENSG00000006007	GDE1	chr16:19501688-19522145	Control	TC32	OK	33.6708	31.4299	-0.0993595	-0.220831	0.7939	0.998796	no
ENSG00000006015	ENSG00000006015	REX1BD	chr19:18571729-18621039	Control	TC32	OK	37.7481	34.8325	-0.11597	-0.086459	0.9319	0.998796	no
ENSG00000006016	ENSG00000006016	CRLF1	chr19:18571729-18621039	Control	TC32	OK	4.04116	4.39616	0.121473	0.0547259	0.9527	0.998796	no
ENSG00000006025	ENSG00000006025	OSBPL7	chr17:47807371-47821834	Control	TC32	OK	5.81298	1.4156	-2.03787	-2.07643	0.00455	0.222189	no
ENSG00000006062	ENSG00000006062	MAP3K14	chr17:45190930-45317040	Control	TC32	OK	9.96266	9.75182	-0.0308596	-0.0252999	0.9686	0.998796	no
ENSG00000006118	ENSG00000006118	TMEM132A	chr11:60913165-60952530	Control	TC32	OK	15.2296	17.767	0.222318	0.141348	0.84575	0.998796	no
ENSG00000006125	ENSG00000006125	AP2B1	chr17:35568108-35868891	Control	TC32	OK	22.7551	20.0329	-0.183819	-0.378428	0.56825	0.998796	no
ENSG00000006194	ENSG00000006194	ZNF263	chr16:3263742-3318852	Control	TC32	OK	18.9903	16.3658	-0.214578	-0.406244	0.62645	0.998796	no
ENSG00000006282	ENSG00000006282	SPATA20	chr17:50532542-50555852	Control	TC32	OK	55.2302	47.3893	-0.220898	-0.433307	0.615	0.998796	no
ENSG00000006327	ENSG00000006327	TNFRSF12A	chr16:3014711-3022383	Control	TC32	OK	7.28362	9.58198	0.395667	0.751719	0.3661	0.998796	no
ENSG00000006451	ENSG00000006451	RALA	chr7:39623482-39708124	Control	TC32	OK	15.7273	20.9844	0.416047	0.929664	0.26995	0.998796	no
ENSG00000006453	ENSG00000006453	BAIAP2L1	chr7:98252378-98401068	Control	TC32	OK	15.0251	11.3615	-0.40322	-0.234393	0.756	0.998796	no
ENSG00000006459	ENSG00000006459	KDM7A	chr7:140084745-140177035	Control	TC32	OK	20.5744	20.8307	0.017858	0.0229897	0.9781	0.998796	no
ENSG00000006530	ENSG00000006530	AGK	chr7:141529202-141702153	Control	TC32	OK	4.68218	4.37156	-0.0990318	-0.0870742	0.91505	0.998796	no
ENSG00000006534	ENSG00000006534	ALDH3B1	chr11:68008577-68030461	Control	TC32	OK	39.9217	28.1263	-0.505256	-1.39998	0.07305	0.894832	no
ENSG00000006576	ENSG00000006576	PHTF2	chr7:77798791-77957503	Control	TC32	OK	14.843	11.2175	-0.404029	-0.419435	0.51915	0.998796	no
ENSG00000006606	ENSG00000006606	CCL26	chr7:75769532-75789896	Control	TC32	OK	9.62198	1.18721	-3.01876	-3.0978	0.00475	0.227347	no
ENSG00000006607	ENSG00000006607	FARP2	chr2:241356242-241509730	Control	TC32	OK	11.3083	10.3979	-0.121094	-0.126556	0.827	0.998796	no
ENSG00000006625	ENSG00000006625	GGCT	chr7:30496620-30634033	Control	TC32	OK	47.049	50.0726	0.0898573	0.0972239	0.90395	0.998796	no
ENSG00000006634	ENSG00000006634	DBF4	chr7:87833567-87909541	Control	TC32	OK	5.02094	6.49954	0.372378	0.343787	0.6121	0.998796	no
ENSG00000006652	ENSG00000006652	IFRD1	chr7:112422967-112491062	Control	TC32	OK	24.5543	26.1908	0.0930841	0.171015	0.82345	0.998796	no
ENSG00000006695	ENSG00000006695	COX10	chr17:14069495-14208677	Control	TC32	OK	10.517	13.0607	0.312509	0.649354	0.4381	0.998796	no
ENSG00000006704	ENSG00000006704	GTF2IRD1	chr7:74453789-74602604	Control	TC32	OK	12.5715	16.1176	0.358484	0.467035	0.59185	0.998796	no
ENSG00000006712	ENSG00000006712	PAF1	chr19:39385851-39391195	Control	TC32	OK	20.3952	22.2968	0.128605	0.204329	0.76495	0.998796	no
ENSG00000006715	ENSG00000006715	VPS41	chr7:38722962-38932394	Control	TC32	OK	63.0731	60.7568	-0.0539787	-0.0767784	0.92665	0.998796	no
ENSG00000006744	ENSG00000006744	ELAC2	chr17:12992390-13018187	Control	TC32	OK	29.054	23.9775	-0.277056	-0.516296	0.5415	0.998796	no
ENSG00000006756	ENSG00000006756	ARSD	chrX:2903969-2929351	Control	TC32	OK	10.1576	9.98522	-0.0246869	-0.0403392	0.9515	0.998796	no
ENSG00000006757	ENSG00000006757	PNPLA4	chrX:7898246-7927739	Control	TC32	OK	4.84227	2.80561	-0.787369	-0.967247	0.26775	0.998796	no
ENSG00000006831	ENSG00000006831	ADIPOR2	chr12:1688573-1788678	Control	TC32	OK	12.7251	12.4355	-0.0332077	-0.0634229	0.92205	0.998796	no
ENSG00000007038	ENSG00000007038	PRSS21	chr16:2817179-2826304	Control	TC32	OK	17.1106	5.74671	-1.57408	-2.7099	0.00405	0.207224	no
ENSG00000007047	ENSG00000007047	MARK4	chr19:45071499-45305283	Control	TC32	OK	5.36796	3.98301	-0.430516	-0.346722	0.6469	0.998796	no
ENSG00000007080	ENSG00000007080	CCDC124	chr19:17933015-17943991	Control	TC32	OK	37.6069	36.6984	-0.0352832	-0.0878019	0.9166	0.998796	no
ENSG00000007168	ENSG00000007168	PAFAH1B1	chr17:2593209-2685615	Control	TC32	OK	54.6067	56.8198	0.0573154	0.0831786	0.914	0.998796	no
ENSG00000007202	ENSG00000007202	KIAA0100	chr17:28455751-28645454	Control	TC32	OK	215.517	147.057	-0.55142	-0.651799	0.33115	0.998796	no
ENSG00000007237	ENSG00000007237	GAS7	chr17:9910608-10198551	Control	TC32	OK	74.2627	33.7569	-1.13746	-1.90136	0.0098	0.333304	no
ENSG00000007255	ENSG00000007255	TRAPPC6A	chr19:45071499-45305283	Control	TC32	OK	13.7835	5.8475	-1.23705	-0.928855	0.2445	0.998796	no
ENSG00000007264	ENSG00000007264	MATK	chr19:3777969-3802129	Control	TC32	OK	96.2296	91.7043	-0.0694908	-0.179941	0.83255	0.998796	no
ENSG00000007341	ENSG00000007341	ST7L	chr1:112466540-112671619	Control	TC32	OK	7.70118	10.9679	0.510138	0.306194	0.5603	0.998796	no
ENSG00000007376	ENSG00000007376	RPUSD1	chr16:784973-800737	Control	TC32	OK	8.78104	6.68272	-0.393957	-0.735225	0.36975	0.998796	no
ENSG00000007392	ENSG00000007392	LUC7L	chr16:188968-229463	Control	TC32	OK	28.151	22.0979	-0.349275	-0.616202	0.43995	0.998796	no
ENSG00000007520	ENSG00000007520	TSR3	chr16:1333600-1351911	Control	TC32	OK	21.8075	15.1043	-0.529859	-1.06358	0.2121	0.998796	no
ENSG00000007541	ENSG00000007541	PIGQ	chr16:566994-584136	Control	TC32	OK	24.984	14.5153	-0.783427	-1.61577	0.0382	0.731636	no
ENSG00000007545	ENSG00000007545	CRAMP1	chr16:1612324-1702280	Control	TC32	OK	6.99022	8.00564	0.195679	0.175669	0.72745	0.998796	no
ENSG00000007923	ENSG00000007923	DNAJC11	chr1:6624865-6701924	Control	TC32	OK	24.5854	32.5166	0.403372	0.536617	0.48845	0.998796	no
ENSG00000007944	ENSG00000007944	MYLIP	chr6:16129124-16148248	Control	TC32	OK	3.23659	3.44745	0.0910546	0.172673	0.8397	0.998796	no
ENSG00000008018	ENSG00000008018	PSMB1	chr6:170535116-170553341	Control	TC32	OK	41.0569	54.4981	0.408583	1.12313	0.18655	0.998796	no
ENSG00000008083	ENSG00000008083	JARID2	chr6:15246295-15522040	Control	TC32	OK	19.6486	13.7097	-0.519227	-0.940356	0.132	0.998796	no
ENSG00000008128	ENSG00000008128	CDK11A	chr1:1702729-1745999	Control	TC32	OK	38.173	34.1789	-0.159447	-0.217659	0.7997	0.998796	no
ENSG00000008130	ENSG00000008130	NADK	chr1:1751231-1780457	Control	TC32	OK	82.672	70.0859	-0.238275	-0.42166	0.6219	0.998796	no
ENSG00000008256	ENSG00000008256	CYTH3	chr7:6161775-6272644	Control	TC32	OK	4.75127	4.53043	-0.0686653	-0.0671935	0.93705	0.998796	no
ENSG00000008282	ENSG00000008282	SYPL1	chr7:106090502-106112576	Control	TC32	OK	30.7135	35.2971	0.200681	0.383645	0.64645	0.998796	no
ENSG00000008283	ENSG00000008283	CYB561	chr17:63432303-63446378	Control	TC32	OK	5.5682	3.6102	-0.625134	-1.03899	0.12805	0.998796	no
ENSG00000008294	ENSG00000008294	SPAG9	chr17:50962173-51120865	Control	TC32	OK	109.366	127.616	0.222646	0.403033	0.63125	0.998796	no
ENSG00000008324	ENSG00000008324	SS18L2	chr3:42547968-42665854	Control	TC32	FAIL	9.78756	9.49021	0	0	1	1	no
ENSG00000008382	ENSG00000008382	MPND	chr19:4343526-4360086	Control	TC32	OK	37.1046	25.7033	-0.529645	-0.794189	0.35	0.998796	no
ENSG00000008394	ENSG00000008394	MGST1	chr12:16347141-16610594	Control	TC32	OK	82.1082	103.582	0.335176	0.567631	0.49205	0.998796	no
ENSG00000008405	ENSG00000008405	CRY1	chr12:106991363-107123314	Control	TC32	OK	6.43079	6.83834	0.0886502	0.147738	0.85145	0.998796	no
ENSG00000008441	ENSG00000008441	NFIX	chr19:12995607-13098796	Control	TC32	OK	3.03908	5.74278	0.918114	1.10418	0.10665	0.998796	no
ENSG00000008513	ENSG00000008513	ST3GAL1	chr8:133454847-133571940	Control	TC32	OK	29.2509	39.7759	0.443417	0.656823	0.24485	0.998796	no
ENSG00000008517	ENSG00000008517	IL32	chr16:3065296-3087100	Control	TC32	OK	3.51662	3.65605	0.0560972	0.047568	0.95425	0.998796	no
ENSG00000008710	ENSG00000008710	PKD1	chr16:2039814-2135898	Control	TC32	OK	20.788	23.3093	0.165153	0.154925	0.7764	0.998796	no
ENSG00000008838	ENSG00000008838	MED24	chr17:40019096-40100725	Control	TC32	OK	56.3861	53.4169	-0.0780441	-0.129175	0.8951	0.998796	no
ENSG00000008853	ENSG00000008853	RHOBTB2	chr8:22687658-23083619	Control	TC32	OK	21.9684	5.07451	-2.11409	-1.53781	0.00945	0.324454	no
ENSG00000008869	ENSG00000008869	HEATR5B	chr2:36968382-37084342	Control	TC32	OK	12.0057	8.53875	-0.491627	-0.830465	0.2342	0.998796	no
ENSG00000008952	ENSG00000008952	SEC62	chr3:169939352-169998373	Control	TC32	OK	50.3758	54.3986	0.110836	0.230813	0.7733	0.998796	no
ENSG00000008988	ENSG00000008988	RPS20	chr8:56067294-56074581	Control	TC32	OK	389.274	436.452	0.165035	0.508533	0.55745	0.998796	no
ENSG00000009307	ENSG00000009307	CSDE1	chr1:114716912-114758676	Control	TC32	OK	368.856	399.815	0.116275	0.214412	0.7989	0.998796	no
ENSG00000009335	ENSG00000009335	UBE3C	chr7:157138912-157269372	Control	TC32	OK	70.8356	76.8638	0.117831	0.200345	0.8132	0.998796	no
ENSG00000009413	ENSG00000009413	REV3L	chr6:111299027-111606278	Control	TC32	OK	9.71715	15.4501	0.669007	0.59386	0.1532	0.998796	no
ENSG00000009780	ENSG00000009780	FAM76A	chr1:27725978-27763122	Control	TC32	OK	9.47235	7.46104	-0.344346	-0.410671	0.6094	0.998796	no
ENSG00000009790	ENSG00000009790	TRAF3IP3	chr1:209756031-209784559	Control	TC32	OK	3.09579	13.9058	2.1673	2.93302	0.0012	0.092018	no
ENSG00000009830	ENSG00000009830	POMT2	chr14:77274955-77331597	Control	TC32	OK	15.0532	18.2502	0.277842	0.306603	0.70795	0.998796	no
ENSG00000009844	ENSG00000009844	VTA1	chr6:142147161-142224689	Control	TC32	OK	19.921	20.7465	0.0585727	0.0877061	0.9152	0.998796	no
ENSG00000009950	ENSG00000009950	MLXIPL	chr7:73593193-73624543	Control	TC32	OK	4.68522	6.2364	0.412597	0.685775	0.41605	0.998796	no
ENSG00000009954	ENSG00000009954	BAZ1B	chr7:73440397-73522278	Control	TC32	OK	28.5234	27.2353	-0.0666719	-0.17008	0.81685	0.998796	no
ENSG00000010017	ENSG00000010017	RANBP9	chr6:13615326-13711564	Control	TC32	OK	25.8704	19.3105	-0.421915	-0.698348	0.39855	0.998796	no
ENSG00000010072	ENSG00000010072	SPRTN	chr1:231332752-231355023	Control	TC32	OK	9.19872	7.51379	-0.291892	-0.246943	0.78005	0.998796	no
ENSG00000010165	ENSG00000010165	METTL13	chr1:171781663-171814023	Control	TC32	OK	17.3592	20.4723	0.237976	0.395297	0.60185	0.998796	no
ENSG00000010219	ENSG00000010219	DYRK4	chr12:4562203-4851927	Control	TC32	OK	53.5724	28.5774	-0.906615	-1.20501	0.16675	0.998796	no
ENSG00000010244	ENSG00000010244	ZNF207	chr17:32266175-32381886	Control	TC32	OK	146.742	137.047	-0.0986076	-0.13457	0.85875	0.998796	no
ENSG00000010256	ENSG00000010256	UQCRC1	chr3:48599001-48610976	Control	TC32	OK	167.028	183.612	0.136564	0.359267	0.6725	0.998796	no
ENSG00000010270	ENSG00000010270	STARD3NL	chr7:38178221-38230671	Control	TC32	OK	11.247	16.5831	0.560171	1.25662	0.1495	0.998796	no
ENSG00000010278	ENSG00000010278	CD9	chr12:6199714-6238271	Control	TC32	OK	215.518	162.109	-0.410847	-0.988361	0.2494	0.998796	no
ENSG00000010292	ENSG00000010292	NCAPD2	chr12:6491885-6531955	Control	TC32	OK	19.1517	14.5787	-0.393606	-0.244358	0.62995	0.998796	no
ENSG00000010295	ENSG00000010295	IFFO1	chr12:6538374-6556083	Control	TC32	OK	25.5214	14.073	-0.858783	-2.38084	0.0054	0.240908	no
ENSG00000010318	ENSG00000010318	PHF7	chr3:52410656-52423641	Control	TC32	OK	10.1132	8.32191	-0.28125	-0.490604	0.52395	0.998796	no
ENSG00000010319	ENSG00000010319	SEMA3G	chr3:52433052-52445085	Control	TC32	OK	8.32084	1.97659	-2.07372	-2.65916	0.0003	0.0334853	yes
ENSG00000010322	ENSG00000010322	NISCH	chr3:52455117-52493071	Control	TC32	OK	31.1965	19.8158	-0.654734	-1.17397	0.11485	0.998796	no
ENSG00000010327	ENSG00000010327	STAB1	chr3:52495337-52770949	Control	TC32	OK	3.03684	7.18046	1.24151	0.359549	0.1941	0.998796	no
ENSG00000010361	ENSG00000010361	FUZ	chr19:49766967-49817376	Control	TC32	OK	5.68492	5.89823	0.0531437	0.0300133	0.96155	0.998796	no
ENSG00000010404	ENSG00000010404	IDS	chrX:149476989-149550510	Control	TC32	OK	19.6968	23.0317	0.225658	0.343988	0.66575	0.998796	no
ENSG00000010539	ENSG00000010539	ZNF200	chr16:3188211-3236221	Control	TC32	OK	8.10528	7.75971	-0.062859	-0.116482	0.8888	0.998796	no
ENSG00000010610	ENSG00000010610	CD4	chr12:6786857-6820808	Control	TC32	OK	20.0045	14.451	-0.469149	-0.97406	0.1873	0.998796	no
ENSG00000010626	ENSG00000010626	LRRC23	chr12:6867118-6923698	Control	TC32	OK	11.5418	9.50136	-0.280659	-0.150375	0.83635	0.998796	no
ENSG00000010671	ENSG00000010671	BTK	chrX:101349446-101390796	Control	TC32	OK	74.454	65.0812	-0.194109	-0.299628	0.72505	0.998796	no
ENSG00000010704	ENSG00000010704	HFE	chr6:26087280-26098343	Control	TC32	OK	3.10766	2.95868	-0.0708746	-0.0831615	0.9211	0.998796	no
ENSG00000010803	ENSG00000010803	SCMH1	chr1:41014589-41242154	Control	TC32	OK	4.34046	5.26171	0.277684	0.275047	0.7007	0.998796	no
ENSG00000010810	ENSG00000010810	FYN	chr6:111660331-111873452	Control	TC32	OK	28.3004	21.3535	-0.406349	-0.791183	0.367	0.998796	no
ENSG00000010818	ENSG00000010818	HIVEP2	chr6:142748442-142956698	Control	TC32	OK	3.99573	4.7385	0.245972	0.206911	0.5143	0.998796	no
ENSG00000011007	ENSG00000011007	ELOA	chr1:23743154-23778287	Control	TC32	OK	22.8137	24.5725	0.107145	0.295659	0.7068	0.998796	no
ENSG00000011009	ENSG00000011009	LYPLA2	chr1:23790969-23795539	Control	TC32	OK	15.7897	10.3693	-0.606662	-1.31178	0.1228	0.998796	no
ENSG00000011021	ENSG00000011021	CLCN6	chr1:11761786-11848345	Control	TC32	OK	13.8729	16.9249	0.286881	0.330422	0.60025	0.998796	no
ENSG00000011028	ENSG00000011028	MRC2	chr17:62626030-62693597	Control	TC32	OK	16.3458	5.20597	-1.65068	-3.40376	5e-05	0.00772968	yes
ENSG00000011114	ENSG00000011114	BTBD7	chr14:93237549-93333092	Control	TC32	OK	10.1687	8.17082	-0.315587	-0.462319	0.45925	0.998796	no
ENSG00000011132	ENSG00000011132	APBA3	chr19:3750818-3761699	Control	TC32	OK	9.3102	15.8176	0.764643	1.27237	0.12845	0.998796	no
ENSG00000011143	ENSG00000011143	MKS1	chr17:58205436-58268518	Control	TC32	OK	9.31531	6.18555	-0.590701	-0.919302	0.2764	0.998796	no
ENSG00000011198	ENSG00000011198	ABHD5	chr3:43286511-43734371	Control	TC32	OK	55.7696	29.8906	-0.899785	-1.29427	0.11285	0.998796	no
ENSG00000011243	ENSG00000011243	AKAP8L	chr19:15353384-15419141	Control	TC32	OK	38.6207	35.6574	-0.115173	-0.198928	0.81925	0.998796	no
ENSG00000011258	ENSG00000011258	MBTD1	chr17:51177424-51260163	Control	TC32	OK	8.87132	8.7306	-0.0230692	-0.032582	0.958	0.998796	no
ENSG00000011260	ENSG00000011260	UTP18	chr17:51260527-51297936	Control	TC32	OK	11.5652	13.1203	0.182003	0.299536	0.7146	0.998796	no
ENSG00000011275	ENSG00000011275	RNF216	chr7:5620046-5781739	Control	TC32	OK	25.7771	27.1878	0.0768714	0.122192	0.8673	0.998796	no
ENSG00000011295	ENSG00000011295	TTC19	chr17:15976559-16353656	Control	TC32	OK	19.9521	16.7383	-0.253385	-0.173918	0.7685	0.998796	no
ENSG00000011304	ENSG00000011304	PTBP1	chr19:797074-812327	Control	TC32	OK	118.991	119.025	0.00040936	0.000870381	0.999	0.999519	no
ENSG00000011376	ENSG00000011376	LARS2	chr3:45388505-45549421	Control	TC32	OK	9.67527	7.1146	-0.443518	-0.678391	0.33085	0.998796	no
ENSG00000011405	ENSG00000011405	PIK3C2A	chr11:17074388-17207983	Control	TC32	OK	25.3111	19.3788	-0.385289	-0.225236	0.65375	0.998796	no
ENSG00000011422	ENSG00000011422	PLAUR	chr19:43646094-43670547	Control	TC32	OK	115.134	197.37	0.777587	2.21668	0.00895	0.31286	no
ENSG00000011451	ENSG00000011451	WIZ	chr19:15419979-15449951	Control	TC32	OK	8.73281	9.59224	0.135422	0.306684	0.68095	0.998796	no
ENSG00000011454	ENSG00000011454	RABGAP1	chr9:122940832-123104866	Control	TC32	OK	29.1154	23.8389	-0.288461	-0.41851	0.56005	0.998796	no
ENSG00000011478	ENSG00000011478	QPCTL	chr19:45687453-45703989	Control	TC32	OK	4.28663	3.20229	-0.420741	-0.286636	0.6612	0.998796	no
ENSG00000011485	ENSG00000011485	PPP5C	chr19:46346993-46392981	Control	TC32	OK	31.3424	41.4597	0.403595	0.702476	0.4009	0.998796	no
ENSG00000011523	ENSG00000011523	CEP68	chr2:65056365-65130106	Control	TC32	OK	13.048	10.107	-0.36847	-0.557257	0.5224	0.998796	no
ENSG00000011566	ENSG00000011566	MAP4K3	chr2:39249265-39717963	Control	TC32	OK	41.8145	34.9448	-0.258927	-0.308805	0.65245	0.998796	no
ENSG00000011590	ENSG00000011590	ZBTB32	chr19:35704526-35717038	Control	TC32	OK	2.91776	3.61797	0.310318	0.334628	0.6879	0.998796	no
ENSG00000011600	ENSG00000011600	TYROBP	chr19:35904400-35908295	Control	TC32	OK	728.832	592.588	-0.298555	-0.966235	0.2636	0.998796	no
ENSG00000011638	ENSG00000011638	TMEM159	chr16:20933110-21180616	Control	TC32	OK	5.92806	3.23784	-0.872529	-1.38061	0.08945	0.96202	no
ENSG00000012048	ENSG00000012048	BRCA1	chr17:43044294-43211689	Control	TC32	OK	7.26386	7.19125	-0.0144935	-0.00687349	0.9852	0.998796	no
ENSG00000012061	ENSG00000012061	ERCC1	chr19:45379633-45478828	Control	TC32	OK	22.5204	27.1008	0.267099	0.482434	0.56275	0.998796	no
ENSG00000012124	ENSG00000012124	CD22	chr19:35319260-35347355	Control	TC32	OK	75.8524	22.1876	-1.77344	-3.48096	0.00025	0.0298647	yes
ENSG00000012174	ENSG00000012174	MBTPS2	chrX:21839635-21885424	Control	TC32	OK	8.34913	9.83135	0.235764	0.568128	0.5068	0.998796	no
ENSG00000012211	ENSG00000012211	PRICKLE3	chrX:49175263-49186528	Control	TC32	OK	9.83627	6.84938	-0.522138	-0.839991	0.30975	0.998796	no
ENSG00000012232	ENSG00000012232	EXTL3	chr8:28600468-28755599	Control	TC32	OK	6.13286	4.53458	-0.435593	-0.884759	0.18685	0.998796	no
ENSG00000012660	ENSG00000012660	ELOVL5	chr6:53267397-53349179	Control	TC32	OK	67.697	65.3332	-0.0512746	-0.12697	0.8714	0.998796	no
ENSG00000012779	ENSG00000012779	ALOX5	chr10:45374175-45453121	Control	TC32	OK	11.9861	4.55133	-1.397	-1.71628	0.0388	0.731636	no
ENSG00000012817	ENSG00000012817	KDM5D	chrY:19703864-19744939	Control	TC32	OK	46.331	30.9727	-0.580979	-1.14514	0.1685	0.998796	no
ENSG00000012822	ENSG00000012822	CALCOCO1	chr12:53708516-53727745	Control	TC32	OK	80.0103	69.0591	-0.212353	-0.499945	0.52185	0.998796	no
ENSG00000012963	ENSG00000012963	UBR7	chr14:93184950-93229215	Control	TC32	OK	3.29933	3.54476	0.103516	0.15288	0.8493	0.998796	no
ENSG00000012983	ENSG00000012983	MAP4K5	chr14:50418500-50668331	Control	TC32	OK	16.4426	7.38927	-1.15393	-0.993996	0.16325	0.998796	no
ENSG00000013275	ENSG00000013275	PSMC4	chr19:39971004-39981441	Control	TC32	OK	19.2459	22.6972	0.237965	0.591828	0.48945	0.998796	no
ENSG00000013288	ENSG00000013288	MAN2B2	chr4:6575174-6623362	Control	TC32	OK	22.5967	16.6563	-0.440042	-0.967475	0.16625	0.998796	no
ENSG00000013306	ENSG00000013306	SLC25A39	chr17:44319624-44324870	Control	TC32	OK	27.9089	28.0953	0.00960535	0.0238296	0.9779	0.998796	no
ENSG00000013364	ENSG00000013364	MVP	chr16:29806105-29848039	Control	TC32	OK	106.208	111.484	0.0699477	0.0847832	0.91285	0.998796	no
ENSG00000013374	ENSG00000013374	NUB1	chr7:151341698-151413354	Control	TC32	OK	41.4201	44.8457	0.114638	0.231645	0.7846	0.998796	no
ENSG00000013375	ENSG00000013375	PGM3	chr6:83067665-83198932	Control	TC32	FAIL	10.7893	28.6684	0	0	1	1	no
ENSG00000013441	ENSG00000013441	CLK1	chr2:200853008-200864744	Control	TC32	OK	43.0697	44.8528	0.0585227	0.112848	0.89285	0.998796	no
ENSG00000013503	ENSG00000013503	POLR3B	chr12:106357657-106889316	Control	TC32	OK	4.39956	6.58602	0.582048	0.714248	0.3004	0.998796	no
ENSG00000013523	ENSG00000013523	ANGEL1	chr14:76762188-76826246	Control	TC32	OK	35.8175	23.0778	-0.634159	-0.652817	0.32195	0.998796	no
ENSG00000013561	ENSG00000013561	RNF14	chr5:141943584-141990291	Control	TC32	OK	18.7089	20.2511	0.114275	0.207942	0.80155	0.998796	no
ENSG00000013563	ENSG00000013563	DNASE1L1	chrX:154389954-154421726	Control	TC32	OK	12.643	9.68727	-0.384176	-0.288501	0.67755	0.998796	no
ENSG00000013573	ENSG00000013573	DDX11	chr12:31020762-31104791	Control	TC32	OK	4.65571	6.12417	0.395515	0.518787	0.52795	0.998796	no
ENSG00000013583	ENSG00000013583	HEBP1	chr12:12927725-13000273	Control	TC32	OK	26.6767	25.2261	-0.0806625	-0.205373	0.81005	0.998796	no
ENSG00000013810	ENSG00000013810	TACC3	chr4:1721489-1745176	Control	TC32	OK	19.4169	13.3434	-0.541187	-0.915541	0.2659	0.998796	no
ENSG00000014123	ENSG00000014123	UFL1	chr6:96358373-96555276	Control	TC32	OK	10.2708	9.94619	-0.0463336	-0.131295	0.87935	0.998796	no
ENSG00000014138	ENSG00000014138	POLA2	chr11:65261761-65305589	Control	TC32	OK	11.0639	10.9363	-0.0167429	-0.0347257	0.96685	0.998796	no
ENSG00000014164	ENSG00000014164	ZC3H3	chr8:143437654-143541453	Control	TC32	OK	9.36539	7.8513	-0.254407	-0.477266	0.48805	0.998796	no
ENSG00000014216	ENSG00000014216	CAPN1	chr11:65177605-65212006	Control	TC32	OK	86.1292	72.8304	-0.241961	-0.540187	0.5143	0.998796	no
ENSG00000014257	ENSG00000014257	ACPP	chr3:132317366-132368298	Control	TC32	OK	6.11567	3.91194	-0.644626	-1.01412	0.1993	0.998796	no
ENSG00000014641	ENSG00000014641	MDH1	chr2:63121382-63827843	Control	TC32	OK	387.085	388.572	0.00552845	0.0131107	0.9876	0.998796	no
ENSG00000014824	ENSG00000014824	SLC30A9	chr4:41990471-42090457	Control	TC32	OK	25.7083	26.838	0.0620457	0.101748	0.9066	0.998796	no
ENSG00000014919	ENSG00000014919	COX15	chr10:99659505-99756134	Control	TC32	OK	30.5736	26.1419	-0.225921	-0.332292	0.64195	0.998796	no
ENSG00000015133	ENSG00000015133	CCDC88C	chr14:91271322-91417844	Control	TC32	OK	16.1191	15.381	-0.0676256	-0.085837	0.928	0.998796	no
ENSG00000015153	ENSG00000015153	YAF2	chr12:42157103-42238349	Control	TC32	OK	14.695	17.7588	0.273203	0.339229	0.696	0.998796	no
ENSG00000015171	ENSG00000015171	ZMYND11	chr10:134464-254637	Control	TC32	OK	20.0953	17.6253	-0.18921	-0.256461	0.71585	0.998796	no
ENSG00000015285	ENSG00000015285	WAS	chrX:48676595-48691427	Control	TC32	OK	51.637	38.5207	-0.422771	-0.708166	0.35715	0.998796	no
ENSG00000015475	ENSG00000015475	BID	chr22:17734137-17774770	Control	TC32	OK	65.1014	86.1059	0.403424	0.675209	0.4084	0.998796	no
ENSG00000015479	ENSG00000015479	MATR3	chr5:138946719-139331677	Control	TC32	OK	80.0226	80.8445	0.0147428	0.0255458	0.97495	0.998796	no
ENSG00000015532	ENSG00000015532	XYLT2	chr17:50346091-50365232	Control	TC32	OK	7.88591	5.92905	-0.411475	-0.836596	0.2951	0.998796	no
ENSG00000015568	ENSG00000015568	RGPD5	chr2:109792757-109857695	Control	TC32	OK	28.0904	36.7976	0.389537	0.49994	0.56525	0.998796	no
ENSG00000015676	ENSG00000015676	NUDCD3	chr7:44379120-44490880	Control	TC32	OK	34.1645	27.0273	-0.338079	-0.385201	0.60225	0.998796	no
ENSG00000016391	ENSG00000016391	CHDH	chr3:53283427-53846390	Control	TC32	OK	5.50988	1.49005	-1.88665	-1.8889	0.0128	0.394074	no
ENSG00000016864	ENSG00000016864	GLT8D1	chr3:52495337-52770949	Control	TC32	OK	18.5489	19.2102	0.0505371	0.0315094	0.95215	0.998796	no
ENSG00000017260	ENSG00000017260	ATP2C1	chr3:130850594-131381475	Control	TC32	OK	33.4157	49.263	0.559977	0.795391	0.35345	0.998796	no
ENSG00000017797	ENSG00000017797	RALBP1	chr18:9475008-9538116	Control	TC32	OK	19.8057	19.9122	0.00773333	0.0193182	0.9796	0.998796	no
ENSG00000018189	ENSG00000018189	RUFY3	chr4:70703746-70807315	Control	TC32	OK	29.1328	35.9917	0.305018	0.497374	0.5429	0.998796	no
ENSG00000018280	ENSG00000018280	SLC11A1	chr2:218382028-218396894	Control	TC32	OK	8.52635	15.8841	0.89758	1.33347	0.08825	0.957306	no
ENSG00000018510	ENSG00000018510	AGPS	chr2:177227594-177559299	Control	TC32	OK	27.424	21.878	-0.325959	-0.265429	0.67165	0.998796	no
ENSG00000018610	ENSG00000018610	CXorf56	chrX:119538148-119565408	Control	TC32	OK	6.87722	7.73122	0.168871	0.336487	0.6775	0.998796	no
ENSG00000018699	ENSG00000018699	TTC27	chr2:32628031-32821051	Control	TC32	OK	6.57628	12.3772	0.912338	1.10803	0.1335	0.998796	no
ENSG00000019144	ENSG00000019144	PHLDB1	chr11:118606439-118679690	Control	TC32	OK	4.28624	12.6639	1.56294	2.27067	0.00195	0.129592	no
ENSG00000019169	ENSG00000019169	MARCO	chr2:118942165-118994660	Control	TC32	OK	26.9836	11.3242	-1.25267	-2.0073	0.0165	0.462208	no
ENSG00000019582	ENSG00000019582	CD74	chr5:150401636-150412929	Control	TC32	OK	1740.86	1144.89	-0.604597	-1.68134	0.04405	0.767542	no
ENSG00000019995	ENSG00000019995	ZRANB1	chr10:124917142-125161170	Control	TC32	OK	9.33069	10.5855	0.182032	0.242173	0.6915	0.998796	no
ENSG00000020129	ENSG00000020129	NCDN	chr1:35433489-35567274	Control	TC32	OK	6.03489	4.81151	-0.326839	-0.345223	0.6474	0.998796	no
ENSG00000020256	ENSG00000020256	ZFP64	chr20:52051662-52204308	Control	TC32	OK	6.25261	5.28112	-0.243616	-0.346345	0.61965	0.998796	no
ENSG00000020426	ENSG00000020426	MNAT1	chr14:60734741-61083733	Control	TC32	OK	18.998	18.3207	-0.0523659	-0.0243964	0.9709	0.998796	no
ENSG00000020577	ENSG00000020577	SAMD4A	chr14:54567096-54793315	Control	TC32	OK	10.9824	7.49159	-0.551846	-1.01303	0.1892	0.998796	no
ENSG00000020633	ENSG00000020633	RUNX3	chr1:24899510-24965121	Control	TC32	OK	9.44952	6.94122	-0.445053	-0.953579	0.2278	0.998796	no
ENSG00000020922	ENSG00000020922	MRE11	chr11:94415577-94499583	Control	TC32	OK	4.54274	4.8004	0.0795923	0.101589	0.88945	0.998796	no
ENSG00000021355	ENSG00000021355	SERPINB1	chr6:2832331-2842006	Control	TC32	OK	107.102	71.7778	-0.577375	-1.19562	0.1543	0.998796	no
ENSG00000021574	ENSG00000021574	SPAST	chr2:32063546-32157637	Control	TC32	OK	10.038	12.1323	0.273389	0.585596	0.47025	0.998796	no
ENSG00000021762	ENSG00000021762	OSBPL5	chr11:3087115-3166739	Control	TC32	OK	14.9882	7.65745	-0.968889	-1.63574	0.06395	0.876591	no
ENSG00000021776	ENSG00000021776	AQR	chr15:34851781-34969839	Control	TC32	OK	14.9085	17.8275	0.25797	0.383267	0.6114	0.998796	no
ENSG00000022267	ENSG00000022267	FHL1	chrX:136146701-136211359	Control	TC32	OK	4.95441	0.873077	-2.50453	-2.52314	0.00045	0.0447046	yes
ENSG00000022277	ENSG00000022277	RTF2	chr20:56468584-56526142	Control	TC32	OK	67.1131	78.9892	0.23506	0.514095	0.54245	0.998796	no
ENSG00000022567	ENSG00000022567	SLC45A4	chr8:141207165-141308305	Control	TC32	OK	23.667	15.8105	-0.581997	-0.998704	0.20525	0.998796	no
ENSG00000022840	ENSG00000022840	RNF10	chr12:120503273-120577594	Control	TC32	OK	128.263	111.704	-0.199424	-0.370362	0.6645	0.998796	no
ENSG00000022976	ENSG00000022976	ZNF839	chr14:102317376-102362916	Control	TC32	OK	5.60445	4.76085	-0.235352	-0.354446	0.657	0.998796	no
ENSG00000023041	ENSG00000023041	ZDHHC6	chr10:112374017-112446917	Control	TC32	OK	24.3636	32.6526	0.422472	0.656879	0.37365	0.998796	no
ENSG00000023171	ENSG00000023171	GRAMD1B	chr11:123358427-123627774	Control	TC32	OK	6.05699	3.83044	-0.661091	-0.614874	0.38005	0.998796	no
ENSG00000023191	ENSG00000023191	RNH1	chr11:494511-507300	Control	TC32	OK	74.3859	62.3631	-0.254336	-0.739201	0.37285	0.998796	no
ENSG00000023228	ENSG00000023228	NDUFS1	chr2:206114816-206162928	Control	TC32	OK	14.3334	16.0577	0.16389	0.251534	0.72735	0.998796	no
ENSG00000023287	ENSG00000023287	RB1CC1	chr8:52622455-52745843	Control	TC32	OK	14.9151	14.9333	0.00175856	0.00201764	0.9978	0.999252	no
ENSG00000023318	ENSG00000023318	ERP44	chr9:99979178-100099040	Control	TC32	OK	10.0995	10.053	-0.00666527	-0.0190812	0.98315	0.998796	no
ENSG00000023330	ENSG00000023330	ALAS1	chr3:52198085-52214327	Control	TC32	OK	217.612	189.228	-0.201634	-0.402156	0.5919	0.998796	no
ENSG00000023445	ENSG00000023445	BIRC3	chr11:102317449-102339403	Control	TC32	OK	6.48225	34.4345	2.40929	4.35443	5e-05	0.00772968	yes
ENSG00000023516	ENSG00000023516	AKAP11	chr13:42272152-42323267	Control	TC32	OK	9.11104	10.808	0.246408	0.76589	0.3833	0.998796	no
ENSG00000023572	ENSG00000023572	GLRX2	chr1:193012249-193106114	Control	TC32	OK	14.4686	18.1701	0.328636	0.308006	0.71925	0.998796	no
ENSG00000023697	ENSG00000023697	DERA	chr12:15911171-16037282	Control	TC32	OK	26.9675	33.4963	0.312778	0.684287	0.4098	0.998796	no
ENSG00000023734	ENSG00000023734	STRAP	chr12:15882390-15903478	Control	TC32	OK	33.1225	36.4645	0.13868	0.322353	0.7023	0.998796	no
ENSG00000023892	ENSG00000023892	DEF6	chr6:35297851-35321771	Control	TC32	OK	11.8864	6.1745	-0.944917	-1.58449	0.0418	0.752426	no
ENSG00000023902	ENSG00000023902	PLEKHO1	chr1:150149182-150164720	Control	TC32	OK	110.629	200.741	0.859612	2.23909	0.0087	0.307092	no
ENSG00000023909	ENSG00000023909	GCLM	chr1:93885204-93909456	Control	TC32	OK	5.47658	7.32337	0.419234	0.589637	0.4022	0.998796	no
ENSG00000024048	ENSG00000024048	UBR2	chr6:42564061-42693504	Control	TC32	OK	10.6352	12.1723	0.194756	0.513048	0.54175	0.998796	no
ENSG00000024862	ENSG00000024862	CCDC28A	chr6:138725210-138793319	Control	TC32	OK	13.3566	13.8803	0.0554889	0.131038	0.87825	0.998796	no
ENSG00000025039	ENSG00000025039	RRAGD	chr6:89364635-89412270	Control	TC32	OK	68.7512	60.2606	-0.19017	-0.406601	0.6259	0.998796	no
ENSG00000025293	ENSG00000025293	PHF20	chr20:35771973-35950381	Control	TC32	OK	48.8619	38.3161	-0.350759	-0.55981	0.5078	0.998796	no
ENSG00000025434	ENSG00000025434	NR1H3	chr11:47239301-47269032	Control	TC32	OK	76.6689	119.713	0.642871	1.10391	0.19965	0.998796	no
ENSG00000025708	ENSG00000025708	TYMP	chr22:50523567-50532580	Control	TC32	OK	42.378	58.4749	0.464501	1.31777	0.1231	0.998796	no
ENSG00000025770	ENSG00000025770	NCAPH2	chr22:50508215-50523472	Control	TC32	OK	9.91139	10.4296	0.0735317	0.116476	0.8879	0.998796	no
ENSG00000025772	ENSG00000025772	TOMM34	chr20:44910061-44960486	Control	TC32	OK	3.77466	5.8767	0.63866	0.904325	0.2896	0.998796	no
ENSG00000025796	ENSG00000025796	SEC63	chr6:107867755-107959986	Control	TC32	OK	37.0394	38.6449	0.0612156	0.100311	0.9073	0.998796	no
ENSG00000025800	ENSG00000025800	KPNA6	chr1:32108037-32176568	Control	TC32	OK	16.7455	16.7419	-0.00030973	-0.000934058	0.9988	0.999472	no
ENSG00000026025	ENSG00000026025	VIM	chr10:17214238-17237593	Control	TC32	OK	2508.37	1874.49	-0.420257	-0.791762	0.32775	0.998796	no
ENSG00000026036	ENSG00000026036	RTEL1-TNFRSF6B	chr20:63657809-63743505	Control	TC32	OK	5.73236	6.14218	0.0996211	0.15333	0.8611	0.998796	no
ENSG00000026103	ENSG00000026103	FAS	chr10:88879733-89015785	Control	TC32	OK	25.3312	23.9676	-0.0798283	-0.145683	0.85955	0.998796	no
ENSG00000026297	ENSG00000026297	RNASET2	chr6:166409363-166957191	Control	TC32	OK	41.4657	16.2645	-1.35019	-1.65956	0.04265	0.755877	no
ENSG00000026508	ENSG00000026508	CD44	chr11:35138869-35232402	Control	TC32	OK	795.578	1480.9	0.896395	1.59821	0.0554	0.824695	no
ENSG00000026652	ENSG00000026652	AGPAT4	chr6:161129978-161274061	Control	TC32	OK	29.353	24.4479	-0.263797	-0.354756	0.65775	0.998796	no
ENSG00000026751	ENSG00000026751	SLAMF7	chr1:160739056-160754821	Control	TC32	OK	44.2494	95.2934	1.10672	2.77982	0.00195	0.129592	no
ENSG00000026950	ENSG00000026950	BTN3A1	chr6:26402236-26415216	Control	TC32	OK	16.6094	11.6782	-0.508189	-1.05931	0.19025	0.998796	no
ENSG00000027001	ENSG00000027001	MIPEP	chr13:23730188-23902655	Control	TC32	OK	11.9374	6.13994	-0.959187	-1.43913	0.0919	0.971203	no
ENSG00000027075	ENSG00000027075	PRKCH	chr14:61187558-61658696	Control	TC32	OK	6.88507	5.94944	-0.210718	-0.227612	0.7828	0.998796	no
ENSG00000027697	ENSG00000027697	IFNGR1	chr6:137197483-137219449	Control	TC32	OK	251.457	194.574	-0.369995	-1.13774	0.1675	0.998796	no
ENSG00000027847	ENSG00000027847	B4GALT7	chr5:177600099-177610347	Control	TC32	OK	15.5522	13.6453	-0.188716	-0.322466	0.65485	0.998796	no
ENSG00000028116	ENSG00000028116	VRK2	chr2:57907650-58241686	Control	TC32	OK	7.73558	11.2468	0.539929	1.0072	0.2299	0.998796	no
ENSG00000028137	ENSG00000028137	TNFRSF1B	chr1:12166942-12209228	Control	TC32	OK	67.0658	74.2716	0.147234	0.35776	0.6057	0.998796	no
ENSG00000028203	ENSG00000028203	VEZT	chr12:95217745-95302790	Control	TC32	OK	16.8906	23.6916	0.488156	0.911843	0.2896	0.998796	no
ENSG00000028277	ENSG00000028277	POU2F2	chr19:42086109-42196585	Control	TC32	OK	2.97513	16.8731	2.5037	3.43132	5e-05	0.00772968	yes
ENSG00000028310	ENSG00000028310	BRD9	chr5:795605-919357	Control	TC32	OK	23.3492	25.3758	0.120081	0.225567	0.7829	0.998796	no
ENSG00000028528	ENSG00000028528	SNX1	chr15:64094122-64146090	Control	TC32	OK	76.2591	56.494	-0.432811	-0.833304	0.2857	0.998796	no
ENSG00000028839	ENSG00000028839	TBPL1	chr6:133952169-134052636	Control	TC32	OK	4.4508	5.88046	0.401865	0.43284	0.592	0.998796	no
ENSG00000029153	ENSG00000029153	ARNTL2	chr12:27332853-27446625	Control	TC32	OK	5.25107	18.3978	1.80885	3.86522	5e-05	0.00772968	yes
ENSG00000029363	ENSG00000029363	BCLAF1	chr6:136256626-136289851	Control	TC32	OK	44.271	38.3668	-0.206506	-0.279689	0.67175	0.998796	no
ENSG00000029364	ENSG00000029364	SLC39A9	chr14:69380122-69462388	Control	TC32	OK	27.787	33.9807	0.290307	0.653007	0.39975	0.998796	no
ENSG00000029639	ENSG00000029639	TFB1M	chr6:154733324-155314493	Control	TC32	OK	8.33429	10.0828	0.274771	0.158014	0.80665	0.998796	no
ENSG00000029725	ENSG00000029725	RABEP1	chr17:5282264-5469060	Control	TC32	OK	42.2011	47.2286	0.162379	0.206703	0.73925	0.998796	no
ENSG00000030066	ENSG00000030066	NUP160	chr11:47778086-47848555	Control	TC32	OK	13.2944	15.8121	0.250215	0.243773	0.7725	0.998796	no
ENSG00000030110	ENSG00000030110	BAK1	chr6:33540045-33593338	Control	TC32	OK	16.5275	13.4096	-0.3016	-0.819726	0.3357	0.998796	no
ENSG00000030582	ENSG00000030582	GRN	chr17:44345085-44353102	Control	TC32	OK	1979.56	1135.8	-0.801467	-1.52364	0.08485	0.944888	no
ENSG00000031003	ENSG00000031003	FAM13B	chr5:137814332-138051961	Control	TC32	OK	23.0671	21.4575	-0.104355	-0.152247	0.8578	0.998796	no
ENSG00000031081	ENSG00000031081	ARHGAP31	chr3:119294372-119420714	Control	TC32	OK	35.5474	65.027	0.871295	1.43641	0.0145	0.425132	no
ENSG00000031698	ENSG00000031698	SARS	chr1:109213917-109238169	Control	TC32	OK	108.624	114.532	0.0764079	0.22189	0.7919	0.998796	no
ENSG00000031823	ENSG00000031823	RANBP3	chr19:5916138-5978142	Control	TC32	OK	42.5326	29.4014	-0.532687	-0.81775	0.31275	0.998796	no
ENSG00000032219	ENSG00000032219	ARID4A	chr14:58298384-58395641	Control	TC32	OK	22.8016	20.3465	-0.164356	-0.236939	0.7699	0.998796	no
ENSG00000032389	ENSG00000032389	EIPR1	chr2:3188924-3377882	Control	TC32	OK	16.916	17.2913	0.0316579	0.0559088	0.9449	0.998796	no
ENSG00000032444	ENSG00000032444	PNPLA6	chr19:7522625-7561764	Control	TC32	OK	404.042	183.616	-1.13782	-2.26377	0.0117	0.376235	no
ENSG00000032742	ENSG00000032742	IFT88	chr13:20567068-20691437	Control	TC32	OK	3.63273	2.51511	-0.530432	-0.502473	0.4439	0.998796	no
ENSG00000033011	ENSG00000033011	ALG1	chr16:4882506-5097808	Control	TC32	OK	8.29394	10.8912	0.393028	0.315341	0.7404	0.998796	no
ENSG00000033030	ENSG00000033030	ZCCHC8	chr12:122471599-122501073	Control	TC32	OK	20.8914	20.9444	0.00365559	0.00828117	0.99245	0.998826	no
ENSG00000033050	ENSG00000033050	ABCF2	chr7:151207836-151227230	Control	TC32	OK	9.50335	11.212	0.238534	0.33959	0.62795	0.998796	no
ENSG00000033100	ENSG00000033100	CHPF2	chr7:151232488-151277896	Control	TC32	OK	17.5602	13.3726	-0.393023	-0.754455	0.35605	0.998796	no
ENSG00000033178	ENSG00000033178	UBA6	chr4:67612651-67701179	Control	TC32	OK	10.6423	14.9118	0.486644	0.61781	0.4622	0.998796	no
ENSG00000033327	ENSG00000033327	GAB2	chr11:78215296-78574874	Control	TC32	OK	32.3989	19.9769	-0.697618	-1.48335	0.0285	0.637699	no
ENSG00000033627	ENSG00000033627	ATP6V0A1	chr17:42458843-42522611	Control	TC32	OK	181.378	167.428	-0.115458	-0.199619	0.8171	0.998796	no
ENSG00000033800	ENSG00000033800	PIAS1	chr15:68054178-68257211	Control	TC32	OK	57.3486	53.1978	-0.108393	-0.138591	0.8673	0.998796	no
ENSG00000033867	ENSG00000033867	SLC4A7	chr3:27372720-27484420	Control	TC32	OK	17.434	32.5306	0.899893	1.47394	0.07585	0.903853	no
ENSG00000034152	ENSG00000034152	MAP2K3	chr17:21284671-21315240	Control	TC32	OK	23.4615	39.025	0.734101	1.46101	0.0763	0.906439	no
ENSG00000034510	ENSG00000034510	TMSB10	chr2:84821649-84907008	Control	TC32	OK	2363.52	2894.28	0.292266	0.897161	0.2933	0.998796	no
ENSG00000034533	ENSG00000034533	ASTE1	chr3:130850594-131381475	Control	TC32	OK	6.07158	4.61409	-0.396028	-0.291106	0.67595	0.998796	no
ENSG00000034677	ENSG00000034677	RNF19A	chr8:100157905-100336218	Control	TC32	OK	42.0409	42.8792	0.0284847	0.0408089	0.96025	0.998796	no
ENSG00000034693	ENSG00000034693	PEX3	chr6:143450806-143511690	Control	TC32	OK	6.73566	5.26067	-0.356573	-0.177742	0.8393	0.998796	no
ENSG00000034713	ENSG00000034713	GABARAPL2	chr16:75528531-75623300	Control	TC32	OK	45.23	47.0207	0.0560166	0.10097	0.906	0.998796	no
ENSG00000035115	ENSG00000035115	SH3YL1	chr2:217729-278283	Control	TC32	OK	11.8875	7.03823	-0.756158	-0.861387	0.2104	0.998796	no
ENSG00000035141	ENSG00000035141	FAM136A	chr2:70295974-70302090	Control	TC32	OK	21.0035	22.4047	0.0931673	0.254052	0.76025	0.998796	no
ENSG00000035403	ENSG00000035403	VCL	chr10:73995192-74151063	Control	TC32	OK	66.7341	37.8245	-0.819101	-1.18301	0.04845	0.796724	no
ENSG00000035681	ENSG00000035681	NSMAF	chr8:58583503-58659844	Control	TC32	OK	86.4588	110.833	0.358297	0.85477	0.3315	0.998796	no
ENSG00000035687	ENSG00000035687	ADSS	chr1:244352634-244452134	Control	TC32	OK	13.7578	15.9054	0.209275	0.365321	0.66425	0.998796	no
ENSG00000035862	ENSG00000035862	TIMP2	chr17:78852976-78925387	Control	TC32	OK	142.258	107.633	-0.40239	-1.15591	0.1735	0.998796	no
ENSG00000035928	ENSG00000035928	RFC1	chr4:39287455-39366375	Control	TC32	OK	27.0134	25.4464	-0.0862117	-0.108961	0.8932	0.998796	no
ENSG00000036054	ENSG00000036054	TBC1D23	chr3:100260999-100325251	Control	TC32	OK	22.2976	19.8033	-0.171149	-0.284581	0.728	0.998796	no
ENSG00000036257	ENSG00000036257	CUL3	chr2:224464681-224585397	Control	TC32	OK	39.2044	39.9542	0.027332	0.0519329	0.94795	0.998796	no
ENSG00000036549	ENSG00000036549	AC118549.1	chr1:77562415-77683419	Control	TC32	OK	27.1576	19.8829	-0.449829	-0.726434	0.33495	0.998796	no
ENSG00000037042	ENSG00000037042	TUBG2	chr17:42659304-42667006	Control	TC32	OK	4.55704	4.18032	-0.124482	-0.199188	0.81455	0.998796	no
ENSG00000037241	ENSG00000037241	RPL26L1	chr5:172954785-172969771	Control	TC32	OK	5.84448	7.26449	0.313786	0.451154	0.60585	0.998796	no
ENSG00000037474	ENSG00000037474	NSUN2	chr5:6599238-6633291	Control	TC32	OK	31.3028	30.3311	-0.0454924	-0.0895931	0.9185	0.998796	no
ENSG00000037637	ENSG00000037637	FBXO42	chr1:16246838-16352454	Control	TC32	OK	16.4835	19.6975	0.256987	0.456556	0.58485	0.998796	no
ENSG00000037749	ENSG00000037749	MFAP3	chr5:153990127-154445850	Control	TC32	OK	14.5345	16.9811	0.224448	0.291995	0.69565	0.998796	no
ENSG00000037757	ENSG00000037757	MRI1	chr19:13764531-13778462	Control	TC32	OK	9.05725	7.20278	-0.330519	-0.453558	0.5655	0.998796	no
ENSG00000037897	ENSG00000037897	METTL1	chr12:57762333-57818704	Control	TC32	OK	32.9787	42.172	0.35475	0.414902	0.6608	0.998796	no
ENSG00000038002	ENSG00000038002	AGA	chr4:177430769-177442503	Control	TC32	OK	19.5494	22.387	0.195538	0.394681	0.63995	0.998796	no
ENSG00000038210	ENSG00000038210	PI4K2B	chr4:25160640-25279092	Control	TC32	OK	5.50247	3.08304	-0.835724	-1.81331	0.03295	0.678456	no
ENSG00000038219	ENSG00000038219	BOD1L1	chr4:13568737-13627723	Control	TC32	OK	31.7925	34.8735	0.133443	0.0664524	0.8362	0.998796	no
ENSG00000038274	ENSG00000038274	MAT2B	chr5:163503113-163519336	Control	TC32	OK	39.3341	49.488	0.3313	0.700496	0.39735	0.998796	no
ENSG00000038358	ENSG00000038358	EDC4	chr16:67873022-67888855	Control	TC32	OK	41.7029	37.861	-0.139434	-0.268256	0.75345	0.998796	no
ENSG00000038382	ENSG00000038382	TRIO	chr5:14143701-14532128	Control	TC32	OK	155.397	162.937	0.0683552	0.122394	0.8928	0.998796	no
ENSG00000038532	ENSG00000038532	CLEC16A	chr16:10944487-11182189	Control	TC32	OK	22.4998	20.7565	-0.116351	-0.188462	0.7944	0.998796	no
ENSG00000038945	ENSG00000038945	MSR1	chr8:16107877-16567490	Control	TC32	OK	11.2121	1.7098	-2.71315	-3.63358	0.0001	0.0140335	yes
ENSG00000039068	ENSG00000039068	CDH1	chr16:68737224-68835548	Control	TC32	OK	21.8602	0.912585	-4.5822	-2.73734	0.00565	0.240908	no
ENSG00000039123	ENSG00000039123	MTREX	chr5:55307759-55535050	Control	TC32	OK	35.0408	29.5336	-0.246678	-0.352225	0.66415	0.998796	no
ENSG00000039319	ENSG00000039319	ZFYVE16	chr5:80408012-80479350	Control	TC32	OK	155.496	290.876	0.903526	1.73779	0.0183	0.48849	no
ENSG00000039523	ENSG00000039523	RIPOR1	chr16:67517861-67546788	Control	TC32	OK	74.965	61.0664	-0.295839	-0.607808	0.4631	0.998796	no
ENSG00000039560	ENSG00000039560	RAI14	chr5:34656236-34832627	Control	TC32	OK	3.50292	14.16	2.01519	1.37843	0.0145	0.425132	no
ENSG00000039650	ENSG00000039650	PNKP	chr19:49818278-49888749	Control	TC32	OK	71.5841	52.0737	-0.459086	-0.494025	0.597	0.998796	no
ENSG00000040199	ENSG00000040199	PHLPP2	chr16:71623707-71724701	Control	TC32	OK	4.38794	5.38004	0.294073	0.409174	0.48715	0.998796	no
ENSG00000040275	ENSG00000040275	SPDL1	chr5:169583633-169604778	Control	TC32	OK	4.19169	3.53198	-0.247053	-0.317429	0.6475	0.998796	no
ENSG00000040341	ENSG00000040341	STAU2	chr8:73420003-73878910	Control	TC32	OK	9.20258	9.33298	0.0202992	0.0100357	0.9825	0.998796	no
ENSG00000040487	ENSG00000040487	PQLC2	chr1:19312325-19329300	Control	TC32	OK	22.316	24.2829	0.121862	0.316731	0.7061	0.998796	no
ENSG00000040531	ENSG00000040531	CTNS	chr17:3636467-3661542	Control	TC32	OK	39.5042	32.4235	-0.284963	-0.550782	0.4905	0.998796	no
ENSG00000040608	ENSG00000040608	RTN4R	chr22:20241414-20283246	Control	TC32	OK	25.1248	6.26381	-2.004	-4.13829	5e-05	0.00772968	yes
ENSG00000040633	ENSG00000040633	PHF23	chr17:7235027-7239722	Control	TC32	OK	31.4036	25.964	-0.274415	-0.669664	0.40335	0.998796	no
ENSG00000040933	ENSG00000040933	INPP4A	chr2:98444853-98594390	Control	TC32	OK	16.9855	13.7975	-0.299889	-0.47742	0.56065	0.998796	no
ENSG00000041357	ENSG00000041357	PSMA4	chr15:78540404-78552419	Control	TC32	OK	83.984	126.837	0.594789	1.61575	0.06445	0.880106	no
ENSG00000041802	ENSG00000041802	LSG1	chr3:194584010-194672477	Control	TC32	OK	20.8204	23.5863	0.179948	0.30893	0.7043	0.998796	no
ENSG00000041880	ENSG00000041880	PARP3	chr3:51942344-51948867	Control	TC32	OK	7.57805	8.79042	0.214104	0.328451	0.6916	0.998796	no
ENSG00000041982	ENSG00000041982	TNC	chr9:115019577-115118257	Control	TC32	OK	0.380036	8.55848	4.49314	2.70205	0.0019	0.126852	no
ENSG00000041988	ENSG00000041988	THAP3	chr1:6624865-6701924	Control	TC32	OK	7.1558	5.78469	-0.306873	-0.283943	0.70715	0.998796	no
ENSG00000042062	ENSG00000042062	RIPOR3	chr20:50586107-50691528	Control	TC32	OK	2.82897	3.6476	0.36667	0.487533	0.55535	0.998796	no
ENSG00000042088	ENSG00000042088	TDP1	chr14:89954938-90044768	Control	TC32	OK	14.4593	12.2641	-0.237559	-0.411031	0.64795	0.998796	no
ENSG00000042286	ENSG00000042286	AIFM2	chr10:70052795-70132934	Control	TC32	OK	10.5385	14.8279	0.492648	0.996438	0.22585	0.998796	no
ENSG00000042429	ENSG00000042429	MED17	chr11:93661638-93814963	Control	TC32	OK	17.0765	14.6227	-0.223802	-0.203035	0.77165	0.998796	no
ENSG00000042445	ENSG00000042445	RETSAT	chr2:85342087-85391752	Control	TC32	OK	12.826	11.2466	-0.189587	-0.279498	0.71415	0.998796	no
ENSG00000042493	ENSG00000042493	CAPG	chr2:85394747-85418432	Control	TC32	OK	1304.52	1173.77	-0.152368	-0.412685	0.61845	0.998796	no
ENSG00000042753	ENSG00000042753	AP2S1	chr19:46838135-46850992	Control	TC32	OK	224.766	259.871	0.209367	0.560307	0.51695	0.998796	no
ENSG00000043093	ENSG00000043093	DCUN1D1	chr3:182938073-182985953	Control	TC32	OK	9.54618	10.8621	0.186304	0.312441	0.66315	0.998796	no
ENSG00000043143	ENSG00000043143	JADE2	chr5:134524311-134583230	Control	TC32	OK	18.9656	11.4782	-0.724487	-1.17201	0.136	0.998796	no
ENSG00000043462	ENSG00000043462	LCP2	chr5:170232446-170298227	Control	TC32	OK	70.1009	60.8152	-0.205001	-0.411525	0.6352	0.998796	no
ENSG00000043514	ENSG00000043514	TRIT1	chr1:39841021-39883511	Control	TC32	OK	12.2393	8.01521	-0.61071	-0.917264	0.2612	0.998796	no
ENSG00000044090	ENSG00000044090	CUL7	chr6:43037616-43075099	Control	TC32	OK	8.4489	6.57686	-0.361363	-0.598701	0.39095	0.998796	no
ENSG00000044115	ENSG00000044115	CTNNA1	chr5:138610966-138935034	Control	TC32	OK	187.307	212.381	0.181249	0.346959	0.6822	0.998796	no
ENSG00000044446	ENSG00000044446	PHKA2	chrX:18890295-18984598	Control	TC32	OK	24.2295	17.0779	-0.504633	-0.717793	0.3553	0.998796	no
ENSG00000044459	ENSG00000044459	CNTLN	chr9:17134981-17503923	Control	TC32	OK	4.6693	4.38316	-0.0912351	-0.18139	0.83565	0.998796	no
ENSG00000044574	ENSG00000044574	HSPA5	chr9:125234852-125241330	Control	TC32	OK	98.1945	111.496	0.183282	0.599883	0.48595	0.998796	no
ENSG00000046647	ENSG00000046647	GEMIN8	chrX:14008278-14029893	Control	TC32	OK	2.39128	3.33643	0.480521	0.612768	0.4621	0.998796	no
ENSG00000046651	ENSG00000046651	OFD1	chrX:13734744-13769353	Control	TC32	OK	6.00879	3.83684	-0.647156	-0.837968	0.26455	0.998796	no
ENSG00000047056	ENSG00000047056	WDR37	chr10:1049537-1132297	Control	TC32	OK	25.6444	15.7813	-0.700424	-1.52786	0.0526	0.813921	no
ENSG00000047188	ENSG00000047188	YTHDC2	chr5:113513682-113595285	Control	TC32	OK	13.8324	13.7106	-0.0127573	-0.016676	0.982	0.998796	no
ENSG00000047249	ENSG00000047249	ATP6V1H	chr8:53715556-53843558	Control	TC32	OK	73.8969	94.5346	0.355329	0.829078	0.3222	0.998796	no
ENSG00000047315	ENSG00000047315	POLR2B	chr4:56907875-57205510	Control	TC32	OK	77.239	84.5945	0.131234	0.165832	0.8452	0.998796	no
ENSG00000047346	ENSG00000047346	FAM214A	chr15:52577841-52709817	Control	TC32	OK	14.3177	8.80347	-0.701657	-1.11568	0.1525	0.998796	no
ENSG00000047365	ENSG00000047365	ARAP2	chr4:35948220-36274220	Control	TC32	OK	44.0604	62.1461	0.49618	0.732253	0.3546	0.998796	no
ENSG00000047410	ENSG00000047410	TPR	chr1:186296278-186375693	Control	TC32	OK	51.8262	46.0435	-0.170682	-0.239768	0.7517	0.998796	no
ENSG00000047457	ENSG00000047457	CP	chr3:149129583-149222055	Control	TC32	OK	3.83229	1.57103	-1.28649	-0.553073	0.29845	0.998796	no
ENSG00000047578	ENSG00000047578	KIAA0556	chr16:27550132-27780369	Control	TC32	OK	23.2791	14.7993	-0.653503	-0.783541	0.40855	0.998796	no
ENSG00000047579	ENSG00000047579	DTNBP1	chr6:15522800-15663058	Control	TC32	OK	12.4656	16.6899	0.421025	0.942748	0.27725	0.998796	no
ENSG00000047621	ENSG00000047621	C12orf4	chr12:4487727-4538508	Control	TC32	OK	17.6347	15.7217	-0.165662	-0.30747	0.66305	0.998796	no
ENSG00000047634	ENSG00000047634	SCML1	chrX:17737448-17754988	Control	TC32	OK	7.37525	6.53036	-0.17553	-0.291825	0.72665	0.998796	no
ENSG00000047644	ENSG00000047644	WWC3	chrX:10015561-10144478	Control	TC32	OK	4.59821	4.32701	-0.0877038	-0.146513	0.79845	0.998796	no
ENSG00000047849	ENSG00000047849	MAP4	chr3:47850689-48089272	Control	TC32	OK	31.5534	41.5852	0.398276	0.59136	0.26835	0.998796	no
ENSG00000047932	ENSG00000047932	GOPC	chr6:117288299-117602542	Control	TC32	OK	7.16071	5.88546	-0.282948	-0.713418	0.4067	0.998796	no
ENSG00000048028	ENSG00000048028	USP28	chr11:113797873-113875570	Control	TC32	OK	18.3289	13.1686	-0.47702	-0.780033	0.34905	0.998796	no
ENSG00000048052	ENSG00000048052	HDAC9	chr7:18086948-19002416	Control	TC32	OK	5.38749	3.16004	-0.769672	-0.902606	0.2114	0.998796	no
ENSG00000048140	ENSG00000048140	TSPAN17	chr5:176647386-176659054	Control	TC32	OK	30.361	22.8787	-0.408212	-1.10623	0.1648	0.998796	no
ENSG00000048162	ENSG00000048162	NOP16	chr5:176365467-176416569	Control	TC32	OK	25.9632	31.5428	0.280842	0.306719	0.72695	0.998796	no
ENSG00000048342	ENSG00000048342	CC2D2A	chr4:15469864-15601557	Control	TC32	OK	5.46498	4.07923	-0.421919	-0.425501	0.616	0.998796	no
ENSG00000048392	ENSG00000048392	RRM2B	chr8:102204501-102239118	Control	TC32	OK	34.5046	50.6867	0.554818	0.890767	0.27165	0.998796	no
ENSG00000048405	ENSG00000048405	ZNF800	chr7:127346789-127431924	Control	TC32	OK	19.133	22.3132	0.221835	0.413014	0.59465	0.998796	no
ENSG00000048471	ENSG00000048471	SNX29	chr16:11976736-12611044	Control	TC32	OK	38.8424	25.8104	-0.589679	-0.959491	0.13955	0.998796	no
ENSG00000048544	ENSG00000048544	MRPS10	chr6:42206800-42217865	Control	TC32	OK	11.2395	12.6215	0.167306	0.438614	0.61215	0.998796	no
ENSG00000048649	ENSG00000048649	RSF1	chr11:77659995-77821017	Control	TC32	OK	29.7715	26.9477	-0.143773	-0.20537	0.789	0.998796	no
ENSG00000048707	ENSG00000048707	VPS13D	chr1:12230031-12512047	Control	TC32	OK	48.7705	50.2951	0.0444068	0.0433629	0.9431	0.998796	no
ENSG00000048740	ENSG00000048740	CELF2	chr10:10798396-11336675	Control	TC32	OK	28.5869	23.0636	-0.309732	-0.639122	0.4498	0.998796	no
ENSG00000048828	ENSG00000048828	FAM120A	chr9:93446493-93566107	Control	TC32	OK	100.077	110.611	0.144377	0.348026	0.67815	0.998796	no
ENSG00000048991	ENSG00000048991	R3HDM1	chr2:135531454-135725270	Control	TC32	OK	23.0082	18.4476	-0.318717	-0.498811	0.55865	0.998796	no
ENSG00000049089	ENSG00000049089	COL9A2	chr1:40300486-40317813	Control	TC32	OK	6.3637	1.34998	-2.23692	-2.31856	0.00315	0.175122	no
ENSG00000049167	ENSG00000049167	ERCC8	chr5:60873830-60945073	Control	TC32	OK	9.85819	11.0211	0.160874	0.216058	0.79975	0.998796	no
ENSG00000049239	ENSG00000049239	H6PD	chr1:9234774-9271337	Control	TC32	OK	45.1032	34.2482	-0.3972	-1.13915	0.1765	0.998796	no
ENSG00000049245	ENSG00000049245	VAMP3	chr1:7771268-7781432	Control	TC32	OK	100.024	76.4853	-0.387094	-0.613298	0.39075	0.998796	no
ENSG00000049246	ENSG00000049246	PER3	chr1:7784319-7853512	Control	TC32	OK	34.6435	22.6538	-0.61283	-0.965525	0.21715	0.998796	no
ENSG00000049449	ENSG00000049449	RCN1	chr11:31509699-32105755	Control	TC32	OK	14.0672	21.2304	0.593794	0.990318	0.19885	0.998796	no
ENSG00000049541	ENSG00000049541	RFC2	chr7:74231498-74254458	Control	TC32	OK	6.78825	8.86743	0.385477	0.64274	0.4016	0.998796	no
ENSG00000049618	ENSG00000049618	ARID1B	chr6:156776359-157210779	Control	TC32	OK	57.5425	57.9236	0.00952307	0.0175543	0.98025	0.998796	no
ENSG00000049656	ENSG00000049656	CLPTM1L	chr5:1317743-1345099	Control	TC32	OK	38.9567	39.1981	0.00890897	0.0186222	0.98235	0.998796	no
ENSG00000049759	ENSG00000049759	NEDD4L	chr18:58044366-58401540	Control	TC32	OK	29.4865	61.4656	1.05972	1.97002	0.0205	0.529611	no
ENSG00000049860	ENSG00000049860	HEXB	chr5:74627405-74867854	Control	TC32	OK	690	461.992	-0.578728	-1.24814	0.14225	0.998796	no
ENSG00000049883	ENSG00000049883	PTCD2	chr5:72219408-72368395	Control	TC32	OK	2.86489	2.24474	-0.351928	-0.290448	0.6801	0.998796	no
ENSG00000050130	ENSG00000050130	JKAMP	chr14:59429021-59576831	Control	TC32	OK	29.6232	33.5908	0.181338	0.379121	0.6552	0.998796	no
ENSG00000050344	ENSG00000050344	NFE2L3	chr7:26152239-26187125	Control	TC32	OK	7.77904	14.2666	0.874982	1.16807	0.0614	0.862494	no
ENSG00000050393	ENSG00000050393	MCUR1	chr6:13786556-13814568	Control	TC32	OK	5.05655	5.6989	0.172532	0.442717	0.6002	0.998796	no
ENSG00000050405	ENSG00000050405	LIMA1	chr12:50175787-50283546	Control	TC32	OK	21.9806	20.701	-0.0865286	-0.128676	0.8585	0.998796	no
ENSG00000050426	ENSG00000050426	LETMD1	chr12:51047961-51060424	Control	TC32	OK	34.2663	46.6207	0.444181	0.951708	0.26385	0.998796	no
ENSG00000050438	ENSG00000050438	SLC4A8	chr12:51351246-51515763	Control	TC32	OK	4.22077	6.32292	0.583085	0.197174	0.55535	0.998796	no
ENSG00000050730	ENSG00000050730	TNIP3	chr4:121131407-121227466	Control	TC32	OK	0.926644	49.5782	5.74155	7.34613	5e-05	0.00772968	yes
ENSG00000050748	ENSG00000050748	MAPK9	chr5:180233142-180292099	Control	TC32	OK	11.067	8.99768	-0.298641	-0.555254	0.4871	0.998796	no
ENSG00000050820	ENSG00000050820	BCAR1	chr16:75218999-75268053	Control	TC32	OK	11.2125	5.99635	-0.902955	-1.32599	0.09415	0.975356	no
ENSG00000051009	ENSG00000051009	FAM160A2	chr11:6211334-6234711	Control	TC32	OK	17.3823	20.1038	0.209848	0.475358	0.5571	0.998796	no
ENSG00000051108	ENSG00000051108	HERPUD1	chr16:56932047-56944863	Control	TC32	OK	161.643	85.7882	-0.913955	-2.07008	0.0172	0.472657	no
ENSG00000051128	ENSG00000051128	HOMER3	chr19:18899513-18946831	Control	TC32	OK	17.4607	9.10127	-0.93997	-0.85968	0.3458	0.998796	no
ENSG00000051382	ENSG00000051382	PIK3CB	chr3:138652698-138834938	Control	TC32	OK	46.3607	43.0804	-0.105871	-0.177602	0.8327	0.998796	no
ENSG00000051523	ENSG00000051523	CYBA	chr16:88643282-88651152	Control	TC32	OK	290.261	205.13	-0.500808	-1.48094	0.08035	0.922493	no
ENSG00000051596	ENSG00000051596	THOC3	chr5:175906938-176034680	Control	TC32	OK	9.22695	6.99633	-0.399255	-0.63562	0.4333	0.998796	no
ENSG00000051620	ENSG00000051620	HEBP2	chr6:138402584-138697288	Control	TC32	OK	12.5134	5.98876	-1.06315	-0.834008	0.30695	0.998796	no
ENSG00000051825	ENSG00000051825	MPHOSPH9	chr12:123152319-123272334	Control	TC32	OK	16.2729	17.5221	0.1067	0.123578	0.8638	0.998796	no
ENSG00000052126	ENSG00000052126	PLEKHA5	chr12:19129751-19376400	Control	TC32	OK	4.44361	4.21197	-0.0772386	-0.143874	0.84685	0.998796	no
ENSG00000052723	ENSG00000052723	SIKE1	chr1:114769478-114780685	Control	TC32	OK	11.38	10.2396	-0.152341	-0.16709	0.82095	0.998796	no
ENSG00000052749	ENSG00000052749	RRP12	chr10:97356357-97426076	Control	TC32	OK	15.9801	17.2823	0.113014	0.192983	0.79515	0.998796	no
ENSG00000052795	ENSG00000052795	FNIP2	chr4:158769137-159038760	Control	TC32	OK	55.6201	58.469	0.0720661	0.140589	0.82145	0.998796	no
ENSG00000052802	ENSG00000052802	MSMO1	chr4:165327622-165343160	Control	TC32	OK	40.2255	43.8085	0.1231	0.308448	0.7124	0.998796	no
ENSG00000052841	ENSG00000052841	TTC17	chr11:43311962-43494933	Control	TC32	OK	79.5457	80.5009	0.0172223	0.025861	0.9749	0.998796	no
ENSG00000053254	ENSG00000053254	FOXN3	chr14:89124870-89954777	Control	TC32	OK	49.3507	66.2875	0.425666	0.527562	0.21065	0.998796	no
ENSG00000053371	ENSG00000053371	AKR7A2	chr1:19303964-19312146	Control	TC32	OK	11.8832	11.1729	-0.0889256	-0.207905	0.80715	0.998796	no
ENSG00000053372	ENSG00000053372	MRTO4	chr1:19210500-19260128	Control	TC32	OK	13.5673	25.6192	0.91709	0.99968	0.11705	0.998796	no
ENSG00000053438	ENSG00000053438	NNAT	chr20:37492471-37527931	Control	TC32	OK	2.88346	3.06475	0.0879688	0.0492772	0.95175	0.998796	no
ENSG00000053501	ENSG00000053501	USE1	chr19:17215345-17219829	Control	TC32	OK	18.5909	16.8866	-0.138715	-0.286677	0.72905	0.998796	no
ENSG00000053702	ENSG00000053702	NRIP2	chr12:1946053-2941140	Control	TC32	OK	2.85285	3.09923	0.119505	0.0852363	0.919	0.998796	no
ENSG00000053770	ENSG00000053770	AP5M1	chr14:57200506-57298742	Control	TC32	OK	32.248	35.0923	0.121945	0.173767	0.83225	0.998796	no
ENSG00000053900	ENSG00000053900	ANAPC4	chr4:25377212-25418498	Control	TC32	OK	23.9265	13.3921	-0.837225	-1.21183	0.15135	0.998796	no
ENSG00000053918	ENSG00000053918	KCNQ1	chr11:2444683-2861568	Control	TC32	OK	10.2952	12.1284	0.236423	0.276061	0.69585	0.998796	no
ENSG00000054116	ENSG00000054116	TRAPPC3	chr1:36136569-36180849	Control	TC32	OK	32.1686	40.9808	0.349293	0.322509	0.59475	0.998796	no
ENSG00000054118	ENSG00000054118	THRAP3	chr1:36224415-36305357	Control	TC32	OK	42.2281	36.2642	-0.219659	-0.664207	0.4057	0.998796	no
ENSG00000054148	ENSG00000054148	PHPT1	chr9:136844414-136860799	Control	TC32	OK	63.1698	100.961	0.676489	1.47581	0.08955	0.962559	no
ENSG00000054219	ENSG00000054219	LY75	chr2:159712456-159904749	Control	TC32	OK	14.5779	13.6903	-0.0906269	-0.103576	0.89105	0.998796	no
ENSG00000054267	ENSG00000054267	ARID4B	chr1:235131182-235504481	Control	TC32	OK	20.0424	17.6912	-0.180022	-0.209034	0.7542	0.998796	no
ENSG00000054277	ENSG00000054277	OPN3	chr1:241532133-241802133	Control	TC32	OK	26.7551	31.1167	0.217874	0.379271	0.6174	0.998796	no
ENSG00000054282	ENSG00000054282	SDCCAG8	chr1:243256033-243851079	Control	TC32	OK	25.9218	27.3652	0.0781761	0.101901	0.90495	0.998796	no
ENSG00000054523	ENSG00000054523	KIF1B	chr1:10210804-10381603	Control	TC32	OK	25.7501	36.2327	0.492715	0.594593	0.2637	0.998796	no
ENSG00000054611	ENSG00000054611	TBC1D22A	chr22:46762616-47175699	Control	TC32	OK	31.8416	24.3996	-0.384055	-0.891481	0.25245	0.998796	no
ENSG00000054965	ENSG00000054965	FAM168A	chr11:73400486-73598189	Control	TC32	OK	15.6428	13.4265	-0.220416	-0.459572	0.4784	0.998796	no
ENSG00000054967	ENSG00000054967	RELT	chr11:73376263-73397474	Control	TC32	OK	28.543	24.0283	-0.248404	-0.494018	0.5311	0.998796	no
ENSG00000054983	ENSG00000054983	GALC	chr14:87710418-87993665	Control	TC32	OK	25.2163	24.0824	-0.0663763	-0.114257	0.8822	0.998796	no
ENSG00000055044	ENSG00000055044	NOP58	chr2:202265715-202303666	Control	TC32	OK	26.1247	35.1288	0.42724	0.954042	0.26515	0.998796	no
ENSG00000055070	ENSG00000055070	SZRD1	chr1:16352574-16437424	Control	TC32	OK	46.7445	49.3342	0.077791	0.180974	0.8175	0.998796	no
ENSG00000055130	ENSG00000055130	CUL1	chr7:148696466-148801036	Control	TC32	OK	12.2837	14.2156	0.210734	0.59411	0.48515	0.998796	no
ENSG00000055147	ENSG00000055147	FAM114A2	chr5:153990127-154445850	Control	TC32	OK	22.0278	22.7891	0.0490232	0.0465218	0.9594	0.998796	no
ENSG00000055163	ENSG00000055163	CYFIP2	chr5:157260121-157575775	Control	TC32	OK	14.2385	16.3159	0.196476	0.28218	0.7443	0.998796	no
ENSG00000055208	ENSG00000055208	TAB2	chr6:149217925-149411613	Control	TC32	OK	40.0677	33.8717	-0.242359	-0.561667	0.39425	0.998796	no
ENSG00000055211	ENSG00000055211	GINM1	chr6:149566293-149591748	Control	TC32	OK	12.8493	12.8358	-0.00151719	-0.00371391	0.99715	0.999051	no
ENSG00000055332	ENSG00000055332	EIF2AK2	chr2:37084450-37157065	Control	TC32	OK	14.413	8.05097	-0.840133	-0.76915	0.27565	0.998796	no
ENSG00000055483	ENSG00000055483	USP36	chr17:78787380-78841441	Control	TC32	OK	35.2325	38.5347	0.12925	0.225097	0.7918	0.998796	no
ENSG00000055609	ENSG00000055609	KMT2C	chr7:152134921-152436005	Control	TC32	OK	63.825	55.6727	-0.197152	-0.187284	0.74045	0.998796	no
ENSG00000055732	ENSG00000055732	MCOLN3	chr1:84999146-85133138	Control	TC32	OK	14.2888	27.3364	0.93594	2.69918	0.00305	0.172549	no
ENSG00000055917	ENSG00000055917	PUM2	chr2:20248690-20352234	Control	TC32	OK	36.4549	37.6229	0.0454998	0.0673153	0.9317	0.998796	no
ENSG00000055950	ENSG00000055950	MRPL43	chr10:100969457-100994401	Control	TC32	OK	30.4133	29.9353	-0.0228547	-0.046894	0.9548	0.998796	no
ENSG00000055955	ENSG00000055955	ITIH4	chr3:52812974-52897596	Control	TC32	OK	5.29564	5.95503	0.169302	0.104154	0.88785	0.998796	no
ENSG00000056097	ENSG00000056097	ZFR	chr5:32354349-32444761	Control	TC32	OK	22.8917	25.6846	0.166082	0.333329	0.65165	0.998796	no
ENSG00000056558	ENSG00000056558	TRAF1	chr9:120902392-120929173	Control	TC32	OK	4.82429	65.1774	3.75598	10.5966	5e-05	0.00772968	yes
ENSG00000056586	ENSG00000056586	RC3H2	chr9:122844555-122905341	Control	TC32	OK	23.453	15.0977	-0.635448	-0.836993	0.2281	0.998796	no
ENSG00000056736	ENSG00000056736	IL17RB	chr3:53846579-53865800	Control	TC32	OK	7.47824	5.21911	-0.518894	-1.11713	0.19525	0.998796	no
ENSG00000056972	ENSG00000056972	TRAF3IP2	chr6:111299027-111606278	Control	TC32	OK	8.57727	8.57289	-0.00073699	-0.00055908	0.9993	0.999611	no
ENSG00000057019	ENSG00000057019	DCBLD2	chr3:98714329-98901689	Control	TC32	OK	3.50391	3.41555	-0.0368459	-0.0353075	0.94685	0.998796	no
ENSG00000057252	ENSG00000057252	SOAT1	chr1:179293713-179358680	Control	TC32	FAIL	65.7222	52.0317	0	0	1	1	no
ENSG00000057608	ENSG00000057608	GDI2	chr10:5765222-5842132	Control	TC32	OK	64.6467	75.8311	0.230213	0.72248	0.3939	0.998796	no
ENSG00000057657	ENSG00000057657	PRDM1	chr6:106045422-106325791	Control	TC32	OK	3.55755	11.0069	1.62946	1.38785	0.07045	0.894832	no
ENSG00000057663	ENSG00000057663	ATG5	chr6:106045422-106325791	Control	TC32	OK	15.0149	17.1166	0.188997	0.372577	0.6561	0.998796	no
ENSG00000057704	ENSG00000057704	TMCC3	chr12:94567123-94650562	Control	TC32	OK	6.65969	12.1496	0.867378	1.62765	0.01485	0.431023	no
ENSG00000057757	ENSG00000057757	PITHD1	chr1:23778404-23788232	Control	TC32	OK	17.8835	15.956	-0.164526	-0.390298	0.6442	0.998796	no
ENSG00000057935	ENSG00000057935	MTA3	chr2:42494568-42756947	Control	TC32	OK	7.80261	12.5656	0.687445	0.886359	0.34515	0.998796	no
ENSG00000058063	ENSG00000058063	ATP11B	chr3:182793499-182921938	Control	TC32	OK	30.1997	26.6631	-0.179694	-0.337406	0.65905	0.998796	no
ENSG00000058091	ENSG00000058091	CDK14	chr7:90335222-91210590	Control	TC32	OK	28.1143	34.75	0.305712	0.377644	0.65635	0.998796	no
ENSG00000058262	ENSG00000058262	SEC61A1	chr3:128051640-128408646	Control	TC32	OK	89.3156	92.4234	0.0493458	0.142247	0.85885	0.998796	no
ENSG00000058272	ENSG00000058272	PPP1R12A	chr12:79574978-79942712	Control	TC32	OK	64.7999	78.2454	0.272014	0.51645	0.55845	0.998796	no
ENSG00000058453	ENSG00000058453	CROCC	chr1:16739937-16972979	Control	TC32	OK	4.56884	3.5109	-0.379989	-0.144087	0.7692	0.998796	no
ENSG00000058600	ENSG00000058600	POLR3E	chr16:22297374-22335103	Control	TC32	OK	6.60863	7.14438	0.112458	0.170493	0.8167	0.998796	no
ENSG00000058668	ENSG00000058668	ATP2B4	chr1:203626560-203744081	Control	TC32	OK	28.8876	6.5237	-2.14669	-2.57003	0.0003	0.0334853	yes
ENSG00000058673	ENSG00000058673	ZC3H11A	chr1:203795653-203854999	Control	TC32	OK	14.4159	10.9205	-0.400619	-0.345002	0.5669	0.998796	no
ENSG00000058729	ENSG00000058729	RIOK2	chr5:97089074-97437217	Control	TC32	OK	12.7966	18.7055	0.547697	0.665631	0.4248	0.998796	no
ENSG00000058799	ENSG00000058799	YIPF1	chr1:53851718-53889834	Control	TC32	OK	11.2651	12.6748	0.170105	0.407844	0.62975	0.998796	no
ENSG00000058804	ENSG00000058804	NDC1	chr1:53765459-53838860	Control	TC32	OK	4.42412	6.53791	0.563441	1.18906	0.1308	0.998796	no
ENSG00000058866	ENSG00000058866	DGKG	chr3:186046307-186362237	Control	TC32	OK	5.18676	1.34691	-1.94518	-1.76002	0.02175	0.552038	no
ENSG00000059122	ENSG00000059122	FLYWCH1	chr16:2911936-2954276	Control	TC32	OK	10.9709	8.51839	-0.365031	-0.588588	0.4074	0.998796	no
ENSG00000059145	ENSG00000059145	UNKL	chr16:1351922-1414751	Control	TC32	OK	11.0869	6.69207	-0.728329	-0.463139	0.4708	0.998796	no
ENSG00000059377	ENSG00000059377	TBXAS1	chr7:139561569-140020325	Control	TC32	OK	237.241	143.231	-0.728008	-0.842173	0.3829	0.998796	no
ENSG00000059378	ENSG00000059378	PARP12	chr7:140023743-140063721	Control	TC32	OK	123.382	113.872	-0.115722	-0.25158	0.7631	0.998796	no
ENSG00000059588	ENSG00000059588	TARBP1	chr1:234391312-234479103	Control	TC32	OK	22.6449	24.0166	0.0848494	0.108273	0.896	0.998796	no
ENSG00000059691	ENSG00000059691	GATB	chr4:151670503-151761023	Control	TC32	OK	22.389	22.2202	-0.0109148	-0.0222652	0.9791	0.998796	no
ENSG00000059728	ENSG00000059728	MXD1	chr2:69893559-69942945	Control	TC32	OK	12.8873	21.8036	0.758618	1.0844	0.1645	0.998796	no
ENSG00000059758	ENSG00000059758	CDK17	chr12:96278260-96400560	Control	TC32	OK	34.4494	33.4866	-0.0408965	-0.0768721	0.92405	0.998796	no
ENSG00000059769	ENSG00000059769	DNAJC25	chr9:111631351-111670246	Control	TC32	OK	3.71865	4.57202	0.298052	0.370176	0.64595	0.998796	no
ENSG00000059804	ENSG00000059804	SLC2A3	chr12:7919229-7936275	Control	TC32	OK	62.1638	87.1816	0.487948	0.851891	0.32195	0.998796	no
ENSG00000060069	ENSG00000060069	CTDP1	chr18:79679800-79756623	Control	TC32	OK	10.0448	7.45124	-0.430897	-0.703315	0.32775	0.998796	no
ENSG00000060138	ENSG00000060138	YBX3	chr12:10699088-10723312	Control	TC32	OK	50.8797	69.8151	0.456449	0.971628	0.25175	0.998796	no
ENSG00000060237	ENSG00000060237	WNK1	chr12:752592-911452	Control	TC32	OK	146.267	117.982	-0.310046	-0.442045	0.5115	0.998796	no
ENSG00000060339	ENSG00000060339	CCAR1	chr10:68721011-68792377	Control	TC32	OK	53.7591	59.2791	0.141014	0.249916	0.7649	0.998796	no
ENSG00000060491	ENSG00000060491	OGFR	chr20:62796452-62814000	Control	TC32	OK	39.4291	28.0919	-0.489106	-1.36793	0.10505	0.998796	no
ENSG00000060558	ENSG00000060558	GNA15	chr19:3136192-3163769	Control	TC32	OK	15.6799	17.313	0.142939	0.360528	0.65875	0.998796	no
ENSG00000060642	ENSG00000060642	PIGV	chr1:26787471-26798398	Control	TC32	OK	8.77408	6.69546	-0.390063	-0.709729	0.3633	0.998796	no
ENSG00000060688	ENSG00000060688	SNRNP40	chr1:31259567-31296782	Control	TC32	OK	24.9095	19.6674	-0.34089	-0.674662	0.43185	0.998796	no
ENSG00000060749	ENSG00000060749	QSER1	chr11:32893177-32993316	Control	TC32	OK	20.2862	18.6177	-0.123825	-0.153645	0.7595	0.998796	no
ENSG00000060762	ENSG00000060762	MPC1	chr6:166364918-166383013	Control	TC32	OK	47.3738	37.1511	-0.350685	-0.879632	0.3085	0.998796	no
ENSG00000060971	ENSG00000060971	ACAA1	chr3:38039204-38137242	Control	TC32	OK	63.0224	35.2661	-0.837585	-1.95004	0.0242	0.581061	no
ENSG00000060982	ENSG00000060982	BCAT1	chr12:24810021-24960158	Control	TC32	OK	10.8686	39.0978	1.84693	1.72466	0.0339	0.688696	no
ENSG00000061273	ENSG00000061273	HDAC7	chr12:47706084-47837898	Control	TC32	OK	10.4207	9.5314	-0.128695	-0.0976976	0.8564	0.998796	no
ENSG00000061676	ENSG00000061676	NCKAP1	chr2:182909114-183038858	Control	TC32	OK	0.700856	5.02882	2.84303	2.58855	0.00205	0.133476	no
ENSG00000061794	ENSG00000061794	MRPS35	chr12:27710772-27756295	Control	TC32	OK	30.3181	38.6387	0.349869	0.816861	0.3251	0.998796	no
ENSG00000061936	ENSG00000061936	SFSWAP	chr12:131711080-131799737	Control	TC32	OK	44.9148	30.2284	-0.571285	-0.835794	0.2707	0.998796	no
ENSG00000061938	ENSG00000061938	TNK2	chr3:195863363-195911945	Control	TC32	OK	37.8292	15.4159	-1.29508	-2.47029	0.0039	0.202415	no
ENSG00000061987	ENSG00000061987	MON2	chr12:62466816-62600479	Control	TC32	OK	24.1055	19.6602	-0.294088	-0.493902	0.5022	0.998796	no
ENSG00000062194	ENSG00000062194	GPBP1	chr5:57173947-57264679	Control	TC32	OK	21.9485	29.867	0.444433	0.85413	0.2711	0.998796	no
ENSG00000062485	ENSG00000062485	CS	chr12:56271698-56334053	Control	TC32	OK	65.9524	78.1454	0.244737	0.481783	0.46745	0.998796	no
ENSG00000062582	ENSG00000062582	MRPS24	chr7:43866557-43926411	Control	TC32	OK	34.9712	36.5883	0.0652163	0.106108	0.9015	0.998796	no
ENSG00000062598	ENSG00000062598	ELMO2	chr20:46364550-46496731	Control	TC32	OK	24.2371	24.7978	0.0329995	0.0660738	0.9361	0.998796	no
ENSG00000062650	ENSG00000062650	WAPL	chr10:86435255-86521815	Control	TC32	OK	20.6366	24.998	0.27661	0.629638	0.37115	0.998796	no
ENSG00000062716	ENSG00000062716	VMP1	chr17:59618552-59842255	Control	TC32	OK	281.821	360.628	0.355729	0.442128	0.4714	0.998796	no
ENSG00000062725	ENSG00000062725	APPBP2	chr17:60443148-60526219	Control	TC32	OK	13.1176	8.02938	-0.708148	-0.668883	0.31575	0.998796	no
ENSG00000062822	ENSG00000062822	POLD1	chr19:50384203-50431313	Control	TC32	OK	37.3573	27.9149	-0.420355	-0.818682	0.3151	0.998796	no
ENSG00000063046	ENSG00000063046	EIF4B	chr12:53006157-53079420	Control	TC32	OK	72.5651	54.6139	-0.410009	-0.766455	0.2023	0.998796	no
ENSG00000063169	ENSG00000063169	BICRA	chr19:47607523-47743134	Control	TC32	OK	4.79884	3.52254	-0.446072	-0.722445	0.303	0.998796	no
ENSG00000063176	ENSG00000063176	SPHK2	chr19:48615327-48637438	Control	TC32	OK	11.3155	9.44319	-0.260954	-0.300357	0.71885	0.998796	no
ENSG00000063177	ENSG00000063177	RPL18	chr19:48615327-48637438	Control	TC32	OK	96.2663	87.5597	-0.136764	-0.249541	0.76795	0.998796	no
ENSG00000063180	ENSG00000063180	CA11	chr19:48637941-48682245	Control	TC32	OK	11.6594	13.8847	0.251992	0.365738	0.65825	0.998796	no
ENSG00000063241	ENSG00000063241	ISOC2	chr19:55452984-55462343	Control	TC32	OK	12.3096	11.4416	-0.105505	-0.21575	0.8046	0.998796	no
ENSG00000063244	ENSG00000063244	U2AF2	chr19:55654145-55674715	Control	TC32	OK	90.4655	70.7519	-0.354599	-0.716943	0.3855	0.998796	no
ENSG00000063245	ENSG00000063245	EPN1	chr19:55675225-55738402	Control	TC32	OK	37.0155	32.6298	-0.181941	-0.315646	0.68385	0.998796	no
ENSG00000063322	ENSG00000063322	MED29	chr19:39391302-39400637	Control	TC32	OK	13.2176	11.0286	-0.261209	-0.487573	0.5183	0.998796	no
ENSG00000063438	ENSG00000063438	AHRR	chr5:271620-438291	Control	TC32	OK	13.1454	15.0959	0.199602	0.20175	0.7007	0.998796	no
ENSG00000063601	ENSG00000063601	MTMR1	chrX:150692970-150765103	Control	TC32	OK	19.3843	14.5116	-0.417682	-0.539084	0.47465	0.998796	no
ENSG00000063761	ENSG00000063761	ADCK1	chr14:77800082-77935012	Control	TC32	OK	9.15997	6.34723	-0.529216	-0.946423	0.2577	0.998796	no
ENSG00000063854	ENSG00000063854	HAGH	chr16:1795619-1884294	Control	TC32	OK	29.7033	25.012	-0.248003	-0.512326	0.5501	0.998796	no
ENSG00000063978	ENSG00000063978	RNF4	chr4:2418973-2732565	Control	TC32	OK	29.7916	28.9948	-0.0391116	-0.0624811	0.928	0.998796	no
ENSG00000064012	ENSG00000064012	CASP8	chr2:201233442-201287711	Control	TC32	OK	38.5646	34.9594	-0.141599	-0.242079	0.7526	0.998796	no
ENSG00000064102	ENSG00000064102	INTS13	chr12:26905180-26938326	Control	TC32	OK	19.006	24.5505	0.369295	0.548759	0.5271	0.998796	no
ENSG00000064115	ENSG00000064115	TM7SF3	chr12:26971585-27014434	Control	TC32	OK	94.8561	77.4694	-0.292114	-0.557096	0.5213	0.998796	no
ENSG00000064201	ENSG00000064201	TSPAN32	chr11:2295644-2318200	Control	TC32	OK	33.9527	9.6364	-1.81696	-1.97875	0.0088	0.309112	no
ENSG00000064225	ENSG00000064225	ST3GAL6	chr3:98714329-98901689	Control	TC32	OK	38.4669	25.5629	-0.589566	-0.684536	0.41735	0.998796	no
ENSG00000064313	ENSG00000064313	TAF2	chr8:119730774-119832863	Control	TC32	OK	23.8761	22.9701	-0.0558095	-0.0758511	0.92215	0.998796	no
ENSG00000064393	ENSG00000064393	HIPK2	chr7:139561569-140020325	Control	TC32	OK	59.7669	36.2224	-0.722464	-1.48697	0.0708	0.894832	no
ENSG00000064419	ENSG00000064419	TNPO3	chr7:128954179-129055173	Control	TC32	OK	19.9853	19.3967	-0.0431274	-0.130598	0.87605	0.998796	no
ENSG00000064490	ENSG00000064490	RFXANK	chr19:19145566-19203424	Control	TC32	OK	27.7083	25.236	-0.134835	-0.110701	0.89145	0.998796	no
ENSG00000064545	ENSG00000064545	TMEM161A	chr19:19119168-19138513	Control	TC32	OK	9.42498	9.41457	-0.00159574	-0.0020635	0.9978	0.999252	no
ENSG00000064547	ENSG00000064547	LPAR2	chr19:19623667-19628930	Control	TC32	OK	12.8132	11.8411	-0.113829	-0.178941	0.8321	0.998796	no
ENSG00000064601	ENSG00000064601	CTSA	chr20:45888624-45912155	Control	TC32	OK	482.619	271.182	-0.83162	-2.02966	0.0158	0.447806	no
ENSG00000064607	ENSG00000064607	SUGP2	chr19:18990887-19060311	Control	TC32	OK	32.4401	29.9539	-0.115032	-0.232936	0.7242	0.998796	no
ENSG00000064651	ENSG00000064651	SLC12A2	chr5:128083765-128189688	Control	TC32	OK	2.27164	2.88876	0.346713	0.310808	0.68965	0.998796	no
ENSG00000064652	ENSG00000064652	SNX24	chr5:122843438-123054667	Control	TC32	OK	27.2177	21.0882	-0.368107	-0.529386	0.52135	0.998796	no
ENSG00000064666	ENSG00000064666	CNN2	chr19:1026580-1039068	Control	TC32	OK	66.323	44.5205	-0.575042	-1.06933	0.10335	0.998796	no
ENSG00000064687	ENSG00000064687	ABCA7	chr19:1040100-1065572	Control	TC32	OK	33.6695	22.7985	-0.562501	-0.903262	0.2969	0.998796	no
ENSG00000064703	ENSG00000064703	DDX20	chr1:111483347-111768016	Control	TC32	OK	5.58083	4.56051	-0.291286	-0.388981	0.6328	0.998796	no
ENSG00000064726	ENSG00000064726	BTBD1	chr15:82836945-83103443	Control	TC32	OK	41.6257	46.2879	0.153159	0.258222	0.7513	0.998796	no
ENSG00000064763	ENSG00000064763	FAR2	chr12:29149102-29381189	Control	TC32	FAIL	36.7015	26.3021	0	0	1	1	no
ENSG00000064886	ENSG00000064886	CHI3L2	chr1:111187173-111243440	Control	TC32	OK	5.15761	14.9335	1.53378	0.805528	0.10545	0.998796	no
ENSG00000064932	ENSG00000064932	SBNO2	chr19:1107635-1174283	Control	TC32	OK	14.0513	20.5986	0.551835	0.877249	0.29905	0.998796	no
ENSG00000064933	ENSG00000064933	PMS1	chr2:189770322-189877629	Control	TC32	OK	14.0538	9.06257	-0.63297	-0.74726	0.4058	0.998796	no
ENSG00000064961	ENSG00000064961	HMG20B	chr19:3506272-3579088	Control	TC32	OK	152.635	102.958	-0.568038	-0.617232	0.39835	0.998796	no
ENSG00000064995	ENSG00000064995	TAF11	chr6:34792014-34888089	Control	TC32	OK	11.2632	12.9884	0.205608	0.262559	0.76205	0.998796	no
ENSG00000064999	ENSG00000064999	ANKS1A	chr6:34889264-35091413	Control	TC32	OK	6.09336	4.1762	-0.545047	-1.08894	0.14845	0.998796	no
ENSG00000065000	ENSG00000065000	AP3D1	chr19:2100987-2248679	Control	TC32	OK	86.9215	76.8397	-0.177863	-0.265018	0.71265	0.998796	no
ENSG00000065029	ENSG00000065029	ZNF76	chr6:35258908-35295985	Control	TC32	OK	17.5832	13.7789	-0.351738	-0.723014	0.38775	0.998796	no
ENSG00000065057	ENSG00000065057	NTHL1	chr16:2039814-2135898	Control	TC32	OK	4.77952	1.88643	-1.34121	-0.476082	0.3475	0.998796	no
ENSG00000065060	ENSG00000065060	UHRF1BP1	chr6:34792014-34888089	Control	TC32	OK	7.3367	10.5017	0.517422	1.42544	0.0948	0.977729	no
ENSG00000065135	ENSG00000065135	GNAI3	chr1:109548610-109632051	Control	TC32	OK	3.75425	4.09778	0.126318	0.252727	0.7626	0.998796	no
ENSG00000065150	ENSG00000065150	IPO5	chr13:97953657-98024297	Control	TC32	OK	35.0576	45.309	0.370071	0.612474	0.48375	0.998796	no
ENSG00000065154	ENSG00000065154	OAT	chr10:124397302-124418976	Control	TC32	OK	11.6922	16.2137	0.471671	0.862003	0.31705	0.998796	no
ENSG00000065183	ENSG00000065183	WDR3	chr1:117929719-118185223	Control	TC32	OK	5.18026	4.86064	-0.0918795	-0.0955207	0.90045	0.998796	no
ENSG00000065243	ENSG00000065243	PKN2	chr1:87620802-88836255	Control	TC32	OK	18.0258	14.4757	-0.316432	-0.367501	0.6152	0.998796	no
ENSG00000065268	ENSG00000065268	WDR18	chr19:984270-998438	Control	TC32	OK	15.0328	9.58665	-0.649017	-1.0571	0.1936	0.998796	no
ENSG00000065308	ENSG00000065308	TRAM2	chr6:52361420-52576915	Control	TC32	OK	3.28393	2.61562	-0.32827	-0.503194	0.5598	0.998796	no
ENSG00000065357	ENSG00000065357	DGKA	chr12:55901412-55954027	Control	TC32	OK	9.32491	13.9737	0.583552	0.712967	0.3078	0.998796	no
ENSG00000065413	ENSG00000065413	ANKRD44	chr2:196967016-197311173	Control	TC32	OK	26.741	17.5957	-0.603825	-0.686272	0.39175	0.998796	no
ENSG00000065427	ENSG00000065427	KARS	chr16:75627473-75761872	Control	TC32	OK	57.0132	68.4555	0.263871	0.43046	0.59525	0.998796	no
ENSG00000065457	ENSG00000065457	ADAT1	chr16:75528531-75623300	Control	TC32	OK	31.9384	29.5423	-0.112507	-0.17176	0.8397	0.998796	no
ENSG00000065485	ENSG00000065485	PDIA5	chr3:123067061-123274130	Control	TC32	OK	3.08652	4.65428	0.592578	0.563882	0.45395	0.998796	no
ENSG00000065491	ENSG00000065491	TBC1D22B	chr6:37212179-37332970	Control	TC32	OK	6.24799	6.81781	0.125915	0.311787	0.7088	0.998796	no
ENSG00000065518	ENSG00000065518	NDUFB4	chr3:120596308-120602500	Control	TC32	OK	99.2873	89.5543	-0.148847	-0.324904	0.7021	0.998796	no
ENSG00000065526	ENSG00000065526	SPEN	chr1:15834473-15940460	Control	TC32	OK	28.3189	36.163	0.352747	0.590024	0.4323	0.998796	no
ENSG00000065548	ENSG00000065548	ZC3H15	chr2:186486155-186509363	Control	TC32	OK	44.0887	39.477	-0.159397	-0.362907	0.65775	0.998796	no
ENSG00000065559	ENSG00000065559	MAP2K4	chr17:11998352-12143830	Control	TC32	OK	8.96238	8.98045	0.00290606	0.00582106	0.9937	0.998826	no
ENSG00000065600	ENSG00000065600	TMEM206	chr1:212363930-212414901	Control	TC32	OK	15.3976	17.6968	0.200786	0.42582	0.61215	0.998796	no
ENSG00000065613	ENSG00000065613	SLK	chr10:103967200-104029233	Control	TC32	OK	21.1958	23.908	0.173719	0.243768	0.7614	0.998796	no
ENSG00000065615	ENSG00000065615	CYB5R4	chr6:83859642-83967424	Control	TC32	OK	18.4476	22.6961	0.299009	0.468486	0.58055	0.998796	no
ENSG00000065665	ENSG00000065665	SEC61A2	chr10:12129636-12250589	Control	TC32	OK	3.06243	3.33097	0.121264	0.0705878	0.9118	0.998796	no
ENSG00000065802	ENSG00000065802	ASB1	chr2:238426741-238452250	Control	TC32	OK	36.1361	22.4929	-0.683969	-0.998545	0.24885	0.998796	no
ENSG00000065809	ENSG00000065809	FAM107B	chr10:14518556-14774897	Control	TC32	OK	53.4738	58.5226	0.130163	0.260611	0.74825	0.998796	no
ENSG00000065833	ENSG00000065833	ME1	chr6:83210388-83431071	Control	TC32	OK	13.2177	25.3811	0.941281	2.68706	0.00215	0.137206	no
ENSG00000065882	ENSG00000065882	TBC1D1	chr4:37891086-38139175	Control	TC32	OK	154.539	134.818	-0.196962	-0.397846	0.6554	0.998796	no
ENSG00000065883	ENSG00000065883	CDK13	chr7:39947521-40099580	Control	TC32	OK	56.2188	46.3979	-0.276991	-0.575376	0.51045	0.998796	no
ENSG00000065911	ENSG00000065911	MTHFD2	chr2:74198561-74421662	Control	TC32	OK	99.3233	152.354	0.617221	0.842429	0.28915	0.998796	no
ENSG00000065923	ENSG00000065923	SLC9A7	chrX:46599251-46759172	Control	TC32	OK	13.8361	12.4417	-0.153252	-0.257359	0.6436	0.998796	no
ENSG00000065970	ENSG00000065970	FOXJ2	chr12:8032702-8055503	Control	TC32	OK	10.6545	12.0694	0.17989	0.510267	0.5469	0.998796	no
ENSG00000065978	ENSG00000065978	YBX1	chr1:42682426-42702349	Control	TC32	OK	266.311	176.521	-0.593273	-1.49738	0.08265	0.931149	no
ENSG00000065989	ENSG00000065989	PDE4A	chr19:10391133-10469631	Control	TC32	OK	14.9613	20.2912	0.439625	0.499843	0.46875	0.998796	no
ENSG00000066027	ENSG00000066027	PPP2R5A	chr1:212285536-212361863	Control	TC32	OK	20.9597	15.4629	-0.438808	-0.851289	0.28995	0.998796	no
ENSG00000066044	ENSG00000066044	ELAVL1	chr19:7958578-8005659	Control	TC32	OK	31.0123	31.2877	0.0127536	0.029525	0.9733	0.998796	no
ENSG00000066084	ENSG00000066084	DIP2B	chr12:50504984-50748667	Control	TC32	OK	22.619	19.7263	-0.197414	-0.231894	0.7159	0.998796	no
ENSG00000066117	ENSG00000066117	SMARCD1	chr12:50084971-50100712	Control	TC32	OK	20.5709	13.3881	-0.619646	-1.25263	0.09895	0.997749	no
ENSG00000066135	ENSG00000066135	KDM4A	chr1:43650148-43931165	Control	TC32	OK	15.975	14.5133	-0.138439	-0.196964	0.7232	0.998796	no
ENSG00000066136	ENSG00000066136	NFYC	chr1:40690379-40771603	Control	TC32	OK	27.6869	25.465	-0.120687	-0.271072	0.7356	0.998796	no
ENSG00000066294	ENSG00000066294	CD84	chr1:160537072-160579516	Control	TC32	OK	86.0851	87.1595	0.0178945	0.0288862	0.97015	0.998796	no
ENSG00000066322	ENSG00000066322	ELOVL1	chr1:43363396-43368074	Control	TC32	OK	52.3958	61.3881	0.228506	0.616028	0.47345	0.998796	no
ENSG00000066336	ENSG00000066336	SPI1	chr11:47354859-47378576	Control	TC32	OK	419.493	306.717	-0.451736	-1.41682	0.0896	0.962559	no
ENSG00000066422	ENSG00000066422	ZBTB11	chr3:101648888-101679217	Control	TC32	OK	11.1509	9.55149	-0.223361	-0.405648	0.5626	0.998796	no
ENSG00000066427	ENSG00000066427	ATXN3	chr14:92044495-92106625	Control	TC32	OK	26.8881	20.8882	-0.36428	-0.593033	0.4779	0.998796	no
ENSG00000066455	ENSG00000066455	GOLGA5	chr14:92794230-92839963	Control	TC32	OK	18.0586	16.3772	-0.141003	-0.283702	0.72335	0.998796	no
ENSG00000066557	ENSG00000066557	LRRC40	chr1:69568397-70205620	Control	TC32	OK	2.54287	2.89037	0.184801	0.296915	0.73445	0.998796	no
ENSG00000066583	ENSG00000066583	ISOC1	chr5:129094750-129114028	Control	TC32	OK	13.7901	12.5939	-0.130913	-0.280956	0.72325	0.998796	no
ENSG00000066651	ENSG00000066651	TRMT11	chr6:125986429-126039276	Control	TC32	OK	3.37994	3.47905	0.0416964	0.0540913	0.94745	0.998796	no
ENSG00000066654	ENSG00000066654	THUMPD1	chr16:20610242-20925006	Control	TC32	OK	20.8898	21.731	0.0569547	0.0859906	0.9054	0.998796	no
ENSG00000066697	ENSG00000066697	MSANTD3	chr9:100427155-100577636	Control	TC32	OK	20.7451	99.2825	2.25877	6.47473	5e-05	0.00772968	yes
ENSG00000066739	ENSG00000066739	ATG2B	chr14:96279201-96387288	Control	TC32	OK	12.1559	11.5695	-0.0713327	-0.0679636	0.91	0.998796	no
ENSG00000066777	ENSG00000066777	ARFGEF1	chr8:66964098-67343677	Control	TC32	OK	31.5762	33.408	0.0813523	0.122607	0.8509	0.998796	no
ENSG00000066827	ENSG00000066827	ZFAT	chr8:134477787-134713049	Control	TC32	OK	7.77099	5.629	-0.465221	-0.640541	0.34855	0.998796	no
ENSG00000066855	ENSG00000066855	MTFR1	chr8:65644733-65842322	Control	TC32	OK	14.8005	15.1989	0.038322	0.0375144	0.96065	0.998796	no
ENSG00000066923	ENSG00000066923	STAG3	chr7:100177562-100272218	Control	TC32	OK	10.1925	5.24314	-0.959006	-1.11569	0.1843	0.998796	no
ENSG00000066926	ENSG00000066926	FECH	chr18:57548282-57586772	Control	TC32	OK	22.4554	19.2799	-0.219966	-0.359877	0.65995	0.998796	no
ENSG00000066933	ENSG00000066933	MYO9A	chr15:71818395-72155459	Control	TC32	OK	18.923	32.2527	0.769282	0.511875	0.3694	0.998796	no
ENSG00000067048	ENSG00000067048	DDX3Y	chrY:12904107-12920478	Control	TC32	OK	46.5917	43.6769	-0.0932017	-0.147544	0.8615	0.998796	no
ENSG00000067057	ENSG00000067057	PFKP	chr10:3066332-3172841	Control	TC32	OK	74.2214	85.9555	0.211755	0.24177	0.7086	0.998796	no
ENSG00000067064	ENSG00000067064	IDI1	chr10:971145-1049170	Control	TC32	OK	20.2287	16.8926	-0.260011	-0.438722	0.5953	0.998796	no
ENSG00000067066	ENSG00000067066	SP100	chr2:230415941-230580006	Control	TC32	OK	65.7007	68.1409	0.0526125	0.0996941	0.9157	0.998796	no
ENSG00000067082	ENSG00000067082	KLF6	chr10:3775995-3785281	Control	TC32	OK	71.0378	89.8511	0.33895	0.575808	0.4632	0.998796	no
ENSG00000067167	ENSG00000067167	TRAM1	chr8:70573441-70608387	Control	TC32	OK	56.6261	64.9738	0.198393	0.467857	0.57765	0.998796	no
ENSG00000067182	ENSG00000067182	TNFRSF1A	chr12:6328756-6342114	Control	TC32	OK	97.4976	89.6729	-0.120695	-0.280259	0.7389	0.998796	no
ENSG00000067191	ENSG00000067191	CACNB1	chr17:39173289-39197703	Control	TC32	OK	7.06283	3.26891	-1.11144	-1.22424	0.1244	0.998796	no
ENSG00000067208	ENSG00000067208	EVI5	chr1:92508695-92792404	Control	TC32	OK	26.7334	26.1448	-0.0321194	-0.0366701	0.9591	0.998796	no
ENSG00000067225	ENSG00000067225	PKM	chr15:72199028-72231822	Control	TC32	OK	1016.24	1113.29	0.1316	0.297661	0.7125	0.998796	no
ENSG00000067248	ENSG00000067248	DHX29	chr5:55233933-55307722	Control	TC32	OK	8.03977	8.13482	0.0169561	0.0322899	0.9672	0.998796	no
ENSG00000067334	ENSG00000067334	DNTTIP2	chr1:93866282-93879918	Control	TC32	OK	36.7003	57.473	0.647092	1.2627	0.11665	0.998796	no
ENSG00000067365	ENSG00000067365	METTL22	chr16:8621682-8649654	Control	TC32	OK	45.9215	31.479	-0.54478	-0.699262	0.3887	0.998796	no
ENSG00000067369	ENSG00000067369	TP53BP1	chr15:43358171-43510728	Control	TC32	OK	12.1364	13.5968	0.163931	0.17327	0.73405	0.998796	no
ENSG00000067533	ENSG00000067533	RRP15	chr1:218285286-218337983	Control	TC32	OK	8.09824	10.3284	0.35093	0.385486	0.64585	0.998796	no
ENSG00000067560	ENSG00000067560	RHOA	chr3:49359144-49416475	Control	TC32	OK	367.567	337.486	-0.12318	-0.33204	0.697	0.998796	no
ENSG00000067596	ENSG00000067596	DHX8	chr17:43483864-43610338	Control	TC32	OK	32.0938	26.0704	-0.299884	-0.243899	0.638	0.998796	no
ENSG00000067646	ENSG00000067646	ZFY	chrY:2935280-3002626	Control	TC32	OK	7.42491	10.319	0.474855	0.625447	0.42485	0.998796	no
ENSG00000067704	ENSG00000067704	IARS2	chr1:220094101-220148041	Control	TC32	OK	49.3519	36.4726	-0.436294	-0.697506	0.3876	0.998796	no
ENSG00000067829	ENSG00000067829	IDH3G	chrX:153785765-153798505	Control	TC32	OK	58.0179	55.4247	-0.0659685	-0.134605	0.87465	0.998796	no
ENSG00000067836	ENSG00000067836	ROGDI	chr16:4796967-4802950	Control	TC32	OK	15.8929	6.78959	-1.22699	-2.47088	0.00205	0.133476	no
ENSG00000067900	ENSG00000067900	ROCK1	chr18:20946905-21111851	Control	TC32	OK	34.2313	43.6301	0.350006	0.503904	0.44455	0.998796	no
ENSG00000067955	ENSG00000067955	CBFB	chr16:67029115-67101058	Control	TC32	OK	36.7005	46.2277	0.332958	0.378438	0.5833	0.998796	no
ENSG00000067992	ENSG00000067992	PDK3	chrX:24465220-24539837	Control	TC32	OK	6.97523	5.1966	-0.424673	-0.580924	0.46025	0.998796	no
ENSG00000068001	ENSG00000068001	HYAL2	chr3:50317789-50328251	Control	TC32	OK	11.2624	11.7387	0.0597614	0.0824593	0.90225	0.998796	no
ENSG00000068024	ENSG00000068024	HDAC4	chr2:239048167-239402364	Control	TC32	OK	13.8248	21.9136	0.664571	0.739953	0.3767	0.998796	no
ENSG00000068028	ENSG00000068028	RASSF1	chr3:50329781-50340980	Control	TC32	OK	24.8434	16.4655	-0.593416	-1.59276	0.06665	0.888176	no
ENSG00000068079	ENSG00000068079	IFI35	chr17:43006724-43014456	Control	TC32	OK	22.8488	22.5372	-0.0198116	-0.0388807	0.9631	0.998796	no
ENSG00000068097	ENSG00000068097	HEATR6	chr17:60043193-60078931	Control	TC32	OK	12.3321	14.8523	0.268267	0.414203	0.5827	0.998796	no
ENSG00000068120	ENSG00000068120	COASY	chr17:42536171-42566277	Control	TC32	OK	52.6612	43.3279	-0.281445	-0.381373	0.60475	0.998796	no
ENSG00000068305	ENSG00000068305	MEF2A	chr15:99565416-99733561	Control	TC32	OK	44.0979	41.5958	-0.084274	-0.155629	0.85435	0.998796	no
ENSG00000068308	ENSG00000068308	OTUD5	chrX:48922027-48958386	Control	TC32	OK	22.9538	18.9303	-0.278034	-0.689068	0.41405	0.998796	no
ENSG00000068323	ENSG00000068323	TFE3	chrX:49028725-49043486	Control	TC32	OK	21.8141	23.2536	0.0921947	0.200664	0.787	0.998796	no
ENSG00000068354	ENSG00000068354	TBC1D25	chrX:48539456-48562609	Control	TC32	OK	6.38269	5.03132	-0.343226	-0.503799	0.5224	0.998796	no
ENSG00000068366	ENSG00000068366	ACSL4	chrX:109623699-109733403	Control	TC32	OK	40.5192	64.745	0.676164	0.806422	0.34445	0.998796	no
ENSG00000068383	ENSG00000068383	INPP5A	chr10:132537819-132786052	Control	TC32	OK	6.2145	3.29905	-0.913588	-0.998307	0.19765	0.998796	no
ENSG00000068394	ENSG00000068394	GPKOW	chrX:49113388-49123801	Control	TC32	OK	8.76119	8.39692	-0.0612664	-0.142835	0.86765	0.998796	no
ENSG00000068400	ENSG00000068400	GRIPAP1	chrX:48973719-49002264	Control	TC32	OK	40.0237	38.6115	-0.0518251	-0.0849636	0.9104	0.998796	no
ENSG00000068438	ENSG00000068438	FTSJ1	chrX:48476020-48486364	Control	TC32	OK	14.6795	15.0627	0.0371817	0.0728395	0.931	0.998796	no
ENSG00000068489	ENSG00000068489	PRR11	chr17:59155498-59215247	Control	TC32	OK	7.41282	3.88113	-0.933546	-0.588949	0.246	0.998796	no
ENSG00000068650	ENSG00000068650	ATP11A	chr13:112690328-112887168	Control	TC32	OK	60.6157	55.872	-0.117566	-0.158774	0.7937	0.998796	no
ENSG00000068654	ENSG00000068654	POLR1A	chr2:86020215-86106155	Control	TC32	OK	24.4472	30.2912	0.309227	0.278163	0.6954	0.998796	no
ENSG00000068697	ENSG00000068697	LAPTM4A	chr2:20032649-20052028	Control	TC32	OK	97.8231	96.3592	-0.0217533	-0.0499981	0.9536	0.998796	no
ENSG00000068724	ENSG00000068724	TTC7A	chr2:46899274-47176601	Control	TC32	OK	22.231	15.7051	-0.501337	-0.449672	0.43175	0.998796	no
ENSG00000068745	ENSG00000068745	IP6K2	chr3:48688002-48740353	Control	TC32	OK	32.189	28.0491	-0.198617	-0.453451	0.58545	0.998796	no
ENSG00000068784	ENSG00000068784	SRBD1	chr2:45388679-45612165	Control	TC32	OK	8.71206	9.55268	0.13289	0.242615	0.73865	0.998796	no
ENSG00000068796	ENSG00000068796	KIF2A	chr5:62306161-62628582	Control	TC32	OK	13.3508	13.7178	0.0391138	0.0523549	0.94415	0.998796	no
ENSG00000068878	ENSG00000068878	PSME4	chr2:53864066-54305300	Control	TC32	OK	23.0862	29.3542	0.346533	0.514279	0.47275	0.998796	no
ENSG00000068885	ENSG00000068885	IFT80	chr3:160225495-160485773	Control	TC32	OK	3.48033	4.39923	0.338026	0.198861	0.75315	0.998796	no
ENSG00000068903	ENSG00000068903	SIRT2	chr19:38878554-38908893	Control	TC32	OK	11.4722	7.54249	-0.605034	-0.895388	0.2173	0.998796	no
ENSG00000068912	ENSG00000068912	ERLEC1	chr2:53532671-53860160	Control	TC32	OK	11.7454	11.2189	-0.0661574	-0.108416	0.88315	0.998796	no
ENSG00000068971	ENSG00000068971	PPP2R5B	chr11:64917552-64935888	Control	TC32	OK	4.83621	3.76838	-0.359935	-0.370412	0.6489	0.998796	no
ENSG00000069248	ENSG00000069248	NUP133	chr1:229440259-229508341	Control	TC32	OK	11.6498	10.0784	-0.20904	-0.340471	0.67195	0.998796	no
ENSG00000069275	ENSG00000069275	NUCKS1	chr1:205712818-205750276	Control	TC32	OK	134.518	102.522	-0.391862	-0.231319	0.7751	0.998796	no
ENSG00000069329	ENSG00000069329	VPS35	chr16:46656131-46689518	Control	TC32	OK	102.391	106.492	0.0566645	0.114328	0.89585	0.998796	no
ENSG00000069345	ENSG00000069345	DNAJA2	chr16:46955361-46973788	Control	TC32	OK	38.4382	35.5577	-0.112381	-0.297855	0.72945	0.998796	no
ENSG00000069399	ENSG00000069399	BCL3	chr19:44747704-44760044	Control	TC32	OK	10.8683	45.8485	2.07674	3.84092	0.0001	0.0140335	yes
ENSG00000069424	ENSG00000069424	KCNAB2	chr1:5862810-6101193	Control	TC32	OK	229.387	134.471	-0.770486	-1.44606	0.06045	0.856642	no
ENSG00000069493	ENSG00000069493	CLEC2D	chr12:9664968-9699555	Control	TC32	OK	19.2714	51.7276	1.42447	2.10628	0.00505	0.235468	no
ENSG00000069509	ENSG00000069509	FUNDC1	chrX:44523638-44543001	Control	TC32	OK	3.96165	3.39534	-0.222548	-0.359816	0.66995	0.998796	no
ENSG00000069812	ENSG00000069812	HES2	chr1:6412417-6424670	Control	TC32	OK	4.76947	0.256601	-4.21623	-4.44185	0.0001	0.0140335	yes
ENSG00000069849	ENSG00000069849	ATP1B3	chr3:141876123-141926514	Control	TC32	OK	106.574	159.652	0.583075	1.72689	0.0414	0.751634	no
ENSG00000069943	ENSG00000069943	PIGB	chr15:55202965-55508234	Control	TC32	OK	10.9926	12.7919	0.21869	0.1181	0.8172	0.998796	no
ENSG00000069956	ENSG00000069956	MAPK6	chr15:51829627-52100523	Control	TC32	OK	20.5426	20.6627	0.00841264	0.00892376	0.9876	0.998796	no
ENSG00000069974	ENSG00000069974	RAB27A	chr15:55202965-55508234	Control	TC32	OK	14.592	17.183	0.235804	0.163577	0.8135	0.998796	no
ENSG00000069998	ENSG00000069998	HDHD5	chr22:17137510-17165445	Control	TC32	OK	26.5417	25.5901	-0.0526733	-0.131059	0.8778	0.998796	no
ENSG00000070010	ENSG00000070010	UFD1	chr22:19330697-19479215	Control	TC32	OK	9.32968	7.5809	-0.299459	-0.333956	0.6821	0.998796	no
ENSG00000070047	ENSG00000070047	PHRF1	chr11:576485-612222	Control	TC32	OK	6.06007	5.50816	-0.137765	-0.275547	0.6991	0.998796	no
ENSG00000070061	ENSG00000070061	ELP1	chr9:108867516-108934116	Control	TC32	OK	5.92209	6.03042	0.0261518	0.0466694	0.94145	0.998796	no
ENSG00000070081	ENSG00000070081	NUCB2	chr11:17208152-17349980	Control	TC32	OK	13.1231	8.45514	-0.634211	-0.88348	0.24855	0.998796	no
ENSG00000070087	ENSG00000070087	PFN2	chr3:149761099-150225190	Control	TC32	OK	4.34888	3.7761	-0.203749	-0.0834964	0.88075	0.998796	no
ENSG00000070190	ENSG00000070190	DAPP1	chr4:99816832-99870154	Control	TC32	OK	8.45595	4.56669	-0.888819	-1.89766	0.0268	0.61734	no
ENSG00000070214	ENSG00000070214	SLC44A1	chr9:105244621-105439171	Control	TC32	OK	11.2763	14.8365	0.395863	0.692634	0.3286	0.998796	no
ENSG00000070269	ENSG00000070269	TMEM260	chr14:56488353-56730535	Control	TC32	OK	12.1829	11.4931	-0.0840909	-0.144132	0.85135	0.998796	no
ENSG00000070366	ENSG00000070366	SMG6	chr17:2054153-2381058	Control	TC32	OK	13.449	16.8708	0.327026	0.276009	0.51925	0.998796	no
ENSG00000070367	ENSG00000070367	EXOC5	chr14:57200506-57298742	Control	TC32	OK	18.8403	22.7058	0.269242	0.303952	0.66135	0.998796	no
ENSG00000070413	ENSG00000070413	DGCR2	chr22:19036281-19128449	Control	TC32	FAIL	18.4537	11.9311	0	0	1	1	no
ENSG00000070423	ENSG00000070423	RNF126	chr19:647525-663277	Control	TC32	OK	12.7046	8.22251	-0.627702	-1.22503	0.1498	0.998796	no
ENSG00000070444	ENSG00000070444	MNT	chr17:2384059-2401118	Control	TC32	OK	39.335	27.3431	-0.524637	-0.929788	0.2126	0.998796	no
ENSG00000070476	ENSG00000070476	ZXDC	chr3:126437600-126475919	Control	TC32	OK	19.1645	18.5201	-0.0493379	-0.142419	0.8651	0.998796	no
ENSG00000070495	ENSG00000070495	JMJD6	chr17:76712831-76726799	Control	TC32	OK	14.081	16.4645	0.225613	0.448712	0.5746	0.998796	no
ENSG00000070501	ENSG00000070501	POLB	chr8:42338453-42371808	Control	TC32	OK	13.3988	9.60372	-0.480437	-0.429441	0.6892	0.998796	no
ENSG00000070540	ENSG00000070540	WIPI1	chr17:68259181-68763882	Control	TC32	OK	13.9946	11.6151	-0.268877	-0.121942	0.80135	0.998796	no
ENSG00000070610	ENSG00000070610	GBA2	chr9:35696947-35749228	Control	TC32	OK	68.2861	73.5059	0.106267	0.0874672	0.92515	0.998796	no
ENSG00000070614	ENSG00000070614	NDST1	chr5:150475530-150558211	Control	TC32	OK	21.7876	21.1023	-0.0461087	-0.0610015	0.92005	0.998796	no
ENSG00000070669	ENSG00000070669	ASNS	chr7:97851687-97972985	Control	TC32	OK	14.8431	29.9652	1.0135	1.98375	0.02295	0.564648	no
ENSG00000070718	ENSG00000070718	AP3M2	chr8:42152945-42171673	Control	TC32	OK	16.5438	18.7147	0.177881	0.258606	0.7513	0.998796	no
ENSG00000070731	ENSG00000070731	ST6GALNAC2	chr17:76557765-76586956	Control	TC32	OK	19.0343	9.35315	-1.02508	-0.763822	0.2897	0.998796	no
ENSG00000070756	ENSG00000070756	PABPC1	chr8:100685815-100722809	Control	TC32	OK	1097.31	925.819	-0.245168	-0.643542	0.44235	0.998796	no
ENSG00000070761	ENSG00000070761	CFAP20	chr16:58113587-58129450	Control	TC32	OK	12.1045	10.6827	-0.180276	-0.293811	0.7335	0.998796	no
ENSG00000070770	ENSG00000070770	CSNK2A2	chr16:58129528-58217805	Control	TC32	OK	37.268	35.4762	-0.0710893	-0.159634	0.8382	0.998796	no
ENSG00000070785	ENSG00000070785	EIF2B3	chr1:44850521-44986722	Control	TC32	OK	12.7267	12.0447	-0.0794624	-0.139852	0.857	0.998796	no
ENSG00000070814	ENSG00000070814	TCOF1	chr5:150357638-150400308	Control	TC32	OK	13.3908	12.9013	-0.0537332	-0.11797	0.8738	0.998796	no
ENSG00000070831	ENSG00000070831	CDC42	chr1:22052626-22092946	Control	TC32	OK	114.739	102.606	-0.161233	-0.520392	0.54085	0.998796	no
ENSG00000070882	ENSG00000070882	OSBPL3	chr7:24796538-24981634	Control	TC32	OK	22.1763	18.1153	-0.291812	-0.343613	0.61165	0.998796	no
ENSG00000070950	ENSG00000070950	RAD18	chr3:8619399-8963773	Control	TC32	OK	4.44418	5.8797	0.403826	0.51576	0.4226	0.998796	no
ENSG00000070961	ENSG00000070961	ATP2B1	chr12:89561128-89712590	Control	TC32	OK	43.1347	44.2364	0.0363849	0.0662796	0.93575	0.998796	no
ENSG00000071051	ENSG00000071051	NCK2	chr2:105744896-105894274	Control	TC32	OK	9.5872	17.6001	0.876402	1.4742	0.0614	0.862494	no
ENSG00000071054	ENSG00000071054	MAP4K4	chr2:101696849-101894689	Control	TC32	FAIL	217.352	135.614	0	0	1	1	no
ENSG00000071073	ENSG00000071073	MGAT4A	chr2:98619105-98731126	Control	TC32	OK	14.2467	8.94306	-0.671783	-0.924193	0.27735	0.998796	no
ENSG00000071082	ENSG00000071082	RPL31	chr2:100820151-101270316	Control	TC32	OK	60.4607	68.0608	0.170827	0.154883	0.8594	0.998796	no
ENSG00000071127	ENSG00000071127	WDR1	chr4:10074338-10116949	Control	TC32	OK	168.08	137.65	-0.28814	-0.587461	0.42365	0.998796	no
ENSG00000071189	ENSG00000071189	SNX13	chr7:17790760-17940501	Control	TC32	OK	36.0424	30.0264	-0.263461	-0.292967	0.7251	0.998796	no
ENSG00000071205	ENSG00000071205	ARHGAP10	chr4:147732062-148072780	Control	TC32	OK	38.2576	43.6772	0.191135	0.366425	0.6263	0.998796	no
ENSG00000071242	ENSG00000071242	RPS6KA2	chr6:166409363-166957191	Control	TC32	OK	30.3455	19.0774	-0.66962	-0.95878	0.25575	0.998796	no
ENSG00000071243	ENSG00000071243	ING3	chr7:120950748-120977216	Control	TC32	OK	6.64685	7.18023	0.111359	0.199455	0.81495	0.998796	no
ENSG00000071246	ENSG00000071246	VASH1	chr14:76762188-76826246	Control	TC32	OK	80.1636	53.8979	-0.572719	-1.01012	0.12855	0.998796	no
ENSG00000071462	ENSG00000071462	BUD23	chr7:73680968-73719672	Control	TC32	OK	29.195	30.2966	0.0534331	0.0945357	0.9086	0.998796	no
ENSG00000071537	ENSG00000071537	SEL1L	chr14:81471548-81533861	Control	TC32	OK	91.3785	89.8504	-0.0243291	-0.0350189	0.9641	0.998796	no
ENSG00000071553	ENSG00000071553	ATP6AP1	chrX:154428631-154436516	Control	TC32	OK	259.269	213.462	-0.28047	-0.784863	0.29985	0.998796	no
ENSG00000071564	ENSG00000071564	TCF3	chr19:1609289-1652605	Control	TC32	OK	21.7446	18.5	-0.233132	-0.528961	0.51055	0.998796	no
ENSG00000071575	ENSG00000071575	TRIB2	chr2:12716888-12742734	Control	TC32	OK	8.81384	5.50403	-0.679284	-1.22248	0.12665	0.998796	no
ENSG00000071626	ENSG00000071626	DAZAP1	chr19:1407568-1435687	Control	TC32	OK	52.0231	50.0162	-0.0567578	-0.13181	0.8596	0.998796	no
ENSG00000071655	ENSG00000071655	MBD3	chr19:1573595-1605490	Control	TC32	OK	41.6532	37.9614	-0.133896	-0.234817	0.754	0.998796	no
ENSG00000071794	ENSG00000071794	HLTF	chr3:149030126-149102823	Control	TC32	OK	4.36436	3.1334	-0.478041	-0.590982	0.42445	0.998796	no
ENSG00000071859	ENSG00000071859	FAM50A	chrX:154444125-154450654	Control	TC32	OK	44.8676	41.5752	-0.109951	-0.229095	0.7661	0.998796	no
ENSG00000071889	ENSG00000071889	FAM3A	chrX:154506158-154516242	Control	TC32	OK	16.0373	15.0257	-0.094005	-0.16227	0.84635	0.998796	no
ENSG00000071894	ENSG00000071894	CPSF1	chr8:144373100-144409349	Control	TC32	OK	30.4469	23.9563	-0.34589	-0.593289	0.52415	0.998796	no
ENSG00000071967	ENSG00000071967	CYBRD1	chr2:171522246-171558133	Control	TC32	OK	12.3212	7.33468	-0.748338	-1.48458	0.0632	0.871268	no
ENSG00000071994	ENSG00000071994	PDCD2	chr6:170575294-170584692	Control	TC32	OK	17.3392	18.0877	0.0609664	0.116406	0.8899	0.998796	no
ENSG00000072042	ENSG00000072042	RDH11	chr14:67619797-67695814	Control	TC32	OK	37.9375	28.0974	-0.433188	-0.794163	0.3188	0.998796	no
ENSG00000072062	ENSG00000072062	PRKACA	chr19:14091687-14118084	Control	TC32	OK	79.4719	52.9551	-0.585676	-1.1627	0.1393	0.998796	no
ENSG00000072071	ENSG00000072071	ADGRL1	chr19:14137178-14206187	Control	TC32	OK	7.42689	3.84384	-0.950211	-0.822344	0.29945	0.998796	no
ENSG00000072110	ENSG00000072110	ACTN1	chr14:68874142-68979440	Control	TC32	OK	228.206	220.148	-0.0518626	-0.097877	0.8931	0.998796	no
ENSG00000072121	ENSG00000072121	ZFYVE26	chr14:67701885-67816590	Control	TC32	OK	107.974	47.9412	-1.17135	-1.23862	0.11525	0.998796	no
ENSG00000072134	ENSG00000072134	EPN2	chr17:19215614-19336715	Control	TC32	OK	23.8415	2.72304	-3.13018	-4.76486	5e-05	0.00772968	yes
ENSG00000072135	ENSG00000072135	PTPN18	chr2:130356006-130375409	Control	TC32	OK	116.834	93.3234	-0.324151	-0.610677	0.41705	0.998796	no
ENSG00000072163	ENSG00000072163	LIMS2	chr2:127638380-127681786	Control	TC32	OK	5.62456	4.21161	-0.417371	-0.685845	0.3986	0.998796	no
ENSG00000072210	ENSG00000072210	ALDH3A2	chr17:19648135-19677598	Control	TC32	OK	102.917	113.585	0.14229	0.270537	0.75315	0.998796	no
ENSG00000072274	ENSG00000072274	TFRC	chr3:196027182-196082189	Control	TC32	FAIL	1530.16	1518.53	0	0	1	1	no
ENSG00000072310	ENSG00000072310	SREBF1	chr17:17681472-17837002	Control	TC32	OK	66.7433	66.0374	-0.0153381	-0.0238151	0.9762	0.998796	no
ENSG00000072364	ENSG00000072364	AFF4	chr5:132875378-132963634	Control	TC32	OK	65.3705	72.7909	0.155118	0.200598	0.80195	0.998796	no
ENSG00000072401	ENSG00000072401	UBE2D1	chr10:58334974-58370753	Control	TC32	OK	14.7195	9.31856	-0.659548	-1.18024	0.1922	0.998796	no
ENSG00000072415	ENSG00000072415	MPP5	chr14:67241108-67386516	Control	TC32	OK	7.96506	6.09488	-0.386087	-0.367453	0.59985	0.998796	no
ENSG00000072501	ENSG00000072501	SMC1A	chrX:53374148-53431120	Control	TC32	OK	47.7376	47.1243	-0.0186543	-0.0328119	0.9705	0.998796	no
ENSG00000072506	ENSG00000072506	HSD17B10	chrX:53431257-53434373	Control	TC32	OK	25.3972	31.9559	0.331411	0.772054	0.3653	0.998796	no
ENSG00000072518	ENSG00000072518	MARK2	chr11:63838927-63911019	Control	TC32	OK	31.5455	28.9201	-0.125362	-0.209353	0.7806	0.998796	no
ENSG00000072609	ENSG00000072609	CHFR	chr12:132768908-132956306	Control	TC32	OK	102.634	78.2379	-0.391566	-0.413013	0.65915	0.998796	no
ENSG00000072682	ENSG00000072682	P4HA2	chr5:132184875-132395614	Control	TC32	OK	2.5789	4.21784	0.709747	0.412791	0.42695	0.998796	no
ENSG00000072694	ENSG00000072694	FCGR2B	chr1:161663146-161678654	Control	TC32	OK	137.852	102.323	-0.42999	-1.25644	0.13545	0.998796	no
ENSG00000072736	ENSG00000072736	NFATC3	chr16:67987393-68238102	Control	TC32	OK	67.9911	45.8633	-0.568006	-0.889869	0.20885	0.998796	no
ENSG00000072756	ENSG00000072756	TRNT1	chr3:3126915-3179727	Control	TC32	OK	22.5881	27.971	0.308372	0.295287	0.7277	0.998796	no
ENSG00000072778	ENSG00000072778	ACADVL	chr17:7189889-7225273	Control	TC32	OK	470.397	509.493	0.115186	0.295996	0.7378	0.998796	no
ENSG00000072786	ENSG00000072786	STK10	chr5:172042072-172188386	Control	TC32	OK	117.584	87.3065	-0.429533	-0.763821	0.32345	0.998796	no
ENSG00000072803	ENSG00000072803	FBXW11	chr5:171861548-172006873	Control	TC32	OK	14.3821	13.7313	-0.0668112	-0.118993	0.8459	0.998796	no
ENSG00000072818	ENSG00000072818	ACAP1	chr17:7336528-7351478	Control	TC32	OK	16.8097	13.8801	-0.276279	-0.385412	0.58235	0.998796	no
ENSG00000072840	ENSG00000072840	EVC	chr4:5711196-5893058	Control	TC32	OK	4.88241	6.10698	0.322865	0.439548	0.51205	0.998796	no
ENSG00000072849	ENSG00000072849	DERL2	chr17:5471250-5490814	Control	TC32	OK	29.3815	30.3638	0.0474451	0.0638095	0.93915	0.998796	no
ENSG00000072864	ENSG00000072864	NDE1	chr16:15643266-15857033	Control	TC32	OK	6.62453	4.94578	-0.421619	-0.606704	0.44125	0.998796	no
ENSG00000072958	ENSG00000072958	AP1M1	chr19:16197577-16245907	Control	TC32	OK	64.2205	44.2267	-0.538119	-0.842761	0.3163	0.998796	no
ENSG00000073008	ENSG00000073008	PVR	chr19:44537057-44718759	Control	TC32	OK	10.4576	20.1883	0.948975	1.85125	0.0217	0.551252	no
ENSG00000073050	ENSG00000073050	XRCC1	chr19:43543039-43596135	Control	TC32	OK	22.5176	17.8581	-0.334476	-0.39345	0.6189	0.998796	no
ENSG00000073060	ENSG00000073060	SCARB1	chr12:124776855-124882668	Control	TC32	OK	78.9282	42.8119	-0.882529	-1.9035	0.01525	0.438669	no
ENSG00000073111	ENSG00000073111	MCM2	chr3:127573068-127622436	Control	TC32	OK	5.30743	4.98198	-0.0912936	-0.112538	0.8701	0.998796	no
ENSG00000073169	ENSG00000073169	SELENOO	chr22:50200978-50217616	Control	TC32	FAIL	7.31842	9.14324	0	0	1	1	no
ENSG00000073331	ENSG00000073331	ALPK1	chr4:112274541-112442620	Control	TC32	OK	60.8941	57.7747	-0.0758648	-0.120481	0.88045	0.998796	no
ENSG00000073417	ENSG00000073417	PDE8A	chr15:84980439-85139145	Control	TC32	OK	52.2014	24.7243	-1.07816	-1.0901	0.0687	0.894832	no
ENSG00000073464	ENSG00000073464	CLCN4	chrX:10156944-10237660	Control	TC32	OK	7.02761	1.96635	-1.83751	-2.05035	0.00445	0.218413	no
ENSG00000073578	ENSG00000073578	SDHA	chr5:218240-256700	Control	TC32	OK	117.008	126.963	0.117796	0.25121	0.7574	0.998796	no
ENSG00000073584	ENSG00000073584	SMARCE1	chr17:40624961-40665181	Control	TC32	OK	21.3277	16.8748	-0.337859	-0.587255	0.4323	0.998796	no
ENSG00000073605	ENSG00000073605	GSDMB	chr17:39904594-39919854	Control	TC32	OK	3.01404	3.63736	0.271195	0.286556	0.644	0.998796	no
ENSG00000073614	ENSG00000073614	KDM5A	chr12:280128-442645	Control	TC32	OK	76.9108	60.9992	-0.334394	-0.363381	0.68875	0.998796	no
ENSG00000073711	ENSG00000073711	PPP2R3A	chr3:135965672-136147891	Control	TC32	OK	2.85814	3.62577	0.343213	0.507013	0.44845	0.998796	no
ENSG00000073737	ENSG00000073737	DHRS9	chr2:169064788-169096167	Control	TC32	OK	16.3675	5.07565	-1.68917	-2.97535	0.00115	0.0888913	no
ENSG00000073792	ENSG00000073792	IGF2BP2	chr3:185643738-185825056	Control	TC32	OK	3.87968	4.68991	0.273623	0.394439	0.4794	0.998796	no
ENSG00000073803	ENSG00000073803	MAP3K13	chr3:185282940-185499057	Control	TC32	OK	6.13555	7.79106	0.344627	0.155912	0.89765	0.998796	no
ENSG00000073849	ENSG00000073849	ST6GAL1	chr3:186930484-187078553	Control	TC32	OK	63.335	34.2928	-0.885097	-1.56273	0.01575	0.446827	no
ENSG00000073905	ENSG00000073905	VDAC1P1	chrX:80929499-80930347	Control	TC32	OK	106.154	109.836	0.0491954	0.152788	0.8579	0.998796	no
ENSG00000073910	ENSG00000073910	FRY	chr13:31846712-32299122	Control	TC32	OK	14.9475	8.40475	-0.830624	-0.960804	0.1745	0.998796	no
ENSG00000073921	ENSG00000073921	PICALM	chr11:85957683-86069882	Control	TC32	OK	484.774	417.569	-0.215297	-0.316227	0.68425	0.998796	no
ENSG00000073969	ENSG00000073969	NSF	chr17:46590668-46757464	Control	TC32	OK	6.75044	6.98006	0.048257	0.0659859	0.9132	0.998796	no
ENSG00000074054	ENSG00000074054	CLASP1	chr2:121337775-121649587	Control	TC32	OK	25.5804	19.6704	-0.379014	-0.553159	0.43745	0.998796	no
ENSG00000074071	ENSG00000074071	MRPS34	chr16:1771889-1773155	Control	TC32	OK	56.7948	43.6599	-0.37945	-1.00078	0.24595	0.998796	no
ENSG00000074181	ENSG00000074181	NOTCH3	chr19:15159037-15200981	Control	TC32	OK	16.2712	17.0377	0.0664078	0.0927677	0.87305	0.998796	no
ENSG00000074201	ENSG00000074201	CLNS1A	chr11:77514935-77637805	Control	TC32	OK	48.8119	32.2385	-0.598446	-0.9431	0.2416	0.998796	no
ENSG00000074266	ENSG00000074266	EED	chr11:86244543-86278813	Control	TC32	OK	8.82298	9.46006	0.100584	0.191638	0.82455	0.998796	no
ENSG00000074319	ENSG00000074319	TSG101	chr11:18455823-18527232	Control	TC32	OK	40.0555	54.9511	0.456147	0.631995	0.44075	0.998796	no
ENSG00000074356	ENSG00000074356	NCBP3	chr17:3802164-3846251	Control	TC32	OK	15.6225	16.5334	0.0817625	0.123781	0.8835	0.998796	no
ENSG00000074370	ENSG00000074370	ATP2A3	chr17:3923869-3964464	Control	TC32	OK	63.5913	40.436	-0.653189	-1.28033	0.097	0.989421	no
ENSG00000074416	ENSG00000074416	MGLL	chr3:127689061-127823250	Control	TC32	OK	149.752	96.5156	-0.633744	-1.22068	0.0948	0.977729	no
ENSG00000074582	ENSG00000074582	BCS1L	chr2:218637915-218663443	Control	TC32	OK	21.0002	23.3553	0.153348	0.210982	0.8161	0.998796	no
ENSG00000074603	ENSG00000074603	DPP8	chr15:65442462-65517704	Control	TC32	OK	18.5559	23.6767	0.351593	0.557723	0.4775	0.998796	no
ENSG00000074621	ENSG00000074621	SLC24A1	chr15:65611365-65891991	Control	TC32	OK	9.2797	7.84021	-0.243186	-0.19417	0.7057	0.998796	no
ENSG00000074657	ENSG00000074657	ZNF532	chr18:58862599-58986480	Control	TC32	OK	8.70955	13.132	0.59242	0.806547	0.29325	0.998796	no
ENSG00000074660	ENSG00000074660	SCARF1	chr17:1633857-1645747	Control	TC32	OK	8.38621	13.7414	0.712437	1.61566	0.05215	0.813921	no
ENSG00000074695	ENSG00000074695	LMAN1	chr18:59327822-59359962	Control	TC32	OK	40.5404	26.7575	-0.599417	-0.957913	0.2416	0.998796	no
ENSG00000074696	ENSG00000074696	HACD3	chr15:65530417-65578352	Control	TC32	OK	24.4176	24.5392	0.00716576	0.0155373	0.97935	0.998796	no
ENSG00000074755	ENSG00000074755	ZZEF1	chr17:4004444-4143020	Control	TC32	OK	64.8879	55.8942	-0.21525	-0.308492	0.69405	0.998796	no
ENSG00000074800	ENSG00000074800	ENO1	chr1:8860999-8879894	Control	TC32	FAIL	332.663	406.062	0	0	1	1	no
ENSG00000074842	ENSG00000074842	MYDGF	chr19:4639517-4670370	Control	TC32	OK	80.6005	59.1148	-0.447268	-0.74291	0.3579	0.998796	no
ENSG00000074855	ENSG00000074855	ANO8	chr19:17292130-17334829	Control	TC32	OK	5.11352	4.25824	-0.264059	-0.195926	0.7761	0.998796	no
ENSG00000074935	ENSG00000074935	TUBE1	chr6:112054071-112087529	Control	TC32	OK	6.93044	9.18253	0.405945	0.593777	0.49855	0.998796	no
ENSG00000074964	ENSG00000074964	ARHGEF10L	chr1:17539834-17697874	Control	TC32	OK	35.4221	38.6176	0.124612	0.205212	0.802	0.998796	no
ENSG00000075089	ENSG00000075089	ACTR6	chr12:100156356-100267079	Control	TC32	OK	4.52306	6.11813	0.435791	0.541679	0.52495	0.998796	no
ENSG00000075131	ENSG00000075131	TIPIN	chr15:66336205-66386746	Control	TC32	OK	1.64187	3.83547	1.22406	1.30408	0.1656	0.998796	no
ENSG00000075142	ENSG00000075142	SRI	chr7:88205117-88306891	Control	TC32	OK	20.8617	17.458	-0.256973	-0.511855	0.54155	0.998796	no
ENSG00000075151	ENSG00000075151	EIF4G3	chr1:20806291-21176888	Control	TC32	OK	46.2242	42.1778	-0.132165	-0.28189	0.6976	0.998796	no
ENSG00000075188	ENSG00000075188	NUP37	chr12:102063354-102120124	Control	TC32	OK	5.72167	10.1067	0.820802	1.27013	0.15545	0.998796	no
ENSG00000075223	ENSG00000075223	SEMA3C	chr7:80742537-80922359	Control	TC32	OK	85.6324	66.2991	-0.369167	-0.541897	0.5029	0.998796	no
ENSG00000075234	ENSG00000075234	TTC38	chr22:46267960-46294008	Control	TC32	OK	12.2012	10.2781	-0.24745	-0.384723	0.6239	0.998796	no
ENSG00000075239	ENSG00000075239	ACAT1	chr11:108008732-108147776	Control	TC32	OK	65.5149	63.7117	-0.0402635	-0.0641118	0.93935	0.998796	no
ENSG00000075240	ENSG00000075240	GRAMD4	chr22:46576011-46679790	Control	TC32	OK	36.7284	20.4997	-0.841294	-1.12483	0.0524	0.813921	no
ENSG00000075275	ENSG00000075275	CELSR1	chr22:46360833-46537170	Control	TC32	OK	11.6481	12.2777	0.0759467	0.139252	0.8507	0.998796	no
ENSG00000075292	ENSG00000075292	ZNF638	chr2:71276560-71435069	Control	TC32	OK	70.1109	70.2651	0.00316946	0.00575272	0.99405	0.998826	no
ENSG00000075303	ENSG00000075303	SLC25A40	chr7:87833567-87909541	Control	TC32	OK	49.1174	61.0843	0.314569	0.510789	0.548	0.998796	no
ENSG00000075336	ENSG00000075336	TIMM21	chr18:74148510-74160530	Control	TC32	OK	25.767	28.6619	0.153608	0.342914	0.6853	0.998796	no
ENSG00000075391	ENSG00000075391	RASAL2	chr1:178094140-178499634	Control	TC32	OK	47.0739	50.472	0.100554	0.148906	0.85035	0.998796	no
ENSG00000075399	ENSG00000075399	VPS9D1	chr16:89707133-89816657	Control	TC32	OK	8.28968	7.25834	-0.191677	-0.211353	0.77055	0.998796	no
ENSG00000075407	ENSG00000075407	ZNF37A	chr10:38094333-38378505	Control	TC32	OK	9.29529	10.3099	0.14946	0.222122	0.7248	0.998796	no
ENSG00000075413	ENSG00000075413	MARK3	chr14:103385391-103503831	Control	TC32	OK	62.3585	60.6418	-0.0402744	-0.0879896	0.91445	0.998796	no
ENSG00000075415	ENSG00000075415	SLC25A3	chr12:98593590-98606379	Control	TC32	OK	272.874	225.02	-0.278184	-0.706209	0.41335	0.998796	no
ENSG00000075420	ENSG00000075420	FNDC3B	chr3:172039627-172401665	Control	TC32	OK	115.307	115.171	-0.00171054	-0.00291926	0.99715	0.999051	no
ENSG00000075426	ENSG00000075426	FOSL2	chr2:28384408-28417312	Control	TC32	OK	32.8879	91.1193	1.4702	3.88867	5e-05	0.00772968	yes
ENSG00000075539	ENSG00000075539	FRYL	chr4:48497360-48780322	Control	TC32	FAIL	35.9357	39.5372	0	0	1	1	no
ENSG00000075568	ENSG00000075568	TMEM131	chr2:97756332-97995891	Control	TC32	OK	35.7346	28.8242	-0.310045	-0.409079	0.54415	0.998796	no
ENSG00000075618	ENSG00000075618	FSCN1	chr7:5592822-5606655	Control	TC32	OK	3.04721	6.2173	1.0288	2.20017	0.011	0.363427	no
ENSG00000075624	ENSG00000075624	ACTB	chr7:5527146-5563784	Control	TC32	OK	5258.3	3852.24	-0.448899	-0.791441	0.33235	0.998796	no
ENSG00000075651	ENSG00000075651	PLD1	chr3:171600404-171810950	Control	TC32	OK	39.8229	48.2406	0.276648	0.20939	0.65945	0.998796	no
ENSG00000075711	ENSG00000075711	DLG1	chr3:197042559-197303747	Control	TC32	OK	26.0165	28.0458	0.108354	0.203686	0.8108	0.998796	no
ENSG00000075785	ENSG00000075785	RAB7A	chr3:128726121-128814796	Control	TC32	OK	334.247	290.806	-0.200857	-0.423644	0.6117	0.998796	no
ENSG00000075790	ENSG00000075790	BCAP29	chr7:107579556-107629550	Control	TC32	OK	8.54648	9.0335	0.079955	0.0972369	0.91265	0.998796	no
ENSG00000075826	ENSG00000075826	SEC31B	chr10:100486641-100559998	Control	TC32	OK	8.17497	6.34713	-0.36511	-0.207557	0.70295	0.998796	no
ENSG00000075856	ENSG00000075856	SART3	chr12:108515184-108561400	Control	TC32	OK	39.7779	43.5872	0.131937	0.22754	0.79845	0.998796	no
ENSG00000075884	ENSG00000075884	ARHGAP15	chr2:143091361-143776073	Control	TC32	OK	65.1463	35.1263	-0.89113	-1.49823	0.09145	0.968399	no
ENSG00000075914	ENSG00000075914	EXOSC7	chr3:44915256-45036071	Control	TC32	OK	28.6717	20.8371	-0.460471	-0.330089	0.5163	0.998796	no
ENSG00000075945	ENSG00000075945	KIFAP3	chr1:169921325-170085208	Control	TC32	OK	5.90343	4.87001	-0.277628	-0.319184	0.6371	0.998796	no
ENSG00000075975	ENSG00000075975	MKRN2	chr3:12484431-12664226	Control	TC32	OK	10.7213	9.26772	-0.210189	-0.274342	0.7547	0.998796	no
ENSG00000076003	ENSG00000076003	MCM6	chr2:135839625-135876426	Control	TC32	OK	8.84228	3.8597	-1.19593	-1.8176	0.0204	0.529393	no
ENSG00000076043	ENSG00000076043	REXO2	chr11:114391442-114450279	Control	TC32	OK	13.2598	18.6069	0.488778	0.656089	0.47815	0.998796	no
ENSG00000076053	ENSG00000076053	RBM7	chr11:114391442-114450279	Control	TC32	OK	12.089	10.4294	-0.213036	-0.313444	0.70315	0.998796	no
ENSG00000076067	ENSG00000076067	RBMS2	chr12:56521928-56636816	Control	TC32	OK	5.05395	4.23662	-0.254499	-0.0464807	0.7443	0.998796	no
ENSG00000076108	ENSG00000076108	BAZ2A	chr12:56521928-56636816	Control	TC32	OK	82.1452	76.5678	-0.101437	-0.159684	0.854	0.998796	no
ENSG00000076201	ENSG00000076201	PTPN23	chr3:47381010-47413441	Control	TC32	OK	32.7773	34.1251	0.0581342	0.0552309	0.92935	0.998796	no
ENSG00000076242	ENSG00000076242	MLH1	chr3:36993331-37050918	Control	TC32	OK	33.5057	42.6017	0.346504	0.510066	0.5352	0.998796	no
ENSG00000076248	ENSG00000076248	UNG	chr12:109097573-109110992	Control	TC32	OK	5.12775	3.5526	-0.529452	-0.694977	0.33215	0.998796	no
ENSG00000076321	ENSG00000076321	KLHL20	chr1:173714940-173786702	Control	TC32	OK	13.9515	14.6768	0.0731176	0.127017	0.8797	0.998796	no
ENSG00000076351	ENSG00000076351	SLC46A1	chr17:28357580-28407197	Control	TC32	OK	4.44877	2.49391	-0.835	-0.50351	0.3601	0.998796	no
ENSG00000076356	ENSG00000076356	PLXNA2	chr1:208022241-208244320	Control	TC32	OK	19.0715	11.1245	-0.777676	-0.886302	0.2363	0.998796	no
ENSG00000076382	ENSG00000076382	SPAG5	chr17:28455751-28645454	Control	TC32	OK	5.05878	3.91089	-0.371293	-0.0737995	0.6538	0.998796	no
ENSG00000076513	ENSG00000076513	ANKRD13A	chr12:109999185-110073686	Control	TC32	OK	33.72	28.8212	-0.226472	-0.465059	0.5534	0.998796	no
ENSG00000076554	ENSG00000076554	TPD52	chr8:79918716-80231232	Control	TC32	OK	3.27138	8.05199	1.29945	0.96292	0.20185	0.998796	no
ENSG00000076555	ENSG00000076555	ACACB	chr12:109111217-109268226	Control	TC32	OK	16.515	10.2748	-0.684668	-0.728931	0.3678	0.998796	no
ENSG00000076604	ENSG00000076604	TRAF4	chr17:28743983-28750958	Control	TC32	OK	12.2301	9.81109	-0.317945	-0.476591	0.5226	0.998796	no
ENSG00000076641	ENSG00000076641	PAG1	chr8:80967809-81112068	Control	TC32	OK	33.2607	34.1441	0.0378206	0.0300684	0.95665	0.998796	no
ENSG00000076650	ENSG00000076650	GPATCH1	chr19:33080879-33130542	Control	TC32	OK	6.76086	5.37066	-0.332108	-0.41097	0.5924	0.998796	no
ENSG00000076662	ENSG00000076662	ICAM3	chr19:10304802-10339823	Control	TC32	OK	10.2969	6.66048	-0.628509	-0.631343	0.406	0.998796	no
ENSG00000076685	ENSG00000076685	NT5C2	chr10:102918292-103193306	Control	TC32	OK	57.1404	59.319	0.0539813	0.065368	0.92765	0.998796	no
ENSG00000076716	ENSG00000076716	GPC4	chrX:133300102-133415490	Control	TC32	OK	4.73034	3.299	-0.519913	-1.30264	0.13315	0.998796	no
ENSG00000076770	ENSG00000076770	MBNL3	chrX:132203023-132489968	Control	TC32	OK	11.0212	8.28469	-0.411765	-0.357431	0.5402	0.998796	no
ENSG00000076864	ENSG00000076864	RAP1GAP	chr1:21596214-21669363	Control	TC32	OK	21.915	16.0863	-0.446085	-0.701269	0.28755	0.998796	no
ENSG00000076924	ENSG00000076924	XAB2	chr19:7619524-7629565	Control	TC32	OK	15.7115	16.6355	0.0824397	0.160073	0.83545	0.998796	no
ENSG00000076928	ENSG00000076928	ARHGEF1	chr19:41883160-41930150	Control	TC32	OK	110.498	99.098	-0.157089	-0.304176	0.72315	0.998796	no
ENSG00000076944	ENSG00000076944	STXBP2	chr19:7629736-7647873	Control	TC32	OK	326.31	288.375	-0.178297	-0.461804	0.58235	0.998796	no
ENSG00000076984	ENSG00000076984	MAP2K7	chr19:7903842-7914478	Control	TC32	OK	33.518	38.5312	0.201091	0.133634	0.76215	0.998796	no
ENSG00000077044	ENSG00000077044	DGKD	chr2:233354506-233472104	Control	TC32	OK	12.2351	9.14194	-0.420457	-0.539408	0.3735	0.998796	no
ENSG00000077097	ENSG00000077097	TOP2B	chr3:25174331-25664939	Control	TC32	OK	45.0911	46.7869	0.0532597	0.0960631	0.88635	0.998796	no
ENSG00000077147	ENSG00000077147	TM9SF3	chr10:96518108-96587452	Control	TC32	OK	63.7292	71.6114	0.168233	0.248294	0.773	0.998796	no
ENSG00000077150	ENSG00000077150	NFKB2	chr10:102394109-102402529	Control	TC32	OK	18.2163	65.6938	1.85053	2.95966	0.00115	0.0888913	no
ENSG00000077157	ENSG00000077157	PPP1R12B	chr1:202348698-202710417	Control	TC32	OK	14.8307	11.4454	-0.373817	-0.281924	0.59365	0.998796	no
ENSG00000077232	ENSG00000077232	DNAJC10	chr2:182716040-182794464	Control	TC32	OK	56.9425	99.7615	0.808977	1.45619	0.08165	0.926745	no
ENSG00000077235	ENSG00000077235	GTF3C1	chr16:27459554-27549913	Control	TC32	OK	32.3467	28.7234	-0.171393	-0.219368	0.78195	0.998796	no
ENSG00000077238	ENSG00000077238	IL4R	chr16:27313386-27364778	Control	TC32	OK	56.4803	53.7699	-0.070951	-0.134291	0.8615	0.998796	no
ENSG00000077254	ENSG00000077254	USP33	chr1:77695986-77759852	Control	TC32	OK	46.0144	37.2632	-0.304334	-0.576143	0.47385	0.998796	no
ENSG00000077312	ENSG00000077312	SNRPA	chr19:40691528-40765389	Control	TC32	OK	33.2069	29.8825	-0.152182	-0.242976	0.74775	0.998796	no
ENSG00000077348	ENSG00000077348	EXOSC5	chr19:41262495-41425005	Control	TC32	OK	10.6325	8.43737	-0.333619	-0.122095	0.83945	0.998796	no
ENSG00000077380	ENSG00000077380	DYNC1I2	chr2:171687408-171748420	Control	TC32	OK	21.4257	17.4505	-0.296076	-0.532932	0.52285	0.998796	no
ENSG00000077420	ENSG00000077420	APBB1IP	chr10:26438202-26567803	Control	TC32	OK	37.8988	20.4731	-0.888421	-2.47631	0.00355	0.19005	no
ENSG00000077454	ENSG00000077454	LRCH4	chr7:100572227-100608175	Control	TC32	OK	51.5667	37.5321	-0.458312	-0.882583	0.297	0.998796	no
ENSG00000077458	ENSG00000077458	FAM76B	chr11:95768941-95832693	Control	TC32	OK	9.91394	14.879	0.585751	0.630992	0.47075	0.998796	no
ENSG00000077463	ENSG00000077463	SIRT6	chr19:4174108-4182604	Control	TC32	OK	12.7564	14.142	0.148763	0.27303	0.72285	0.998796	no
ENSG00000077514	ENSG00000077514	POLD3	chr11:74491711-74669117	Control	TC32	OK	12.17	9.43053	-0.367921	-0.606904	0.4447	0.998796	no
ENSG00000077549	ENSG00000077549	CAPZB	chr1:19338775-19485539	Control	TC32	OK	136.5	143.639	0.073546	0.175514	0.8311	0.998796	no
ENSG00000077585	ENSG00000077585	GPR137B	chr1:236142504-236281985	Control	TC32	OK	38.9823	35.5543	-0.132795	-0.298082	0.72295	0.998796	no
ENSG00000077684	ENSG00000077684	JADE1	chr4:128809622-129116640	Control	TC32	OK	3.37809	3.44086	0.0265608	0.0365774	0.9566	0.998796	no
ENSG00000077713	ENSG00000077713	SLC25A43	chrX:119399059-119454478	Control	TC32	OK	17.0838	14.8984	-0.197466	-0.4219	0.6122	0.998796	no
ENSG00000077721	ENSG00000077721	UBE2A	chrX:119574466-119605895	Control	TC32	OK	40.6938	34.1721	-0.251993	-0.529314	0.51915	0.998796	no
ENSG00000077782	ENSG00000077782	FGFR1	chr8:38411137-38468834	Control	TC32	OK	26.5451	24.8575	-0.0947641	-0.156888	0.8497	0.998796	no
ENSG00000078043	ENSG00000078043	PIAS2	chr18:46803223-47102243	Control	TC32	OK	13.542	9.35643	-0.533406	-0.690628	0.2206	0.998796	no
ENSG00000078061	ENSG00000078061	ARAF	chrX:47561099-47630305	Control	TC32	OK	38.7033	48.6122	0.328862	0.50073	0.49585	0.998796	no
ENSG00000078070	ENSG00000078070	MCCC1	chr3:183015217-183116075	Control	TC32	OK	21.0118	16.0249	-0.390883	-0.4246	0.5096	0.998796	no
ENSG00000078081	ENSG00000078081	LAMP3	chr3:183122212-183163839	Control	TC32	OK	4.14354	26.8242	2.6946	5.98775	5e-05	0.00772968	yes
ENSG00000078124	ENSG00000078124	ACER3	chr11:76860866-77026797	Control	TC32	OK	21.8645	18.7905	-0.218583	-0.348825	0.57925	0.998796	no
ENSG00000078140	ENSG00000078140	UBE2K	chr4:39698043-39782792	Control	TC32	OK	38.6205	50.2464	0.379653	0.655891	0.45025	0.998796	no
ENSG00000078142	ENSG00000078142	PIK3C3	chr18:41955205-42087830	Control	TC32	OK	36.1334	34.163	-0.0808991	-0.142337	0.86675	0.998796	no
ENSG00000078177	ENSG00000078177	N4BP2	chr4:40042916-40158252	Control	TC32	OK	5.45945	7.04603	0.368054	0.652348	0.3689	0.998796	no
ENSG00000078237	ENSG00000078237	TIGAR	chr12:4307762-4354593	Control	TC32	OK	17.7841	14.8602	-0.259132	-0.733279	0.39295	0.998796	no
ENSG00000078269	ENSG00000078269	SYNJ2	chr6:157981886-158099176	Control	TC32	OK	7.75893	11.7932	0.604024	1.05197	0.19205	0.998796	no
ENSG00000078304	ENSG00000078304	PPP2R5C	chr14:101761797-101927989	Control	TC32	OK	48.5589	60.8112	0.324602	0.529239	0.5218	0.998796	no
ENSG00000078369	ENSG00000078369	GNB1	chr1:1785284-1891117	Control	TC32	OK	141.561	132.009	-0.100788	-0.200696	0.8055	0.998796	no
ENSG00000078403	ENSG00000078403	MLLT10	chr10:21513477-21743630	Control	TC32	OK	39.8491	39.6634	-0.00673813	-0.00668553	0.99425	0.998826	no
ENSG00000078487	ENSG00000078487	ZCWPW1	chr7:100400825-100434126	Control	TC32	OK	8.03399	5.68346	-0.499347	-0.473515	0.607	0.998796	no
ENSG00000078618	ENSG00000078618	NRDC	chr1:51561865-51878937	Control	TC32	OK	100.039	108.109	0.111918	0.200468	0.81525	0.998796	no
ENSG00000078668	ENSG00000078668	VDAC3	chr8:42391623-42405897	Control	TC32	OK	36.9719	46.5484	0.332304	0.889925	0.2879	0.998796	no
ENSG00000078674	ENSG00000078674	PCM1	chr8:17922839-18029944	Control	TC32	OK	195.142	125.205	-0.640235	-1.00177	0.25015	0.998796	no
ENSG00000078687	ENSG00000078687	TNRC6C	chr17:77959239-78142968	Control	TC32	OK	3.44147	5.02978	0.547471	0.182324	0.59145	0.998796	no
ENSG00000078699	ENSG00000078699	CBFA2T2	chr20:33490074-33650036	Control	TC32	OK	7.68209	7.7179	0.00670948	0.014399	0.9851	0.998796	no
ENSG00000078747	ENSG00000078747	ITCH	chr20:34363234-34511393	Control	TC32	OK	80.243	84.637	0.0769131	0.0579926	0.9161	0.998796	no
ENSG00000078804	ENSG00000078804	TP53INP2	chr20:34560541-34825649	Control	TC32	OK	4.66022	8.43145	0.855383	0.663388	0.2477	0.998796	no
ENSG00000078808	ENSG00000078808	SDF4	chr1:1216907-1232031	Control	TC32	OK	102.936	105.53	0.035901	0.091062	0.9155	0.998796	no
ENSG00000078902	ENSG00000078902	TOLLIP	chr11:1274370-1309654	Control	TC32	OK	36.4891	30.9351	-0.238221	-0.480314	0.4677	0.998796	no
ENSG00000078967	ENSG00000078967	UBE2D4	chr7:43926437-44019175	Control	TC32	OK	12.6793	13.1851	0.0564417	0.0806667	0.91565	0.998796	no
ENSG00000079134	ENSG00000079134	THOC1	chr18:158382-268050	Control	TC32	OK	30.6114	29.3264	-0.061871	-0.089001	0.9197	0.998796	no
ENSG00000079215	ENSG00000079215	SLC1A3	chr5:36606354-36725195	Control	TC32	OK	104.717	171.468	0.711439	1.32934	0.12225	0.998796	no
ENSG00000079246	ENSG00000079246	XRCC5	chr2:216107463-216206303	Control	TC32	OK	181.916	164.345	-0.146549	-0.299406	0.72535	0.998796	no
ENSG00000079263	ENSG00000079263	SP140	chr2:230121369-230313215	Control	TC32	OK	6.63699	5.05756	-0.392089	-0.312468	0.74585	0.998796	no
ENSG00000079277	ENSG00000079277	MKNK1	chr1:46538695-46616891	Control	TC32	OK	89.6787	86.5675	-0.0509407	-0.0812367	0.9233	0.998796	no
ENSG00000079308	ENSG00000079308	TNS1	chr2:217799587-218010421	Control	TC32	OK	46.1316	29.5429	-0.642943	-0.93504	0.13545	0.998796	no
ENSG00000079313	ENSG00000079313	REXO1	chr19:1815245-1848463	Control	TC32	OK	18.3599	20.0379	0.126174	0.152927	0.80385	0.998796	no
ENSG00000079332	ENSG00000079332	SAR1A	chr10:70147288-70170523	Control	TC32	OK	24.2257	19.8437	-0.287852	-0.430867	0.5385	0.998796	no
ENSG00000079335	ENSG00000079335	CDC14A	chr1:100344476-100520278	Control	TC32	OK	4.65461	3.11418	-0.579805	-0.721885	0.41205	0.998796	no
ENSG00000079337	ENSG00000079337	RAPGEF3	chr12:47706084-47837898	Control	TC32	OK	15.2957	3.73512	-2.0339	-1.54079	0.0129	0.396308	no
ENSG00000079387	ENSG00000079387	SENP1	chr12:48042897-48146404	Control	TC32	OK	5.60155	6.46691	0.207251	0.199216	0.7342	0.998796	no
ENSG00000079432	ENSG00000079432	CIC	chr19:42268536-42295797	Control	TC32	OK	19.8512	19.8771	0.0018811	0.00268892	0.99645	0.999051	no
ENSG00000079459	ENSG00000079459	FDFT1	chr8:11795572-11839309	Control	TC32	OK	47.239	43.4226	-0.121531	-0.238783	0.78365	0.998796	no
ENSG00000079462	ENSG00000079462	PAFAH1B3	chr19:42297032-42310821	Control	TC32	OK	4.69362	3.26966	-0.52156	-0.73626	0.37375	0.998796	no
ENSG00000079616	ENSG00000079616	KIF22	chr16:29790718-29805385	Control	TC32	OK	9.64958	8.04897	-0.261663	-0.592178	0.4881	0.998796	no
ENSG00000079739	ENSG00000079739	PGM1	chr1:63440769-63660245	Control	TC32	OK	7.58437	4.52334	-0.745641	-1.16746	0.1017	0.998796	no
ENSG00000079785	ENSG00000079785	DDX1	chr2:15591177-15631111	Control	TC32	OK	26.4855	37.41	0.49822	0.990638	0.2379	0.998796	no
ENSG00000079805	ENSG00000079805	DNM2	chr19:10718078-10836318	Control	TC32	OK	146.401	126.962	-0.205535	-0.36421	0.66165	0.998796	no
ENSG00000079819	ENSG00000079819	EPB41L2	chr6:130839346-131063322	Control	TC32	OK	59.5222	50.906	-0.225591	-0.411525	0.626	0.998796	no
ENSG00000079950	ENSG00000079950	STX7	chr6:132445866-132513198	Control	TC32	OK	41.097	37.3968	-0.136118	-0.170504	0.8333	0.998796	no
ENSG00000079974	ENSG00000079974	RABL2B	chr22:50756947-50801309	Control	TC32	OK	18.3902	16.57	-0.150363	-0.224929	0.76	0.998796	no
ENSG00000079999	ENSG00000079999	KEAP1	chr19:10486119-10503741	Control	TC32	OK	43.4838	64.3304	0.565022	1.1165	0.1876	0.998796	no
ENSG00000080189	ENSG00000080189	SLC35C2	chr20:46345979-46364458	Control	TC32	OK	20.0605	20.0757	0.00109254	0.00232795	0.998	0.99931	no
ENSG00000080200	ENSG00000080200	CRYBG3	chr3:97822039-97972457	Control	TC32	OK	9.29871	10.6068	0.189891	0.558972	0.51635	0.998796	no
ENSG00000080298	ENSG00000080298	RFX3	chr9:3218296-3526004	Control	TC32	OK	8.1289	6.18694	-0.393835	-0.395532	0.6138	0.998796	no
ENSG00000080345	ENSG00000080345	RIF1	chr2:151409882-151734487	Control	TC32	OK	18.9978	22.7806	0.261978	0.367077	0.587	0.998796	no
ENSG00000080371	ENSG00000080371	RAB21	chr12:71754873-71800285	Control	TC32	OK	31.8956	32.6575	0.0340576	0.0471863	0.95525	0.998796	no
ENSG00000080503	ENSG00000080503	SMARCA2	chr9:1980289-2193624	Control	TC32	OK	106.378	70.7173	-0.589065	-1.05268	0.2303	0.998796	no
ENSG00000080546	ENSG00000080546	SESN1	chr6:108986436-109094819	Control	TC32	OK	13.2353	10.1748	-0.379399	-0.614294	0.45395	0.998796	no
ENSG00000080561	ENSG00000080561	MID2	chrX:107825754-107935980	Control	TC32	OK	12.1616	5.75157	-1.0803	-1.72061	0.03565	0.706863	no
ENSG00000080603	ENSG00000080603	SRCAP	chr16:30697706-30776307	Control	TC32	OK	39.2116	29.1838	-0.426113	-0.626329	0.3038	0.998796	no
ENSG00000080608	ENSG00000080608	PUM3	chr9:2717501-2844241	Control	TC32	OK	15.4928	23.8855	0.624533	0.918425	0.2766	0.998796	no
ENSG00000080802	ENSG00000080802	CNOT4	chr7:135361794-135510127	Control	TC32	FAIL	14.5793	12.5611	0	0	1	1	no
ENSG00000080815	ENSG00000080815	PSEN1	chr14:73136417-73223691	Control	TC32	OK	59.0837	69.9978	0.24455	0.485576	0.51975	0.998796	no
ENSG00000080819	ENSG00000080819	CPOX	chr3:98497603-98593723	Control	TC32	OK	16.0451	8.5418	-0.909516	-0.962203	0.2305	0.998796	no
ENSG00000080822	ENSG00000080822	CLDND1	chr3:98497603-98593723	Control	TC32	OK	22.7393	40.4199	0.829876	1.32217	0.1094	0.998796	no
ENSG00000080824	ENSG00000080824	HSP90AA1	chr14:102080737-102305200	Control	TC32	OK	185.705	213.842	0.203533	0.427021	0.50075	0.998796	no
ENSG00000080839	ENSG00000080839	RBL1	chr20:36996348-37097178	Control	TC32	OK	8.20321	8.00784	-0.0347764	-0.0522666	0.9501	0.998796	no
ENSG00000080845	ENSG00000080845	DLGAP4	chr20:36306335-36573391	Control	TC32	OK	37.1438	33.3416	-0.155798	-0.297715	0.70895	0.998796	no
ENSG00000080947	ENSG00000080947	CROCCP3	chr1:16460947-16499257	Control	TC32	OK	3.16532	2.09929	-0.592454	-0.6087	0.39105	0.998796	no
ENSG00000081014	ENSG00000081014	AP4E1	chr15:50908671-51005900	Control	TC32	OK	7.7356	9.06501	0.228797	0.488279	0.4925	0.998796	no
ENSG00000081019	ENSG00000081019	RSBN1	chr1:113761831-113914086	Control	TC32	OK	7.94036	7.13282	-0.154732	-0.176603	0.79565	0.998796	no
ENSG00000081041	ENSG00000081041	CXCL2	chr4:74097034-74099293	Control	TC32	OK	5.28586	16.2275	1.61823	2.57169	0.0097	0.330681	no
ENSG00000081059	ENSG00000081059	TCF7	chr5:134114710-134371047	Control	TC32	OK	5.03781	6.19874	0.299179	0.182434	0.74495	0.998796	no
ENSG00000081087	ENSG00000081087	OSTM1	chr6:108041408-108165854	Control	TC32	OK	29.9066	55.0544	0.880393	1.49802	0.082	0.928167	no
ENSG00000081154	ENSG00000081154	PCNP	chr3:101574094-101594437	Control	TC32	OK	27.5483	29.3057	0.08922	0.0913218	0.9166	0.998796	no
ENSG00000081177	ENSG00000081177	EXD2	chr14:69183019-69359308	Control	TC32	OK	5.69565	3.94458	-0.529991	-0.835758	0.23735	0.998796	no
ENSG00000081181	ENSG00000081181	ARG2	chr14:67619797-67695814	Control	TC32	OK	4.79611	4.54584	-0.0773191	-0.0393705	0.9539	0.998796	no
ENSG00000081189	ENSG00000081189	MEF2C	chr5:88507545-89466398	Control	TC32	OK	7.46237	5.04594	-0.564512	-0.665314	0.3303	0.998796	no
ENSG00000081237	ENSG00000081237	PTPRC	chr1:198638456-198757476	Control	TC32	OK	108.901	101.368	-0.103407	-0.19848	0.81425	0.998796	no
ENSG00000081307	ENSG00000081307	UBA5	chr3:132558137-132874223	Control	TC32	OK	10.524	11.7686	0.161266	0.171862	0.80585	0.998796	no
ENSG00000081320	ENSG00000081320	STK17B	chr2:196133565-196176503	Control	TC32	OK	13.7402	9.20579	-0.577792	-1.14321	0.07865	0.916655	no
ENSG00000081386	ENSG00000081386	ZNF510	chr9:96755864-96778129	Control	TC32	OK	5.05202	3.49041	-0.533464	-0.593867	0.3575	0.998796	no
ENSG00000081665	ENSG00000081665	ZNF506	chr19:19757365-19836073	Control	TC32	OK	9.73622	8.49833	-0.196182	-0.350778	0.64065	0.998796	no
ENSG00000081692	ENSG00000081692	JMJD4	chr1:227728538-227781231	Control	TC32	OK	7.85912	7.3022	-0.106035	-0.12735	0.8781	0.998796	no
ENSG00000081721	ENSG00000081721	DUSP12	chr1:161749757-161757238	Control	TC32	OK	10.2365	16.9674	0.729037	1.223	0.14725	0.998796	no
ENSG00000081760	ENSG00000081760	AACS	chr12:125065378-125143333	Control	TC32	OK	4.89536	4.61217	-0.0859702	-0.142959	0.83955	0.998796	no
ENSG00000081791	ENSG00000081791	KIAA0141	chr5:141923807-141942047	Control	TC32	OK	36.083	28.7639	-0.327059	-0.706297	0.39305	0.998796	no
ENSG00000081870	ENSG00000081870	HSPB11	chr1:53916573-53945929	Control	TC32	OK	10.2743	12.7626	0.312884	0.616904	0.4656	0.998796	no
ENSG00000081913	ENSG00000081913	PHLPP1	chr18:62715449-62980433	Control	TC32	OK	3.48401	2.89424	-0.267564	-0.265226	0.68055	0.998796	no
ENSG00000082014	ENSG00000082014	SMARCD3	chr7:151232488-151277896	Control	TC32	OK	10.6576	4.35495	-1.29116	-1.04327	0.15435	0.998796	no
ENSG00000082068	ENSG00000082068	WDR70	chr5:37379211-37753435	Control	TC32	OK	21.537	18.4684	-0.221759	-0.300468	0.7249	0.998796	no
ENSG00000082074	ENSG00000082074	FYB1	chr5:39105254-39274528	Control	TC32	OK	33.1702	24.4842	-0.438037	-0.769903	0.3334	0.998796	no
ENSG00000082146	ENSG00000082146	STRADB	chr2:201377206-201480846	Control	TC32	OK	10.6058	7.28236	-0.54238	-0.359149	0.6539	0.998796	no
ENSG00000082153	ENSG00000082153	BZW1	chr2:200678232-200827338	Control	TC32	OK	38.3069	42.3134	0.143509	0.155258	0.83285	0.998796	no
ENSG00000082212	ENSG00000082212	ME2	chr18:50878733-50954257	Control	TC32	OK	27.4972	33.565	0.287674	0.702195	0.3942	0.998796	no
ENSG00000082213	ENSG00000082213	C5orf22	chr5:31532265-31555058	Control	TC32	OK	14.9355	21.3326	0.514313	0.937825	0.26755	0.998796	no
ENSG00000082258	ENSG00000082258	CCNT2	chr2:134735463-134959342	Control	TC32	OK	23.5079	24.8123	0.0779105	0.136676	0.86665	0.998796	no
ENSG00000082269	ENSG00000082269	FAM135A	chr6:70412827-70561174	Control	TC32	OK	6.15611	4.94381	-0.316397	-0.348329	0.56325	0.998796	no
ENSG00000082397	ENSG00000082397	EPB41L3	chr18:5392380-5630700	Control	TC32	OK	42.6116	53.5219	0.328885	0.487811	0.56	0.998796	no
ENSG00000082512	ENSG00000082512	TRAF5	chr1:211326614-211374946	Control	TC32	OK	22.6931	13.6919	-0.728934	-1.04119	0.178	0.998796	no
ENSG00000082515	ENSG00000082515	MRPL22	chr5:154941069-154969411	Control	TC32	OK	10.5349	19.0975	0.858203	1.4323	0.0934	0.97246	no
ENSG00000082516	ENSG00000082516	GEMIN5	chr5:154887415-154938209	Control	TC32	OK	8.93885	9.68915	0.116282	0.13123	0.8738	0.998796	no
ENSG00000082641	ENSG00000082641	NFE2L1	chr17:48048328-48061487	Control	TC32	OK	108.129	216.552	1.00196	1.62013	0.0387	0.731636	no
ENSG00000082701	ENSG00000082701	GSK3B	chr3:119821322-120094417	Control	TC32	OK	24.7132	25.2168	0.0291023	0.0467722	0.9452	0.998796	no
ENSG00000082781	ENSG00000082781	ITGB5	chr3:124761947-124901418	Control	TC32	OK	21.6052	11.5932	-0.898105	-1.41637	0.11145	0.998796	no
ENSG00000082805	ENSG00000082805	ERC1	chr12:912076-1495933	Control	TC32	OK	19.9569	24.7326	0.309526	0.384012	0.50245	0.998796	no
ENSG00000082898	ENSG00000082898	XPO1	chr2:61471187-61538626	Control	TC32	OK	107.652	155.577	0.531247	0.670382	0.4142	0.998796	no
ENSG00000082996	ENSG00000082996	RNF13	chr3:149761099-150225190	Control	TC32	OK	81.0419	105.26	0.37722	0.735134	0.3729	0.998796	no
ENSG00000083093	ENSG00000083093	PALB2	chr16:23603159-23641310	Control	TC32	OK	8.70289	9.4931	0.125384	0.267021	0.72	0.998796	no
ENSG00000083097	ENSG00000083097	DOPEY1	chr6:83067665-83198932	Control	TC32	FAIL	7.19071	6.396	0	0	1	1	no
ENSG00000083099	ENSG00000083099	LYRM2	chr6:89433169-89638753	Control	TC32	OK	14.9854	17.0025	0.182197	0.416861	0.5922	0.998796	no
ENSG00000083123	ENSG00000083123	BCKDHB	chr6:80106646-80346270	Control	TC32	OK	3.54218	5.90049	0.736198	0.648693	0.36105	0.998796	no
ENSG00000083168	ENSG00000083168	KAT6A	chr8:41929478-42051990	Control	TC32	OK	29.6389	27.9667	-0.0837832	-0.101855	0.89525	0.998796	no
ENSG00000083223	ENSG00000083223	ZCCHC6	chr9:86287732-86354454	Control	TC32	OK	29.5304	34.3044	0.216193	0.355758	0.65615	0.998796	no
ENSG00000083290	ENSG00000083290	ULK2	chr17:19770828-19867936	Control	TC32	OK	7.81367	4.6753	-0.740943	-0.846733	0.2828	0.998796	no
ENSG00000083312	ENSG00000083312	TNPO1	chr5:72794404-72916733	Control	TC32	OK	28.6368	21.5419	-0.410728	-0.318388	0.5799	0.998796	no
ENSG00000083444	ENSG00000083444	PLOD1	chr1:11934204-11975538	Control	TC32	OK	36.1692	31.8415	-0.183853	-0.347042	0.59745	0.998796	no
ENSG00000083454	ENSG00000083454	P2RX5	chr17:3662895-3696404	Control	TC32	OK	4.12225	1.16395	-1.8244	-0.750377	0.2438	0.998796	no
ENSG00000083457	ENSG00000083457	ITGAE	chr17:3714627-3801243	Control	TC32	OK	71.3421	23.8315	-1.58188	-2.75418	0.0003	0.0334853	yes
ENSG00000083520	ENSG00000083520	DIS3	chr13:72727748-73016461	Control	TC32	OK	11.5319	12.5645	0.123723	0.221413	0.7708	0.998796	no
ENSG00000083535	ENSG00000083535	PIBF1	chr13:72727748-73016461	Control	TC32	OK	8.02138	9.34232	0.219931	0.17632	0.7989	0.998796	no
ENSG00000083544	ENSG00000083544	TDRD3	chr13:60396456-60573878	Control	TC32	OK	9.83012	7.28564	-0.432153	-0.894988	0.2788	0.998796	no
ENSG00000083642	ENSG00000083642	PDS5B	chr13:32586426-32778019	Control	TC32	OK	21.1878	16.217	-0.38573	-0.642506	0.4523	0.998796	no
ENSG00000083750	ENSG00000083750	RRAGB	chrX:55717738-55758774	Control	TC32	OK	11.5559	10.2412	-0.174241	-0.270792	0.74455	0.998796	no
ENSG00000083799	ENSG00000083799	CYLD	chr16:50693587-50803338	Control	TC32	OK	29.2524	32.0023	0.129621	0.248924	0.74025	0.998796	no
ENSG00000083807	ENSG00000083807	SLC27A5	chr19:58467044-58512413	Control	TC32	OK	3.59239	5.68344	0.661821	0.475217	0.62305	0.998796	no
ENSG00000083812	ENSG00000083812	ZNF324	chr19:58467044-58512413	Control	TC32	OK	6.29132	4.48779	-0.487358	-0.803107	0.3322	0.998796	no
ENSG00000083814	ENSG00000083814	ZNF671	chr19:57681968-57758159	Control	TC32	OK	5.90888	4.6627	-0.341721	-0.35914	0.67085	0.998796	no
ENSG00000083828	ENSG00000083828	ZNF586	chr19:57769654-57916610	Control	TC32	OK	14.229	11.8974	-0.258188	-0.192555	0.7811	0.998796	no
ENSG00000083838	ENSG00000083838	ZNF446	chr19:58467044-58512413	Control	TC32	OK	3.37536	2.6793	-0.333187	-0.327976	0.7183	0.998796	no
ENSG00000083844	ENSG00000083844	ZNF264	chr19:57191499-57222846	Control	TC32	OK	17.9348	15.0356	-0.25438	-0.447652	0.5599	0.998796	no
ENSG00000083845	ENSG00000083845	RPS5	chr19:58386399-58394806	Control	TC32	OK	71.1176	88.5449	0.316203	0.862104	0.30565	0.998796	no
ENSG00000083896	ENSG00000083896	YTHDC1	chr4:68310386-68350089	Control	TC32	OK	17.2548	14.4939	-0.251546	-0.286738	0.687	0.998796	no
ENSG00000083937	ENSG00000083937	CHMP2B	chr3:87227270-87255548	Control	TC32	OK	17.7285	16.4744	-0.105843	-0.211476	0.79685	0.998796	no
ENSG00000084070	ENSG00000084070	SMAP2	chr1:40344849-40423326	Control	TC32	OK	43.4329	42.9195	-0.0171527	-0.0360931	0.9586	0.998796	no
ENSG00000084072	ENSG00000084072	PPIE	chr1:39692181-39788861	Control	TC32	OK	19.0051	18.6995	-0.0233835	-0.0389784	0.9647	0.998796	no
ENSG00000084073	ENSG00000084073	ZMPSTE24	chr1:40258106-40294184	Control	TC32	OK	18.0619	21.7145	0.265712	0.718529	0.3684	0.998796	no
ENSG00000084090	ENSG00000084090	STARD7	chr2:96184858-96242621	Control	TC32	OK	135.419	154.079	0.186241	0.383679	0.59265	0.998796	no
ENSG00000084092	ENSG00000084092	NOA1	chr4:56907875-57205510	Control	TC32	OK	6.18788	3.68139	-0.749196	-0.607226	0.45635	0.998796	no
ENSG00000084093	ENSG00000084093	REST	chr4:56907875-57205510	Control	TC32	OK	29.7868	25.0391	-0.250488	-0.325808	0.65485	0.998796	no
ENSG00000084112	ENSG00000084112	SSH1	chr12:108778143-108857590	Control	TC32	OK	26.5754	50.7698	0.933876	1.29335	0.05365	0.814488	no
ENSG00000084207	ENSG00000084207	GSTP1	chr11:67583594-67586656	Control	TC32	OK	291.127	226.284	-0.363512	-0.646094	0.38365	0.998796	no
ENSG00000084234	ENSG00000084234	APLP2	chr11:130069836-130144811	Control	TC32	OK	720.528	542.28	-0.410018	-0.766982	0.358	0.998796	no
ENSG00000084444	ENSG00000084444	FAM234B	chr12:13044283-13142521	Control	TC32	OK	4.47153	3.71991	-0.265502	-0.408734	0.5365	0.998796	no
ENSG00000084463	ENSG00000084463	WBP11	chr12:14784578-14803540	Control	TC32	OK	21.982	21.2203	-0.0508802	-0.0742157	0.9235	0.998796	no
ENSG00000084623	ENSG00000084623	EIF3I	chr1:32209093-32231604	Control	TC32	OK	37.4437	45.9748	0.296118	0.705147	0.3933	0.998796	no
ENSG00000084652	ENSG00000084652	TXLNA	chr1:32179685-32198285	Control	TC32	OK	28	26.0371	-0.104861	-0.335176	0.69125	0.998796	no
ENSG00000084676	ENSG00000084676	NCOA1	chr2:24491913-24770702	Control	TC32	OK	30.8595	29.1934	-0.080072	-0.12496	0.8632	0.998796	no
ENSG00000084693	ENSG00000084693	AGBL5	chr2:27042363-27071773	Control	TC32	OK	9.37602	7.67231	-0.289313	-0.271416	0.68595	0.998796	no
ENSG00000084733	ENSG00000084733	RAB10	chr2:26034106-26137454	Control	TC32	OK	127.706	161.345	0.337324	0.624336	0.4474	0.998796	no
ENSG00000084754	ENSG00000084754	HADHA	chr2:26190634-26290468	Control	TC32	OK	70.8123	50.7741	-0.479906	-1.02967	0.20565	0.998796	no
ENSG00000084764	ENSG00000084764	MAPRE3	chr2:26847746-27027196	Control	TC32	OK	3.69749	6.01159	0.701202	1.10686	0.1692	0.998796	no
ENSG00000084774	ENSG00000084774	CAD	chr2:27217389-27243943	Control	TC32	OK	29.5654	25.4074	-0.218656	-0.344856	0.66615	0.998796	no
ENSG00000085063	ENSG00000085063	CD59	chr11:33698260-33736491	Control	TC32	OK	25.1884	37.5528	0.576164	1.2518	0.133	0.998796	no
ENSG00000085117	ENSG00000085117	CD82	chr11:44564426-44620363	Control	TC32	OK	63.9647	74.6388	0.222651	0.557173	0.51415	0.998796	no
ENSG00000085185	ENSG00000085185	BCORL1	chrX:129981106-130058083	Control	TC32	OK	10.7	7.03466	-0.605056	-0.809978	0.2301	0.998796	no
ENSG00000085224	ENSG00000085224	ATRX	chrX:77504877-77786269	Control	TC32	OK	40.1355	43.0107	0.0998185	0.132807	0.8762	0.998796	no
ENSG00000085231	ENSG00000085231	AK6	chr5:69350983-69414801	Control	TC32	OK	3.82778	4.20495	0.135581	0.0925011	0.9303	0.998796	no
ENSG00000085265	ENSG00000085265	FCN1	chr9:134905889-134917963	Control	TC32	OK	7.21122	32.7171	2.18173	4.95504	5e-05	0.00772968	yes
ENSG00000085274	ENSG00000085274	MYNN	chr3:169772830-169789716	Control	TC32	OK	3.57556	5.8604	0.712831	1.17441	0.14895	0.998796	no
ENSG00000085365	ENSG00000085365	SCAMP1	chr5:78360582-78479071	Control	TC32	OK	13.4934	9.936	-0.441521	-0.821897	0.31015	0.998796	no
ENSG00000085377	ENSG00000085377	PREP	chr6:105277564-105403084	Control	TC32	OK	17.8605	18.4698	0.0483944	0.115828	0.89285	0.998796	no
ENSG00000085415	ENSG00000085415	SEH1L	chr18:12947132-12991173	Control	TC32	OK	35.1298	39.4898	0.168785	0.252716	0.76325	0.998796	no
ENSG00000085433	ENSG00000085433	WDR47	chr1:108970213-109042113	Control	TC32	OK	6.34904	3.59831	-0.819218	-0.721397	0.29765	0.998796	no
ENSG00000085449	ENSG00000085449	WDFY1	chr2:223855715-223945387	Control	TC32	OK	67.8949	56.687	-0.260286	-0.296326	0.6434	0.998796	no
ENSG00000085491	ENSG00000085491	SLC25A24	chr1:108134035-108202743	Control	TC32	OK	10.9392	8.34535	-0.390466	-1.02677	0.2344	0.998796	no
ENSG00000085511	ENSG00000085511	MAP3K4	chr6:160990317-161117385	Control	TC32	OK	23.6732	30.79	0.379206	0.355902	0.58295	0.998796	no
ENSG00000085514	ENSG00000085514	PILRA	chr7:100307701-100400099	Control	TC32	OK	52.3567	83.7358	0.677469	1.53544	0.072	0.894832	no
ENSG00000085644	ENSG00000085644	ZNF213	chr16:3110459-3142805	Control	TC32	OK	6.37107	4.96809	-0.358843	-0.709935	0.35445	0.998796	no
ENSG00000085662	ENSG00000085662	AKR1B1	chr7:134442349-134459284	Control	TC32	OK	94.7988	201.44	1.08741	2.62676	0.00405	0.207224	no
ENSG00000085719	ENSG00000085719	CPNE3	chr8:86514426-86765023	Control	TC32	OK	16.8022	13.637	-0.301123	-0.38766	0.62455	0.998796	no
ENSG00000085721	ENSG00000085721	RRN3	chr16:14974590-15154564	Control	TC32	OK	5.74805	6.57665	0.194281	0.196117	0.76765	0.998796	no
ENSG00000085733	ENSG00000085733	CTTN	chr11:70270699-70436584	Control	TC32	OK	12.9579	58.7334	2.18035	2.24426	0.0045	0.220492	no
ENSG00000085760	ENSG00000085760	MTIF2	chr2:55236594-55269347	Control	TC32	OK	33.7231	48.5354	0.525298	0.997585	0.23465	0.998796	no
ENSG00000085788	ENSG00000085788	DDHD2	chr8:38225217-38382272	Control	TC32	OK	23.2468	24.9308	0.100899	0.085385	0.8936	0.998796	no
ENSG00000085832	ENSG00000085832	EPS15	chr1:51354262-51561629	Control	TC32	OK	38.9738	32.8724	-0.245627	-0.467141	0.56345	0.998796	no
ENSG00000085871	ENSG00000085871	MGST2	chr4:139665767-140154184	Control	TC32	OK	32.872	26.7007	-0.299985	-0.49015	0.57475	0.998796	no
ENSG00000085872	ENSG00000085872	CHERP	chr19:16479056-16660442	Control	TC32	OK	23.9786	24.3096	0.0197797	0.0199732	0.9776	0.998796	no
ENSG00000085978	ENSG00000085978	ATG16L1	chr2:233210050-233295674	Control	TC32	OK	7.54708	9.8615	0.38589	0.408032	0.64625	0.998796	no
ENSG00000085982	ENSG00000085982	USP40	chr2:233475519-233566782	Control	TC32	OK	17.026	15.066	-0.176443	-0.284045	0.71865	0.998796	no
ENSG00000085998	ENSG00000085998	POMGNT1	chr1:46188681-46221261	Control	TC32	OK	13.1107	11.9341	-0.135651	-0.233315	0.76045	0.998796	no
ENSG00000086015	ENSG00000086015	MAST2	chr1:45786986-46036124	Control	TC32	OK	20.4562	20.8272	0.0259327	0.0319856	0.9675	0.998796	no
ENSG00000086061	ENSG00000086061	DNAJA1	chr9:33025210-33039907	Control	TC32	OK	53.8461	43.8602	-0.295929	-0.7752	0.3037	0.998796	no
ENSG00000086062	ENSG00000086062	B4GALT1	chr9:33104081-33179983	Control	TC32	OK	40.5971	51.9971	0.357055	1.15644	0.1722	0.998796	no
ENSG00000086065	ENSG00000086065	CHMP5	chr9:33264878-33282069	Control	TC32	OK	9.16623	9.82509	0.100141	0.19933	0.8162	0.998796	no
ENSG00000086102	ENSG00000086102	NFX1	chr9:33290510-33371157	Control	TC32	OK	31.3637	33.6659	0.102193	0.191213	0.78665	0.998796	no
ENSG00000086189	ENSG00000086189	DIMT1	chr5:62306161-62628582	Control	TC32	OK	8.66277	9.05716	0.0642307	0.0701017	0.932	0.998796	no
ENSG00000086200	ENSG00000086200	IPO11	chr5:62306161-62628582	Control	TC32	OK	16.4096	20.7222	0.336631	0.371593	0.6561	0.998796	no
ENSG00000086232	ENSG00000086232	EIF2AK1	chr7:6009244-6059230	Control	TC32	OK	30.7686	28.7045	-0.100181	-0.163181	0.8387	0.998796	no
ENSG00000086289	ENSG00000086289	EPDR1	chr7:37683795-38025695	Control	TC32	OK	4.9989	5.53902	0.14802	0.224376	0.7905	0.998796	no
ENSG00000086300	ENSG00000086300	SNX10	chr7:26291894-26376701	Control	TC32	OK	16.9447	31.231	0.88215	1.6245	0.0551	0.824586	no
ENSG00000086475	ENSG00000086475	SEPHS1	chr10:13317423-13348298	Control	TC32	OK	7.8368	7.78095	-0.0103186	-0.0176101	0.98225	0.998796	no
ENSG00000086504	ENSG00000086504	MRPL28	chr16:367383-370527	Control	TC32	OK	21.8908	22.0696	0.0117368	0.0254373	0.97535	0.998796	no
ENSG00000086544	ENSG00000086544	ITPKC	chr19:40691528-40765389	Control	TC32	OK	3.76795	2.81583	-0.420219	-0.391834	0.6017	0.998796	no
ENSG00000086589	ENSG00000086589	RBM22	chr5:150690793-150701107	Control	TC32	OK	30.6408	25.1421	-0.285349	-0.615028	0.4723	0.998796	no
ENSG00000086598	ENSG00000086598	TMED2	chr12:123575890-123598577	Control	TC32	OK	92.5116	102.131	0.142715	0.26965	0.7487	0.998796	no
ENSG00000086619	ENSG00000086619	ERO1B	chr1:236142504-236281985	Control	TC32	OK	3.34277	1.93424	-0.789277	-0.750938	0.32215	0.998796	no
ENSG00000086666	ENSG00000086666	ZFAND6	chr15:80059567-80138393	Control	TC32	OK	32.0401	40.2707	0.329851	0.460853	0.55465	0.998796	no
ENSG00000086712	ENSG00000086712	TXLNG	chrX:16786426-16870414	Control	TC32	OK	3.56652	3.65721	0.0362267	0.0522728	0.9535	0.998796	no
ENSG00000086730	ENSG00000086730	LAT2	chr7:74199651-74229834	Control	TC32	OK	8.47532	15.6259	0.8826	1.67444	0.04275	0.755877	no
ENSG00000086758	ENSG00000086758	HUWE1	chrX:53532095-53686729	Control	TC32	OK	78.0315	83.821	0.103254	0.122694	0.8547	0.998796	no
ENSG00000086827	ENSG00000086827	ZW10	chr11:113733186-113773811	Control	TC32	OK	7.35161	6.69493	-0.134992	-0.275191	0.72975	0.998796	no
ENSG00000086848	ENSG00000086848	ALG9	chr11:111782194-111885975	Control	TC32	OK	15.223	14.6299	-0.0573379	-0.0750193	0.9274	0.998796	no
ENSG00000087008	ENSG00000087008	ACOX3	chr4:8366281-8512610	Control	TC32	OK	10.8443	16.0857	0.568845	0.741242	0.3737	0.998796	no
ENSG00000087053	ENSG00000087053	MTMR2	chr11:95832881-95925315	Control	TC32	OK	8.49005	13.8461	0.705636	1.33552	0.0439	0.767542	no
ENSG00000087074	ENSG00000087074	PPP1R15A	chr19:48872391-48876057	Control	TC32	OK	48.7462	84.5727	0.794904	2.52614	0.00365	0.193611	no
ENSG00000087076	ENSG00000087076	HSD17B14	chr19:48813016-48836678	Control	TC32	OK	28.2694	17.2288	-0.714421	-1.47562	0.0834	0.935951	no
ENSG00000087077	ENSG00000087077	TRIP6	chr7:100867137-100873454	Control	TC32	OK	25.4162	26.5052	0.0605309	0.122383	0.88715	0.998796	no
ENSG00000087086	ENSG00000087086	FTL	chr19:48965300-48966878	Control	TC32	OK	7628.38	7942.81	0.0582732	0.133133	0.8775	0.998796	no
ENSG00000087087	ENSG00000087087	SRRT	chr7:100875110-100888664	Control	TC32	OK	85.1556	97.3763	0.193468	0.332047	0.7056	0.998796	no
ENSG00000087088	ENSG00000087088	BAX	chr19:48954814-48961798	Control	TC32	OK	122.667	131.002	0.0948424	0.200857	0.80735	0.998796	no
ENSG00000087095	ENSG00000087095	NLK	chr17:28041736-28196381	Control	TC32	OK	13.1861	11.1025	-0.248132	-0.527993	0.5011	0.998796	no
ENSG00000087111	ENSG00000087111	PIGS	chr17:28455751-28645454	Control	TC32	OK	41.0583	31.36	-0.38875	-0.237765	0.65695	0.998796	no
ENSG00000087152	ENSG00000087152	ATXN7L3	chr17:44191804-44223710	Control	TC32	OK	49.0125	42.6758	-0.199733	-0.221913	0.73085	0.998796	no
ENSG00000087157	ENSG00000087157	PGS1	chr17:78378639-78577394	Control	TC32	OK	26.6874	27.0552	0.0197466	0.0441	0.9516	0.998796	no
ENSG00000087191	ENSG00000087191	PSMC5	chr17:63819432-63832026	Control	TC32	OK	68.6348	94.0688	0.454776	0.896797	0.29665	0.998796	no
ENSG00000087206	ENSG00000087206	UIMC1	chr5:176905004-177022633	Control	TC32	OK	14.6383	14.5727	-0.00647352	-0.0100806	0.98855	0.998796	no
ENSG00000087253	ENSG00000087253	LPCAT2	chr16:55508997-55586670	Control	TC32	OK	60.6881	53.2396	-0.188913	-0.273862	0.74825	0.998796	no
ENSG00000087263	ENSG00000087263	OGFOD1	chr16:56429132-56520283	Control	TC32	OK	18.6309	14.1655	-0.395311	-0.418119	0.5635	0.998796	no
ENSG00000087266	ENSG00000087266	SH3BP2	chr4:2793022-2841098	Control	TC32	OK	59.739	67.6017	0.178387	0.307499	0.6673	0.998796	no
ENSG00000087269	ENSG00000087269	NOP14	chr4:2934898-2963385	Control	TC32	OK	15.7073	14.5513	-0.110292	-0.274745	0.74875	0.998796	no
ENSG00000087274	ENSG00000087274	ADD1	chr4:2843856-2930076	Control	TC32	OK	106.549	89.4874	-0.251765	-0.441907	0.587	0.998796	no
ENSG00000087302	ENSG00000087302	RTRAF	chr14:51989474-52069228	Control	TC32	OK	46.5938	48.2199	0.0494891	0.109735	0.89695	0.998796	no
ENSG00000087338	ENSG00000087338	GMCL1	chr2:69829641-69881396	Control	TC32	OK	3.27954	2.07175	-0.662642	-1.01759	0.16605	0.998796	no
ENSG00000087365	ENSG00000087365	SF3B2	chr11:66050728-66069619	Control	TC32	OK	143.99	128.077	-0.168949	-0.37186	0.6302	0.998796	no
ENSG00000087448	ENSG00000087448	KLHL42	chr12:27779820-27803040	Control	TC32	OK	10.0862	8.82045	-0.193458	-0.262154	0.76255	0.998796	no
ENSG00000087460	ENSG00000087460	GNAS	chr20:58818918-58911192	Control	TC32	OK	419.685	315.61	-0.411167	-0.95007	0.2618	0.998796	no
ENSG00000087470	ENSG00000087470	DNM1L	chr12:32679199-32755902	Control	TC32	OK	43.8477	49.451	0.173497	0.248809	0.75915	0.998796	no
ENSG00000087502	ENSG00000087502	ERGIC2	chr12:29149102-29381189	Control	TC32	FAIL	24.9941	34.9347	0	0	1	1	no
ENSG00000087586	ENSG00000087586	AURKA	chr20:56369388-56392337	Control	TC32	OK	3.33331	3.40202	0.0294352	0.0467348	0.952	0.998796	no
ENSG00000087589	ENSG00000087589	CASS4	chr20:56412111-56460387	Control	TC32	OK	12.2547	38.6058	1.65548	4.80383	5e-05	0.00772968	yes
ENSG00000087842	ENSG00000087842	PIR	chrX:15384798-15556529	Control	TC32	OK	8.75615	13.2252	0.594925	1.11367	0.18855	0.998796	no
ENSG00000087884	ENSG00000087884	AAMDC	chr11:77821108-77994678	Control	TC32	OK	4.44268	2.48115	-0.840421	-0.454615	0.56	0.998796	no
ENSG00000087903	ENSG00000087903	RFX2	chr19:5978402-6205121	Control	TC32	OK	8.66097	6.2672	-0.466707	-0.63813	0.43105	0.998796	no
ENSG00000087995	ENSG00000087995	METTL2A	chr17:62423866-62450822	Control	TC32	OK	4.61756	5.65362	0.292046	0.557666	0.49415	0.998796	no
ENSG00000088035	ENSG00000088035	ALG6	chr1:63367589-63438562	Control	TC32	OK	3.97153	5.90447	0.572112	0.871908	0.317	0.998796	no
ENSG00000088038	ENSG00000088038	CNOT3	chr19:54137716-54159882	Control	TC32	OK	3.16325	1.98556	-0.671863	-0.596123	0.312	0.998796	no
ENSG00000088179	ENSG00000088179	PTPN4	chr2:119759630-119983818	Control	TC32	OK	5.46651	4.33248	-0.335426	-0.327407	0.75495	0.998796	no
ENSG00000088205	ENSG00000088205	DDX18	chr2:117814649-117832379	Control	TC32	OK	16.2936	18.7937	0.205945	0.399435	0.6095	0.998796	no
ENSG00000088247	ENSG00000088247	KHSRP	chr19:6413347-6424794	Control	TC32	OK	128.351	104.58	-0.295493	-0.672684	0.4151	0.998796	no
ENSG00000088256	ENSG00000088256	GNA11	chr19:3094409-3124004	Control	TC32	OK	10.2888	13.3313	0.373739	0.459674	0.46645	0.998796	no
ENSG00000088298	ENSG00000088298	EDEM2	chr20:35115356-35147364	Control	TC32	OK	18.7423	17.5008	-0.0988804	-0.270945	0.7546	0.998796	no
ENSG00000088356	ENSG00000088356	PDRG1	chr20:31847636-31952092	Control	TC32	OK	4.08977	4.47466	0.129758	0.263178	0.753	0.998796	no
ENSG00000088367	ENSG00000088367	EPB41L1	chr20:36091503-36232799	Control	TC32	OK	16.8721	5.49678	-1.61798	-2.41424	0.0014	0.102722	no
ENSG00000088448	ENSG00000088448	ANKRD10	chr13:110878539-110915069	Control	TC32	OK	44.7002	50.2977	0.170209	0.319172	0.7149	0.998796	no
ENSG00000088451	ENSG00000088451	TGDS	chr13:94574050-94596257	Control	TC32	OK	3.68553	3.96109	0.104024	0.176463	0.8256	0.998796	no
ENSG00000088538	ENSG00000088538	DOCK3	chr3:50675240-51384198	Control	TC32	OK	19.3965	9.21121	-1.07434	-3.31389	5e-05	0.00772968	yes
ENSG00000088543	ENSG00000088543	C3orf18	chr3:50558024-50596168	Control	TC32	OK	8.31541	9.44332	0.183507	0.148219	0.81595	0.998796	no
ENSG00000088682	ENSG00000088682	COQ9	chr16:57428168-57487327	Control	TC32	OK	35.118	37.639	0.100019	0.171092	0.84225	0.998796	no
ENSG00000088727	ENSG00000088727	KIF9	chr3:47164496-47346816	Control	TC32	OK	3.40903	2.11323	-0.689916	-0.351153	0.58675	0.998796	no
ENSG00000088766	ENSG00000088766	CRLS1	chr20:6006089-6040053	Control	TC32	OK	10.6021	14.2932	0.430986	0.730906	0.4091	0.998796	no
ENSG00000088812	ENSG00000088812	ATRN	chr20:3471039-3651122	Control	TC32	OK	11.5133	11.2263	-0.0364167	-0.0916519	0.91525	0.998796	no
ENSG00000088826	ENSG00000088826	SMOX	chr20:4120979-4187747	Control	TC32	OK	8.00305	4.97065	-0.687115	-0.615905	0.34105	0.998796	no
ENSG00000088832	ENSG00000088832	FKBP1A	chr20:1309908-1393172	Control	TC32	OK	209.86	212.462	0.0177745	0.0531052	0.948	0.998796	no
ENSG00000088833	ENSG00000088833	NSFL1C	chr20:1442161-1491587	Control	TC32	OK	24.553	21.6084	-0.184305	-0.305749	0.6879	0.998796	no
ENSG00000088854	ENSG00000088854	C20orf194	chr20:3249304-3407625	Control	TC32	OK	21.7496	18.5907	-0.226408	-0.588918	0.48825	0.998796	no
ENSG00000088876	ENSG00000088876	ZNF343	chr20:2461633-2524702	Control	TC32	OK	3.82105	4.3871	0.199298	0.172613	0.7858	0.998796	no
ENSG00000088888	ENSG00000088888	MAVS	chr20:3846798-3876123	Control	TC32	OK	17.5116	15.1025	-0.21352	-0.696588	0.4056	0.998796	no
ENSG00000088930	ENSG00000088930	XRN2	chr20:21302730-21389827	Control	TC32	OK	17.7559	18.2052	0.0360469	0.106015	0.89705	0.998796	no
ENSG00000088970	ENSG00000088970	KIZ	chr20:21125982-21246622	Control	TC32	OK	5.42431	3.72895	-0.540672	-0.194454	0.64765	0.998796	no
ENSG00000088986	ENSG00000088986	DYNLL1	chr12:120469849-120498493	Control	TC32	OK	110.911	140.664	0.342853	1.00076	0.2434	0.998796	no
ENSG00000089006	ENSG00000089006	SNX5	chr20:17941596-18059188	Control	TC32	OK	51.1503	37.8974	-0.432643	-0.68385	0.39555	0.998796	no
ENSG00000089009	ENSG00000089009	RPL6	chr12:112405189-112509913	Control	TC32	OK	193.89	195.152	0.00936253	0.0178019	0.98445	0.998796	no
ENSG00000089022	ENSG00000089022	MAPKAPK5	chr12:111839763-111902238	Control	TC32	OK	28.1578	28.7394	0.0294976	0.0470452	0.94945	0.998796	no
ENSG00000089041	ENSG00000089041	P2RX7	chr12:121132818-121188032	Control	TC32	OK	34.9555	89.3677	1.35423	3.16891	5e-05	0.00772968	yes
ENSG00000089048	ENSG00000089048	ESF1	chr20:13714321-13784886	Control	TC32	OK	7.29169	7.94981	0.124668	0.307304	0.71795	0.998796	no
ENSG00000089050	ENSG00000089050	RBBP9	chr20:18486539-18497243	Control	TC32	OK	3.66731	4.03551	0.138028	0.238396	0.7525	0.998796	no
ENSG00000089053	ENSG00000089053	ANAPC5	chr12:121308244-121399896	Control	TC32	OK	72.8257	65.9806	-0.142407	-0.233243	0.73555	0.998796	no
ENSG00000089057	ENSG00000089057	SLC23A2	chr20:4852355-5010293	Control	TC32	OK	22.54	22.9238	0.024361	0.0433097	0.954	0.998796	no
ENSG00000089060	ENSG00000089060	SLC8B1	chr12:113298758-113391625	Control	TC32	OK	72.0091	54.9409	-0.390297	-0.682658	0.41895	0.998796	no
ENSG00000089063	ENSG00000089063	TMEM230	chr20:5068231-5113103	Control	TC32	OK	32.6119	33.4275	0.0356353	0.103377	0.9057	0.998796	no
ENSG00000089094	ENSG00000089094	KDM2B	chr12:121400040-121593504	Control	TC32	OK	46.7355	48.184	0.0440345	0.0712894	0.91875	0.998796	no
ENSG00000089123	ENSG00000089123	TASP1	chr20:13389391-13638940	Control	TC32	OK	5.76387	5.01084	-0.201985	-0.301565	0.7313	0.998796	no
ENSG00000089127	ENSG00000089127	OAS1	chr12:112906776-113017751	Control	TC32	OK	63.1453	23.3434	-1.43566	-2.04663	0.00905	0.314077	no
ENSG00000089154	ENSG00000089154	GCN1	chr12:120127202-120194710	Control	TC32	OK	133.513	121.949	-0.130704	-0.154675	0.86185	0.998796	no
ENSG00000089157	ENSG00000089157	RPLP0	chr12:120196685-120201235	Control	TC32	OK	150.812	139.456	-0.11294	-0.31966	0.7022	0.998796	no
ENSG00000089159	ENSG00000089159	PXN	chr12:120201290-120265771	Control	TC32	OK	61.9993	82.089	0.404937	0.735645	0.31695	0.998796	no
ENSG00000089177	ENSG00000089177	KIF16B	chr20:16272103-16573434	Control	TC32	OK	10.2473	6.9681	-0.556402	-1.10845	0.111	0.998796	no
ENSG00000089195	ENSG00000089195	TRMT6	chr20:5937234-5950558	Control	TC32	OK	10.6847	9.64733	-0.147349	-0.374735	0.65495	0.998796	no
ENSG00000089220	ENSG00000089220	PEBP1	chr12:118063592-118145584	Control	TC32	OK	90.5959	58.6159	-0.628153	-1.52235	0.0743	0.8997	no
ENSG00000089234	ENSG00000089234	BRAP	chr12:111642145-111685986	Control	TC32	OK	9.09763	8.28468	-0.135046	-0.316537	0.7009	0.998796	no
ENSG00000089248	ENSG00000089248	ERP29	chr12:112013315-112023451	Control	TC32	OK	112.708	65.507	-0.782862	-2.21686	0.00495	0.233441	no
ENSG00000089280	ENSG00000089280	FUS	chr16:31180109-31194871	Control	TC32	OK	179.759	218.816	0.283657	0.588311	0.4831	0.998796	no
ENSG00000089289	ENSG00000089289	IGBP1	chrX:70133448-70166324	Control	TC32	OK	14.417	12.8531	-0.165661	-0.417662	0.6262	0.998796	no
ENSG00000089327	ENSG00000089327	FXYD5	chr19:35154729-35169883	Control	TC32	OK	181.158	132.221	-0.454305	-1.24603	0.14345	0.998796	no
ENSG00000089335	ENSG00000089335	ZNF302	chr19:34677638-34686397	Control	TC32	OK	8.57932	8.95946	0.0625493	0.0918552	0.89995	0.998796	no
ENSG00000089351	ENSG00000089351	GRAMD1A	chr19:34994783-35026471	Control	TC32	OK	34.6833	226.322	2.70607	6.40956	5e-05	0.00772968	yes
ENSG00000089486	ENSG00000089486	CDIP1	chr16:4510674-4538828	Control	TC32	OK	9.67128	7.63989	-0.340154	-0.607479	0.38355	0.998796	no
ENSG00000089505	ENSG00000089505	CMTM1	chr16:66552562-66579137	Control	TC32	OK	4.47102	1.81962	-1.29697	-0.838173	0.2708	0.998796	no
ENSG00000089597	ENSG00000089597	GANAB	chr11:62624825-62646726	Control	TC32	OK	136.528	158.908	0.218992	0.441193	0.59775	0.998796	no
ENSG00000089639	ENSG00000089639	GMIP	chr19:19629475-19643667	Control	TC32	OK	32.4819	28.9352	-0.16681	-0.384756	0.6128	0.998796	no
ENSG00000089682	ENSG00000089682	RBM41	chrX:107064419-107118823	Control	TC32	OK	8.88532	7.26723	-0.290018	-0.580928	0.48605	0.998796	no
ENSG00000089693	ENSG00000089693	MLF2	chr12:6747995-6770952	Control	TC32	OK	72.1399	94.9397	0.396215	0.868217	0.29715	0.998796	no
ENSG00000089737	ENSG00000089737	DDX24	chr14:94026328-94081245	Control	TC32	OK	43.4474	44.2193	0.0254052	0.051742	0.95255	0.998796	no
ENSG00000089775	ENSG00000089775	ZBTB25	chr14:64388030-64546173	Control	TC32	OK	7.65383	11.3924	0.57382	0.480601	0.50025	0.998796	no
ENSG00000089818	ENSG00000089818	NECAP1	chr12:8076938-8221115	Control	TC32	OK	18.0173	21.1856	0.233697	0.408268	0.6179	0.998796	no
ENSG00000089820	ENSG00000089820	ARHGAP4	chrX:153861513-153935223	Control	TC32	OK	86.1924	51.5526	-0.741515	-1.47939	0.0947	0.977395	no
ENSG00000089876	ENSG00000089876	DHX32	chr10:125823545-125896436	Control	TC32	OK	9.41095	9.03429	-0.0589303	-0.102466	0.8991	0.998796	no
ENSG00000089902	ENSG00000089902	RCOR1	chr14:102592660-102730576	Control	TC32	OK	44.7106	40.4972	-0.142794	-0.142666	0.86245	0.998796	no
ENSG00000089916	ENSG00000089916	GPATCH2L	chr14:76131706-76263474	Control	TC32	OK	36.5805	33.9459	-0.107838	-0.154768	0.8138	0.998796	no
ENSG00000090006	ENSG00000090006	LTBP4	chr19:40592882-40629818	Control	TC32	OK	5.00381	2.75889	-0.858939	-0.948271	0.2193	0.998796	no
ENSG00000090013	ENSG00000090013	BLVRB	chr19:40447764-40465840	Control	TC32	OK	137.712	80.5774	-0.773202	-2.25691	0.0079	0.295448	no
ENSG00000090020	ENSG00000090020	SLC9A1	chr1:27098814-27166981	Control	TC32	OK	27.6138	24.6791	-0.162097	-0.356039	0.65965	0.998796	no
ENSG00000090054	ENSG00000090054	SPTLC1	chr9:92000086-92115384	Control	TC32	OK	32.5941	33.3027	0.0310284	0.0526134	0.9476	0.998796	no
ENSG00000090060	ENSG00000090060	PAPOLA	chr14:96500809-96567111	Control	TC32	OK	140.963	164.294	0.220963	0.43936	0.59115	0.998796	no
ENSG00000090061	ENSG00000090061	CCNK	chr14:99481168-99604026	Control	TC32	OK	38.0588	41.064	0.109644	0.152971	0.8453	0.998796	no
ENSG00000090238	ENSG00000090238	YPEL3	chr16:30092313-30104116	Control	TC32	OK	17.192	17.5444	0.0292731	0.0618118	0.9408	0.998796	no
ENSG00000090263	ENSG00000090263	MRPS33	chr7:141002609-141015228	Control	TC32	OK	11.738	17.2769	0.557659	1.00784	0.2484	0.998796	no
ENSG00000090266	ENSG00000090266	NDUFB2	chr7:140518419-140924928	Control	TC32	OK	30.8143	38.9871	0.339393	0.444976	0.58295	0.998796	no
ENSG00000090273	ENSG00000090273	NUDC	chr1:26890487-26946862	Control	TC32	OK	13.5374	15.327	0.179129	0.31503	0.6976	0.998796	no
ENSG00000090316	ENSG00000090316	MAEA	chr4:1289850-1340147	Control	TC32	OK	31.8383	28.7226	-0.148575	-0.302776	0.7162	0.998796	no
ENSG00000090339	ENSG00000090339	ICAM1	chr19:10251900-10289019	Control	TC32	OK	67.7133	157.196	1.21505	2.65229	0.00095	0.0773621	no
ENSG00000090372	ENSG00000090372	STRN4	chr19:46719506-46789043	Control	TC32	OK	75.0666	72.867	-0.0429053	-0.0477421	0.95365	0.998796	no
ENSG00000090376	ENSG00000090376	IRAK3	chr12:66188878-66257434	Control	TC32	OK	15.1199	32.5051	1.10422	2.06255	0.00945	0.324454	no
ENSG00000090382	ENSG00000090382	LYZ	chr12:69348340-69354234	Control	TC32	OK	1731.27	1669.46	-0.052448	-0.125336	0.88495	0.998796	no
ENSG00000090432	ENSG00000090432	MUL1	chr1:20499447-20508161	Control	TC32	OK	18.5376	18.2977	-0.0187934	-0.0542975	0.94895	0.998796	no
ENSG00000090447	ENSG00000090447	TFAP4	chr16:4257185-4273075	Control	TC32	OK	8.04273	4.58083	-0.812075	-1.31232	0.0966	0.988185	no
ENSG00000090470	ENSG00000090470	PDCD7	chr15:65117378-65133836	Control	TC32	OK	9.17324	6.64857	-0.464387	-0.949224	0.17935	0.998796	no
ENSG00000090487	ENSG00000090487	SPG21	chr15:64963020-64990310	Control	TC32	OK	97.9184	101.146	0.0467873	0.131703	0.86535	0.998796	no
ENSG00000090520	ENSG00000090520	DNAJB11	chr3:186538440-186773476	Control	TC32	OK	26.551	30.0073	0.176547	0.335501	0.68785	0.998796	no
ENSG00000090565	ENSG00000090565	RAB11FIP3	chr16:425618-523011	Control	TC32	OK	2.30351	3.11892	0.437217	0.456521	0.54145	0.998796	no
ENSG00000090581	ENSG00000090581	GNPTG	chr16:1351922-1414751	Control	TC32	OK	72.9971	59.2922	-0.299996	-0.458265	0.56315	0.998796	no
ENSG00000090612	ENSG00000090612	ZNF268	chr12:133130574-133214831	Control	TC32	OK	10.8441	10.586	-0.0347501	-0.0511088	0.94605	0.998796	no
ENSG00000090615	ENSG00000090615	GOLGA3	chr12:132768908-132956306	Control	TC32	OK	38.696	32.5234	-0.250704	-0.161836	0.60545	0.998796	no
ENSG00000090621	ENSG00000090621	PABPC4	chr1:39560815-39576790	Control	TC32	OK	210.551	215.851	0.035864	0.0828234	0.921	0.998796	no
ENSG00000090659	ENSG00000090659	CD209	chr19:7739993-7747564	Control	TC32	OK	171.953	364.317	1.08318	2.51056	0.0033	0.18034	no
ENSG00000090661	ENSG00000090661	CERS4	chr19:8206735-8262421	Control	TC32	OK	3.28545	6.32736	0.945512	1.07572	0.1836	0.998796	no
ENSG00000090674	ENSG00000090674	MCOLN1	chr19:7522625-7561764	Control	TC32	OK	96.7787	60.1904	-0.685158	-0.807057	0.37845	0.998796	no
ENSG00000090686	ENSG00000090686	USP48	chr1:21678297-21783606	Control	TC32	OK	32.3817	28.9372	-0.162257	-0.303169	0.67115	0.998796	no
ENSG00000090776	ENSG00000090776	EFNB1	chrX:68828996-68842147	Control	TC32	OK	7.87905	4.14183	-0.927753	-2.27603	0.0093	0.320828	no
ENSG00000090857	ENSG00000090857	PDPR	chr16:70113625-70187361	Control	TC32	OK	41.7734	38.2501	-0.127122	-0.286356	0.70415	0.998796	no
ENSG00000090861	ENSG00000090861	AARS	chr16:70252294-70289543	Control	TC32	OK	112.576	137.956	0.293316	0.563042	0.4717	0.998796	no
ENSG00000090863	ENSG00000090863	GLG1	chr16:74447426-74607144	Control	TC32	OK	79.5121	70.0831	-0.182108	-0.303882	0.68365	0.998796	no
ENSG00000090905	ENSG00000090905	TNRC6A	chr16:24610208-24827632	Control	TC32	OK	42.3922	36.3429	-0.222126	-0.208849	0.72545	0.998796	no
ENSG00000090924	ENSG00000090924	PLEKHG2	chr19:39412584-39428415	Control	TC32	OK	3.88498	1.63444	-1.24911	-0.986396	0.1113	0.998796	no
ENSG00000090989	ENSG00000090989	EXOC1	chr4:55853615-55905034	Control	TC32	OK	20.6404	21.7075	0.0727229	0.138783	0.8614	0.998796	no
ENSG00000091009	ENSG00000091009	RBM27	chr5:146203549-146376963	Control	TC32	OK	6.65513	6.91197	0.0546293	0.0582878	0.92465	0.998796	no
ENSG00000091039	ENSG00000091039	OSBPL8	chr12:76351796-76559809	Control	TC32	OK	72.1049	72.5165	0.00821127	0.0125741	0.9884	0.998796	no
ENSG00000091073	ENSG00000091073	DTX2	chr7:76461675-76505995	Control	TC32	OK	30.9986	46.7419	0.592514	1.1081	0.19615	0.998796	no
ENSG00000091106	ENSG00000091106	NLRC4	chr2:32224452-32265854	Control	TC32	OK	29.9082	38.5978	0.367977	1.16596	0.17075	0.998796	no
ENSG00000091127	ENSG00000091127	PUS7	chr7:105439660-105522267	Control	TC32	OK	6.70571	10.4467	0.639583	0.54726	0.37535	0.998796	no
ENSG00000091136	ENSG00000091136	LAMB1	chr7:107890969-108003255	Control	TC32	OK	7.83768	5.58269	-0.489467	-0.295306	0.7562	0.998796	no
ENSG00000091140	ENSG00000091140	DLD	chr7:107890969-108003255	Control	TC32	OK	63.1952	90.4856	0.517874	1.06853	0.20205	0.998796	no
ENSG00000091157	ENSG00000091157	WDR7	chr18:56597207-57038845	Control	TC32	OK	68.2789	55.9418	-0.287513	-0.413141	0.61565	0.998796	no
ENSG00000091164	ENSG00000091164	TXNL1	chr18:56597207-57038845	Control	TC32	OK	18.419	28.1529	0.61209	0.80604	0.3137	0.998796	no
ENSG00000091317	ENSG00000091317	CMTM6	chr3:32391670-32503408	Control	TC32	OK	85.544	144.392	0.75525	1.67673	0.0475	0.789636	no
ENSG00000091409	ENSG00000091409	ITGA6	chr2:172427353-172608669	Control	TC32	OK	25.0522	12.6093	-0.990442	-1.20174	0.09945	0.998073	no
ENSG00000091436	ENSG00000091436	MAP3K20	chr2:173075434-173282036	Control	TC32	OK	14.692	13.5601	-0.115657	-0.255122	0.72	0.998796	no
ENSG00000091483	ENSG00000091483	FH	chr1:241497602-241519761	Control	TC32	OK	23.2647	27.5496	0.243891	0.4163	0.57595	0.998796	no
ENSG00000091490	ENSG00000091490	SEL1L3	chr4:25747426-25929874	Control	TC32	OK	69.2453	23.5253	-1.5575	-2.51704	0.0025	0.149015	no
ENSG00000091527	ENSG00000091527	CDV3	chr3:133573729-133590261	Control	TC32	OK	94.0534	85.8043	-0.132431	-0.253826	0.7119	0.998796	no
ENSG00000091542	ENSG00000091542	ALKBH5	chr17:18087885-18209954	Control	TC32	OK	38.167	32.3953	-0.23654	-0.621851	0.46085	0.998796	no
ENSG00000091592	ENSG00000091592	NLRP1	chr17:5499426-5619424	Control	TC32	OK	10.5859	9.55241	-0.148201	-0.323068	0.6619	0.998796	no
ENSG00000091640	ENSG00000091640	SPAG7	chr17:4959225-4967872	Control	TC32	OK	56.2438	58.6917	0.0614623	0.152063	0.86005	0.998796	no
ENSG00000091732	ENSG00000091732	ZC3HC1	chr7:129953233-130051451	Control	TC32	OK	8.24791	9.76793	0.244024	0.415405	0.6077	0.998796	no
ENSG00000091831	ENSG00000091831	ESR1	chr6:151656690-152637801	Control	TC32	OK	5.07333	3.04166	-0.738073	-0.265643	0.42735	0.998796	no
ENSG00000091947	ENSG00000091947	TMEM101	chr17:44011187-44023946	Control	TC32	OK	11.9612	12.942	0.113704	0.244351	0.7668	0.998796	no
ENSG00000092010	ENSG00000092010	PSME1	chr14:24136157-24141588	Control	TC32	OK	24.021	34.0016	0.501305	1.20392	0.1621	0.998796	no
ENSG00000092020	ENSG00000092020	PPP2R3C	chr14:35044906-35317493	Control	TC32	OK	30.8283	35.4072	0.199788	0.198302	0.84695	0.998796	no
ENSG00000092036	ENSG00000092036	HAUS4	chr14:22929608-22982642	Control	TC32	OK	42.8974	36.1541	-0.246731	-0.489593	0.58055	0.998796	no
ENSG00000092068	ENSG00000092068	SLC7A8	chr14:23125294-23183674	Control	TC32	OK	40.3222	30.6177	-0.397208	-0.624141	0.4735	0.998796	no
ENSG00000092094	ENSG00000092094	OSGEP	chr14:20446410-20455105	Control	TC32	OK	29.8023	29.9344	0.00638194	0.0122243	0.9885	0.998796	no
ENSG00000092098	ENSG00000092098	RNF31	chr14:24143361-24167402	Control	TC32	OK	17.6986	13.7147	-0.36791	-0.391019	0.60275	0.998796	no
ENSG00000092108	ENSG00000092108	SCFD1	chr14:30622111-30822702	Control	TC32	OK	51.027	52.8555	0.0507924	0.104375	0.90655	0.998796	no
ENSG00000092140	ENSG00000092140	G2E3	chr14:30437991-30620063	Control	TC32	OK	5.71176	8.12544	0.508509	0.422373	0.56105	0.998796	no
ENSG00000092148	ENSG00000092148	HECTD1	chr14:31100111-31207804	Control	TC32	FAIL	164.94	124.645	0	0	1	1	no
ENSG00000092199	ENSG00000092199	HNRNPC	chr14:21209135-21269494	Control	TC32	OK	152.543	208.561	0.451258	1.10106	0.18965	0.998796	no
ENSG00000092201	ENSG00000092201	SUPT16H	chr14:21351471-21384266	Control	TC32	OK	25.1866	25.0017	-0.0106306	-0.0240553	0.9752	0.998796	no
ENSG00000092203	ENSG00000092203	TOX4	chr14:21459019-21511375	Control	TC32	OK	20.4331	15.4536	-0.402963	-0.55563	0.3758	0.998796	no
ENSG00000092208	ENSG00000092208	GEMIN2	chr14:39114222-39136973	Control	TC32	OK	3.21651	3.97067	0.303885	0.385098	0.64735	0.998796	no
ENSG00000092330	ENSG00000092330	TINF2	chr14:24239642-24242674	Control	TC32	OK	29.7441	20.0435	-0.569467	-1.18322	0.1686	0.998796	no
ENSG00000092421	ENSG00000092421	SEMA6A	chr5:116443615-116591398	Control	TC32	OK	5.71958	5.9433	0.0553552	0.0662497	0.9306	0.998796	no
ENSG00000092439	ENSG00000092439	TRPM7	chr15:50552472-50686815	Control	TC32	OK	35.7698	33.1673	-0.108983	-0.179899	0.7942	0.998796	no
ENSG00000092529	ENSG00000092529	CAPN3	chr15:42208412-42412318	Control	TC32	OK	13.3826	10.7486	-0.316205	-0.257666	0.77875	0.998796	no
ENSG00000092531	ENSG00000092531	SNAP23	chr15:42491232-42548802	Control	TC32	OK	95.4748	83.2915	-0.196951	-0.38779	0.64835	0.998796	no
ENSG00000092621	ENSG00000092621	PHGDH	chr1:119648410-119744226	Control	TC32	OK	26.8786	20.7147	-0.375802	-0.740631	0.37645	0.998796	no
ENSG00000092820	ENSG00000092820	EZR	chr6:158765740-158820593	Control	TC32	OK	46.5399	45.662	-0.0274734	-0.0846557	0.916	0.998796	no
ENSG00000092841	ENSG00000092841	MYL6	chr12:56150795-56190284	Control	TC32	OK	563.515	481.318	-0.227463	-0.554828	0.5176	0.998796	no
ENSG00000092847	ENSG00000092847	AGO1	chr1:35869807-35930528	Control	TC32	OK	48.4191	30.0644	-0.687519	-1.5687	0.0664	0.888176	no
ENSG00000092871	ENSG00000092871	RFFL	chr17:34927858-35121522	Control	TC32	OK	18.7698	19.99	0.0908645	0.0890448	0.8602	0.998796	no
ENSG00000092929	ENSG00000092929	UNC13D	chr17:75827224-75844717	Control	TC32	OK	42.0462	37.478	-0.16593	-0.228224	0.7444	0.998796	no
ENSG00000092931	ENSG00000092931	MFSD11	chr17:76726829-76781449	Control	TC32	OK	27.4013	23.8436	-0.200641	-0.200979	0.78505	0.998796	no
ENSG00000092964	ENSG00000092964	DPYSL2	chr8:26379258-26658178	Control	TC32	OK	58.7507	79.676	0.439539	0.861226	0.2154	0.998796	no
ENSG00000092978	ENSG00000092978	GPATCH2	chr1:217426991-217631082	Control	TC32	OK	5.35917	6.04454	0.173623	0.288335	0.64525	0.998796	no
ENSG00000093000	ENSG00000093000	NUP50	chr22:45163840-45188015	Control	TC32	OK	38.341	28.6944	-0.418118	-0.826227	0.19745	0.998796	no
ENSG00000093010	ENSG00000093010	COMT	chr22:19875516-20016808	Control	TC32	OK	191.421	209.742	0.131863	0.268076	0.74775	0.998796	no
ENSG00000093072	ENSG00000093072	ADA2	chr22:17178789-17221989	Control	TC32	OK	231.223	108.351	-1.09357	-2.18989	0.00625	0.252701	no
ENSG00000093144	ENSG00000093144	ECHDC1	chr6:127288709-127343609	Control	TC32	OK	56.0784	53.1527	-0.0773018	-0.18902	0.8175	0.998796	no
ENSG00000093167	ENSG00000093167	LRRFIP2	chr3:37052655-37183689	Control	TC32	OK	19.7708	33.5963	0.764931	1.3403	0.06015	0.854905	no
ENSG00000093183	ENSG00000093183	SEC22C	chr3:42547968-42665854	Control	TC32	FAIL	19.8739	23.7619	0	0	1	1	no
ENSG00000093217	ENSG00000093217	XYLB	chr3:38346759-38421348	Control	TC32	OK	3.01161	3.21401	0.093837	0.0687883	0.9075	0.998796	no
ENSG00000094631	ENSG00000094631	HDAC6	chrX:48801376-48824982	Control	TC32	OK	59.7123	39.1615	-0.608594	-1.1617	0.17655	0.998796	no
ENSG00000094841	ENSG00000094841	UPRT	chrX:75274084-75304600	Control	TC32	OK	9.42578	6.60638	-0.512752	-0.99592	0.23045	0.998796	no
ENSG00000094880	ENSG00000094880	CDC23	chr5:138139765-138213343	Control	TC32	OK	19.6875	19.8461	0.0115704	0.015655	0.9848	0.998796	no
ENSG00000094914	ENSG00000094914	AAAS	chr12:53307455-53324864	Control	TC32	OK	34.1521	35.817	0.0686713	0.142701	0.8675	0.998796	no
ENSG00000094916	ENSG00000094916	CBX5	chr12:54230939-54351849	Control	TC32	OK	34.1552	36.3354	0.0892719	0.0973114	0.8889	0.998796	no
ENSG00000094975	ENSG00000094975	SUCO	chr1:172532348-172611833	Control	TC32	OK	14.8664	14.6608	-0.0200894	-0.0313993	0.9701	0.998796	no
ENSG00000095002	ENSG00000095002	MSH2	chr2:47402968-47663146	Control	TC32	OK	8.25903	4.91957	-0.747441	-1.11884	0.14955	0.998796	no
ENSG00000095015	ENSG00000095015	MAP3K1	chr5:56815573-56896152	Control	TC32	OK	20.8774	14.4343	-0.532443	-1.66555	0.04715	0.788351	no
ENSG00000095059	ENSG00000095059	DHPS	chr19:12643274-12681902	Control	TC32	FAIL	63.0059	77.8211	0	0	1	1	no
ENSG00000095066	ENSG00000095066	HOOK2	chr19:12763002-12874951	Control	TC32	OK	5.40818	8.29869	0.617739	0.264453	0.5409	0.998796	no
ENSG00000095139	ENSG00000095139	ARCN1	chr11:118436489-118603033	Control	TC32	OK	65.8535	65.5432	-0.0068148	-0.0152778	0.98625	0.998796	no
ENSG00000095209	ENSG00000095209	TMEM38B	chr9:105694543-105776612	Control	TC32	OK	30.4549	48.3287	0.666207	1.05013	0.1969	0.998796	no
ENSG00000095261	ENSG00000095261	PSMD5	chr9:120815495-120854385	Control	TC32	OK	27.7236	21.6475	-0.356914	-0.274073	0.6006	0.998796	no
ENSG00000095303	ENSG00000095303	PTGS1	chr9:122370529-122395703	Control	TC32	OK	92.0006	52.9848	-0.796065	-2.38573	0.00585	0.244037	no
ENSG00000095319	ENSG00000095319	NUP188	chr9:128920894-129028303	Control	TC32	OK	72.5279	93.0532	0.35952	0.496461	0.53035	0.998796	no
ENSG00000095321	ENSG00000095321	CRAT	chr9:129094809-129148946	Control	TC32	OK	8.08344	9.29855	0.202036	0.167414	0.7789	0.998796	no
ENSG00000095370	ENSG00000095370	SH2D3C	chr9:127738316-127778741	Control	TC32	OK	9.46056	6.9732	-0.440104	-0.902187	0.2314	0.998796	no
ENSG00000095380	ENSG00000095380	NANS	chr9:98056738-98119212	Control	TC32	OK	78.461	62.9468	-0.317843	-0.678599	0.43025	0.998796	no
ENSG00000095383	ENSG00000095383	TBC1D2	chr9:98198998-98255721	Control	TC32	OK	85.3861	53.7445	-0.667883	-2.12407	0.0121	0.379803	no
ENSG00000095485	ENSG00000095485	CWF19L1	chr10:100229666-100267680	Control	TC32	OK	10.6749	16.6305	0.639606	0.97877	0.23845	0.998796	no
ENSG00000095539	ENSG00000095539	SEMA4G	chr10:100969457-100994401	Control	TC32	OK	3.32543	1.94147	-0.776388	-0.392908	0.58315	0.998796	no
ENSG00000095564	ENSG00000095564	BTAF1	chr10:91923768-92030325	Control	TC32	OK	29.8042	28.7808	-0.0504104	-0.069993	0.9157	0.998796	no
ENSG00000095574	ENSG00000095574	IKZF5	chr10:122930902-123008817	Control	TC32	OK	11.3297	7.05538	-0.683314	-0.722376	0.35055	0.998796	no
ENSG00000095585	ENSG00000095585	BLNK	chr10:96129714-96271587	Control	TC32	OK	3.04227	3.95427	0.378264	0.205869	0.79265	0.998796	no
ENSG00000095787	ENSG00000095787	WAC	chr10:28522651-28623112	Control	TC32	FAIL	112.004	113.985	0	0	1	1	no
ENSG00000095794	ENSG00000095794	CREM	chr10:35098005-35212958	Control	TC32	OK	11.9987	10.6932	-0.166185	-0.29852	0.73285	0.998796	no
ENSG00000095906	ENSG00000095906	NUBP2	chr16:1773206-1794971	Control	TC32	OK	17.3372	13.653	-0.344658	-0.409713	0.63555	0.998796	no
ENSG00000095951	ENSG00000095951	HIVEP1	chr6:12007669-12164999	Control	TC32	OK	7.64076	13.9127	0.864616	1.90691	0.01995	0.519581	no
ENSG00000095970	ENSG00000095970	TREM2	chr6:41158505-41163186	Control	TC32	OK	222.918	53.4647	-2.05986	-6.27396	5e-05	0.00772968	yes
ENSG00000096060	ENSG00000096060	FKBP5	chr6:35573584-35728583	Control	TC32	OK	37.092	63.7774	0.781937	2.51475	0.0039	0.202415	no
ENSG00000096063	ENSG00000096063	SRPK1	chr6:35805292-35921342	Control	TC32	OK	15.6676	16.6996	0.0920303	0.15192	0.83835	0.998796	no
ENSG00000096070	ENSG00000096070	BRPF3	chr6:36146697-36232790	Control	TC32	OK	11.4471	12.3645	0.111226	0.155367	0.824	0.998796	no
ENSG00000096080	ENSG00000096080	MRPS18A	chr6:43645045-43687791	Control	TC32	OK	10.712	11.8753	0.148744	0.248876	0.7653	0.998796	no
ENSG00000096093	ENSG00000096093	EFHC1	chr6:52361420-52576915	Control	TC32	OK	3.74486	2.60996	-0.520884	-0.266229	0.55795	0.998796	no
ENSG00000096384	ENSG00000096384	HSP90AB1	chr6:44246165-44253888	Control	TC32	OK	125.048	149.081	0.253612	0.834048	0.33385	0.998796	no
ENSG00000096401	ENSG00000096401	CDC5L	chr6:44387524-44450426	Control	TC32	OK	8.1397	8.28074	0.0247841	0.0732295	0.9336	0.998796	no
ENSG00000096654	ENSG00000096654	ZNF184	chr6:27450742-27473118	Control	TC32	OK	3.71875	4.11992	0.147799	0.325528	0.70795	0.998796	no
ENSG00000096717	ENSG00000096717	SIRT1	chr10:67884668-67918390	Control	TC32	OK	8.79715	7.45113	-0.239578	-0.512505	0.4984	0.998796	no
ENSG00000096746	ENSG00000096746	HNRNPH3	chr10:68282659-68407294	Control	TC32	OK	94.7135	86.6287	-0.128724	-0.276887	0.7414	0.998796	no
ENSG00000096968	ENSG00000096968	JAK2	chr9:4984389-5128183	Control	TC32	OK	13.9116	18.7738	0.432433	0.590571	0.35655	0.998796	no
ENSG00000096996	ENSG00000096996	IL12RB1	chr19:18058994-18151692	Control	TC32	OK	4.99292	2.97854	-0.745279	-0.528865	0.4289	0.998796	no
ENSG00000097007	ENSG00000097007	ABL1	chr9:130713945-130887675	Control	TC32	OK	20.9682	20.3927	-0.0401496	-0.0574788	0.9427	0.998796	no
ENSG00000097021	ENSG00000097021	ACOT7	chr1:6264268-6394391	Control	TC32	OK	20.2247	28.2107	0.480127	1.14741	0.16765	0.998796	no
ENSG00000097033	ENSG00000097033	SH3GLB1	chr1:86704569-86748184	Control	TC32	OK	30.5678	38.5316	0.334031	0.724661	0.3747	0.998796	no
ENSG00000099139	ENSG00000099139	PCSK5	chr9:75890643-76362339	Control	TC32	OK	13.7442	9.75963	-0.493924	-1.08764	0.148	0.998796	no
ENSG00000099194	ENSG00000099194	SCD	chr10:100347123-100364834	Control	TC32	OK	77.0595	83.9013	0.122721	0.400212	0.63505	0.998796	no
ENSG00000099203	ENSG00000099203	TMED1	chr19:10718078-10836318	Control	TC32	OK	16.8153	19.9103	0.243744	0.210514	0.786	0.998796	no
ENSG00000099219	ENSG00000099219	ERMP1	chr9:5629024-5833117	Control	TC32	OK	17.2697	10.8151	-0.675193	-1.55377	0.05865	0.8448	no
ENSG00000099246	ENSG00000099246	RAB18	chr10:27504173-27542237	Control	TC32	OK	35.9643	36.3327	0.014704	0.0231532	0.97565	0.998796	no
ENSG00000099250	ENSG00000099250	NRP1	chr10:33177491-33336262	Control	TC32	OK	64.7741	133.586	1.04428	1.53367	0.0502	0.809195	no
ENSG00000099284	ENSG00000099284	H2AFY2	chr10:70052795-70132934	Control	TC32	OK	3.68723	2.61516	-0.495638	-0.534352	0.5241	0.998796	no
ENSG00000099290	ENSG00000099290	WASHC2A	chr10:50067887-50133506	Control	TC32	OK	75.2739	78.5787	0.0619892	0.0578296	0.94605	0.998796	no
ENSG00000099308	ENSG00000099308	MAST3	chr19:18058994-18151692	Control	TC32	OK	9.98654	8.23625	-0.277998	-0.398101	0.46595	0.998796	no
ENSG00000099326	ENSG00000099326	MZF1	chr19:58559128-58599801	Control	TC32	OK	17.7659	12.1425	-0.549043	-1.14084	0.17785	0.998796	no
ENSG00000099330	ENSG00000099330	OCEL1	chr19:17226203-17229219	Control	TC32	OK	13.3886	6.52637	-1.03665	-1.31539	0.1241	0.998796	no
ENSG00000099331	ENSG00000099331	MYO9B	chr19:17075780-17214537	Control	TC32	OK	383.865	239.006	-0.683555	-1.07137	0.18105	0.998796	no
ENSG00000099337	ENSG00000099337	KCNK6	chr19:38319843-38332076	Control	TC32	OK	28.4792	21.3582	-0.415118	-0.751114	0.2131	0.998796	no
ENSG00000099338	ENSG00000099338	CATSPERG	chr19:38335774-38370943	Control	TC32	OK	4.91258	7.6109	0.631586	0.892773	0.26885	0.998796	no
ENSG00000099341	ENSG00000099341	PSMD8	chr19:38374535-38383824	Control	TC32	OK	59.3051	65.6106	0.145773	0.375747	0.6459	0.998796	no
ENSG00000099364	ENSG00000099364	FBXL19	chr16:30919318-30956511	Control	TC32	OK	8.41755	5.52652	-0.607029	-0.924005	0.2911	0.998796	no
ENSG00000099365	ENSG00000099365	STX1B	chr16:30989255-31010661	Control	TC32	OK	3.35517	1.69471	-0.985353	-0.857888	0.30015	0.998796	no
ENSG00000099377	ENSG00000099377	HSD3B7	chr16:30957293-30989152	Control	TC32	OK	36.9351	30.9902	-0.253178	-0.522859	0.52665	0.998796	no
ENSG00000099381	ENSG00000099381	SETD1A	chr16:30957293-30989152	Control	TC32	OK	9.90293	11.5511	0.222105	0.289124	0.6477	0.998796	no
ENSG00000099385	ENSG00000099385	BCL7C	chr16:30833625-30895220	Control	TC32	OK	12.1611	8.94155	-0.443681	-1.00059	0.24335	0.998796	no
ENSG00000099622	ENSG00000099622	CIRBP	chr19:1259383-1274880	Control	TC32	OK	89.3972	90.2342	0.0134438	0.0305874	0.97065	0.998796	no
ENSG00000099624	ENSG00000099624	ATP5F1D	chr19:1241745-1244826	Control	TC32	OK	26.5685	22.7064	-0.226619	-0.426757	0.6067	0.998796	no
ENSG00000099725	ENSG00000099725	PRKY	chrY:7273971-7381548	Control	TC32	OK	16.6299	11.8988	-0.482959	-0.479286	0.5178	0.998796	no
ENSG00000099783	ENSG00000099783	HNRNPM	chr19:8444569-8489114	Control	TC32	OK	86.931	87.4167	0.00803826	0.0169523	0.9819	0.998796	no
ENSG00000099785	ENSG00000099785	MARCH2	chr19:8413269-8439017	Control	TC32	OK	34.9351	21.3818	-0.70829	-1.56017	0.0734	0.897598	no
ENSG00000099795	ENSG00000099795	NDUFB7	chr19:14566077-14572062	Control	TC32	OK	48.8021	43.1581	-0.177314	-0.428156	0.61985	0.998796	no
ENSG00000099797	ENSG00000099797	TECR	chr19:14514769-14565980	Control	TC32	OK	32.6926	31.4288	-0.0568744	-0.0821528	0.9271	0.998796	no
ENSG00000099800	ENSG00000099800	TIMM13	chr19:2389770-2456996	Control	TC32	OK	24.1583	25.9629	0.103935	0.142123	0.8644	0.998796	no
ENSG00000099804	ENSG00000099804	CDC34	chr19:531711-542092	Control	TC32	OK	35.6679	36.6693	0.0399446	0.0705274	0.9338	0.998796	no
ENSG00000099810	ENSG00000099810	MTAP	chr9:21802542-22121097	Control	TC32	OK	13.6921	14.1671	0.0492034	0.0572671	0.92275	0.998796	no
ENSG00000099817	ENSG00000099817	POLR2E	chr19:1065922-1095380	Control	TC32	OK	43.5228	49.5628	0.187486	0.288654	0.7003	0.998796	no
ENSG00000099821	ENSG00000099821	POLRMT	chr19:617223-633604	Control	TC32	OK	11.3064	8.59575	-0.395438	-0.696585	0.3893	0.998796	no
ENSG00000099860	ENSG00000099860	GADD45B	chr19:2476121-2478259	Control	TC32	OK	17.0601	13.82	-0.30387	-0.570592	0.49125	0.998796	no
ENSG00000099875	ENSG00000099875	MKNK2	chr19:2037464-2051244	Control	TC32	OK	23.6311	28.2258	0.25633	0.48063	0.526	0.998796	no
ENSG00000099889	ENSG00000099889	ARVCF	chr22:19875516-20016808	Control	TC32	OK	3.43162	2.24258	-0.61373	-0.274281	0.63985	0.998796	no
ENSG00000099899	ENSG00000099899	TRMT2A	chr22:20080231-20127357	Control	TC32	OK	58.0662	55.6715	-0.0607613	-0.102895	0.8989	0.998796	no
ENSG00000099901	ENSG00000099901	RANBP1	chr22:20080231-20127357	Control	TC32	OK	18.1568	27.0472	0.574971	0.431378	0.6043	0.998796	no
ENSG00000099904	ENSG00000099904	ZDHHC8	chr22:20129455-20148007	Control	TC32	OK	39.5558	19.2877	-1.03621	-1.79386	0.034	0.690243	no
ENSG00000099910	ENSG00000099910	KLHL22	chr22:20424814-20495883	Control	TC32	OK	14.1355	17.5999	0.316237	0.467274	0.57245	0.998796	no
ENSG00000099917	ENSG00000099917	MED15	chr22:20495912-20592218	Control	TC32	OK	40.5527	40.7439	0.00678626	0.0113733	0.98835	0.998796	no
ENSG00000099940	ENSG00000099940	SNAP29	chr22:20707690-20891218	Control	TC32	OK	22.2828	16.6072	-0.42412	-0.435151	0.5606	0.998796	no
ENSG00000099942	ENSG00000099942	CRKL	chr22:20917425-20953749	Control	TC32	OK	21.798	19.9357	-0.12884	-0.407095	0.63205	0.998796	no
ENSG00000099949	ENSG00000099949	LZTR1	chr22:20965107-20999038	Control	TC32	OK	31.8653	26.9782	-0.240192	-0.402119	0.6083	0.998796	no
ENSG00000099956	ENSG00000099956	SMARCB1	chr22:23786930-23839128	Control	TC32	OK	17.8162	18.2556	0.0351554	0.0887131	0.9151	0.998796	no
ENSG00000099968	ENSG00000099968	BCL2L13	chr22:17628854-17730855	Control	TC32	OK	69.4965	54.9256	-0.339462	-0.731626	0.30875	0.998796	no
ENSG00000099974	ENSG00000099974	DDTL	chr22:23966900-23983915	Control	TC32	OK	6.41846	6.67733	0.0570438	0.100873	0.90835	0.998796	no
ENSG00000099977	ENSG00000099977	DDT	chr22:23966900-23983915	Control	TC32	OK	11.04	15.552	0.494357	0.612013	0.43785	0.998796	no
ENSG00000099991	ENSG00000099991	CABIN1	chr22:24011191-24178628	Control	TC32	OK	57.44	34.3588	-0.741376	-1.15979	0.14195	0.998796	no
ENSG00000099992	ENSG00000099992	TBC1D10A	chr22:30285116-30327046	Control	TC32	OK	15.9923	8.81964	-0.858586	-1.47398	0.0787	0.916655	no
ENSG00000099995	ENSG00000099995	SF3A1	chr22:30331987-30429053	Control	TC32	OK	73.8706	71.9469	-0.0380678	-0.0609405	0.94195	0.998796	no
ENSG00000099998	ENSG00000099998	GGT5	chr22:24219653-24245142	Control	TC32	OK	1.36168	3.86602	1.50547	2.25496	0.0093	0.320828	no
ENSG00000099999	ENSG00000099999	RNF215	chr22:30331987-30429053	Control	TC32	OK	2.75335	2.48356	-0.148781	-0.0547558	0.90265	0.998796	no
ENSG00000100003	ENSG00000100003	SEC14L2	chr22:30331987-30429053	Control	TC32	OK	4.11808	4.53495	0.139113	0.0448579	0.8944	0.998796	no
ENSG00000100014	ENSG00000100014	SPECC1L	chr22:24270816-24528390	Control	TC32	OK	22.7963	16.0655	-0.504831	-0.877661	0.24615	0.998796	no
ENSG00000100023	ENSG00000100023	PPIL2	chr22:21652269-21735834	Control	TC32	OK	30.2634	31.2658	0.0470104	0.0730241	0.9335	0.998796	no
ENSG00000100028	ENSG00000100028	SNRPD3	chr22:24540422-24629005	Control	TC32	OK	41.9732	50.2896	0.260794	0.303317	0.7056	0.998796	no
ENSG00000100029	ENSG00000100029	PES1	chr22:30576624-30627278	Control	TC32	OK	25.5846	23.8351	-0.102185	-0.160702	0.84415	0.998796	no
ENSG00000100030	ENSG00000100030	MAPK1	chr22:21754499-21867680	Control	TC32	OK	90.8985	109.678	0.270941	0.390113	0.6412	0.998796	no
ENSG00000100034	ENSG00000100034	PPM1F	chr22:21919419-21982816	Control	TC32	OK	28.4179	20.9541	-0.439565	-0.530803	0.4559	0.998796	no
ENSG00000100038	ENSG00000100038	TOP3B	chr22:21919419-21982816	Control	TC32	OK	20.3459	19.4044	-0.0683547	-0.0530204	0.94645	0.998796	no
ENSG00000100055	ENSG00000100055	CYTH4	chr22:37282026-37315345	Control	TC32	OK	80.2973	46.0695	-0.80154	-1.72275	0.02285	0.564379	no
ENSG00000100056	ENSG00000100056	ESS2	chr22:19130278-19144684	Control	TC32	OK	6.83985	6.81104	-0.006089	-0.0124279	0.98765	0.998796	no
ENSG00000100058	ENSG00000100058	CRYBB2P1	chr22:25448104-25520854	Control	TC32	OK	15.3485	13.7096	-0.162913	-0.233652	0.784	0.998796	no
ENSG00000100060	ENSG00000100060	MFNG	chr22:37469062-37486401	Control	TC32	OK	52.7715	47.1474	-0.162582	-0.285116	0.73315	0.998796	no
ENSG00000100068	ENSG00000100068	LRP5L	chr22:25351417-25405377	Control	TC32	OK	5.20255	6.06999	0.222476	0.346172	0.6566	0.998796	no
ENSG00000100075	ENSG00000100075	SLC25A1	chr22:19175574-19178830	Control	TC32	OK	20.0604	16.9937	-0.239348	-0.63763	0.4495	0.998796	no
ENSG00000100077	ENSG00000100077	GRK3	chr22:25564848-25729294	Control	TC32	OK	34.3714	31.355	-0.132514	-0.361365	0.66965	0.998796	no
ENSG00000100079	ENSG00000100079	LGALS2	chr22:37570245-37582616	Control	TC32	OK	18.2393	37.3294	1.03326	2.25984	0.01145	0.372706	no
ENSG00000100083	ENSG00000100083	GGA1	chr22:37608474-37633564	Control	TC32	OK	114.568	101.964	-0.168144	-0.36001	0.6554	0.998796	no
ENSG00000100084	ENSG00000100084	HIRA	chr22:19330697-19479215	Control	TC32	OK	6.44042	6.37572	-0.0145663	-0.0198051	0.9792	0.998796	no
ENSG00000100092	ENSG00000100092	SH3BP1	chr22:37634653-37666934	Control	TC32	OK	72.5464	69.884	-0.0539415	-0.0791822	0.91795	0.998796	no
ENSG00000100097	ENSG00000100097	LGALS1	chr22:37675607-37679806	Control	TC32	OK	526.657	391.676	-0.427201	-1.17435	0.1617	0.998796	no
ENSG00000100099	ENSG00000100099	HPS4	chr22:26429272-26483837	Control	TC32	OK	31.1821	27.2766	-0.193057	-0.361434	0.66435	0.998796	no
ENSG00000100100	ENSG00000100100	PIK3IP1	chr22:31281592-31346232	Control	TC32	OK	9.25119	2.77773	-1.73573	-2.64584	0.00265	0.156345	no
ENSG00000100104	ENSG00000100104	SRRD	chr22:26483876-26512505	Control	TC32	OK	9.49849	10.1692	0.0984371	0.125492	0.84655	0.998796	no
ENSG00000100105	ENSG00000100105	PATZ1	chr22:31281592-31346232	Control	TC32	OK	8.74722	5.71505	-0.614059	-1.12164	0.17705	0.998796	no
ENSG00000100106	ENSG00000100106	TRIOBP	chr22:37681672-37776556	Control	TC32	OK	16.8244	10.3619	-0.699266	-0.905184	0.2311	0.998796	no
ENSG00000100109	ENSG00000100109	TFIP11	chr22:26483876-26512505	Control	TC32	OK	27.0874	25.3616	-0.0949768	-0.145415	0.8639	0.998796	no
ENSG00000100124	ENSG00000100124	ANKRD54	chr22:37830854-37895563	Control	TC32	OK	5.95174	6.00375	0.0125541	0.00938211	0.9896	0.998796	no
ENSG00000100129	ENSG00000100129	EIF3L	chr22:37830854-37895563	Control	TC32	OK	109.075	135.12	0.308927	0.56903	0.4719	0.998796	no
ENSG00000100138	ENSG00000100138	SNU13	chr22:41673929-41698136	Control	TC32	OK	26.3131	27.3492	0.0557179	0.121183	0.8858	0.998796	no
ENSG00000100139	ENSG00000100139	MICALL1	chr22:37905656-37942822	Control	TC32	OK	17.7569	31.5288	0.828291	1.61834	0.05555	0.824805	no
ENSG00000100142	ENSG00000100142	POLR2F	chr22:37943049-38041915	Control	TC32	OK	16.6747	19.6635	0.23786	0.342849	0.6908	0.998796	no
ENSG00000100147	ENSG00000100147	CCDC134	chr22:41800678-41826299	Control	TC32	OK	3.40736	2.91854	-0.223407	-0.280931	0.7455	0.998796	no
ENSG00000100150	ENSG00000100150	DEPDC5	chr22:31753866-31957603	Control	TC32	OK	44.8341	38.4265	-0.222494	-0.262196	0.74055	0.998796	no
ENSG00000100151	ENSG00000100151	PICK1	chr22:38056310-38075701	Control	TC32	OK	20.5377	20.1758	-0.0256466	-0.048711	0.95435	0.998796	no
ENSG00000100154	ENSG00000100154	TTC28	chr22:27851668-28679865	Control	TC32	OK	4.92195	3.26004	-0.594338	-0.337525	0.54515	0.998796	no
ENSG00000100167	ENSG00000100167	SEPT3	chr22:41969474-41998221	Control	TC32	OK	6.31038	3.77209	-0.742364	-1.37341	0.0644	0.880106	no
ENSG00000100181	ENSG00000100181	TPTEP1	chr22:16601886-16704477	Control	TC32	OK	14.6351	7.58648	-0.947932	-1.19834	0.07995	0.922346	no
ENSG00000100196	ENSG00000100196	KDELR3	chr22:38468061-38507660	Control	TC32	OK	3.75266	2.4729	-0.60171	-0.143042	0.7242	0.998796	no
ENSG00000100201	ENSG00000100201	DDX17	chr22:38468061-38507660	Control	TC32	OK	165.698	125.37	-0.402358	-0.957412	0.17115	0.998796	no
ENSG00000100209	ENSG00000100209	HSCB	chr22:28687742-28757515	Control	TC32	OK	4.80159	5.29204	0.140311	0.15234	0.8636	0.998796	no
ENSG00000100211	ENSG00000100211	CBY1	chr22:38656635-38681820	Control	TC32	OK	4.26545	2.08051	-1.03576	-1.26885	0.14625	0.998796	no
ENSG00000100216	ENSG00000100216	TOMM22	chr22:38681947-38685421	Control	TC32	OK	25.6568	33.1729	0.370662	0.926925	0.26955	0.998796	no
ENSG00000100219	ENSG00000100219	XBP1	chr22:28794554-28800597	Control	TC32	OK	66.869	70.1837	0.0697981	0.216843	0.7932	0.998796	no
ENSG00000100220	ENSG00000100220	RTCB	chr22:32387581-32412255	Control	TC32	OK	44.2644	45.259	0.0320574	0.0684583	0.9373	0.998796	no
ENSG00000100221	ENSG00000100221	JOSD1	chr22:38685542-38701556	Control	TC32	OK	24.6839	26.748	0.115861	0.215006	0.75975	0.998796	no
ENSG00000100225	ENSG00000100225	FBXO7	chr22:32474675-32498829	Control	TC32	OK	47.1247	43.0134	-0.131695	-0.341502	0.65305	0.998796	no
ENSG00000100226	ENSG00000100226	GTPBP1	chr22:38705722-38794198	Control	TC32	OK	23.2663	16.1834	-0.523726	-0.287771	0.5121	0.998796	no
ENSG00000100227	ENSG00000100227	POLDIP3	chr22:42583720-42614962	Control	TC32	OK	30.8024	32.335	0.070054	0.129684	0.87475	0.998796	no
ENSG00000100234	ENSG00000100234	TIMP3	chr22:32512551-33058372	Control	TC32	OK	31.114	4.31964	-2.84858	-7.97867	5e-05	0.00772968	yes
ENSG00000100239	ENSG00000100239	PPP6R2	chr22:50343303-50475024	Control	TC32	OK	30.0557	28.3202	-0.0858025	-0.12405	0.8699	0.998796	no
ENSG00000100241	ENSG00000100241	SBF1	chr22:50343303-50475024	Control	TC32	OK	20.8437	21.3895	0.0372919	0.0403257	0.94285	0.998796	no
ENSG00000100242	ENSG00000100242	SUN2	chr22:38705722-38794198	Control	TC32	OK	146.763	159.354	0.118745	0.194494	0.8197	0.998796	no
ENSG00000100243	ENSG00000100243	CYB5R3	chr22:42617839-42649568	Control	TC32	OK	38.0906	32.6098	-0.224132	-0.635565	0.46085	0.998796	no
ENSG00000100246	ENSG00000100246	DNAL4	chr22:38705722-38794198	Control	TC32	OK	4.16002	4.03477	-0.0441056	-0.0156485	0.98325	0.998796	no
ENSG00000100258	ENSG00000100258	LMF2	chr22:50502948-50507691	Control	TC32	OK	16.1274	13.0884	-0.301228	-0.655331	0.4278	0.998796	no
ENSG00000100263	ENSG00000100263	RHBDD3	chr22:29259851-29300525	Control	TC32	OK	7.74726	10.3692	0.420549	0.327497	0.78	0.998796	no
ENSG00000100266	ENSG00000100266	PACSIN2	chr22:42796501-43015145	Control	TC32	OK	48.1769	41.8479	-0.203187	-0.371719	0.61435	0.998796	no
ENSG00000100271	ENSG00000100271	TTLL1	chr22:43038584-43089428	Control	TC32	OK	3.48617	2.9284	-0.25153	-0.417208	0.63265	0.998796	no
ENSG00000100280	ENSG00000100280	AP1B1	chr22:29327679-29423193	Control	TC32	OK	104.085	75.4512	-0.464143	-0.936792	0.22055	0.998796	no
ENSG00000100281	ENSG00000100281	HMGXB4	chr22:35257451-35295807	Control	TC32	OK	18.6975	17.3208	-0.110335	-0.210323	0.78815	0.998796	no
ENSG00000100284	ENSG00000100284	TOM1	chr22:35298837-35347994	Control	TC32	OK	80.1649	72.1449	-0.152072	-0.298767	0.72355	0.998796	no
ENSG00000100288	ENSG00000100288	CHKB	chr22:50568860-50613981	Control	TC32	OK	35.6675	34.3035	-0.0562537	-0.101144	0.9079	0.998796	no
ENSG00000100292	ENSG00000100292	HMOX1	chr22:35380360-35394214	Control	TC32	OK	115.769	51.4547	-1.16987	-2.66834	0.0018	0.122727	no
ENSG00000100294	ENSG00000100294	MCAT	chr22:43132205-43143394	Control	TC32	OK	3.38291	3.79659	0.166438	0.248359	0.7563	0.998796	no
ENSG00000100296	ENSG00000100296	THOC5	chr22:29505878-29581337	Control	TC32	OK	28.3836	26.9373	-0.0754532	-0.109066	0.89985	0.998796	no
ENSG00000100297	ENSG00000100297	MCM5	chr22:35400062-35425430	Control	TC32	OK	22.9949	18.2355	-0.33456	-0.61906	0.4466	0.998796	no
ENSG00000100299	ENSG00000100299	ARSA	chr22:50622753-50628173	Control	TC32	OK	33.2512	21.2662	-0.644839	-1.7029	0.03965	0.738082	no
ENSG00000100300	ENSG00000100300	TSPO	chr22:43151513-43163242	Control	TC32	OK	159.063	143.853	-0.145007	-0.424073	0.6238	0.998796	no
ENSG00000100304	ENSG00000100304	TTLL12	chr22:43166621-43187133	Control	TC32	OK	21.0255	19.9777	-0.0737552	-0.134904	0.86865	0.998796	no
ENSG00000100307	ENSG00000100307	CBX7	chr22:39120166-39152674	Control	TC32	OK	9.72441	7.81645	-0.315097	-0.440038	0.47105	0.998796	no
ENSG00000100311	ENSG00000100311	PDGFB	chr22:39223358-39279897	Control	TC32	OK	3.31448	3.22438	-0.0397609	-0.0841033	0.9178	0.998796	no
ENSG00000100316	ENSG00000100316	RPL3	chr22:39312881-39320389	Control	TC32	OK	280.663	231.951	-0.275023	-0.740385	0.38295	0.998796	no
ENSG00000100319	ENSG00000100319	ZMAT5	chr22:29720083-29767011	Control	TC32	OK	6.42967	6.89997	0.101845	0.171089	0.84255	0.998796	no
ENSG00000100321	ENSG00000100321	SYNGR1	chr22:39349924-39385588	Control	TC32	OK	7.69385	3.2676	-1.23547	-1.83326	0.03155	0.663813	no
ENSG00000100324	ENSG00000100324	TAB1	chr22:39399740-39437060	Control	TC32	OK	13.4165	10.249	-0.388516	-0.666766	0.21895	0.998796	no
ENSG00000100325	ENSG00000100325	ASCC2	chr22:29788607-29838304	Control	TC32	OK	59.2726	60.6499	0.0331392	0.0640404	0.9404	0.998796	no
ENSG00000100330	ENSG00000100330	MTMR3	chr22:29883154-30177075	Control	TC32	OK	24.7534	21.7532	-0.186402	-0.204232	0.7063	0.998796	no
ENSG00000100335	ENSG00000100335	MIEF1	chr22:39499431-39518132	Control	TC32	OK	42.4018	38.153	-0.15233	-0.264005	0.72995	0.998796	no
ENSG00000100336	ENSG00000100336	APOL4	chr22:36189123-36204840	Control	TC32	OK	16.8798	5.4471	-1.63174	-3.0977	0.00035	0.0376139	yes
ENSG00000100342	ENSG00000100342	APOL1	chr22:36253009-36267530	Control	TC32	OK	15.2385	19.8149	0.378861	0.700676	0.37295	0.998796	no
ENSG00000100344	ENSG00000100344	PNPLA3	chr22:43923738-44172949	Control	TC32	OK	6.85837	0.8386	-3.03181	-0.853768	0.05635	0.831134	no
ENSG00000100345	ENSG00000100345	MYH9	chr22:36281276-36388067	Control	TC32	OK	725.032	481.34	-0.590987	-0.765409	0.36585	0.998796	no
ENSG00000100347	ENSG00000100347	SAMM50	chr22:43923738-44172949	Control	TC32	OK	14.8911	10.1355	-0.555033	-0.622236	0.41865	0.998796	no
ENSG00000100348	ENSG00000100348	TXN2	chr22:36467035-36482030	Control	TC32	OK	44.0865	40.5381	-0.121058	-0.310463	0.7157	0.998796	no
ENSG00000100350	ENSG00000100350	FOXRED2	chr22:36487189-36507101	Control	TC32	OK	4.64101	4.71659	0.0233044	0.03366	0.9611	0.998796	no
ENSG00000100353	ENSG00000100353	EIF3D	chr22:36510849-36529436	Control	TC32	OK	135.938	147.93	0.121963	0.292881	0.72065	0.998796	no
ENSG00000100354	ENSG00000100354	TNRC6B	chr22:40044816-40335808	Control	TC32	OK	29.2015	23.2764	-0.32717	-0.34894	0.51625	0.998796	no
ENSG00000100359	ENSG00000100359	SGSM3	chr22:40346499-40636702	Control	TC32	OK	29.1778	19.9041	-0.551803	-0.560814	0.3655	0.998796	no
ENSG00000100360	ENSG00000100360	IFT27	chr22:36758201-36776256	Control	TC32	OK	8.07213	15.727	0.962226	1.42991	0.1071	0.998796	no
ENSG00000100364	ENSG00000100364	KIAA0930	chr22:45190337-45240769	Control	TC32	OK	907.401	362.792	-1.3226	-2.80183	0.0006	0.0547174	no
ENSG00000100365	ENSG00000100365	NCF4	chr22:36847371-36878015	Control	TC32	OK	12.0584	7.41604	-0.701313	-1.56575	0.06835	0.894832	no
ENSG00000100368	ENSG00000100368	CSF2RB	chr22:36913627-36940449	Control	TC32	OK	14.5299	23.5207	0.694909	2.12705	0.01175	0.377004	no
ENSG00000100372	ENSG00000100372	SLC25A17	chr22:40769629-40819399	Control	TC32	OK	6.64284	7.85004	0.240901	0.414516	0.60435	0.998796	no
ENSG00000100376	ENSG00000100376	FAM118A	chr22:45308967-45341955	Control	TC32	OK	54.2155	36.2336	-0.581378	-1.28107	0.1384	0.998796	no
ENSG00000100379	ENSG00000100379	KCTD17	chr22:37051735-37063390	Control	TC32	OK	12.1016	12.8149	0.0826226	0.139048	0.8675	0.998796	no
ENSG00000100380	ENSG00000100380	ST13	chr22:40824534-40857022	Control	TC32	OK	24.5824	24.3886	-0.0114186	-0.0240703	0.97075	0.998796	no
ENSG00000100387	ENSG00000100387	RBX1	chr22:40951346-40973309	Control	TC32	OK	13.7878	14.8591	0.107946	0.203688	0.80615	0.998796	no
ENSG00000100393	ENSG00000100393	EP300	chr22:41091785-41197456	Control	TC32	OK	113.252	103.705	-0.12705	-0.153621	0.85605	0.998796	no
ENSG00000100395	ENSG00000100395	L3MBTL2	chr22:41205204-41240934	Control	TC32	OK	19.6099	14.8944	-0.396806	-0.647145	0.42465	0.998796	no
ENSG00000100401	ENSG00000100401	RANGAP1	chr22:41245610-41286251	Control	TC32	OK	14.0214	12.2574	-0.193978	-0.417938	0.56705	0.998796	no
ENSG00000100403	ENSG00000100403	ZC3H7B	chr22:41301521-41360147	Control	TC32	OK	15.2576	14.4653	-0.0769317	-0.237658	0.7739	0.998796	no
ENSG00000100410	ENSG00000100410	PHF5A	chr22:41459716-41468725	Control	TC32	OK	14.3006	16.3647	0.19451	0.408293	0.61685	0.998796	no
ENSG00000100412	ENSG00000100412	ACO2	chr22:41469124-41544606	Control	TC32	OK	47.7007	42.5527	-0.164759	-0.302542	0.70075	0.998796	no
ENSG00000100413	ENSG00000100413	POLR3H	chr22:41469124-41544606	Control	TC32	OK	19.0866	15.7486	-0.277338	-0.392863	0.5453	0.998796	no
ENSG00000100416	ENSG00000100416	TRMU	chr22:46330874-46357340	Control	TC32	OK	18.8057	18.1932	-0.0477718	-0.0916888	0.90765	0.998796	no
ENSG00000100417	ENSG00000100417	PMM1	chr22:41560762-41589890	Control	TC32	OK	3.20158	5.35959	0.74334	1.24613	0.1331	0.998796	no
ENSG00000100418	ENSG00000100418	DESI1	chr22:41598027-41621096	Control	TC32	OK	42.2464	58.5459	0.470739	0.779177	0.3463	0.998796	no
ENSG00000100422	ENSG00000100422	CERK	chr22:46684410-46738261	Control	TC32	OK	30.1876	21.0951	-0.517053	-0.95121	0.11885	0.998796	no
ENSG00000100425	ENSG00000100425	BRD1	chr22:49773282-49827512	Control	TC32	OK	15.2068	20.021	0.396796	0.578057	0.3846	0.998796	no
ENSG00000100426	ENSG00000100426	ZBED4	chr22:49853841-49890078	Control	TC32	OK	9.77848	9.23985	-0.0817409	-0.249864	0.76995	0.998796	no
ENSG00000100429	ENSG00000100429	HDAC10	chr22:50245182-50261825	Control	TC32	OK	30.978	22.5272	-0.459572	-0.916491	0.28345	0.998796	no
ENSG00000100439	ENSG00000100439	ABHD4	chr14:22595807-22613215	Control	TC32	OK	22.031	30.2262	0.456263	0.853476	0.2873	0.998796	no
ENSG00000100441	ENSG00000100441	KHNYN	chr14:24426531-24442905	Control	TC32	OK	42.2106	38.136	-0.146451	-0.24341	0.7611	0.998796	no
ENSG00000100442	ENSG00000100442	FKBP3	chr14:45084098-45135319	Control	TC32	OK	14.9173	15.0416	0.0119652	0.0157633	0.9861	0.998796	no
ENSG00000100445	ENSG00000100445	SDR39U1	chr14:24426531-24442905	Control	TC32	OK	26.0383	19.878	-0.389466	-0.40093	0.6337	0.998796	no
ENSG00000100461	ENSG00000100461	RBM23	chr14:22893205-22929585	Control	TC32	OK	52.9162	48.7141	-0.119371	-0.195346	0.78775	0.998796	no
ENSG00000100462	ENSG00000100462	PRMT5	chr14:22893205-22929585	Control	TC32	OK	57.9783	37.4024	-0.632383	-0.817517	0.38025	0.998796	no
ENSG00000100478	ENSG00000100478	AP4S1	chr14:30874513-31096450	Control	TC32	OK	4.26941	7.00879	0.715128	0.897079	0.2252	0.998796	no
ENSG00000100483	ENSG00000100483	VCPKMT	chr14:50108631-50116600	Control	TC32	OK	3.23929	2.97837	-0.121151	-0.216961	0.8008	0.998796	no
ENSG00000100485	ENSG00000100485	SOS2	chr14:50117119-50231558	Control	TC32	OK	15.0518	15.4879	0.0412048	0.0952815	0.89335	0.998796	no
ENSG00000100503	ENSG00000100503	NIN	chr14:50719762-50831121	Control	TC32	OK	62.7665	42.9781	-0.546393	-0.865572	0.17325	0.998796	no
ENSG00000100504	ENSG00000100504	PYGL	chr14:50848121-50944736	Control	TC32	OK	105.653	64.8236	-0.704736	-1.56863	0.04845	0.796724	no
ENSG00000100519	ENSG00000100519	PSMC6	chr14:52707171-52728587	Control	TC32	OK	15.1085	16.9336	0.164528	0.308821	0.719	0.998796	no
ENSG00000100522	ENSG00000100522	GNPNAT1	chr14:52775193-52791668	Control	TC32	OK	6.11549	6.31247	0.0457375	0.100074	0.8965	0.998796	no
ENSG00000100523	ENSG00000100523	DDHD1	chr14:53036744-53153282	Control	TC32	OK	26.3246	15.4734	-0.766622	-1.08085	0.0997	0.998796	no
ENSG00000100528	ENSG00000100528	CNIH1	chr14:54423559-54441431	Control	TC32	OK	36.4534	37.9356	0.0574972	0.129193	0.88305	0.998796	no
ENSG00000100532	ENSG00000100532	CGRRF1	chr14:54509811-54539309	Control	TC32	OK	8.78106	11.4831	0.38705	0.555196	0.5082	0.998796	no
ENSG00000100554	ENSG00000100554	ATP6V1D	chr14:67241108-67386516	Control	TC32	OK	71.5401	64.2191	-0.15575	-0.234254	0.78235	0.998796	no
ENSG00000100564	ENSG00000100564	PIGH	chr14:67447083-67600287	Control	TC32	OK	6.59854	6.98885	0.0829093	0.119844	0.8845	0.998796	no
ENSG00000100567	ENSG00000100567	PSMA3	chr14:57999734-58298139	Control	TC32	OK	33.5952	43.474	0.371895	0.332576	0.72615	0.998796	no
ENSG00000100568	ENSG00000100568	VTI1B	chr14:67619797-67695814	Control	TC32	OK	53.5575	43.6343	-0.295624	-0.332147	0.68215	0.998796	no
ENSG00000100575	ENSG00000100575	TIMM9	chr14:58395915-58551289	Control	TC32	OK	7.10127	8.81549	0.311962	0.316322	0.70775	0.998796	no
ENSG00000100577	ENSG00000100577	GSTZ1	chr14:77274955-77331597	Control	TC32	OK	15.283	14.5576	-0.0701548	-0.108493	0.90315	0.998796	no
ENSG00000100578	ENSG00000100578	KIAA0586	chr14:58395915-58551289	Control	TC32	OK	6.61491	7.36058	0.154098	0.199333	0.7691	0.998796	no
ENSG00000100580	ENSG00000100580	TMED8	chr14:77335020-77391497	Control	TC32	OK	10.0913	11.2951	0.162587	0.500504	0.56005	0.998796	no
ENSG00000100591	ENSG00000100591	AHSA1	chr14:77426674-77469474	Control	TC32	OK	75.7294	96.0357	0.342718	0.777815	0.3805	0.998796	no
ENSG00000100592	ENSG00000100592	DAAM1	chr14:59188645-59371405	Control	TC32	OK	4.29366	3.68651	-0.219952	-0.234789	0.72565	0.998796	no
ENSG00000100596	ENSG00000100596	SPTLC2	chr14:77505996-77616773	Control	TC32	OK	39.1507	21.5411	-0.861945	-1.0753	0.1803	0.998796	no
ENSG00000100599	ENSG00000100599	RIN3	chr14:92513773-92688994	Control	TC32	OK	45.3032	25.3653	-0.836758	-1.83722	0.0051	0.237035	no
ENSG00000100601	ENSG00000100601	ALKBH1	chr14:77672403-77708020	Control	TC32	OK	7.0086	5.80658	-0.271436	-0.42777	0.57605	0.998796	no
ENSG00000100603	ENSG00000100603	SNW1	chr14:77708070-77769742	Control	TC32	OK	21.2907	18.8	-0.179488	-0.355902	0.66455	0.998796	no
ENSG00000100605	ENSG00000100605	ITPK1	chr14:92936913-93116320	Control	TC32	OK	35.4911	17.7518	-0.999493	-2.20926	0.00525	0.240908	no
ENSG00000100612	ENSG00000100612	DHRS7	chr14:60091910-60169856	Control	TC32	OK	28.1526	24.7989	-0.182992	-0.258472	0.75475	0.998796	no
ENSG00000100614	ENSG00000100614	PPM1A	chr14:60240120-60299087	Control	TC32	OK	51.0792	45.1347	-0.1785	-0.354164	0.67375	0.998796	no
ENSG00000100629	ENSG00000100629	CEP128	chr14:80476982-81170414	Control	TC32	OK	6.67131	3.04902	-1.12962	-1.30749	0.09805	0.994222	no
ENSG00000100632	ENSG00000100632	ERH	chr14:69380122-69462388	Control	TC32	OK	44.1903	53.7188	0.281697	0.181223	0.68305	0.998796	no
ENSG00000100644	ENSG00000100644	HIF1A	chr14:61681040-61796428	Control	TC32	OK	86.2789	155.22	0.847231	1.3295	0.12835	0.998796	no
ENSG00000100647	ENSG00000100647	SUSD6	chr14:69611595-69715142	Control	TC32	OK	46.9976	95.6697	1.02547	1.56941	0.0363	0.711938	no
ENSG00000100650	ENSG00000100650	SRSF5	chr14:69726899-69772005	Control	TC32	OK	273.341	274.933	0.00837703	0.0213218	0.98115	0.998796	no
ENSG00000100664	ENSG00000100664	EIF5	chr14:103333543-103345025	Control	TC32	OK	202.974	216.344	0.0920291	0.174404	0.83565	0.998796	no
ENSG00000100697	ENSG00000100697	DICER1	chr14:95086227-95179933	Control	TC32	OK	102.567	100.064	-0.0356427	-0.0467604	0.943	0.998796	no
ENSG00000100711	ENSG00000100711	ZFYVE21	chr14:103715729-103733668	Control	TC32	OK	20.7942	14.2402	-0.546208	-1.09368	0.17085	0.998796	no
ENSG00000100714	ENSG00000100714	MTHFD1	chr14:64388030-64546173	Control	TC32	OK	28.9956	26.3115	-0.140139	-0.115289	0.89075	0.998796	no
ENSG00000100722	ENSG00000100722	ZC3H14	chr14:88562908-88792752	Control	TC32	OK	49.1003	35.4368	-0.470486	-0.886703	0.29665	0.998796	no
ENSG00000100726	ENSG00000100726	TELO2	chr16:1493343-1612110	Control	TC32	OK	9.62691	9.88469	0.0381231	0.0523698	0.9471	0.998796	no
ENSG00000100731	ENSG00000100731	PCNX1	chr14:70907404-71115382	Control	TC32	OK	18.6824	28.4734	0.607931	0.78916	0.21305	0.998796	no
ENSG00000100744	ENSG00000100744	GSKIP	chr14:96279201-96387288	Control	TC32	OK	14.4874	13.4985	-0.102	-0.0879363	0.91535	0.998796	no
ENSG00000100749	ENSG00000100749	VRK1	chr14:96797303-96945394	Control	TC32	OK	8.90472	7.26326	-0.293953	-0.458411	0.5769	0.998796	no
ENSG00000100764	ENSG00000100764	PSMC1	chr14:90256494-90332137	Control	TC32	OK	8.29248	9.09306	0.132964	0.158836	0.82575	0.998796	no
ENSG00000100767	ENSG00000100767	PAPLN	chr14:73237496-73274640	Control	TC32	OK	10.0495	26.7187	1.41072	2.31657	0.0013	0.0981245	no
ENSG00000100784	ENSG00000100784	RPS6KA5	chr14:90847861-91225632	Control	TC32	OK	2.53039	3.98444	0.655021	0.511714	0.47835	0.998796	no
ENSG00000100796	ENSG00000100796	PPP4R3A	chr14:91457610-91510554	Control	TC32	OK	62.2292	61.3814	-0.0197894	-0.0386151	0.96275	0.998796	no
ENSG00000100802	ENSG00000100802	C14orf93	chr14:22982697-23010166	Control	TC32	OK	4.1739	3.40266	-0.294735	-0.412658	0.57765	0.998796	no
ENSG00000100804	ENSG00000100804	PSMB5	chr14:23016542-23035230	Control	TC32	OK	47.0533	52.4255	0.155974	0.355072	0.6789	0.998796	no
ENSG00000100811	ENSG00000100811	YY1	chr14:100207406-100306547	Control	TC32	OK	56.7932	46.3506	-0.293129	-0.432465	0.5947	0.998796	no
ENSG00000100813	ENSG00000100813	ACIN1	chr14:23058563-23104992	Control	TC32	OK	156.412	136.533	-0.196097	-0.339124	0.67365	0.998796	no
ENSG00000100814	ENSG00000100814	CCNB1IP1	chr14:20311367-20333312	Control	TC32	OK	5.78531	7.31194	0.337861	0.567716	0.48585	0.998796	no
ENSG00000100815	ENSG00000100815	TRIP11	chr14:91965990-92040896	Control	TC32	OK	18.3502	21.6798	0.240551	0.370097	0.6427	0.998796	no
ENSG00000100823	ENSG00000100823	APEX1	chr14:20455190-20461612	Control	TC32	OK	116.248	106.156	-0.131012	-0.294549	0.7083	0.998796	no
ENSG00000100836	ENSG00000100836	PABPN1	chr14:23185315-23326185	Control	TC32	OK	66.8202	57.2139	-0.223917	-0.32736	0.63355	0.998796	no
ENSG00000100852	ENSG00000100852	ARHGAP5	chr14:32074945-32159728	Control	TC32	FAIL	9.28746	12.6335	0	0	1	1	no
ENSG00000100865	ENSG00000100865	CINP	chr14:102317376-102362916	Control	TC32	OK	15.9975	19.9368	0.317583	0.52857	0.53085	0.998796	no
ENSG00000100883	ENSG00000100883	SRP54	chr14:34920857-35029567	Control	TC32	OK	29.3426	31.7442	0.113497	0.197879	0.80375	0.998796	no
ENSG00000100888	ENSG00000100888	CHD8	chr14:21385193-21456126	Control	TC32	OK	61.3813	47.5866	-0.367244	-0.695014	0.35865	0.998796	no
ENSG00000100889	ENSG00000100889	PCK2	chr14:24080106-24132849	Control	TC32	OK	44.0661	39.0752	-0.173417	-0.342955	0.669	0.998796	no
ENSG00000100890	ENSG00000100890	KIAA0391	chr14:35044906-35317493	Control	TC32	OK	20.3438	19.9072	-0.0312994	-0.0376346	0.96035	0.998796	no
ENSG00000100897	ENSG00000100897	DCAF11	chr14:24080106-24132849	Control	TC32	OK	23.8155	23.8824	0.00405173	0.00475843	0.9943	0.998826	no
ENSG00000100902	ENSG00000100902	PSMA6	chr14:35044906-35317493	Control	TC32	OK	62.7002	75.8952	0.275538	0.363335	0.675	0.998796	no
ENSG00000100906	ENSG00000100906	NFKBIA	chr14:35401510-35404749	Control	TC32	OK	110.806	336.264	1.60156	3.48766	5e-05	0.00772968	yes
ENSG00000100908	ENSG00000100908	EMC9	chr14:24136157-24141588	Control	TC32	OK	3.02754	3.79757	0.326934	0.205825	0.84075	0.998796	no
ENSG00000100911	ENSG00000100911	PSME2	chr14:24143361-24167402	Control	TC32	OK	20.0862	40.9165	1.02648	0.514991	0.48815	0.998796	no
ENSG00000100918	ENSG00000100918	REC8	chr14:24171852-24239242	Control	TC32	OK	4.62137	2.00917	-1.20172	-0.469834	0.18715	0.998796	no
ENSG00000100926	ENSG00000100926	TM9SF1	chr14:24171852-24239242	Control	TC32	OK	16.0703	14.373	-0.161036	-0.211545	0.80715	0.998796	no
ENSG00000100934	ENSG00000100934	SEC23A	chr14:39031918-39109646	Control	TC32	OK	56.1912	66.5235	0.243521	0.268963	0.7511	0.998796	no
ENSG00000100938	ENSG00000100938	GMPR2	chr14:24171852-24239242	Control	TC32	OK	29.1477	25.1443	-0.21315	-0.174953	0.7867	0.998796	no
ENSG00000100941	ENSG00000100941	PNN	chr14:39174884-39183218	Control	TC32	OK	72.4077	59.9318	-0.27282	-0.528593	0.527	0.998796	no
ENSG00000100949	ENSG00000100949	RABGGTA	chr14:24265537-24271739	Control	TC32	OK	17.833	17.4055	-0.0350045	-0.0649928	0.9407	0.998796	no
ENSG00000100979	ENSG00000100979	PLTP	chr20:45888624-45912155	Control	TC32	OK	8.67197	4.816	-0.848526	-0.487246	0.57385	0.998796	no
ENSG00000100982	ENSG00000100982	PCIF1	chr20:45934627-45948023	Control	TC32	OK	17.0813	15.499	-0.140239	-0.3024	0.7152	0.998796	no
ENSG00000100983	ENSG00000100983	GSS	chr20:34928432-34956027	Control	TC32	OK	29.1661	31.6672	0.118697	0.267862	0.75075	0.998796	no
ENSG00000100985	ENSG00000100985	MMP9	chr20:46008907-46060152	Control	TC32	OK	10.5375	206.178	4.29028	11.4607	5e-05	0.00772968	yes
ENSG00000100991	ENSG00000100991	TRPC4AP	chr20:34975402-35092871	Control	TC32	OK	19.9906	17.1111	-0.224388	-0.662648	0.4379	0.998796	no
ENSG00000100994	ENSG00000100994	PYGB	chr20:25248068-25390983	Control	TC32	OK	29.9893	26.6763	-0.168891	-0.337293	0.64735	0.998796	no
ENSG00000100997	ENSG00000100997	ABHD12	chr20:25248068-25390983	Control	TC32	OK	64.8821	42.9086	-0.596552	-0.89561	0.24425	0.998796	no
ENSG00000101017	ENSG00000101017	CD40	chr20:46118271-46129863	Control	TC32	OK	56.9067	107.335	0.915443	2.54511	0.0032	0.17722	no
ENSG00000101019	ENSG00000101019	UQCC1	chr20:35302565-35412141	Control	TC32	OK	30.8274	31.3145	0.022617	0.0392498	0.96035	0.998796	no
ENSG00000101040	ENSG00000101040	ZMYND8	chr20:47209213-47356889	Control	TC32	OK	15.4465	11.4207	-0.435633	-0.842704	0.1735	0.998796	no
ENSG00000101052	ENSG00000101052	IFT52	chr20:43590930-43647296	Control	TC32	OK	14.5026	14.5176	0.00148833	0.00153924	0.99865	0.999411	no
ENSG00000101079	ENSG00000101079	NDRG3	chr20:36651765-36746078	Control	TC32	OK	8.76062	8.10293	-0.11259	-0.288606	0.73195	0.998796	no
ENSG00000101084	ENSG00000101084	C20orf24	chr20:36573487-36646216	Control	TC32	OK	159.754	191.381	0.260603	0.550017	0.51225	0.998796	no
ENSG00000101104	ENSG00000101104	PABPC1L	chr20:44910061-44960486	Control	TC32	OK	13.3511	15.2886	0.195497	0.367464	0.6354	0.998796	no
ENSG00000101109	ENSG00000101109	STK4	chr20:44966473-45079959	Control	TC32	OK	38.1915	34.8262	-0.133078	-0.287029	0.7003	0.998796	no
ENSG00000101126	ENSG00000101126	ADNP	chr20:50888915-50958555	Control	TC32	OK	23.3475	19.2996	-0.274695	-0.782701	0.3579	0.998796	no
ENSG00000101132	ENSG00000101132	PFDN4	chr20:54207846-54228052	Control	TC32	OK	4.15538	4.9355	0.248216	0.351825	0.68105	0.998796	no
ENSG00000101138	ENSG00000101138	CSTF1	chr20:56392370-56406369	Control	TC32	OK	11.2438	14.0032	0.316631	0.631655	0.4297	0.998796	no
ENSG00000101146	ENSG00000101146	RAE1	chr20:57351009-57379211	Control	TC32	OK	9.53538	11.9862	0.330016	0.42525	0.5867	0.998796	no
ENSG00000101150	ENSG00000101150	TPD52L2	chr20:63865227-63891545	Control	TC32	OK	40.9444	37.0448	-0.144394	-0.433778	0.6077	0.998796	no
ENSG00000101152	ENSG00000101152	DNAJC5	chr20:63895181-63936031	Control	TC32	OK	35.714	34.2114	-0.0620111	-0.201131	0.81055	0.998796	no
ENSG00000101158	ENSG00000101158	NELFCD	chr20:58981207-58995133	Control	TC32	OK	51.8571	56.0523	0.11223	0.257905	0.7548	0.998796	no
ENSG00000101160	ENSG00000101160	CTSZ	chr20:58995184-59007247	Control	TC32	OK	815.539	969.521	0.249518	0.731437	0.37825	0.998796	no
ENSG00000101161	ENSG00000101161	PRPF6	chr20:63981134-64033100	Control	TC32	OK	25.5735	22.2303	-0.202121	-0.618334	0.46945	0.998796	no
ENSG00000101166	ENSG00000101166	PRELID3B	chr20:59033144-59042909	Control	TC32	OK	16.8804	19.8579	0.234365	0.421744	0.6071	0.998796	no
ENSG00000101181	ENSG00000101181	MTG2	chr20:62183028-62203568	Control	TC32	OK	22.2164	28.1889	0.343504	0.679913	0.42015	0.998796	no
ENSG00000101182	ENSG00000101182	PSMA7	chr20:62136734-62143440	Control	TC32	OK	208.052	182.195	-0.191459	-0.590495	0.4895	0.998796	no
ENSG00000101187	ENSG00000101187	SLCO4A1	chr20:62640718-62685785	Control	TC32	OK	2.26899	13.3058	2.55194	3.0172	0.0021	0.135209	no
ENSG00000101189	ENSG00000101189	MRGBP	chr20:62796452-62814000	Control	TC32	OK	5.61069	6.3238	0.172614	0.198593	0.81345	0.998796	no
ENSG00000101190	ENSG00000101190	TCFL5	chr20:62816243-62861763	Control	TC32	OK	2.56452	2.95392	0.203943	0.364414	0.664	0.998796	no
ENSG00000101191	ENSG00000101191	DIDO1	chr20:62877737-62937952	Control	TC32	OK	24.7352	22.2958	-0.149798	-0.400561	0.6367	0.998796	no
ENSG00000101193	ENSG00000101193	GID8	chr20:62938118-62948475	Control	TC32	OK	30.8725	24.8871	-0.310927	-0.31327	0.54605	0.998796	no
ENSG00000101194	ENSG00000101194	SLC17A9	chr20:62952646-62969585	Control	TC32	OK	30.9317	25.4638	-0.280639	-0.527861	0.51915	0.998796	no
ENSG00000101199	ENSG00000101199	ARFGAP1	chr20:63272784-63289793	Control	TC32	OK	56.7976	42.4879	-0.418778	-0.992961	0.22625	0.998796	no
ENSG00000101216	ENSG00000101216	GMEB2	chr20:63587601-63627041	Control	TC32	OK	4.52804	4.97241	0.135057	0.332742	0.6994	0.998796	no
ENSG00000101220	ENSG00000101220	C20orf27	chr20:3753507-3768387	Control	TC32	OK	18.8819	12.1505	-0.635984	-1.43345	0.09895	0.997749	no
ENSG00000101224	ENSG00000101224	CDC25B	chr20:3786771-3806121	Control	TC32	OK	12.0727	11.9569	-0.0139153	-0.0246238	0.9701	0.998796	no
ENSG00000101236	ENSG00000101236	RNF24	chr20:3888238-4015582	Control	TC32	OK	29.5077	19.154	-0.623446	-1.71106	0.0436	0.76529	no
ENSG00000101246	ENSG00000101246	ARFRP1	chr20:63657809-63743505	Control	TC32	OK	21.6744	20.3679	-0.0896898	-0.106042	0.9016	0.998796	no
ENSG00000101247	ENSG00000101247	NDUFAF5	chr20:13784949-13821582	Control	TC32	OK	14.8782	14.9167	0.00373351	0.00548203	0.99565	0.998967	no
ENSG00000101255	ENSG00000101255	TRIB3	chr20:362834-397559	Control	TC32	OK	18.3698	47.4547	1.36921	3.93097	5e-05	0.00772968	yes
ENSG00000101265	ENSG00000101265	RASSF2	chr20:4780022-4823645	Control	TC32	OK	22.2782	19.9949	-0.156	-0.493878	0.56805	0.998796	no
ENSG00000101266	ENSG00000101266	CSNK2A1	chr20:472497-543835	Control	TC32	OK	33.7645	38.6957	0.196665	0.481122	0.5591	0.998796	no
ENSG00000101278	ENSG00000101278	RPS10P5	chr20:833714-857463	Control	TC32	OK	2.67849	4.55138	0.764883	0.580924	0.4869	0.998796	no
ENSG00000101290	ENSG00000101290	CDS2	chr20:5126785-5197887	Control	TC32	OK	41.865	51.4109	0.296328	0.544105	0.5065	0.998796	no
ENSG00000101294	ENSG00000101294	HM13	chr20:31514427-31577923	Control	TC32	OK	298.895	252.818	-0.241536	-0.626481	0.4628	0.998796	no
ENSG00000101307	ENSG00000101307	SIRPB1	chr20:1516758-1620061	Control	TC32	OK	53.1598	30.7768	-0.788492	-1.55524	0.065	0.883933	no
ENSG00000101310	ENSG00000101310	SEC23B	chr20:18507481-18561415	Control	TC32	OK	55.7811	56.3436	0.0144754	0.031748	0.96825	0.998796	no
ENSG00000101335	ENSG00000101335	MYL9	chr20:36306335-36573391	Control	TC32	OK	7.5667	8.60066	0.184784	0.167072	0.84795	0.998796	no
ENSG00000101336	ENSG00000101336	HCK	chr20:32052187-32101856	Control	TC32	OK	101.382	132.623	0.387533	1.20818	0.15335	0.998796	no
ENSG00000101337	ENSG00000101337	TM9SF4	chr20:32109505-32167258	Control	TC32	OK	31.6405	32.13	0.0221495	0.0411186	0.95705	0.998796	no
ENSG00000101342	ENSG00000101342	TLDC2	chr20:36876120-36951901	Control	TC32	OK	24.6579	18.296	-0.430525	-0.233898	0.78675	0.998796	no
ENSG00000101343	ENSG00000101343	CRNKL1	chr20:20034367-20360702	Control	TC32	OK	19.9823	18.6752	-0.0975984	-0.180852	0.83205	0.998796	no
ENSG00000101346	ENSG00000101346	POFUT1	chr20:32207879-32238667	Control	TC32	OK	14.4901	13.2435	-0.129778	-0.252869	0.75245	0.998796	no
ENSG00000101347	ENSG00000101347	SAMHD1	chr20:36876120-36951901	Control	TC32	OK	200.814	166.721	-0.268425	-0.530453	0.3503	0.998796	no
ENSG00000101350	ENSG00000101350	KIF3B	chr20:32277663-32335011	Control	TC32	OK	6.84754	5.92677	-0.208341	-0.593265	0.48615	0.998796	no
ENSG00000101361	ENSG00000101361	NOP56	chr20:2652144-2658393	Control	TC32	OK	88.0574	87.5355	-0.00857525	-0.0221721	0.9799	0.998796	no
ENSG00000101363	ENSG00000101363	MANBAL	chr20:37289637-37317260	Control	TC32	OK	10.6715	12.2642	0.200688	0.458654	0.5867	0.998796	no
ENSG00000101365	ENSG00000101365	IDH3B	chr20:2658394-2664219	Control	TC32	OK	61.9679	70.1122	0.178145	0.410002	0.63325	0.998796	no
ENSG00000101367	ENSG00000101367	MAPRE1	chr20:32819892-32854257	Control	TC32	OK	40.4515	39.4558	-0.0359536	-0.112851	0.8886	0.998796	no
ENSG00000101384	ENSG00000101384	JAG1	chr20:10637683-10994924	Control	TC32	OK	25.2491	25.1546	-0.00540839	-0.00834807	0.99135	0.998821	no
ENSG00000101391	ENSG00000101391	CDK5RAP1	chr20:33358838-33401561	Control	TC32	OK	17.9404	15.1752	-0.241496	-0.503483	0.5459	0.998796	no
ENSG00000101407	ENSG00000101407	TTI1	chr20:37983006-38033468	Control	TC32	OK	9.93541	10.2601	0.0463917	0.0875437	0.87915	0.998796	no
ENSG00000101413	ENSG00000101413	RPRD1B	chr20:38033545-38166578	Control	TC32	HIDATA	0	24.1459	0	0	1	1	no
ENSG00000101417	ENSG00000101417	PXMP4	chr20:33702753-33720319	Control	TC32	OK	4.20731	2.73446	-0.621643	-0.777865	0.36885	0.998796	no
ENSG00000101421	ENSG00000101421	CHMP4B	chr20:33811303-33854366	Control	TC32	OK	36.8207	33.9162	-0.118543	-0.349227	0.6805	0.998796	no
ENSG00000101425	ENSG00000101425	BPI	chr20:38210487-38337505	Control	TC32	OK	5.03804	2.55334	-0.98048	-1.5792	0.05775	0.839247	no
ENSG00000101439	ENSG00000101439	CST3	chr20:23626705-23638473	Control	TC32	OK	133.261	73.4651	-0.859121	-2.55723	0.0033	0.18034	no
ENSG00000101444	ENSG00000101444	AHCY	chr20:34194568-34311802	Control	TC32	OK	32.4079	30.5032	-0.087389	-0.141085	0.8592	0.998796	no
ENSG00000101452	ENSG00000101452	DHX35	chr20:38962298-39039723	Control	TC32	OK	4.77565	5.11632	0.0994105	0.226788	0.79025	0.998796	no
ENSG00000101457	ENSG00000101457	DNTTIP1	chr20:45791936-45811427	Control	TC32	OK	15.5274	11.7178	-0.40611	-0.828883	0.31985	0.998796	no
ENSG00000101464	ENSG00000101464	PIGU	chr20:34560541-34825649	Control	TC32	OK	3.80657	7.50654	0.979655	0.582542	0.44065	0.998796	no
ENSG00000101473	ENSG00000101473	ACOT8	chr20:45833809-45857406	Control	TC32	OK	10.6724	8.27416	-0.367201	-0.57215	0.5097	0.998796	no
ENSG00000101474	ENSG00000101474	APMAP	chr20:24962924-24992979	Control	TC32	OK	48.2487	32.6727	-0.562405	-1.74409	0.0426	0.755877	no
ENSG00000101493	ENSG00000101493	ZNF516	chr18:76358189-76495190	Control	TC32	OK	19.9443	13.9881	-0.511779	-0.641563	0.23905	0.998796	no
ENSG00000101544	ENSG00000101544	ADNP2	chr18:80109030-80147523	Control	TC32	OK	8.30857	8.18319	-0.0219381	-0.0337927	0.9636	0.998796	no
ENSG00000101546	ENSG00000101546	RBFA	chr18:80034345-80097088	Control	TC32	OK	9.36543	8.21453	-0.189168	-0.385121	0.64535	0.998796	no
ENSG00000101557	ENSG00000101557	USP14	chr18:158382-268050	Control	TC32	OK	22.6758	30.4888	0.427129	0.54166	0.49515	0.998796	no
ENSG00000101558	ENSG00000101558	VAPA	chr18:9914001-9960021	Control	TC32	OK	54.7847	54.1077	-0.0179382	-0.0395326	0.96215	0.998796	no
ENSG00000101574	ENSG00000101574	METTL4	chr18:2537524-2571509	Control	TC32	OK	6.23006	9.22294	0.56598	0.63871	0.41985	0.998796	no
ENSG00000101577	ENSG00000101577	LPIN2	chr18:2916993-3013315	Control	TC32	OK	14.2287	13.2005	-0.108201	-0.240926	0.7435	0.998796	no
ENSG00000101596	ENSG00000101596	SMCHD1	chr18:2655737-2833065	Control	TC32	OK	65.8527	55.2426	-0.253462	-0.44058	0.6103	0.998796	no
ENSG00000101608	ENSG00000101608	MYL12A	chr18:3247480-3261850	Control	TC32	OK	222.372	218.319	-0.0265398	-0.0747034	0.9295	0.998796	no
ENSG00000101624	ENSG00000101624	CEP76	chr18:12438889-12725740	Control	TC32	OK	5.44926	4.39195	-0.311198	-0.19057	0.8172	0.998796	no
ENSG00000101639	ENSG00000101639	CEP192	chr18:12991361-13125052	Control	TC32	OK	23.5401	17.729	-0.409007	-0.597322	0.4686	0.998796	no
ENSG00000101654	ENSG00000101654	RNMT	chr18:13663346-13764558	Control	TC32	OK	14.7835	20.4609	0.468882	0.723362	0.3187	0.998796	no
ENSG00000101665	ENSG00000101665	SMAD7	chr18:48919852-48950711	Control	TC32	OK	16.5733	23.0515	0.476001	0.931883	0.2308	0.998796	no
ENSG00000101695	ENSG00000101695	RNF125	chr18:32018371-32774413	Control	TC32	OK	7.66556	2.92378	-1.39056	-0.615502	0.1358	0.998796	no
ENSG00000101745	ENSG00000101745	ANKRD12	chr18:9102629-9285985	Control	TC32	OK	44.5409	49.8794	0.163313	0.205805	0.7755	0.998796	no
ENSG00000101751	ENSG00000101751	POLI	chr18:54268345-54321266	Control	TC32	OK	9.21525	9.54523	0.0507554	0.0851004	0.91	0.998796	no
ENSG00000101752	ENSG00000101752	MIB1	chr18:21704956-21870957	Control	TC32	OK	8.73667	8.97206	0.0383553	0.0853556	0.9237	0.998796	no
ENSG00000101773	ENSG00000101773	RBBP8	chr18:22699480-23026488	Control	TC32	OK	15.2803	14.5259	-0.0730396	-0.126223	0.8687	0.998796	no
ENSG00000101782	ENSG00000101782	RIOK3	chr18:23452822-23486603	Control	TC32	OK	58.305	56.073	-0.0563124	-0.0905538	0.9188	0.998796	no
ENSG00000101811	ENSG00000101811	CSTF2	chrX:100820358-100840932	Control	TC32	OK	8.05838	8.12145	0.0112473	0.0210289	0.9802	0.998796	no
ENSG00000101843	ENSG00000101843	PSMD10	chrX:108084206-108091618	Control	TC32	OK	17.0353	15.8886	-0.100539	-0.214648	0.7953	0.998796	no
ENSG00000101844	ENSG00000101844	ATG4A	chrX:108091667-108154671	Control	TC32	OK	5.91678	6.14647	0.0549469	0.0852111	0.90785	0.998796	no
ENSG00000101849	ENSG00000101849	TBL1X	chrX:9463294-9786297	Control	TC32	OK	13.3061	8.52085	-0.643013	-1.2988	0.0439	0.767542	no
ENSG00000101856	ENSG00000101856	PGRMC1	chrX:119236244-119244466	Control	TC32	OK	14.3031	12.9695	-0.141204	-0.367139	0.6701	0.998796	no
ENSG00000101868	ENSG00000101868	POLA1	chrX:24693918-24996986	Control	TC32	OK	5.92814	4.6047	-0.364471	-0.243964	0.6351	0.998796	no
ENSG00000101882	ENSG00000101882	NKAP	chrX:119895836-119992810	Control	TC32	OK	3.87491	4.22105	0.123436	0.150645	0.8524	0.998796	no
ENSG00000101888	ENSG00000101888	NXT2	chrX:109535780-109544690	Control	TC32	OK	3.97404	4.55569	0.197062	0.307443	0.69905	0.998796	no
ENSG00000101898	ENSG00000101898	MCTS2P	chr20:31514427-31577923	Control	TC32	OK	22.5925	26.2243	0.215064	0.123778	0.85765	0.998796	no
ENSG00000101901	ENSG00000101901	ALG13	chrX:111665810-111760649	Control	TC32	OK	26.301	27.6421	0.0717514	0.121024	0.8894	0.998796	no
ENSG00000101911	ENSG00000101911	PRPS2	chrX:12791354-12824222	Control	TC32	OK	18.8675	14.3817	-0.391667	-0.7577	0.3691	0.998796	no
ENSG00000101916	ENSG00000101916	TLR8	chrX:12902816-12923169	Control	TC32	OK	12.6836	9.55309	-0.408927	-1.15412	0.1749	0.998796	no
ENSG00000101928	ENSG00000101928	MOSPD1	chrX:134887625-134915267	Control	TC32	OK	18.656	12.0312	-0.632857	-0.845159	0.3129	0.998796	no
ENSG00000101935	ENSG00000101935	AMMECR1	chrX:110194185-110456334	Control	TC32	OK	2.42187	3.36346	0.473828	0.442264	0.4403	0.998796	no
ENSG00000101940	ENSG00000101940	WDR13	chrX:48590041-48608867	Control	TC32	OK	52.5939	43.5746	-0.27141	-0.549707	0.51595	0.998796	no
ENSG00000101945	ENSG00000101945	SUV39H1	chrX:48695553-48737163	Control	TC32	OK	4.30118	1.75424	-1.29389	-1.80741	0.02445	0.58512	no
ENSG00000101966	ENSG00000101966	XIAP	chrX:123859723-123913979	Control	TC32	OK	36.6143	39.2991	0.102091	0.114055	0.8827	0.998796	no
ENSG00000101972	ENSG00000101972	STAG2	chrX:123959232-124963817	Control	TC32	OK	47.6942	51.8317	0.120019	0.173757	0.82685	0.998796	no
ENSG00000101974	ENSG00000101974	ATP11C	chrX:139726345-139945276	Control	TC32	OK	9.65644	7.98942	-0.273401	-0.367773	0.6213	0.998796	no
ENSG00000101986	ENSG00000101986	ABCD1	chrX:153724867-153785732	Control	TC32	OK	20.1817	16.25	-0.312613	-0.583509	0.47705	0.998796	no
ENSG00000101997	ENSG00000101997	CCDC22	chrX:49235466-49264826	Control	TC32	OK	10.3806	10.6236	0.0333798	0.0687189	0.92955	0.998796	no
ENSG00000102007	ENSG00000102007	PLP2	chrX:49171925-49175239	Control	TC32	OK	45.7976	48.1303	0.071672	0.192605	0.81715	0.998796	no
ENSG00000102030	ENSG00000102030	NAA10	chrX:153861513-153935223	Control	TC32	OK	29.8974	27.4542	-0.122991	-0.166684	0.85035	0.998796	no
ENSG00000102032	ENSG00000102032	RENBP	chrX:153935262-153944691	Control	TC32	OK	64.0359	46.9577	-0.44752	-0.978383	0.24625	0.998796	no
ENSG00000102034	ENSG00000102034	ELF4	chrX:130064873-130110716	Control	TC32	OK	27.9293	28.3105	0.0195534	0.0617658	0.9399	0.998796	no
ENSG00000102054	ENSG00000102054	RBBP7	chrX:16786426-16870414	Control	TC32	OK	54.643	47.3322	-0.207216	-0.444079	0.59365	0.998796	no
ENSG00000102078	ENSG00000102078	SLC25A14	chrX:130339887-130373361	Control	TC32	OK	3.37151	2.80427	-0.265772	-0.391825	0.6369	0.998796	no
ENSG00000102081	ENSG00000102081	FMR1	chrX:147911950-147951125	Control	TC32	OK	26.4841	25.933	-0.0303335	-0.0425735	0.95695	0.998796	no
ENSG00000102096	ENSG00000102096	PIM2	chrX:48913181-48919024	Control	TC32	OK	6.74361	9.294	0.462779	0.929374	0.2683	0.998796	no
ENSG00000102100	ENSG00000102100	SLC35A2	chrX:48903179-48911958	Control	TC32	OK	10.5433	8.9432	-0.237459	-0.505224	0.54485	0.998796	no
ENSG00000102103	ENSG00000102103	PQBP1	chrX:48893446-48903143	Control	TC32	OK	27.7639	26.2252	-0.0822556	-0.183892	0.8327	0.998796	no
ENSG00000102119	ENSG00000102119	EMD	chrX:154379196-154381523	Control	TC32	OK	21.7119	23.6598	0.123954	0.286359	0.7292	0.998796	no
ENSG00000102125	ENSG00000102125	TAZ	chrX:154389954-154421726	Control	TC32	OK	39.7309	39.9227	0.0069484	0.00684498	0.9923	0.998826	no
ENSG00000102144	ENSG00000102144	PGK1	chrX:77910655-78129296	Control	TC32	FAIL	84.6184	106.055	0	0	1	1	no
ENSG00000102158	ENSG00000102158	MAGT1	chrX:77826363-77895593	Control	TC32	OK	20.1741	22.3339	0.146726	0.373494	0.64565	0.998796	no
ENSG00000102172	ENSG00000102172	SMS	chrX:21940572-21994835	Control	TC32	OK	17.3188	6.39869	-1.43649	-3.45844	0.00015	0.0196215	yes
ENSG00000102178	ENSG00000102178	UBL4A	chrX:154483716-154486670	Control	TC32	OK	30.296	23.8312	-0.346274	-0.76634	0.29735	0.998796	no
ENSG00000102181	ENSG00000102181	CD99L2	chrX:150766336-150898816	Control	TC32	OK	10.9819	10.7987	-0.0242795	-0.0550952	0.93875	0.998796	no
ENSG00000102189	ENSG00000102189	EEA1	chr12:92721461-92929331	Control	TC32	OK	33.5827	29.2415	-0.1997	-0.329752	0.64995	0.998796	no
ENSG00000102218	ENSG00000102218	RP2	chrX:46836939-46882358	Control	TC32	OK	10.6412	10.5341	-0.0145847	-0.0415721	0.95875	0.998796	no
ENSG00000102225	ENSG00000102225	CDK16	chrX:47217859-47229997	Control	TC32	OK	26.6618	27.2402	0.0309659	0.0687279	0.93265	0.998796	no
ENSG00000102226	ENSG00000102226	USP11	chrX:47232689-47248328	Control	TC32	OK	11.1239	9.0855	-0.292027	-0.468415	0.55335	0.998796	no
ENSG00000102241	ENSG00000102241	HTATSF1	chrX:136497078-136512346	Control	TC32	OK	20.1513	19.1744	-0.0716914	-0.209948	0.79815	0.998796	no
ENSG00000102265	ENSG00000102265	TIMP1	chrX:47561099-47630305	Control	TC32	OK	45.1009	189.203	2.06871	3.17589	0.0022	0.139168	no
ENSG00000102309	ENSG00000102309	PIN4	chrX:72181352-72307187	Control	TC32	OK	2.89105	3.4743	0.26513	0.149227	0.8692	0.998796	no
ENSG00000102316	ENSG00000102316	MAGED2	chrX:54807598-54816012	Control	TC32	OK	24.1149	14.9885	-0.68607	-1.33818	0.08705	0.954863	no
ENSG00000102317	ENSG00000102317	RBM3	chrX:48568013-48579066	Control	TC32	OK	90.7934	87.1213	-0.0595621	-0.137511	0.86545	0.998796	no
ENSG00000102349	ENSG00000102349	KLF8	chrX:56232420-56287889	Control	TC32	OK	3.89006	2.74373	-0.50365	-0.837187	0.3158	0.998796	no
ENSG00000102390	ENSG00000102390	PBDC1	chrX:76172935-76178204	Control	TC32	OK	31.0534	30.5565	-0.0232739	-0.0632891	0.9427	0.998796	no
ENSG00000102393	ENSG00000102393	GLA	chrX:101390823-101414133	Control	TC32	OK	102.019	103.913	0.0265432	0.0457777	0.9556	0.998796	no
ENSG00000102401	ENSG00000102401	ARMCX3	chrX:101622796-101627843	Control	TC32	OK	24.1316	20.8952	-0.207749	-0.418801	0.62125	0.998796	no
ENSG00000102409	ENSG00000102409	BEX4	chrX:103215091-103217246	Control	TC32	OK	16.1524	14.0197	-0.204293	-0.487419	0.5663	0.998796	no
ENSG00000102471	ENSG00000102471	NDFIP2	chr13:79477363-79556075	Control	TC32	OK	2.77172	3.61727	0.384122	0.224443	0.74265	0.998796	no
ENSG00000102524	ENSG00000102524	TNFSF13B	chr13:108251239-108308484	Control	TC32	OK	20.1876	22.686	0.16833	0.242404	0.7563	0.998796	no
ENSG00000102531	ENSG00000102531	FNDC3A	chr13:48974966-49209779	Control	TC32	OK	41.0979	33.6223	-0.289647	-0.728812	0.35805	0.998796	no
ENSG00000102543	ENSG00000102543	CDADC1	chr13:49247924-49293485	Control	TC32	OK	2.22682	3.09432	0.474636	0.581901	0.4687	0.998796	no
ENSG00000102547	ENSG00000102547	CAB39L	chr13:49308649-49444126	Control	TC32	OK	6.71508	6.40783	-0.0675702	-0.116588	0.87915	0.998796	no
ENSG00000102572	ENSG00000102572	STK24	chr13:98142561-98578830	Control	TC32	OK	53.2085	41.3193	-0.364839	-0.644678	0.3622	0.998796	no
ENSG00000102575	ENSG00000102575	ACP5	chr19:11559373-11619135	Control	TC32	OK	2897.97	1718.49	-0.753899	-1.66279	0.0494	0.803569	no
ENSG00000102580	ENSG00000102580	DNAJC3	chr13:95677138-95794989	Control	TC32	OK	31.9471	32.6206	0.0301017	0.0867141	0.92135	0.998796	no
ENSG00000102595	ENSG00000102595	UGGT2	chr13:95801579-96053482	Control	TC32	OK	7.60071	7.37069	-0.0443348	-0.0706886	0.92595	0.998796	no
ENSG00000102606	ENSG00000102606	ARHGEF7	chr13:111113811-111305737	Control	TC32	OK	37.0984	34.5285	-0.103569	-0.169987	0.8375	0.998796	no
ENSG00000102699	ENSG00000102699	PARP4	chr13:24408156-24597676	Control	TC32	OK	55.4837	48.8276	-0.184369	-0.307891	0.6119	0.998796	no
ENSG00000102710	ENSG00000102710	SUPT20H	chr13:36949774-37059713	Control	TC32	OK	21.5629	26.6069	0.303254	0.468869	0.58125	0.998796	no
ENSG00000102738	ENSG00000102738	MRPS31	chr13:40729134-40771173	Control	TC32	OK	11.3433	9.31553	-0.284136	-0.523158	0.5347	0.998796	no
ENSG00000102743	ENSG00000102743	SLC25A15	chr13:40789411-40810111	Control	TC32	OK	2.8271	3.26617	0.208276	0.246326	0.7315	0.998796	no
ENSG00000102753	ENSG00000102753	KPNA3	chr13:49699306-49793307	Control	TC32	OK	10.5527	10.342	-0.0290911	-0.077272	0.9202	0.998796	no
ENSG00000102755	ENSG00000102755	FLT1	chr13:28300343-28495145	Control	TC32	OK	42.7767	21.3167	-1.00484	-2.77135	0.00105	0.0831629	no
ENSG00000102760	ENSG00000102760	RGCC	chr13:41457558-41470882	Control	TC32	OK	35.0312	38.2486	0.126767	0.328982	0.6887	0.998796	no
ENSG00000102763	ENSG00000102763	VWA8	chr13:41566836-41981565	Control	TC32	OK	5.25138	9.15381	0.801676	0.787469	0.12465	0.998796	no
ENSG00000102780	ENSG00000102780	DGKH	chr13:42040035-42256578	Control	TC32	OK	7.28132	10.5197	0.530823	0.674676	0.32635	0.998796	no
ENSG00000102781	ENSG00000102781	KATNAL1	chr13:30202629-30307484	Control	TC32	OK	2.17504	3.47194	0.674699	0.698265	0.2932	0.998796	no
ENSG00000102786	ENSG00000102786	INTS6	chr13:51335772-51552364	Control	TC32	OK	17.8221	16.3731	-0.12234	-0.147989	0.81265	0.998796	no
ENSG00000102796	ENSG00000102796	DHRS12	chr13:51584454-51845175	Control	TC32	OK	2.84299	2.87426	0.0157819	0.0093765	0.98965	0.998796	no
ENSG00000102804	ENSG00000102804	TSC22D1	chr13:44432142-44580432	Control	TC32	OK	26.4609	29.2179	0.142992	0.231461	0.7458	0.998796	no
ENSG00000102805	ENSG00000102805	CLN5	chr13:76990659-77327050	Control	TC32	OK	20.016	31.0219	0.632131	0.622429	0.40765	0.998796	no
ENSG00000102858	ENSG00000102858	MGRN1	chr16:4616492-4690974	Control	TC32	OK	72.942	55.543	-0.393144	-0.685783	0.4324	0.998796	no
ENSG00000102870	ENSG00000102870	ZNF629	chr16:30778448-30787202	Control	TC32	OK	6.66635	5.47854	-0.283107	-0.793613	0.3594	0.998796	no
ENSG00000102871	ENSG00000102871	TRADD	chr16:67154179-67169945	Control	TC32	OK	8.11615	7.07202	-0.198674	-0.228762	0.7526	0.998796	no
ENSG00000102878	ENSG00000102878	HSF4	chr16:67154179-67169945	Control	TC32	OK	7.21701	3.92189	-0.879853	-0.806565	0.29645	0.998796	no
ENSG00000102879	ENSG00000102879	CORO1A	chr16:30182826-30189076	Control	TC32	OK	35.7042	13.705	-1.38139	-2.54371	0.0039	0.202415	no
ENSG00000102882	ENSG00000102882	MAPK3	chr16:30114104-30123506	Control	TC32	OK	33.3822	24.3283	-0.456443	-0.739721	0.39825	0.998796	no
ENSG00000102893	ENSG00000102893	PHKB	chr16:47144322-47701523	Control	TC32	OK	40.3474	47.8139	0.244956	0.339811	0.67935	0.998796	no
ENSG00000102897	ENSG00000102897	LYRM1	chr16:20610242-20925006	Control	TC32	OK	11.0561	14.4283	0.384057	0.341682	0.63955	0.998796	no
ENSG00000102898	ENSG00000102898	NUTF2	chr16:67806764-67872567	Control	TC32	OK	18.559	28.1629	0.60168	0.968768	0.2368	0.998796	no
ENSG00000102900	ENSG00000102900	NUP93	chr16:56730104-56850286	Control	TC32	OK	55.5487	54.1819	-0.0359415	-0.0700139	0.93765	0.998796	no
ENSG00000102901	ENSG00000102901	CENPT	chr16:67806764-67872567	Control	TC32	OK	16.3816	15.1756	-0.110325	-0.151949	0.85525	0.998796	no
ENSG00000102908	ENSG00000102908	NFAT5	chr16:69565093-69704666	Control	TC32	OK	20.694	29.2545	0.499442	0.786236	0.23505	0.998796	no
ENSG00000102910	ENSG00000102910	LONP2	chr16:48164951-48448402	Control	TC32	OK	23.3706	22.7596	-0.0382209	-0.0709382	0.92285	0.998796	no
ENSG00000102921	ENSG00000102921	N4BP1	chr16:48538725-48620148	Control	TC32	OK	38.9894	65.0523	0.738517	1.32611	0.0752	0.903181	no
ENSG00000102931	ENSG00000102931	ARL2BP	chr16:57245097-57284687	Control	TC32	OK	12.7363	11.4136	-0.158196	-0.362198	0.6683	0.998796	no
ENSG00000102934	ENSG00000102934	PLLP	chr16:57245097-57284687	Control	TC32	OK	6.02079	1.32635	-2.18249	-1.13499	0.07435	0.8997	no
ENSG00000102962	ENSG00000102962	CCL22	chr16:57358771-57366190	Control	TC32	OK	767.183	685.412	-0.1626	-0.459893	0.58705	0.998796	no
ENSG00000102967	ENSG00000102967	DHODH	chr16:72008587-72027664	Control	TC32	OK	2.65251	2.53377	-0.0660751	-0.108035	0.88355	0.998796	no
ENSG00000102970	ENSG00000102970	CCL17	chr16:57404766-57416062	Control	TC32	OK	14.9842	34.7934	1.21537	2.51832	0.00415	0.209376	no
ENSG00000102974	ENSG00000102974	CTCF	chr16:67549213-67639185	Control	TC32	OK	27.328	30.3623	0.151899	0.390798	0.64155	0.998796	no
ENSG00000102977	ENSG00000102977	ACD	chr16:67644918-67660815	Control	TC32	OK	5.73853	4.35281	-0.398735	-0.609421	0.4377	0.998796	no
ENSG00000102978	ENSG00000102978	POLR2C	chr16:57428168-57487327	Control	TC32	OK	17.8752	22.9364	0.359676	0.58007	0.4525	0.998796	no
ENSG00000102984	ENSG00000102984	ZNF821	chr16:71845990-71999978	Control	TC32	OK	5.6634	3.00656	-0.913554	-0.356237	0.40805	0.998796	no
ENSG00000103005	ENSG00000103005	USB1	chr16:57994667-58021618	Control	TC32	OK	44.6777	43.4706	-0.0395164	-0.0742917	0.9316	0.998796	no
ENSG00000103018	ENSG00000103018	CYB5B	chr16:69424524-69466266	Control	TC32	OK	33.4777	34.6051	0.0477817	0.105317	0.89895	0.998796	no
ENSG00000103024	ENSG00000103024	NME3	chr16:1706182-1771730	Control	TC32	OK	10.3831	9.8489	-0.0762042	-0.0630205	0.94755	0.998796	no
ENSG00000103035	ENSG00000103035	PSMD7	chr16:74296774-74369826	Control	TC32	OK	49.7319	46.9248	-0.0838198	-0.15423	0.8535	0.998796	no
ENSG00000103037	ENSG00000103037	SETD6	chr16:58515478-58629886	Control	TC32	OK	10.7429	12.081	0.169358	0.0999332	0.8469	0.998796	no
ENSG00000103042	ENSG00000103042	SLC38A7	chr16:58665108-58685104	Control	TC32	FAIL	29.1458	25.2412	0	0	1	1	no
ENSG00000103043	ENSG00000103043	VAC14	chr16:70687438-70801161	Control	TC32	OK	95.3239	130.279	0.450694	0.792114	0.3367	0.998796	no
ENSG00000103047	ENSG00000103047	TANGO6	chr16:68843603-69085180	Control	TC32	OK	16.1925	11.7972	-0.456878	-0.706504	0.3447	0.998796	no
ENSG00000103051	ENSG00000103051	COG4	chr16:70480567-70523565	Control	TC32	OK	16.9945	11.4693	-0.567288	-1.10071	0.16135	0.998796	no
ENSG00000103061	ENSG00000103061	SLC7A6OS	chr16:68264515-68310946	Control	TC32	OK	16.441	10.6483	-0.62667	-0.708314	0.3025	0.998796	no
ENSG00000103064	ENSG00000103064	SLC7A6	chr16:68264515-68310946	Control	TC32	OK	12.229	13.8521	0.179795	0.183408	0.77135	0.998796	no
ENSG00000103066	ENSG00000103066	PLA2G15	chr16:68245303-68261062	Control	TC32	OK	26.8878	6.80075	-1.98319	-3.96791	5e-05	0.00772968	yes
ENSG00000103067	ENSG00000103067	ESRP2	chr16:67987393-68238102	Control	TC32	OK	4.39042	1.90025	-1.20817	-0.392354	0.3433	0.998796	no
ENSG00000103091	ENSG00000103091	WDR59	chr16:74871366-75110994	Control	TC32	OK	21.128	21.7175	0.039699	0.057417	0.95095	0.998796	no
ENSG00000103111	ENSG00000103111	MON1B	chr16:77190834-77444336	Control	TC32	OK	38.467	37.7337	-0.0277694	-0.0529837	0.9488	0.998796	no
ENSG00000103121	ENSG00000103121	CMC2	chr16:80966447-81096425	Control	TC32	OK	22.6431	24.9156	0.137979	0.145414	0.8638	0.998796	no
ENSG00000103126	ENSG00000103126	AXIN1	chr16:287439-352673	Control	TC32	OK	17.2411	15.0566	-0.195458	-0.332131	0.5724	0.998796	no
ENSG00000103145	ENSG00000103145	HCFC1R1	chr16:3022619-3039133	Control	TC32	OK	19.3417	17.87	-0.114174	-0.19641	0.82275	0.998796	no
ENSG00000103148	ENSG00000103148	NPRL3	chr16:77006-138860	Control	TC32	OK	17.3821	11.9904	-0.535718	-0.867095	0.2735	0.998796	no
ENSG00000103150	ENSG00000103150	MLYCD	chr16:83899125-83966332	Control	TC32	OK	7.29662	6.81149	-0.099258	-0.230474	0.7861	0.998796	no
ENSG00000103152	ENSG00000103152	MPG	chr16:77006-138860	Control	TC32	OK	40.2564	22.0238	-0.870153	-1.53187	0.077	0.909311	no
ENSG00000103160	ENSG00000103160	HSDL1	chr16:84122145-84145192	Control	TC32	OK	8.43899	9.15294	0.117166	0.201982	0.77545	0.998796	no
ENSG00000103168	ENSG00000103168	TAF1C	chr16:84145286-84187070	Control	TC32	OK	17.726	15.0435	-0.236732	-0.318166	0.6359	0.998796	no
ENSG00000103174	ENSG00000103174	NAGPA	chr16:4882506-5097808	Control	TC32	OK	65.6131	49.9797	-0.392642	-0.578761	0.47515	0.998796	no
ENSG00000103187	ENSG00000103187	COTL1	chr16:84565593-84618077	Control	TC32	OK	392.509	341.955	-0.198917	-0.562738	0.48225	0.998796	no
ENSG00000103194	ENSG00000103194	USP10	chr16:84699977-84779922	Control	TC32	OK	35.5588	36.2305	0.0269966	0.0552506	0.9443	0.998796	no
ENSG00000103197	ENSG00000103197	TSC2	chr16:2039814-2135898	Control	TC32	OK	63.3708	64.8254	0.0327427	0.0283276	0.9617	0.998796	no
ENSG00000103199	ENSG00000103199	ZNF500	chr16:4696509-4767624	Control	TC32	OK	9.03665	5.89735	-0.615721	-0.555304	0.39355	0.998796	no
ENSG00000103202	ENSG00000103202	NME4	chr16:396724-412487	Control	TC32	OK	8.2264	9.73535	0.242971	0.460928	0.5881	0.998796	no
ENSG00000103222	ENSG00000103222	ABCC1	chr16:15949576-16143074	Control	TC32	OK	15.0698	21.0627	0.483029	1.0009	0.1728	0.998796	no
ENSG00000103226	ENSG00000103226	NOMO3	chr16:16232494-16294814	Control	TC32	OK	21.1478	22.8616	0.112419	0.179671	0.8155	0.998796	no
ENSG00000103227	ENSG00000103227	LMF1	chr16:853633-981596	Control	TC32	OK	8.8232	8.48884	-0.0557341	-0.0729932	0.9334	0.998796	no
ENSG00000103245	ENSG00000103245	NARFL	chr16:720580-741329	Control	TC32	OK	19.7218	21.1769	0.102697	0.147429	0.84795	0.998796	no
ENSG00000103248	ENSG00000103248	MTHFSD	chr16:86530175-86555235	Control	TC32	OK	9.95253	9.85405	-0.0143475	-0.0242811	0.9775	0.998796	no
ENSG00000103249	ENSG00000103249	CLCN7	chr16:1444933-1475580	Control	TC32	OK	105.798	84.8077	-0.319043	-0.632736	0.4166	0.998796	no
ENSG00000103253	ENSG00000103253	HAGHL	chr16:720580-741329	Control	TC32	OK	28.6403	15.1209	-0.921504	-1.14325	0.1708	0.998796	no
ENSG00000103254	ENSG00000103254	FAM173A	chr16:720580-741329	Control	TC32	OK	25.3737	13.8196	-0.876616	-0.802946	0.39945	0.998796	no
ENSG00000103257	ENSG00000103257	SLC7A5	chr16:87830022-87869488	Control	TC32	OK	31.1417	65.1779	1.06553	2.26309	0.00785	0.293958	no
ENSG00000103264	ENSG00000103264	FBXO31	chr16:87083561-87404779	Control	TC32	OK	8.80485	7.0316	-0.324446	-0.220468	0.67975	0.998796	no
ENSG00000103266	ENSG00000103266	STUB1	chr16:680223-684528	Control	TC32	OK	34.1573	31.129	-0.133937	-0.201567	0.80655	0.998796	no
ENSG00000103274	ENSG00000103274	NUBP1	chr16:10743785-10818794	Control	TC32	OK	42.0383	38.6949	-0.119562	-0.270193	0.74825	0.998796	no
ENSG00000103275	ENSG00000103275	UBE2I	chr16:1305546-1327018	Control	TC32	OK	75.7136	71.0788	-0.0911335	-0.21788	0.7893	0.998796	no
ENSG00000103319	ENSG00000103319	EEF2K	chr16:22206281-22288738	Control	TC32	OK	5.59703	6.551	0.227052	0.247024	0.7616	0.998796	no
ENSG00000103326	ENSG00000103326	CAPN15	chr16:527716-554636	Control	TC32	OK	19.0565	16.1836	-0.235747	-0.561994	0.488	0.998796	no
ENSG00000103335	ENSG00000103335	PIEZO1	chr16:88706462-88785220	Control	TC32	OK	167.752	85.2614	-0.976363	-1.35028	0.08315	0.935324	no
ENSG00000103342	ENSG00000103342	GSPT1	chr16:11851648-11916082	Control	TC32	OK	52.8717	53.1142	0.00660114	0.0118905	0.9892	0.998796	no
ENSG00000103343	ENSG00000103343	ZNF174	chr16:3365098-3577400	Control	TC32	OK	5.83952	3.56806	-0.71071	-0.504316	0.53815	0.998796	no
ENSG00000103351	ENSG00000103351	CLUAP1	chr16:3365098-3577400	Control	TC32	OK	6.56856	5.30016	-0.309541	-0.151486	0.7917	0.998796	no
ENSG00000103353	ENSG00000103353	UBFD1	chr16:23522013-23574389	Control	TC32	OK	8.95287	8.29366	-0.110341	-0.140485	0.8145	0.998796	no
ENSG00000103356	ENSG00000103356	EARS2	chr16:23522013-23574389	Control	TC32	OK	13.6001	17.3199	0.348813	0.441328	0.53565	0.998796	no
ENSG00000103363	ENSG00000103363	ELOB	chr16:2737075-2777297	Control	TC32	OK	116.296	96.8407	-0.264118	-0.0839487	0.90435	0.998796	no
ENSG00000103365	ENSG00000103365	GGA2	chr16:23463541-23521995	Control	TC32	OK	144.649	73.3479	-0.97973	-1.85483	0.022	0.555457	no
ENSG00000103381	ENSG00000103381	CPPED1	chr16:12659798-12804017	Control	TC32	OK	34.7055	37.4104	0.108275	0.194844	0.8098	0.998796	no
ENSG00000103404	ENSG00000103404	USP31	chr16:23061405-23149270	Control	TC32	OK	5.09499	6.54395	0.361082	0.672169	0.41105	0.998796	no
ENSG00000103415	ENSG00000103415	HMOX2	chr16:4461679-4510347	Control	TC32	OK	23.0407	15.6636	-0.556765	-1.16485	0.1758	0.998796	no
ENSG00000103423	ENSG00000103423	DNAJA3	chr16:4425804-4456775	Control	TC32	OK	16.9276	21.2343	0.327017	0.485563	0.5645	0.998796	no
ENSG00000103429	ENSG00000103429	BFAR	chr16:14632814-14669236	Control	TC32	OK	18.8968	17.7394	-0.0911868	-0.156472	0.8426	0.998796	no
ENSG00000103472	ENSG00000103472	RRN3P2	chr16:29053731-29372110	Control	TC32	OK	4.91432	5.09232	0.0513311	0.0583559	0.9427	0.998796	no
ENSG00000103479	ENSG00000103479	RBL2	chr16:53433976-53504411	Control	TC32	OK	40.2622	32.7188	-0.299307	-0.497347	0.55425	0.998796	no
ENSG00000103485	ENSG00000103485	QPRT	chr16:29662978-29698699	Control	TC32	OK	5.17893	1.87298	-1.46732	-0.358696	0.34755	0.998796	no
ENSG00000103489	ENSG00000103489	XYLT1	chr16:17101768-17470881	Control	TC32	OK	7.30204	2.81289	-1.37624	-1.66877	0.0043	0.21544	no
ENSG00000103490	ENSG00000103490	PYCARD	chr16:31201484-31203452	Control	TC32	OK	51.9158	26.7489	-0.956694	-2.33809	0.00785	0.293958	no
ENSG00000103495	ENSG00000103495	MAZ	chr16:29806105-29848039	Control	TC32	OK	161.887	131.815	-0.29647	-0.470409	0.5726	0.998796	no
ENSG00000103496	ENSG00000103496	STX4	chr16:31032888-31042975	Control	TC32	OK	165.569	162.28	-0.0289464	-0.0734404	0.93055	0.998796	no
ENSG00000103502	ENSG00000103502	CDIPT	chr16:29858356-29868053	Control	TC32	OK	23.601	21.0479	-0.165174	-0.446086	0.6057	0.998796	no
ENSG00000103507	ENSG00000103507	BCKDK	chr16:31106106-31112791	Control	TC32	OK	57.8959	49.6253	-0.222383	-0.462457	0.54205	0.998796	no
ENSG00000103510	ENSG00000103510	KAT8	chr16:31115753-31131393	Control	TC32	OK	53.5153	51.6807	-0.0503261	-0.125814	0.88015	0.998796	no
ENSG00000103512	ENSG00000103512	NOMO1	chr16:14833680-14896160	Control	TC32	OK	12.7577	11.3761	-0.165362	-0.318315	0.67775	0.998796	no
ENSG00000103522	ENSG00000103522	IL21R	chr16:27402161-27453393	Control	TC32	OK	6.16177	8.58877	0.479106	0.735193	0.2925	0.998796	no
ENSG00000103528	ENSG00000103528	SYT17	chr16:19113931-19268334	Control	TC32	OK	16.4505	27.2882	0.730146	0.687682	0.35165	0.998796	no
ENSG00000103540	ENSG00000103540	CCP110	chr16:19523810-19553408	Control	TC32	OK	5.42595	4.89273	-0.149237	-0.168816	0.83595	0.998796	no
ENSG00000103544	ENSG00000103544	VPS35L	chr16:19555239-19886167	Control	TC32	OK	62.3448	52.3933	-0.250886	-0.414775	0.64575	0.998796	no
ENSG00000103549	ENSG00000103549	RNF40	chr16:30697706-30776307	Control	TC32	OK	43.0915	40.1005	-0.103784	-0.0944578	0.87585	0.998796	no
ENSG00000103550	ENSG00000103550	KNOP1	chr16:19555239-19886167	Control	TC32	OK	10.7336	9.12193	-0.23473	-0.240033	0.7713	0.998796	no
ENSG00000103569	ENSG00000103569	AQP9	chr15:57953423-58569843	Control	TC32	OK	129.366	148.74	0.201335	0.436494	0.56515	0.998796	no
ENSG00000103591	ENSG00000103591	AAGAB	chr15:67201032-67530143	Control	TC32	OK	13.0232	15.5847	0.259047	0.530749	0.50085	0.998796	no
ENSG00000103642	ENSG00000103642	LACTB	chr15:63121799-63158021	Control	TC32	OK	71.7239	73.6855	0.0389261	0.0803379	0.9116	0.998796	no
ENSG00000103653	ENSG00000103653	CSK	chr15:74782056-74803198	Control	TC32	OK	129.325	108.243	-0.256725	-0.574346	0.47545	0.998796	no
ENSG00000103657	ENSG00000103657	HERC1	chr15:63608617-63833942	Control	TC32	OK	72.7145	68.9121	-0.0774863	-0.0940791	0.89805	0.998796	no
ENSG00000103671	ENSG00000103671	TRIP4	chr15:64387747-64455303	Control	TC32	OK	16.2136	22.0214	0.441703	0.844671	0.30615	0.998796	no
ENSG00000103707	ENSG00000103707	MTFMT	chr15:65001511-65029639	Control	TC32	OK	13.8707	8.2966	-0.741448	-0.614235	0.34265	0.998796	no
ENSG00000103769	ENSG00000103769	RAB11A	chr15:65611365-65891991	Control	TC32	OK	61.7999	75.2091	0.283304	0.284406	0.7363	0.998796	no
ENSG00000103811	ENSG00000103811	CTSH	chr15:78921057-78949574	Control	TC32	OK	301.038	374.862	0.316414	0.809207	0.33805	0.998796	no
ENSG00000103852	ENSG00000103852	TTC23	chr15:99136322-99251223	Control	TC32	OK	4.07805	5.66127	0.473246	0.557987	0.45595	0.998796	no
ENSG00000103855	ENSG00000103855	CD276	chr15:73683965-73714518	Control	TC32	OK	88.1281	93.183	0.0804652	0.218013	0.79265	0.998796	no
ENSG00000103876	ENSG00000103876	FAH	chr15:80152489-80186946	Control	TC32	OK	34.6324	27.8533	-0.314273	-0.366848	0.6624	0.998796	no
ENSG00000103932	ENSG00000103932	RPAP1	chr15:41517175-41544269	Control	TC32	OK	11.7812	15.3752	0.38412	0.568135	0.49395	0.998796	no
ENSG00000103942	ENSG00000103942	HOMER2	chr15:82836945-83103443	Control	TC32	OK	22.7861	10.8955	-1.06442	-0.468746	0.2548	0.998796	no
ENSG00000103966	ENSG00000103966	EHD4	chr15:41828084-41972578	Control	TC32	OK	23.6357	16.5548	-0.513717	-1.28834	0.1161	0.998796	no
ENSG00000103978	ENSG00000103978	TMEM87A	chr15:42208412-42412318	Control	TC32	OK	17.8637	17.6605	-0.0165084	-0.0177204	0.98285	0.998796	no
ENSG00000103994	ENSG00000103994	ZNF106	chr15:42412822-42491123	Control	TC32	OK	69.1705	59.354	-0.220811	-0.355052	0.57615	0.998796	no
ENSG00000103995	ENSG00000103995	CEP152	chr15:48712927-48811909	Control	TC32	OK	6.72111	7.05858	0.0706792	0.0525407	0.9273	0.998796	no
ENSG00000104047	ENSG00000104047	DTWD1	chr15:49620979-49656232	Control	TC32	OK	7.28488	5.5874	-0.382727	-0.453536	0.60515	0.998796	no
ENSG00000104064	ENSG00000104064	GABPB1	chr15:50275391-50372202	Control	TC32	OK	9.95701	13.4132	0.429866	0.301669	0.5643	0.998796	no
ENSG00000104081	ENSG00000104081	BMF	chr15:40087889-40108892	Control	TC32	OK	18.4893	7.57026	-1.28827	-2.12645	0.00075	0.0641472	no
ENSG00000104093	ENSG00000104093	DMXL2	chr15:51414096-51622833	Control	TC32	OK	95.3307	88.0899	-0.113964	-0.163298	0.7915	0.998796	no
ENSG00000104129	ENSG00000104129	DNAJC17	chr15:40764019-40815084	Control	TC32	OK	10.4472	12.0207	0.202399	0.171913	0.8647	0.998796	no
ENSG00000104131	ENSG00000104131	EIF3J	chr15:44537056-44663678	Control	TC32	OK	23.2828	29.9173	0.361712	0.354114	0.62685	0.998796	no
ENSG00000104133	ENSG00000104133	SPG11	chr15:44537056-44663678	Control	TC32	OK	127.352	103.643	-0.297192	-0.431474	0.6077	0.998796	no
ENSG00000104142	ENSG00000104142	VPS18	chr15:40894429-40903975	Control	TC32	OK	20.1599	17.0389	-0.242663	-0.659976	0.40965	0.998796	no
ENSG00000104154	ENSG00000104154	SLC30A4	chr15:45430528-45586304	Control	TC32	OK	1.03808	15.6138	3.91084	3.64428	0.0001	0.0140335	yes
ENSG00000104164	ENSG00000104164	BLOC1S6	chr15:45587122-45691294	Control	TC32	OK	37.9854	37.8184	-0.00635651	-0.0087077	0.98875	0.998796	no
ENSG00000104205	ENSG00000104205	SGK3	chr8:66667595-66862022	Control	TC32	OK	29.6522	24.6444	-0.26688	-0.430585	0.5612	0.998796	no
ENSG00000104218	ENSG00000104218	CSPP1	chr8:66964098-67343677	Control	TC32	OK	4.01024	3.4979	-0.1972	-0.102503	0.84335	0.998796	no
ENSG00000104219	ENSG00000104219	ZDHHC2	chr8:17156028-17224799	Control	TC32	OK	2.50633	7.10747	1.50376	1.58616	0.0534	0.813921	no
ENSG00000104221	ENSG00000104221	BRF2	chr8:37784190-37849904	Control	TC32	OK	4.23309	4.2129	-0.00689868	-0.0109388	0.9894	0.998796	no
ENSG00000104228	ENSG00000104228	TRIM35	chr8:27284886-27311319	Control	TC32	OK	16.6937	7.08609	-1.23624	-1.3958	0.07885	0.917294	no
ENSG00000104231	ENSG00000104231	ZFAND1	chr8:81701333-81759515	Control	TC32	OK	14.0252	12.6361	-0.150467	-0.270258	0.7419	0.998796	no
ENSG00000104267	ENSG00000104267	CA2	chr8:85327607-85481493	Control	TC32	OK	47.8285	44.8721	-0.0920546	-0.197652	0.8157	0.998796	no
ENSG00000104299	ENSG00000104299	INTS9	chr8:28767660-28890242	Control	TC32	OK	13.6319	24.8596	0.866813	1.28517	0.1281	0.998796	no
ENSG00000104312	ENSG00000104312	RIPK2	chr8:89757746-89791063	Control	TC32	OK	16.8907	33.4093	0.984015	2.41833	0.0021	0.135209	no
ENSG00000104320	ENSG00000104320	NBN	chr8:89933335-90052092	Control	TC32	OK	30.2343	63.6006	1.07285	1.5706	0.0372	0.722725	no
ENSG00000104321	ENSG00000104321	TRPA1	chr8:71828166-72118393	Control	TC32	OK	13.564	18.5701	0.4532	0.303375	0.7578	0.998796	no
ENSG00000104324	ENSG00000104324	CPQ	chr8:96645226-97149654	Control	TC32	OK	37.9999	40.6661	0.0978297	0.219758	0.7925	0.998796	no
ENSG00000104325	ENSG00000104325	DECR1	chr8:89933335-90052092	Control	TC32	OK	70.132	46.3414	-0.597772	-0.76024	0.3474	0.998796	no
ENSG00000104331	ENSG00000104331	IMPAD1	chr8:56957932-56993844	Control	TC32	OK	20.9628	20.2975	-0.0465253	-0.0835128	0.8901	0.998796	no
ENSG00000104343	ENSG00000104343	UBE2W	chr8:73420003-73878910	Control	TC32	OK	12.3426	14.2883	0.211183	0.380691	0.6407	0.998796	no
ENSG00000104356	ENSG00000104356	POP1	chr8:98117296-98159834	Control	TC32	OK	5.28974	5.53564	0.0655525	0.0883996	0.89425	0.998796	no
ENSG00000104361	ENSG00000104361	NIPAL2	chr8:98189832-98294393	Control	TC32	OK	4.03034	10.1757	1.33615	2.24546	0.00235	0.145163	no
ENSG00000104365	ENSG00000104365	IKBKB	chr8:42271301-42332653	Control	TC32	OK	80.5946	80.5131	-0.00145942	-0.00233319	0.9981	0.99931	no
ENSG00000104375	ENSG00000104375	STK3	chr8:98401402-98942827	Control	TC32	OK	13.1006	18.4396	0.493172	0.803318	0.35695	0.998796	no
ENSG00000104381	ENSG00000104381	GDAP1	chr8:74234699-74488872	Control	TC32	OK	2.60462	3.15011	0.27433	0.262721	0.6842	0.998796	no
ENSG00000104388	ENSG00000104388	RAB2A	chr8:60516856-60623627	Control	TC32	OK	44.6828	55.9974	0.325639	0.555651	0.50245	0.998796	no
ENSG00000104408	ENSG00000104408	EIF3E	chr8:108201215-108435333	Control	TC32	OK	41.754	63.838	0.6125	1.48174	0.0876	0.956363	no
ENSG00000104412	ENSG00000104412	EMC2	chr8:108443600-108486918	Control	TC32	OK	10.2063	16.8581	0.723989	1.12691	0.1698	0.998796	no
ENSG00000104419	ENSG00000104419	NDRG1	chr8:133237170-133302022	Control	TC32	OK	63.7924	63.7235	-0.00155941	-0.00259296	0.99795	0.99931	no
ENSG00000104427	ENSG00000104427	ZC2HC1A	chr8:78666046-78805523	Control	TC32	OK	10.8916	4.92365	-1.14542	-1.15483	0.1541	0.998796	no
ENSG00000104432	ENSG00000104432	IL7	chr8:78666046-78805523	Control	TC32	OK	2.90923	5.03909	0.792526	0.577898	0.44105	0.998796	no
ENSG00000104442	ENSG00000104442	ARMC1	chr8:65602455-65634217	Control	TC32	OK	7.98359	8.13902	0.0278179	0.0581572	0.94285	0.998796	no
ENSG00000104447	ENSG00000104447	TRPS1	chr8:115408495-115809673	Control	TC32	OK	12.9052	12.7968	-0.0121767	-0.0229144	0.97215	0.998796	no
ENSG00000104472	ENSG00000104472	CHRAC1	chr8:140511297-140517137	Control	TC32	OK	9.49786	13.2195	0.476996	0.913743	0.27205	0.998796	no
ENSG00000104497	ENSG00000104497	SNX16	chr8:81791822-81842866	Control	TC32	OK	4.06563	9.64051	1.24563	1.98207	0.02625	0.611492	no
ENSG00000104517	ENSG00000104517	UBR5	chr8:102239393-102412841	Control	TC32	OK	49.6785	47.7017	-0.0585806	-0.0816327	0.90165	0.998796	no
ENSG00000104518	ENSG00000104518	GSDMD	chr8:143553206-143563062	Control	TC32	OK	16.8708	11.9578	-0.496576	-0.752704	0.3784	0.998796	no
ENSG00000104522	ENSG00000104522	TSTA3	chr8:143612617-143618048	Control	TC32	OK	11.7635	9.23603	-0.348979	-0.595821	0.48875	0.998796	no
ENSG00000104529	ENSG00000104529	EEF1D	chr8:143573489-143603224	Control	TC32	OK	53.76	53.3192	-0.0118783	-0.0237711	0.9786	0.998796	no
ENSG00000104549	ENSG00000104549	SQLE	chr8:124998496-125022283	Control	TC32	OK	27.2579	34.037	0.32043	0.612002	0.4611	0.998796	no
ENSG00000104613	ENSG00000104613	INTS10	chr8:19817139-19852083	Control	TC32	OK	75.4403	63.4685	-0.249294	-0.372689	0.63975	0.998796	no
ENSG00000104626	ENSG00000104626	ERI1	chr8:9002146-9116746	Control	TC32	OK	10.6371	6.81185	-0.642989	-1.05785	0.1699	0.998796	no
ENSG00000104643	ENSG00000104643	MTMR9	chr8:11283480-11328146	Control	TC32	OK	2.71904	2.66039	-0.0314602	-0.0504338	0.94745	0.998796	no
ENSG00000104660	ENSG00000104660	LEPROTL1	chr8:30095397-30183640	Control	TC32	OK	37.2946	31.9719	-0.222162	-0.355972	0.67605	0.998796	no
ENSG00000104671	ENSG00000104671	DCTN6	chr8:30095397-30183640	Control	TC32	OK	7.75866	8.89435	0.197081	0.149292	0.87995	0.998796	no
ENSG00000104679	ENSG00000104679	R3HCC1	chr8:23270119-23296279	Control	TC32	OK	12.572	9.07556	-0.470153	-0.710881	0.3057	0.998796	no
ENSG00000104687	ENSG00000104687	GSR	chr8:30678060-30727999	Control	TC32	OK	59.222	70.7489	0.256575	0.818105	0.3318	0.998796	no
ENSG00000104689	ENSG00000104689	TNFRSF10A	chr8:23189278-23230926	Control	TC32	OK	20.7406	25.5329	0.299905	0.383905	0.61805	0.998796	no
ENSG00000104691	ENSG00000104691	UBXN8	chr8:30732246-30767006	Control	TC32	OK	5.9501	7.26668	0.288384	0.440417	0.61105	0.998796	no
ENSG00000104695	ENSG00000104695	PPP2CB	chr8:30774456-30814314	Control	TC32	OK	16.9278	22.7494	0.426434	0.668093	0.357	0.998796	no
ENSG00000104714	ENSG00000104714	ERICH1	chr8:614745-1708474	Control	TC32	OK	29.147	22.5859	-0.367926	-0.688492	0.38345	0.998796	no
ENSG00000104731	ENSG00000104731	KLHDC4	chr16:87600525-87765992	Control	TC32	OK	35.4522	36.4111	0.0385047	0.0682479	0.93355	0.998796	no
ENSG00000104738	ENSG00000104738	MCM4	chr8:47960184-47978160	Control	TC32	OK	14.0554	11.741	-0.259573	-0.351125	0.68195	0.998796	no
ENSG00000104756	ENSG00000104756	KCTD9	chr8:25427846-25458476	Control	TC32	OK	9.39355	8.17096	-0.201165	-0.290233	0.68465	0.998796	no
ENSG00000104763	ENSG00000104763	ASAH1	chr8:18055991-18096394	Control	TC32	OK	657.114	415.69	-0.660633	-1.49464	0.04795	0.791576	no
ENSG00000104765	ENSG00000104765	BNIP3L	chr8:26379258-26658178	Control	TC32	OK	56.5735	45.0439	-0.328793	-0.294515	0.7087	0.998796	no
ENSG00000104774	ENSG00000104774	MAN2B1	chr19:12643274-12681902	Control	TC32	FAIL	509.725	384.421	0	0	1	1	no
ENSG00000104783	ENSG00000104783	KCNN4	chr19:43766532-43781257	Control	TC32	OK	22.1946	81.7211	1.8805	4.69636	5e-05	0.00772968	yes
ENSG00000104805	ENSG00000104805	NUCB1	chr19:48900049-48923372	Control	TC32	OK	172.79	133.625	-0.37083	-0.938129	0.2614	0.998796	no
ENSG00000104812	ENSG00000104812	GYS1	chr19:48968124-48993310	Control	TC32	OK	25.8982	20.9894	-0.303193	-0.47101	0.564	0.998796	no
ENSG00000104823	ENSG00000104823	ECH1	chr19:38815421-38852347	Control	TC32	OK	85.5901	76.1782	-0.168065	-0.234535	0.77405	0.998796	no
ENSG00000104824	ENSG00000104824	HNRNPL	chr19:38815421-38852347	Control	TC32	OK	48.1843	53.7067	0.156538	0.274415	0.73955	0.998796	no
ENSG00000104825	ENSG00000104825	NFKBIB	chr19:38878554-38908893	Control	TC32	OK	5.63918	4.24466	-0.409835	-0.563471	0.48415	0.998796	no
ENSG00000104835	ENSG00000104835	SARS2	chr19:38915265-38975910	Control	TC32	OK	11.985	15.223	0.345022	0.411824	0.6699	0.998796	no
ENSG00000104852	ENSG00000104852	SNRNP70	chr19:49085418-49108605	Control	TC32	OK	74.3589	68.7735	-0.112652	-0.230854	0.78065	0.998796	no
ENSG00000104853	ENSG00000104853	CLPTM1	chr19:44954584-44993341	Control	TC32	OK	94.7123	85.1411	-0.153696	-0.374447	0.65115	0.998796	no
ENSG00000104856	ENSG00000104856	RELB	chr19:45001429-45038198	Control	TC32	OK	6.86471	28.9449	2.07604	4.02276	5e-05	0.00772968	yes
ENSG00000104859	ENSG00000104859	CLASRP	chr19:45039039-45070956	Control	TC32	OK	54.4676	50.1498	-0.119156	-0.215017	0.8004	0.998796	no
ENSG00000104863	ENSG00000104863	LIN7B	chr19:49114323-49119140	Control	TC32	OK	4.78678	3.42931	-0.48114	-0.505252	0.5613	0.998796	no
ENSG00000104866	ENSG00000104866	PPP1R37	chr19:45071499-45305283	Control	TC32	OK	28.9402	18.8194	-0.62085	-0.587142	0.3065	0.998796	no
ENSG00000104870	ENSG00000104870	FCGRT	chr19:49506815-49526333	Control	TC32	OK	272.281	238.552	-0.190789	-0.525107	0.53005	0.998796	no
ENSG00000104872	ENSG00000104872	PIH1D1	chr19:49446297-49492308	Control	TC32	OK	36.8646	39.0824	0.0842819	0.0811356	0.9317	0.998796	no
ENSG00000104880	ENSG00000104880	ARHGEF18	chr19:7348942-7472477	Control	TC32	OK	16.6734	9.94334	-0.745749	-1.28187	0.0519	0.813921	no
ENSG00000104884	ENSG00000104884	ERCC2	chr19:45333433-45370918	Control	TC32	OK	2.74979	3.58983	0.384595	0.564325	0.48415	0.998796	no
ENSG00000104885	ENSG00000104885	DOT1L	chr19:2100987-2248679	Control	TC32	OK	22.4766	27.4821	0.290069	0.24732	0.64525	0.998796	no
ENSG00000104886	ENSG00000104886	PLEKHJ1	chr19:2100987-2248679	Control	TC32	OK	18.9945	20.1418	0.0846154	0.0608971	0.93185	0.998796	no
ENSG00000104889	ENSG00000104889	RNASEH2A	chr19:12763002-12874951	Control	TC32	OK	6.10523	4.68646	-0.381548	-0.184484	0.74675	0.998796	no
ENSG00000104894	ENSG00000104894	CD37	chr19:49331616-49388081	Control	TC32	OK	157	88.335	-0.829704	-2.06377	0.0148	0.430003	no
ENSG00000104897	ENSG00000104897	SF3A2	chr19:2100987-2248679	Control	TC32	OK	31.7854	33.7548	0.0867302	0.0607962	0.93215	0.998796	no
ENSG00000104903	ENSG00000104903	LYL1	chr19:13099032-13103161	Control	TC32	OK	25.0819	14.2627	-0.814398	-2.08533	0.01545	0.441348	no
ENSG00000104904	ENSG00000104904	OAZ1	chr19:2252251-2354806	Control	TC32	OK	576.906	562.97	-0.0352782	-0.0992221	0.9097	0.998796	no
ENSG00000104907	ENSG00000104907	TRMT1	chr19:13104901-13117567	Control	TC32	OK	26.0007	31.2408	0.26488	0.488616	0.5532	0.998796	no
ENSG00000104915	ENSG00000104915	STX10	chr19:13144057-13150383	Control	TC32	OK	57.6356	26.0476	-1.14581	-1.81399	0.0266	0.613711	no
ENSG00000104921	ENSG00000104921	FCER2	chr19:7688757-7702146	Control	TC32	OK	633.501	607.905	-0.0595015	-0.182703	0.83035	0.998796	no
ENSG00000104946	ENSG00000104946	TBC1D17	chr19:49818278-49888749	Control	TC32	OK	13.988	21.3486	0.609956	0.674671	0.43435	0.998796	no
ENSG00000104951	ENSG00000104951	IL4I1	chr19:49889653-49961172	Control	TC32	OK	17.3777	61.471	1.82267	1.71359	0.03065	0.653919	no
ENSG00000104957	ENSG00000104957	CCDC130	chr19:13731759-13763296	Control	TC32	OK	26.796	23.6171	-0.182184	-0.40261	0.6414	0.998796	no
ENSG00000104960	ENSG00000104960	PTOV1	chr19:49818278-49888749	Control	TC32	OK	22.0632	20.2175	-0.126044	-0.104931	0.8788	0.998796	no
ENSG00000104964	ENSG00000104964	AES	chr19:3052909-3063107	Control	TC32	OK	145.302	105.643	-0.459865	-1.17935	0.1341	0.998796	no
ENSG00000104969	ENSG00000104969	SGTA	chr19:2754713-2783371	Control	TC32	OK	17.0484	16.9949	-0.00453657	-0.0111276	0.98875	0.998796	no
ENSG00000104972	ENSG00000104972	LILRB1	chr19:54617157-54638892	Control	TC32	OK	21.3014	39.7713	0.900781	1.8769	0.014	0.417674	no
ENSG00000104973	ENSG00000104973	MED25	chr19:49818278-49888749	Control	TC32	OK	30.0452	28.0475	-0.0992642	-0.10337	0.88775	0.998796	no
ENSG00000104974	ENSG00000104974	LILRA1	chr19:54593581-54602090	Control	TC32	OK	3.4359	7.06767	1.04055	2.24105	0.01285	0.395192	no
ENSG00000104976	ENSG00000104976	SNAPC2	chr19:7920315-7923250	Control	TC32	OK	18.0815	10.5768	-0.773604	-1.74604	0.03345	0.684848	no
ENSG00000104979	ENSG00000104979	C19orf53	chr19:13764531-13778462	Control	TC32	OK	67.1687	73.0663	0.121416	0.262489	0.7579	0.998796	no
ENSG00000104980	ENSG00000104980	TIMM44	chr19:7924484-7943920	Control	TC32	OK	33.8591	36.2461	0.0982792	0.247603	0.76825	0.998796	no
ENSG00000104983	ENSG00000104983	CCDC61	chr19:45995460-46023065	Control	TC32	OK	6.96857	5.14152	-0.438668	-0.557737	0.48	0.998796	no
ENSG00000104998	ENSG00000104998	IL27RA	chr19:14031747-14053216	Control	TC32	OK	43.7356	54.2812	0.311643	1.00447	0.23375	0.998796	no
ENSG00000105048	ENSG00000105048	TNNT1	chr19:55132793-55149354	Control	TC32	OK	3.67669	5.0393	0.454814	0.643614	0.435	0.998796	no
ENSG00000105053	ENSG00000105053	VRK3	chr19:49976466-50066793	Control	TC32	OK	20.6295	18.9919	-0.119327	-0.209353	0.78655	0.998796	no
[truncated: 13,832 more rows]

## Sheet: cuffdiff.TC71
test_id	gene_id	gene	locus	sample_1	sample_2	status	value_1	value_2	log2(fold_change)	test_stat	p_value	q_value	significant
ENSG00000000419	ENSG00000000419	DPM1	chr20:50888915-50958555	Control	TC71	OK	20.1196	17.5404	-0.197926	-0.168943	0.857	0.997725	no
ENSG00000000457	ENSG00000000457	SCYL3	chr1:169662006-169894267	Control	TC71	OK	4.04407	3.72359	-0.119115	-0.192681	0.8186	0.997725	no
ENSG00000000460	ENSG00000000460	C1orf112	chr1:169662006-169894267	Control	TC71	OK	2.95461	4.08529	0.46747	0.451886	0.5408	0.997725	no
ENSG00000000938	ENSG00000000938	FGR	chr1:27612063-27635277	Control	TC71	OK	517.963	416.224	-0.315489	-0.827988	0.3124	0.997725	no
ENSG00000001036	ENSG00000001036	FUCA2	chr6:143450806-143511690	Control	TC71	OK	33.8673	35.3567	0.062089	0.162312	0.83805	0.997725	no
ENSG00000001084	ENSG00000001084	GCLC	chr6:53497340-53617171	Control	TC71	OK	67.5826	62.4979	-0.112842	-0.21686	0.7895	0.997725	no
ENSG00000001167	ENSG00000001167	NFYA	chr6:41026910-41099976	Control	TC71	OK	15.0749	13.9153	-0.115468	-0.2484	0.7673	0.997725	no
ENSG00000001461	ENSG00000001461	NIPAL3	chr1:24307555-24472976	Control	TC71	OK	4.89439	4.18114	-0.227231	-0.405158	0.6222	0.997725	no
ENSG00000001497	ENSG00000001497	LAS1L	chrX:65512581-65534775	Control	TC71	OK	10.8869	8.08809	-0.428727	-0.683677	0.33815	0.997725	no
ENSG00000001629	ENSG00000001629	ANKIB1	chr7:92246233-92401384	Control	TC71	OK	31.2852	33.5511	0.100878	0.165939	0.84465	0.997725	no
ENSG00000001630	ENSG00000001630	CYP51A1	chr7:92112150-92180725	Control	TC71	OK	36.8663	45.6451	0.308157	0.896035	0.25165	0.997725	no
ENSG00000001631	ENSG00000001631	KRIT1	chr7:92198968-92246166	Control	TC71	OK	26.2192	27.5559	0.0717412	0.123209	0.88965	0.997725	no
ENSG00000002016	ENSG00000002016	RAD52	chr12:912076-1495933	Control	TC71	OK	13.3888	11.411	-0.230592	-0.154827	0.8362	0.997725	no
ENSG00000002330	ENSG00000002330	BAD	chr11:64269829-64289500	Control	TC71	OK	13.4947	6.80736	-0.987226	-0.845769	0.261	0.997725	no
ENSG00000002549	ENSG00000002549	LAP3	chr4:17577191-17614571	Control	TC71	OK	44.9149	40.7509	-0.140361	-0.321571	0.7041	0.997725	no
ENSG00000002586	ENSG00000002586	CD99	chrX:2691132-2741309	Control	TC71	OK	87.5554	77.3671	-0.178477	-0.459663	0.5884	0.997725	no
ENSG00000002822	ENSG00000002822	MAD1L1	chr7:1815792-2233243	Control	TC71	OK	52.9581	37.2348	-0.508202	-0.97476	0.2651	0.997725	no
ENSG00000002834	ENSG00000002834	LASP1	chr17:38869858-38921770	Control	TC71	OK	203.915	172.353	-0.242601	-0.68469	0.376	0.997725	no
ENSG00000002919	ENSG00000002919	SNX11	chr17:48103356-48123074	Control	TC71	OK	17.9823	15.9832	-0.170021	-0.257261	0.74865	0.997725	no
ENSG00000002933	ENSG00000002933	TMEM176A	chr7:150791284-150805120	Control	TC71	OK	2.30632	4.55155	0.980763	1.05025	0.23685	0.997725	no
ENSG00000003056	ENSG00000003056	M6PR	chr12:8681599-8949955	Control	TC71	OK	496.253	407.99	-0.282542	-0.636511	0.45245	0.997725	no
ENSG00000003147	ENSG00000003147	ICA1	chr7:8113183-8344516	Control	TC71	OK	1.46708	4.32966	1.56131	0.93195	0.17655	0.997725	no
ENSG00000003393	ENSG00000003393	ALS2	chr2:201700553-201781189	Control	TC71	OK	11.1441	11.137	-0.000920772	-0.00137086	0.9986	0.999494	no
ENSG00000003400	ENSG00000003400	CASP10	chr2:201182880-201229406	Control	TC71	OK	20.8358	15.7859	-0.400427	-0.554595	0.496	0.997725	no
ENSG00000003402	ENSG00000003402	CFLAR	chr2:201116103-201176687	Control	TC71	OK	155.324	178.147	0.197785	0.310712	0.72105	0.997725	no
ENSG00000003436	ENSG00000003436	TFPI	chr2:187001875-187565760	Control	TC71	OK	3.87582	9.9964	1.36691	1.21285	0.1028	0.997725	no
ENSG00000003509	ENSG00000003509	NDUFAF7	chr2:37167819-37324808	Control	TC71	OK	13.5897	15.0227	0.144621	0.104244	0.89355	0.997725	no
ENSG00000003756	ENSG00000003756	RBM5	chr3:49940006-50189075	Control	TC71	OK	116.351	93.6267	-0.313491	-0.464307	0.5662	0.997725	no
ENSG00000004059	ENSG00000004059	ARF5	chr7:127580617-127602144	Control	TC71	OK	56.449	44.4706	-0.344094	-0.552827	0.5088	0.997725	no
ENSG00000004142	ENSG00000004142	POLDIP2	chr17:28347176-28357522	Control	TC71	OK	20.9109	23.3295	0.1579	0.456176	0.58585	0.997725	no
ENSG00000004399	ENSG00000004399	PLXND1	chr3:129555174-129606818	Control	TC71	OK	368.714	306.209	-0.267984	-0.468359	0.59365	0.997725	no
ENSG00000004455	ENSG00000004455	AK2	chr1:32986951-33080996	Control	TC71	OK	32.0538	32.5952	0.0241642	0.022551	0.9606	0.997725	no
ENSG00000004478	ENSG00000004478	FKBP4	chr12:1946053-2941140	Control	TC71	OK	18.499	17.99	-0.0402494	-0.0358094	0.94215	0.997725	no
ENSG00000004487	ENSG00000004487	KDM1A	chr1:23019442-23177808	Control	TC71	OK	20.4663	18.7976	-0.1227	-0.157462	0.835	0.997725	no
ENSG00000004534	ENSG00000004534	RBM6	chr3:49940006-50189075	Control	TC71	OK	55.9879	52.0684	-0.104706	-0.158494	0.81955	0.997725	no
ENSG00000004660	ENSG00000004660	CAMKK1	chr17:3860314-3894891	Control	TC71	OK	15.3922	10.1592	-0.599414	-1.70363	0.04565	0.997725	no
ENSG00000004700	ENSG00000004700	RECQL	chr12:21437614-21501669	Control	TC71	OK	17.95	19.1825	0.0958116	0.165985	0.82815	0.997725	no
ENSG00000004766	ENSG00000004766	VPS50	chr7:93232339-93361121	Control	TC71	OK	19.6185	22.2812	0.183608	0.306648	0.70605	0.997725	no
ENSG00000004779	ENSG00000004779	NDUFAB1	chr16:23581001-23596356	Control	TC71	OK	18.5489	19.9718	0.106626	0.232115	0.78305	0.997725	no
ENSG00000004799	ENSG00000004799	PDK4	chr7:95583498-95596491	Control	TC71	OK	10.6301	8.12915	-0.386983	-0.596588	0.37485	0.997725	no
ENSG00000004809	ENSG00000004809	SLC22A16	chr6:110424686-110476641	Control	TC71	OK	19.6876	15.8807	-0.310013	-0.55726	0.51855	0.997725	no
ENSG00000004864	ENSG00000004864	SLC25A13	chr7:96120219-96322147	Control	TC71	OK	36.657	32.2686	-0.183959	-0.287381	0.6896	0.997725	no
ENSG00000004866	ENSG00000004866	ST7	chr7:116952445-117230103	Control	TC71	OK	13.4226	11.5418	-0.217797	-0.34739	0.634	0.997725	no
ENSG00000004897	ENSG00000004897	CDC27	chr17:47117702-47189422	Control	TC71	OK	13.7884	20.4845	0.571076	0.764505	0.34285	0.997725	no
ENSG00000004961	ENSG00000004961	HCCS	chrX:11111300-11123078	Control	TC71	OK	14.9079	17.7735	0.253652	0.587636	0.49135	0.997725	no
ENSG00000004975	ENSG00000004975	DVL2	chr17:7225340-7234545	Control	TC71	OK	35.7384	27.1159	-0.398335	-0.756586	0.374	0.997725	no
ENSG00000005007	ENSG00000005007	UPF1	chr19:18831937-18868236	Control	TC71	OK	40.1174	33.13	-0.276091	-0.433468	0.5918	0.997725	no
ENSG00000005020	ENSG00000005020	SKAP2	chr7:26667061-26995239	Control	TC71	OK	73.6136	63.169	-0.220755	-0.352765	0.6683	0.997725	no
ENSG00000005022	ENSG00000005022	SLC25A5	chrX:119466033-119471319	Control	TC71	OK	212.223	192.309	-0.142157	-0.368811	0.6535	0.997725	no
ENSG00000005059	ENSG00000005059	MCUB	chr4:109560204-109703583	Control	TC71	OK	8.59594	5.91461	-0.539373	-0.849803	0.305	0.997725	no
ENSG00000005075	ENSG00000005075	POLR2J	chr7:102464928-102478907	Control	TC71	OK	23.5405	23.9754	0.0264093	0.0578977	0.9467	0.997725	no
ENSG00000005100	ENSG00000005100	DHX33	chr17:5282264-5469060	Control	TC71	OK	6.01745	5.50116	-0.129417	-0.128264	0.88245	0.997725	no
ENSG00000005156	ENSG00000005156	LIG3	chr17:34927858-35121522	Control	TC71	OK	30.9069	31.1053	0.00923294	0.0104476	0.98845	0.997725	no
ENSG00000005175	ENSG00000005175	RPAP3	chr12:47661248-47706061	Control	TC71	OK	11.3525	11.2727	-0.0101777	-0.0186065	0.9801	0.997725	no
ENSG00000005194	ENSG00000005194	CIAPIN1	chr16:57428168-57487327	Control	TC71	OK	12.2367	10.2683	-0.253015	-0.275775	0.69945	0.997725	no
ENSG00000005206	ENSG00000005206	SPPL2B	chr19:2252251-2354806	Control	TC71	OK	20.7247	13.424	-0.626532	-0.297966	0.4636	0.997725	no
ENSG00000005238	ENSG00000005238	FAM214B	chr9:35104111-35116341	Control	TC71	OK	24.7191	20.3582	-0.280016	-0.486436	0.53665	0.997725	no
ENSG00000005243	ENSG00000005243	COPZ2	chr17:48026166-48038030	Control	TC71	OK	3.39736	2.26529	-0.584719	-0.53289	0.5462	0.997725	no
ENSG00000005302	ENSG00000005302	MSL3	chrX:11758158-11775753	Control	TC71	OK	16.7456	15.9932	-0.0663205	-0.117552	0.88025	0.997725	no
ENSG00000005339	ENSG00000005339	CREBBP	chr16:3725053-3880726	Control	TC71	OK	75.6842	79.606	0.0728843	0.0878107	0.9106	0.997725	no
ENSG00000005379	ENSG00000005379	TSPOAP1	chr17:58301227-58417595	Control	TC71	OK	3.27413	2.04389	-0.679797	-0.263267	0.50675	0.997725	no
ENSG00000005436	ENSG00000005436	GCFC2	chr2:75646782-75710989	Control	TC71	OK	8.9231	8.72227	-0.0328418	-0.0308112	0.97055	0.997725	no
ENSG00000005469	ENSG00000005469	CROT	chr7:87345680-87399795	Control	TC71	OK	2.1163	2.89071	0.449884	0.514629	0.4974	0.997725	no
ENSG00000005483	ENSG00000005483	KMT2E	chr7:105013424-105399308	Control	TC71	OK	46.6954	50.2412	0.105591	0.133931	0.8358	0.997725	no
ENSG00000005486	ENSG00000005486	RHBDD2	chr7:75842601-75888926	Control	TC71	OK	39.0815	26.769	-0.545921	-1.38784	0.08585	0.997725	no
ENSG00000005700	ENSG00000005700	IBTK	chr6:82169982-82247754	Control	TC71	OK	10.938	13.9515	0.351068	0.930986	0.26915	0.997725	no
ENSG00000005801	ENSG00000005801	ZNF195	chr11:3336720-3379222	Control	TC71	OK	18.6648	15.6387	-0.255199	-0.437491	0.58595	0.997725	no
ENSG00000005810	ENSG00000005810	MYCBP2	chr13:76990659-77327050	Control	TC71	OK	44.828	31.508	-0.508682	-0.426189	0.44365	0.997725	no
ENSG00000005812	ENSG00000005812	FBXL3	chr13:76990659-77327050	Control	TC71	OK	28.7281	26.1281	-0.13686	-0.111178	0.8396	0.997725	no
ENSG00000005844	ENSG00000005844	ITGAL	chr16:30472657-30523185	Control	TC71	OK	183.281	168.639	-0.120118	-0.195277	0.8078	0.997725	no
ENSG00000005882	ENSG00000005882	PDK2	chr17:50094736-50129882	Control	TC71	OK	4.81242	3.20072	-0.588367	-0.630345	0.48755	0.997725	no
ENSG00000005884	ENSG00000005884	ITGA3	chr17:50055967-50090481	Control	TC71	OK	81.7716	25.9866	-1.65383	-2.26825	0.0046	0.432951	no
ENSG00000005889	ENSG00000005889	ZFX	chrX:24146224-24216255	Control	TC71	OK	18.6542	20.2184	0.11617	0.147575	0.80325	0.997725	no
ENSG00000005893	ENSG00000005893	LAMP2	chrX:120427826-120469365	Control	TC71	OK	113.617	122.452	0.10804	0.303267	0.7185	0.997725	no
ENSG00000006007	ENSG00000006007	GDE1	chr16:19501688-19522145	Control	TC71	OK	33.6707	33.9943	0.0137978	0.030931	0.97035	0.997725	no
ENSG00000006015	ENSG00000006015	REX1BD	chr19:18571729-18621039	Control	TC71	OK	37.7481	24.4835	-0.624593	-0.451279	0.6483	0.997725	no
ENSG00000006016	ENSG00000006016	CRLF1	chr19:18571729-18621039	Control	TC71	OK	4.04115	3.46651	-0.22128	-0.0824796	0.919	0.997725	no
ENSG00000006025	ENSG00000006025	OSBPL7	chr17:47807371-47821834	Control	TC71	OK	5.81298	2.52561	-1.20264	-1.49368	0.0573	0.997725	no
ENSG00000006062	ENSG00000006062	MAP3K14	chr17:45190930-45317040	Control	TC71	OK	9.96266	9.01762	-0.143784	-0.115098	0.84005	0.997725	no
ENSG00000006118	ENSG00000006118	TMEM132A	chr11:60913165-60952530	Control	TC71	OK	15.2296	9.62338	-0.662265	-0.402743	0.5535	0.997725	no
ENSG00000006125	ENSG00000006125	AP2B1	chr17:35568108-35868891	Control	TC71	OK	22.7551	20.1469	-0.175629	-0.362758	0.5597	0.997725	no
ENSG00000006194	ENSG00000006194	ZNF263	chr16:3263742-3318852	Control	TC71	OK	18.9903	16.7099	-0.184561	-0.346926	0.6793	0.997725	no
ENSG00000006282	ENSG00000006282	SPATA20	chr17:50532542-50555852	Control	TC71	OK	55.2302	46.1473	-0.259211	-0.50589	0.5578	0.997725	no
ENSG00000006327	ENSG00000006327	TNFRSF12A	chr16:3014711-3022383	Control	TC71	OK	7.28362	8.34985	0.197094	0.369395	0.6579	0.997725	no
ENSG00000006451	ENSG00000006451	RALA	chr7:39623482-39708124	Control	TC71	OK	15.7273	20.3107	0.368974	0.803	0.3317	0.997725	no
ENSG00000006453	ENSG00000006453	BAIAP2L1	chr7:98252378-98401068	Control	TC71	OK	15.0251	11.5504	-0.379436	-0.214849	0.7679	0.997725	no
ENSG00000006459	ENSG00000006459	KDM7A	chr7:140084745-140177035	Control	TC71	OK	20.5744	22.5657	0.133283	0.175686	0.827	0.997725	no
ENSG00000006530	ENSG00000006530	AGK	chr7:141529202-141702153	Control	TC71	OK	4.68218	5.19524	0.150011	0.130146	0.8561	0.997725	no
ENSG00000006534	ENSG00000006534	ALDH3B1	chr11:68008577-68030461	Control	TC71	OK	39.9217	29.3965	-0.441528	-1.25678	0.11165	0.997725	no
ENSG00000006576	ENSG00000006576	PHTF2	chr7:77798791-77957503	Control	TC71	OK	14.843	9.83119	-0.59434	-0.593097	0.38555	0.997725	no
ENSG00000006606	ENSG00000006606	CCL26	chr7:75769532-75789896	Control	TC71	OK	9.62198	4.10013	-1.23066	-1.72481	0.04825	0.997725	no
ENSG00000006607	ENSG00000006607	FARP2	chr2:241356242-241509730	Control	TC71	OK	11.3083	11.0261	-0.0364578	-0.0341306	0.9504	0.997725	no
ENSG00000006625	ENSG00000006625	GGCT	chr7:30496620-30634033	Control	TC71	OK	47.0489	54.6995	0.217365	0.242255	0.77255	0.997725	no
ENSG00000006634	ENSG00000006634	DBF4	chr7:87833567-87909541	Control	TC71	OK	5.02095	8.74632	0.800716	0.712489	0.2949	0.997725	no
ENSG00000006652	ENSG00000006652	IFRD1	chr7:112422967-112491062	Control	TC71	OK	24.5543	26.9698	0.135367	0.246251	0.75015	0.997725	no
ENSG00000006695	ENSG00000006695	COX10	chr17:14069495-14208677	Control	TC71	OK	10.517	10.5089	-0.00111229	-0.00224898	0.9968	0.999033	no
ENSG00000006704	ENSG00000006704	GTF2IRD1	chr7:74453789-74602604	Control	TC71	OK	12.5716	9.30236	-0.434496	-0.537276	0.52985	0.997725	no
ENSG00000006712	ENSG00000006712	PAF1	chr19:39385851-39391195	Control	TC71	OK	20.3952	18.8059	-0.117047	-0.187479	0.7804	0.997725	no
ENSG00000006715	ENSG00000006715	VPS41	chr7:38722962-38932394	Control	TC71	OK	63.0734	65.9077	0.0634173	0.0869508	0.9191	0.997725	no
ENSG00000006744	ENSG00000006744	ELAC2	chr17:12992390-13018187	Control	TC71	OK	29.0539	26.4305	-0.136531	-0.259435	0.7576	0.997725	no
ENSG00000006756	ENSG00000006756	ARSD	chrX:2903969-2929351	Control	TC71	OK	10.1576	8.22719	-0.304081	-0.539166	0.43235	0.997725	no
ENSG00000006757	ENSG00000006757	PNPLA4	chrX:7898246-7927739	Control	TC71	OK	4.84227	3.69364	-0.39064	-0.501782	0.5673	0.997725	no
ENSG00000006831	ENSG00000006831	ADIPOR2	chr12:1688573-1788678	Control	TC71	OK	12.7251	11.7024	-0.12087	-0.238941	0.72975	0.997725	no
ENSG00000007038	ENSG00000007038	PRSS21	chr16:2817179-2826304	Control	TC71	OK	17.1107	8.5696	-0.997596	-1.90423	0.0257	0.997725	no
ENSG00000007047	ENSG00000007047	MARK4	chr19:45071499-45305283	Control	TC71	OK	5.36796	3.31776	-0.694164	-0.548525	0.4386	0.997725	no
ENSG00000007080	ENSG00000007080	CCDC124	chr19:17933015-17943991	Control	TC71	OK	37.607	34.1662	-0.138428	-0.336528	0.6956	0.997725	no
ENSG00000007168	ENSG00000007168	PAFAH1B1	chr17:2593209-2685615	Control	TC71	OK	54.6066	55.1243	0.0136123	0.0200217	0.97885	0.997725	no
ENSG00000007202	ENSG00000007202	KIAA0100	chr17:28455751-28645454	Control	TC71	OK	215.517	164.313	-0.39135	-0.458442	0.4852	0.997725	no
ENSG00000007237	ENSG00000007237	GAS7	chr17:9910608-10198551	Control	TC71	OK	74.2627	40.5442	-0.873145	-1.39967	0.0444	0.997725	no
ENSG00000007255	ENSG00000007255	TRAPPC6A	chr19:45071499-45305283	Control	TC71	OK	13.7835	10.8093	-0.350668	-0.287469	0.72505	0.997725	no
ENSG00000007264	ENSG00000007264	MATK	chr19:3777969-3802129	Control	TC71	OK	96.2291	53.7737	-0.839573	-2.12482	0.0119	0.694955	no
ENSG00000007341	ENSG00000007341	ST7L	chr1:112466540-112671619	Control	TC71	OK	7.70118	12.0898	0.650641	0.346878	0.4272	0.997725	no
ENSG00000007376	ENSG00000007376	RPUSD1	chr16:784973-800737	Control	TC71	OK	8.78109	6.13137	-0.518191	-0.861353	0.29855	0.997725	no
ENSG00000007392	ENSG00000007392	LUC7L	chr16:188968-229463	Control	TC71	OK	28.151	29.6175	0.0732596	0.123992	0.87845	0.997725	no
ENSG00000007520	ENSG00000007520	TSR3	chr16:1333600-1351911	Control	TC71	OK	21.8075	14.4054	-0.598208	-1.19628	0.1568	0.997725	no
ENSG00000007541	ENSG00000007541	PIGQ	chr16:566994-584136	Control	TC71	OK	24.984	13.7953	-0.85683	-1.74088	0.0269	0.997725	no
ENSG00000007545	ENSG00000007545	CRAMP1	chr16:1612324-1702280	Control	TC71	OK	6.99022	5.61172	-0.316896	-0.304031	0.5396	0.997725	no
ENSG00000007923	ENSG00000007923	DNAJC11	chr1:6624865-6701924	Control	TC71	OK	24.5854	31.3486	0.350596	0.427512	0.56145	0.997725	no
ENSG00000007944	ENSG00000007944	MYLIP	chr6:16129124-16148248	Control	TC71	OK	3.23659	3.24743	0.00482222	0.00916069	0.99045	0.997725	no
ENSG00000008018	ENSG00000008018	PSMB1	chr6:170535116-170553341	Control	TC71	OK	41.0569	54.5551	0.41009	1.12667	0.1843	0.997725	no
ENSG00000008083	ENSG00000008083	JARID2	chr6:15246295-15522040	Control	TC71	OK	19.6486	14.9856	-0.390856	-0.748312	0.238	0.997725	no
ENSG00000008128	ENSG00000008128	CDK11A	chr1:1702729-1745999	Control	TC71	OK	38.173	32.7607	-0.220586	-0.296455	0.73245	0.997725	no
ENSG00000008130	ENSG00000008130	NADK	chr1:1751231-1780457	Control	TC71	OK	82.6721	68.4475	-0.272402	-0.501364	0.54905	0.997725	no
ENSG00000008256	ENSG00000008256	CYTH3	chr7:6161775-6272644	Control	TC71	OK	4.75127	4.57282	-0.055227	-0.0550829	0.94815	0.997725	no
ENSG00000008282	ENSG00000008282	SYPL1	chr7:106090502-106112576	Control	TC71	OK	30.7134	36.604	0.253133	0.487131	0.5472	0.997725	no
ENSG00000008283	ENSG00000008283	CYB561	chr17:63432303-63446378	Control	TC71	OK	5.5682	3.55898	-0.645749	-1.12677	0.10165	0.997725	no
ENSG00000008294	ENSG00000008294	SPAG9	chr17:50962173-51120865	Control	TC71	OK	109.366	105.953	-0.0457455	-0.0842232	0.91765	0.997725	no
ENSG00000008324	ENSG00000008324	SS18L2	chr3:42547968-42665854	Control	TC71	FAIL	9.78756	11.8713	0	0	1	1	no
ENSG00000008382	ENSG00000008382	MPND	chr19:4343526-4360086	Control	TC71	OK	37.1046	25.9011	-0.518584	-0.799807	0.33415	0.997725	no
ENSG00000008394	ENSG00000008394	MGST1	chr12:16347141-16610594	Control	TC71	OK	82.1082	108.675	0.404418	0.719526	0.3786	0.997725	no
ENSG00000008405	ENSG00000008405	CRY1	chr12:106991363-107123314	Control	TC71	OK	6.43066	4.79165	-0.424444	-0.694735	0.36885	0.997725	no
ENSG00000008441	ENSG00000008441	NFIX	chr19:12995607-13098796	Control	TC71	OK	3.03909	3.25687	0.099846	0.110351	0.82865	0.997725	no
ENSG00000008513	ENSG00000008513	ST3GAL1	chr8:133454847-133571940	Control	TC71	OK	29.2508	28.7039	-0.0272287	-0.0395651	0.9416	0.997725	no
ENSG00000008517	ENSG00000008517	IL32	chr16:3065296-3087100	Control	TC71	OK	3.51664	4.99028	0.504922	0.43218	0.60855	0.997725	no
ENSG00000008710	ENSG00000008710	PKD1	chr16:2039814-2135898	Control	TC71	OK	20.788	15.408	-0.432073	-0.378938	0.48055	0.997725	no
ENSG00000008838	ENSG00000008838	MED24	chr17:40019096-40100725	Control	TC71	OK	56.3862	52.5052	-0.102882	-0.163266	0.87175	0.997725	no
ENSG00000008853	ENSG00000008853	RHOBTB2	chr8:22687658-23083619	Control	TC71	OK	21.9683	8.21307	-1.41943	-1.15434	0.0461	0.997725	no
ENSG00000008869	ENSG00000008869	HEATR5B	chr2:36968382-37084342	Control	TC71	OK	12.0053	9.91945	-0.275343	-0.450578	0.4915	0.997725	no
ENSG00000008952	ENSG00000008952	SEC62	chr3:169939352-169998373	Control	TC71	OK	50.3758	56.927	0.176381	0.368874	0.6578	0.997725	no
ENSG00000008988	ENSG00000008988	RPS20	chr8:56067294-56074581	Control	TC71	OK	389.274	466.706	0.261729	0.809668	0.3514	0.997725	no
ENSG00000009307	ENSG00000009307	CSDE1	chr1:114716912-114758676	Control	TC71	OK	368.855	372.261	0.0132594	0.0228185	0.9781	0.997725	no
ENSG00000009335	ENSG00000009335	UBE3C	chr7:157138912-157269372	Control	TC71	OK	70.8356	70.415	-0.0085923	-0.0145221	0.9861	0.997725	no
ENSG00000009413	ENSG00000009413	REV3L	chr6:111299027-111606278	Control	TC71	OK	9.71714	13.9336	0.519969	0.443751	0.20965	0.997725	no
ENSG00000009780	ENSG00000009780	FAM76A	chr1:27725978-27763122	Control	TC71	OK	9.47235	7.73193	-0.292893	-0.366379	0.6355	0.997725	no
ENSG00000009790	ENSG00000009790	TRAF3IP3	chr1:209756031-209784559	Control	TC71	OK	3.09579	9.53248	1.62254	2.08974	0.0127	0.718588	no
ENSG00000009830	ENSG00000009830	POMT2	chr14:77274955-77331597	Control	TC71	OK	15.0532	17.1475	0.187935	0.202396	0.80645	0.997725	no
ENSG00000009844	ENSG00000009844	VTA1	chr6:142147161-142224689	Control	TC71	OK	19.921	21.3106	0.0972794	0.148426	0.84985	0.997725	no
ENSG00000009950	ENSG00000009950	MLXIPL	chr7:73593193-73624543	Control	TC71	OK	4.68521	4.51742	-0.0526141	-0.0898615	0.9104	0.997725	no
ENSG00000009954	ENSG00000009954	BAZ1B	chr7:73440397-73522278	Control	TC71	OK	28.5234	28.9034	0.0190935	0.0475713	0.94855	0.997725	no
ENSG00000010017	ENSG00000010017	RANBP9	chr6:13615326-13711564	Control	TC71	OK	25.8706	21.0111	-0.300162	-0.520207	0.5306	0.997725	no
ENSG00000010072	ENSG00000010072	SPRTN	chr1:231332752-231355023	Control	TC71	OK	9.19872	8.0744	-0.188078	-0.162919	0.8466	0.997725	no
ENSG00000010165	ENSG00000010165	METTL13	chr1:171781663-171814023	Control	TC71	OK	17.3591	18.5115	0.0927244	0.169149	0.84315	0.997725	no
ENSG00000010219	ENSG00000010219	DYRK4	chr12:4562203-4851927	Control	TC71	OK	53.5724	39.6525	-0.434081	-0.591397	0.51405	0.997725	no
ENSG00000010244	ENSG00000010244	ZNF207	chr17:32266175-32381886	Control	TC71	OK	146.742	125.424	-0.226461	-0.296552	0.7135	0.997725	no
ENSG00000010256	ENSG00000010256	UQCRC1	chr3:48599001-48610976	Control	TC71	OK	167.028	177.537	0.0880231	0.232556	0.7779	0.997725	no
ENSG00000010270	ENSG00000010270	STARD3NL	chr7:38178221-38230671	Control	TC71	OK	11.247	14.3899	0.355506	0.790525	0.354	0.997725	no
ENSG00000010278	ENSG00000010278	CD9	chr12:6199714-6238271	Control	TC71	OK	215.518	221.275	0.0380297	0.0897429	0.91735	0.997725	no
ENSG00000010292	ENSG00000010292	NCAPD2	chr12:6491885-6531955	Control	TC71	OK	19.1516	18.1101	-0.0806674	-0.0503607	0.9311	0.997725	no
ENSG00000010295	ENSG00000010295	IFFO1	chr12:6538374-6556083	Control	TC71	OK	25.5214	16.6442	-0.61669	-1.72807	0.043	0.997725	no
ENSG00000010318	ENSG00000010318	PHF7	chr3:52410656-52423641	Control	TC71	OK	10.1132	10.7525	0.0884313	0.149926	0.84505	0.997725	no
ENSG00000010319	ENSG00000010319	SEMA3G	chr3:52433052-52445085	Control	TC71	OK	8.32084	2.48484	-1.74358	-2.90002	0.0014	0.205637	no
ENSG00000010322	ENSG00000010322	NISCH	chr3:52455117-52493071	Control	TC71	OK	31.1965	21.6651	-0.526014	-0.93729	0.21985	0.997725	no
ENSG00000010327	ENSG00000010327	STAB1	chr3:52495337-52770949	Control	TC71	OK	3.03684	5.80958	0.935863	0.263335	0.3036	0.997725	no
ENSG00000010361	ENSG00000010361	FUZ	chr19:49766967-49817376	Control	TC71	OK	5.68492	6.05045	0.0899042	0.0550676	0.9399	0.997725	no
ENSG00000010404	ENSG00000010404	IDS	chrX:149476989-149550510	Control	TC71	OK	19.6968	20.8773	0.0839732	0.134823	0.8652	0.997725	no
ENSG00000010539	ENSG00000010539	ZNF200	chr16:3188211-3236221	Control	TC71	OK	8.10528	6.59857	-0.29671	-0.578412	0.47075	0.997725	no
ENSG00000010610	ENSG00000010610	CD4	chr12:6786857-6820808	Control	TC71	OK	20.0043	17.2094	-0.21711	-0.500664	0.52905	0.997725	no
ENSG00000010626	ENSG00000010626	LRRC23	chr12:6867118-6923698	Control	TC71	OK	11.5418	7.64172	-0.594895	-0.32598	0.60755	0.997725	no
ENSG00000010671	ENSG00000010671	BTK	chrX:101349446-101390796	Control	TC71	OK	74.454	72.1622	-0.0451054	-0.0654797	0.9425	0.997725	no
ENSG00000010704	ENSG00000010704	HFE	chr6:26087280-26098343	Control	TC71	OK	3.1076	2.1865	-0.507178	-0.61355	0.4697	0.997725	no
ENSG00000010803	ENSG00000010803	SCMH1	chr1:41014589-41242154	Control	TC71	OK	4.34046	2.96647	-0.549099	-0.612301	0.423	0.997725	no
ENSG00000010810	ENSG00000010810	FYN	chr6:111660331-111873452	Control	TC71	OK	28.3002	20.3169	-0.478132	-0.904905	0.29555	0.997725	no
ENSG00000010818	ENSG00000010818	HIVEP2	chr6:142748442-142956698	Control	TC71	OK	3.99573	4.79572	0.263291	0.209122	0.50955	0.997725	no
ENSG00000011007	ENSG00000011007	ELOA	chr1:23743154-23778287	Control	TC71	OK	22.8137	20.9768	-0.121102	-0.318537	0.6831	0.997725	no
ENSG00000011009	ENSG00000011009	LYPLA2	chr1:23790969-23795539	Control	TC71	OK	15.7897	9.5925	-0.719001	-1.51496	0.06615	0.997725	no
ENSG00000011021	ENSG00000011021	CLCN6	chr1:11761786-11848345	Control	TC71	OK	13.8729	13.5228	-0.0368753	-0.0421996	0.9464	0.997725	no
ENSG00000011028	ENSG00000011028	MRC2	chr17:62626030-62693597	Control	TC71	OK	16.3455	7.38328	-1.14656	-2.26979	0.0028	0.328356	no
ENSG00000011114	ENSG00000011114	BTBD7	chr14:93237549-93333092	Control	TC71	OK	10.1686	7.72615	-0.396303	-0.581534	0.3436	0.997725	no
ENSG00000011132	ENSG00000011132	APBA3	chr19:3750818-3761699	Control	TC71	OK	9.31037	11.0252	0.24389	0.390627	0.62755	0.997725	no
ENSG00000011143	ENSG00000011143	MKS1	chr17:58205436-58268518	Control	TC71	OK	9.3153	6.34406	-0.554195	-0.860644	0.31985	0.997725	no
ENSG00000011198	ENSG00000011198	ABHD5	chr3:43286511-43734371	Control	TC71	OK	55.7696	38.1765	-0.546794	-0.857968	0.28235	0.997725	no
ENSG00000011243	ENSG00000011243	AKAP8L	chr19:15353384-15419141	Control	TC71	OK	38.6207	31.0371	-0.315381	-0.52032	0.56225	0.997725	no
ENSG00000011258	ENSG00000011258	MBTD1	chr17:51177424-51260163	Control	TC71	OK	8.87127	8.58093	-0.0480057	-0.072521	0.90395	0.997725	no
ENSG00000011260	ENSG00000011260	UTP18	chr17:51260527-51297936	Control	TC71	OK	11.5652	12.1356	0.069449	0.110073	0.89355	0.997725	no
ENSG00000011275	ENSG00000011275	RNF216	chr7:5620046-5781739	Control	TC71	OK	25.7771	22.2196	-0.214257	-0.346465	0.60015	0.997725	no
ENSG00000011295	ENSG00000011295	TTC19	chr17:15976559-16353656	Control	TC71	OK	19.9521	18.4854	-0.110153	-0.0754331	0.89505	0.997725	no
ENSG00000011304	ENSG00000011304	PTBP1	chr19:797074-812327	Control	TC71	FAIL	118.991	97.1976	0	0	1	1	no
ENSG00000011376	ENSG00000011376	LARS2	chr3:45388505-45549421	Control	TC71	OK	9.67527	8.87023	-0.125331	-0.177612	0.80935	0.997725	no
ENSG00000011405	ENSG00000011405	PIK3C2A	chr11:17074388-17207983	Control	TC71	OK	25.3111	21.9679	-0.204375	-0.117634	0.8297	0.997725	no
ENSG00000011422	ENSG00000011422	PLAUR	chr19:43646094-43670547	Control	TC71	OK	115.134	120.619	0.0671403	0.190973	0.8247	0.997725	no
ENSG00000011451	ENSG00000011451	WIZ	chr19:15419979-15449951	Control	TC71	OK	8.73281	6.67217	-0.388288	-0.907629	0.2331	0.997725	no
ENSG00000011454	ENSG00000011454	RABGAP1	chr9:122940832-123104866	Control	TC71	OK	29.1154	27.7652	-0.0685047	-0.092932	0.90075	0.997725	no
ENSG00000011478	ENSG00000011478	QPCTL	chr19:45687453-45703989	Control	TC71	OK	4.28662	1.86138	-1.20347	-1.04871	0.22655	0.997725	no
ENSG00000011485	ENSG00000011485	PPP5C	chr19:46346993-46392981	Control	TC71	OK	31.3424	34.9744	0.158184	0.260687	0.7547	0.997725	no
ENSG00000011523	ENSG00000011523	CEP68	chr2:65056365-65130106	Control	TC71	OK	13.048	11.7687	-0.148882	-0.226098	0.7901	0.997725	no
ENSG00000011566	ENSG00000011566	MAP4K3	chr2:39249265-39717963	Control	TC71	OK	41.8145	41.417	-0.0137824	-0.0144836	0.98535	0.997725	no
ENSG00000011600	ENSG00000011600	TYROBP	chr19:35904400-35908295	Control	TC71	OK	728.832	616.433	-0.241641	-0.786978	0.35585	0.997725	no
ENSG00000011638	ENSG00000011638	TMEM159	chr16:20933110-21180616	Control	TC71	OK	5.92806	4.18572	-0.502082	-0.74875	0.3668	0.997725	no
ENSG00000012048	ENSG00000012048	BRCA1	chr17:43044294-43211689	Control	TC71	OK	7.26385	5.74595	-0.338189	-0.151183	0.72515	0.997725	no
ENSG00000012061	ENSG00000012061	ERCC1	chr19:45379633-45478828	Control	TC71	OK	22.5204	26.1964	0.218135	0.388007	0.64715	0.997725	no
ENSG00000012124	ENSG00000012124	CD22	chr19:35319260-35347355	Control	TC71	OK	75.8522	26.6878	-1.50701	-3.00218	0.00055	0.108814	no
ENSG00000012174	ENSG00000012174	MBTPS2	chrX:21839635-21885424	Control	TC71	OK	8.34913	9.31443	0.157842	0.381324	0.65655	0.997725	no
ENSG00000012211	ENSG00000012211	PRICKLE3	chrX:49175263-49186528	Control	TC71	OK	9.83627	6.44735	-0.609404	-1.04205	0.23405	0.997725	no
ENSG00000012232	ENSG00000012232	EXTL3	chr8:28600468-28755599	Control	TC71	OK	6.13286	5.31921	-0.205349	-0.364481	0.5582	0.997725	no
ENSG00000012660	ENSG00000012660	ELOVL5	chr6:53267397-53349179	Control	TC71	OK	67.697	65.2867	-0.0523028	-0.130632	0.8643	0.997725	no
ENSG00000012779	ENSG00000012779	ALOX5	chr10:45374175-45453121	Control	TC71	OK	11.9861	7.47545	-0.681129	-0.878019	0.31615	0.997725	no
ENSG00000012817	ENSG00000012817	KDM5D	chrY:19703864-19744939	Control	TC71	OK	46.331	34.9978	-0.404714	-0.793501	0.3389	0.997725	no
ENSG00000012822	ENSG00000012822	CALCOCO1	chr12:53708516-53727745	Control	TC71	OK	80.0103	65.5429	-0.287748	-0.686494	0.3874	0.997725	no
ENSG00000012963	ENSG00000012963	UBR7	chr14:93184950-93229215	Control	TC71	OK	3.29933	3.32822	0.0125749	0.0188026	0.98135	0.997725	no
ENSG00000012983	ENSG00000012983	MAP4K5	chr14:50418500-50668331	Control	TC71	OK	16.4426	5.08742	-1.69243	-1.55042	0.04235	0.997725	no
ENSG00000013275	ENSG00000013275	PSMC4	chr19:39971004-39981441	Control	TC71	OK	19.2459	19.7095	0.0343394	0.0846834	0.9216	0.997725	no
ENSG00000013288	ENSG00000013288	MAN2B2	chr4:6575174-6623362	Control	TC71	OK	22.5967	16.8213	-0.42582	-0.921615	0.1846	0.997725	no
ENSG00000013306	ENSG00000013306	SLC25A39	chr17:44319624-44324870	Control	TC71	OK	27.9089	22.8478	-0.288666	-0.701091	0.39915	0.997725	no
ENSG00000013364	ENSG00000013364	MVP	chr16:29806105-29848039	Control	TC71	OK	106.208	103.422	-0.0383584	-0.0463524	0.94625	0.997725	no
ENSG00000013374	ENSG00000013374	NUB1	chr7:151341698-151413354	Control	TC71	OK	41.4201	36.072	-0.199454	-0.392446	0.64435	0.997725	no
ENSG00000013375	ENSG00000013375	PGM3	chr6:83067665-83198932	Control	TC71	OK	10.7896	20.1011	0.897628	0.617507	0.3611	0.997725	no
ENSG00000013441	ENSG00000013441	CLK1	chr2:200853008-200864744	Control	TC71	OK	43.0697	50.9847	0.24339	0.482997	0.57845	0.997725	no
ENSG00000013503	ENSG00000013503	POLR3B	chr12:106357657-106889316	Control	TC71	OK	4.39956	4.08318	-0.107665	-0.136812	0.83475	0.997725	no
ENSG00000013523	ENSG00000013523	ANGEL1	chr14:76762188-76826246	Control	TC71	OK	35.8175	26.6797	-0.42492	-0.428084	0.52255	0.997725	no
ENSG00000013561	ENSG00000013561	RNF14	chr5:141943584-141990291	Control	TC71	OK	18.7089	18.2246	-0.0378402	-0.0656452	0.938	0.997725	no
ENSG00000013563	ENSG00000013563	DNASE1L1	chrX:154389954-154421726	Control	TC71	OK	12.6429	10.3695	-0.285982	-0.216372	0.7271	0.997725	no
ENSG00000013573	ENSG00000013573	DDX11	chr12:31020762-31104791	Control	TC71	OK	4.65568	4.14048	-0.169196	-0.216713	0.7919	0.997725	no
ENSG00000013583	ENSG00000013583	HEBP1	chr12:12927725-13000273	Control	TC71	OK	26.6767	27.0776	0.0215167	0.0562096	0.94575	0.997725	no
ENSG00000013810	ENSG00000013810	TACC3	chr4:1721489-1745176	Control	TC71	OK	19.4169	16.1802	-0.263084	-0.449148	0.6026	0.997725	no
ENSG00000014123	ENSG00000014123	UFL1	chr6:96358373-96555276	Control	TC71	OK	10.2708	12.0062	0.225235	0.612553	0.44185	0.997725	no
ENSG00000014138	ENSG00000014138	POLA2	chr11:65261761-65305589	Control	TC71	OK	11.0638	10.1799	-0.12013	-0.233864	0.7786	0.997725	no
ENSG00000014164	ENSG00000014164	ZC3H3	chr8:143437654-143541453	Control	TC71	OK	9.36539	5.89507	-0.66783	-1.3011	0.06455	0.997725	no
ENSG00000014216	ENSG00000014216	CAPN1	chr11:65177605-65212006	Control	TC71	OK	86.1297	72.3254	-0.252007	-0.550814	0.50235	0.997725	no
ENSG00000014257	ENSG00000014257	ACPP	chr3:132317366-132368298	Control	TC71	OK	6.11564	5.8947	-0.0530829	-0.0876049	0.90815	0.997725	no
ENSG00000014641	ENSG00000014641	MDH1	chr2:63121382-63827843	Control	TC71	OK	387.085	408.026	0.0760101	0.176683	0.8331	0.997725	no
ENSG00000014824	ENSG00000014824	SLC30A9	chr4:41990471-42090457	Control	TC71	OK	25.7083	25.6358	-0.00407454	-0.00645114	0.9941	0.998006	no
ENSG00000014919	ENSG00000014919	COX15	chr10:99659505-99756134	Control	TC71	OK	30.5736	29.5147	-0.0508506	-0.0735155	0.9125	0.997725	no
ENSG00000015133	ENSG00000015133	CCDC88C	chr14:91271322-91417844	Control	TC71	OK	16.1191	12.6841	-0.345746	-0.420736	0.64445	0.997725	no
ENSG00000015153	ENSG00000015153	YAF2	chr12:42157103-42238349	Control	TC71	OK	14.6951	14.3145	-0.037855	-0.0462119	0.95155	0.997725	no
ENSG00000015171	ENSG00000015171	ZMYND11	chr10:134464-254637	Control	TC71	OK	20.0953	18.6438	-0.108163	-0.145667	0.833	0.997725	no
ENSG00000015285	ENSG00000015285	WAS	chrX:48676595-48691427	Control	TC71	OK	51.6369	37.7762	-0.450925	-0.753858	0.33295	0.997725	no
ENSG00000015475	ENSG00000015475	BID	chr22:17734137-17774770	Control	TC71	OK	65.1016	74.6858	0.198139	0.325554	0.69875	0.997725	no
ENSG00000015479	ENSG00000015479	MATR3	chr5:138946719-139331677	Control	TC71	OK	80.0226	85.1469	0.089546	0.162624	0.83855	0.997725	no
ENSG00000015532	ENSG00000015532	XYLT2	chr17:50346091-50365232	Control	TC71	OK	7.8858	6.38488	-0.304597	-0.602786	0.45385	0.997725	no
ENSG00000015568	ENSG00000015568	RGPD5	chr2:109792757-109857695	Control	TC71	OK	28.0903	31.5702	0.168491	0.192023	0.83115	0.997725	no
ENSG00000015676	ENSG00000015676	NUDCD3	chr7:44379120-44490880	Control	TC71	OK	34.1637	26.7504	-0.352902	-0.384981	0.6213	0.997725	no
ENSG00000016391	ENSG00000016391	CHDH	chr3:53283427-53846390	Control	TC71	OK	5.50988	2.45722	-1.16499	-1.25956	0.0693	0.997725	no
ENSG00000016864	ENSG00000016864	GLT8D1	chr3:52495337-52770949	Control	TC71	OK	18.5489	20.0082	0.109261	0.0690579	0.9034	0.997725	no
ENSG00000017260	ENSG00000017260	ATP2C1	chr3:130850594-131381475	Control	TC71	OK	33.4157	42.5175	0.34753	0.478219	0.57245	0.997725	no
ENSG00000017797	ENSG00000017797	RALBP1	chr18:9475008-9538116	Control	TC71	OK	19.8057	20.8146	0.0716771	0.173845	0.82465	0.997725	no
ENSG00000018189	ENSG00000018189	RUFY3	chr4:70703746-70807315	Control	TC71	OK	29.1329	25.7069	-0.180497	-0.298517	0.71685	0.997725	no
ENSG00000018280	ENSG00000018280	SLC11A1	chr2:218382028-218396894	Control	TC71	OK	8.52634	12.6245	0.566228	0.755872	0.29695	0.997725	no
ENSG00000018510	ENSG00000018510	AGPS	chr2:177227594-177559299	Control	TC71	OK	27.4238	22.6298	-0.277203	-0.228076	0.72235	0.997725	no
ENSG00000018610	ENSG00000018610	CXorf56	chrX:119538148-119565408	Control	TC71	OK	6.87723	7.10091	0.0461763	0.0950156	0.90805	0.997725	no
ENSG00000018699	ENSG00000018699	TTC27	chr2:32628031-32821051	Control	TC71	OK	6.57622	8.09954	0.300581	0.378243	0.61085	0.997725	no
ENSG00000019144	ENSG00000019144	PHLDB1	chr11:118606439-118679690	Control	TC71	OK	4.28624	6.71875	0.64848	0.875426	0.1971	0.997725	no
ENSG00000019169	ENSG00000019169	MARCO	chr2:118942165-118994660	Control	TC71	OK	26.9836	15.9302	-0.760318	-1.25048	0.13595	0.997725	no
ENSG00000019582	ENSG00000019582	CD74	chr5:150401636-150412929	Control	TC71	OK	1740.86	1219.08	-0.514012	-1.41819	0.09615	0.997725	no
ENSG00000019995	ENSG00000019995	ZRANB1	chr10:124917142-125161170	Control	TC71	OK	9.33068	9.8278	0.0748854	0.105774	0.85625	0.997725	no
ENSG00000020129	ENSG00000020129	NCDN	chr1:35433489-35567274	Control	TC71	OK	6.0349	5.15761	-0.226627	-0.238418	0.75175	0.997725	no
ENSG00000020256	ENSG00000020256	ZFP64	chr20:52051662-52204308	Control	TC71	OK	6.25258	5.12341	-0.287348	-0.416894	0.56855	0.997725	no
ENSG00000020426	ENSG00000020426	MNAT1	chr14:60734741-61083733	Control	TC71	OK	18.998	16.2573	-0.22476	-0.0978475	0.855	0.997725	no
ENSG00000020577	ENSG00000020577	SAMD4A	chr14:54567096-54793315	Control	TC71	OK	10.9824	7.47737	-0.554586	-1.07339	0.18275	0.997725	no
ENSG00000020633	ENSG00000020633	RUNX3	chr1:24899510-24965121	Control	TC71	OK	9.44952	6.7053	-0.494939	-1.00998	0.1886	0.997725	no
ENSG00000020922	ENSG00000020922	MRE11	chr11:94415577-94499583	Control	TC71	OK	4.54269	5.31006	0.22518	0.273509	0.70735	0.997725	no
ENSG00000021355	ENSG00000021355	SERPINB1	chr6:2832331-2842006	Control	TC71	OK	107.102	100.424	-0.0928754	-0.196786	0.81385	0.997725	no
ENSG00000021574	ENSG00000021574	SPAST	chr2:32063546-32157637	Control	TC71	OK	10.0379	12.5856	0.326309	0.710641	0.3856	0.997725	no
ENSG00000021762	ENSG00000021762	OSBPL5	chr11:3087115-3166739	Control	TC71	OK	14.9882	7.93614	-0.917317	-1.55293	0.0807	0.997725	no
ENSG00000021776	ENSG00000021776	AQR	chr15:34851781-34969839	Control	TC71	OK	14.9085	18.6553	0.323453	0.484041	0.49895	0.997725	no
ENSG00000022267	ENSG00000022267	FHL1	chrX:136146701-136211359	Control	TC71	OK	4.95442	1.18217	-2.06728	-2.17477	0.00075	0.133817	no
ENSG00000022277	ENSG00000022277	RTF2	chr20:56468584-56526142	Control	TC71	OK	67.1131	71.0001	0.0812265	0.179109	0.83355	0.997725	no
ENSG00000022567	ENSG00000022567	SLC45A4	chr8:141207165-141308305	Control	TC71	OK	23.667	21.4405	-0.142537	-0.249035	0.75745	0.997725	no
ENSG00000022840	ENSG00000022840	RNF10	chr12:120503273-120577594	Control	TC71	OK	128.263	106.824	-0.26386	-0.491482	0.5485	0.997725	no
ENSG00000022976	ENSG00000022976	ZNF839	chr14:102317376-102362916	Control	TC71	OK	5.60445	4.39473	-0.350798	-0.487576	0.50875	0.997725	no
ENSG00000023041	ENSG00000023041	ZDHHC6	chr10:112374017-112446917	Control	TC71	OK	24.3636	28.9635	0.249512	0.41096	0.58825	0.997725	no
ENSG00000023171	ENSG00000023171	GRAMD1B	chr11:123358427-123627774	Control	TC71	OK	6.05703	4.05091	-0.580364	-0.530453	0.4618	0.997725	no
ENSG00000023191	ENSG00000023191	RNH1	chr11:494511-507300	Control	TC71	OK	74.3859	58.3121	-0.351235	-0.989561	0.2307	0.997725	no
ENSG00000023228	ENSG00000023228	NDUFS1	chr2:206114816-206162928	Control	TC71	OK	14.3334	18.0753	0.334641	0.491524	0.4832	0.997725	no
ENSG00000023287	ENSG00000023287	RB1CC1	chr8:52622455-52745843	Control	TC71	OK	14.9151	14.6542	-0.0254613	-0.0304358	0.95555	0.997725	no
ENSG00000023318	ENSG00000023318	ERP44	chr9:99979178-100099040	Control	TC71	OK	10.0995	10.9912	0.122064	0.351479	0.6756	0.997725	no
ENSG00000023330	ENSG00000023330	ALAS1	chr3:52198085-52214327	Control	TC71	OK	217.612	186.948	-0.219122	-0.438849	0.5466	0.997725	no
ENSG00000023445	ENSG00000023445	BIRC3	chr11:102317449-102339403	Control	TC71	OK	6.48224	21.8398	1.7524	2.96116	5e-05	0.018407	yes
ENSG00000023516	ENSG00000023516	AKAP11	chr13:42272152-42323267	Control	TC71	OK	9.11104	12.1116	0.410704	1.28539	0.1412	0.997725	no
ENSG00000023572	ENSG00000023572	GLRX2	chr1:193012249-193106114	Control	TC71	OK	14.4686	19.2936	0.415192	0.375122	0.6608	0.997725	no
ENSG00000023697	ENSG00000023697	DERA	chr12:15911171-16037282	Control	TC71	OK	26.9676	33.1631	0.298351	0.660294	0.4309	0.997725	no
ENSG00000023734	ENSG00000023734	STRAP	chr12:15882390-15903478	Control	TC71	OK	33.1225	37.6861	0.186221	0.42644	0.6116	0.997725	no
ENSG00000023892	ENSG00000023892	DEF6	chr6:35297851-35321771	Control	TC71	OK	11.8864	10.3617	-0.198056	-0.326678	0.66495	0.997725	no
ENSG00000023902	ENSG00000023902	PLEKHO1	chr1:150149182-150164720	Control	TC71	OK	110.629	154.082	0.477971	1.23355	0.1416	0.997725	no
ENSG00000023909	ENSG00000023909	GCLM	chr1:93885204-93909456	Control	TC71	OK	5.47644	5.76507	0.0740998	0.104848	0.88045	0.997725	no
ENSG00000024048	ENSG00000024048	UBR2	chr6:42564061-42693504	Control	TC71	OK	10.6352	12.3393	0.214418	0.572624	0.49765	0.997725	no
ENSG00000024862	ENSG00000024862	CCDC28A	chr6:138725210-138793319	Control	TC71	OK	13.3566	14.9005	0.15781	0.374039	0.6623	0.997725	no
ENSG00000025039	ENSG00000025039	RRAGD	chr6:89364635-89412270	Control	TC71	OK	68.7509	68.493	-0.00542228	-0.0114798	0.98865	0.997725	no
ENSG00000025293	ENSG00000025293	PHF20	chr20:35771973-35950381	Control	TC71	OK	48.8619	34.7632	-0.491148	-0.783473	0.3355	0.997725	no
ENSG00000025434	ENSG00000025434	NR1H3	chr11:47239301-47269032	Control	TC71	OK	76.6688	81.4264	0.0868554	0.147235	0.85925	0.997725	no
ENSG00000025708	ENSG00000025708	TYMP	chr22:50523567-50532580	Control	TC71	OK	42.378	32.9048	-0.36502	-1.00021	0.23975	0.997725	no
ENSG00000025770	ENSG00000025770	NCAPH2	chr22:50508215-50523472	Control	TC71	OK	9.91139	9.63064	-0.0414555	-0.0661593	0.93525	0.997725	no
ENSG00000025772	ENSG00000025772	TOMM34	chr20:44910061-44960486	Control	TC71	OK	3.77466	4.7587	0.334221	0.471156	0.58055	0.997725	no
ENSG00000025796	ENSG00000025796	SEC63	chr6:107867755-107959986	Control	TC71	OK	37.0393	50.6594	0.451774	0.774141	0.36615	0.997725	no
ENSG00000025800	ENSG00000025800	KPNA6	chr1:32108037-32176568	Control	TC71	OK	16.7455	17.1189	0.0318137	0.095356	0.903	0.997725	no
ENSG00000026025	ENSG00000026025	VIM	chr10:17214238-17237593	Control	TC71	OK	2508.37	2077.48	-0.27192	-0.497944	0.5302	0.997725	no
ENSG00000026036	ENSG00000026036	RTEL1-TNFRSF6B	chr20:63657809-63743505	Control	TC71	OK	5.73236	4.47419	-0.357503	-0.537115	0.5378	0.997725	no
ENSG00000026103	ENSG00000026103	FAS	chr10:88879733-89015785	Control	TC71	OK	25.3312	29.2196	0.206023	0.383556	0.6521	0.997725	no
ENSG00000026297	ENSG00000026297	RNASET2	chr6:166409363-166957191	Control	TC71	OK	41.4657	22.6868	-0.870064	-0.993993	0.2243	0.997725	no
ENSG00000026508	ENSG00000026508	CD44	chr11:35138869-35232402	Control	TC71	OK	795.578	1248.83	0.650503	1.15332	0.1652	0.997725	no
ENSG00000026652	ENSG00000026652	AGPAT4	chr6:161129978-161274061	Control	TC71	OK	29.3529	25.8015	-0.186048	-0.259076	0.7415	0.997725	no
ENSG00000026751	ENSG00000026751	SLAMF7	chr1:160739056-160754821	Control	TC71	OK	44.2483	51.64	0.222866	0.570491	0.46075	0.997725	no
ENSG00000026950	ENSG00000026950	BTN3A1	chr6:26402236-26415216	Control	TC71	OK	16.6094	13.7847	-0.268939	-0.608141	0.44055	0.997725	no
ENSG00000027001	ENSG00000027001	MIPEP	chr13:23730188-23902655	Control	TC71	OK	11.9372	8.4225	-0.503144	-0.702761	0.4059	0.997725	no
ENSG00000027075	ENSG00000027075	PRKCH	chr14:61187558-61658696	Control	TC71	OK	6.88507	4.26611	-0.69055	-0.650805	0.30315	0.997725	no
ENSG00000027697	ENSG00000027697	IFNGR1	chr6:137197483-137219449	Control	TC71	OK	251.457	235.866	-0.0923432	-0.281278	0.73335	0.997725	no
ENSG00000027847	ENSG00000027847	B4GALT7	chr5:177600099-177610347	Control	TC71	OK	15.5522	13.4048	-0.214367	-0.353416	0.6409	0.997725	no
ENSG00000028116	ENSG00000028116	VRK2	chr2:57907650-58241686	Control	TC71	OK	7.7356	10.0298	0.374705	0.685045	0.40305	0.997725	no
ENSG00000028137	ENSG00000028137	TNFRSF1B	chr1:12166942-12209228	Control	TC71	OK	67.0661	57.5763	-0.220109	-0.562123	0.4347	0.997725	no
ENSG00000028203	ENSG00000028203	VEZT	chr12:95217745-95302790	Control	TC71	OK	16.8906	20.9302	0.309369	0.547092	0.5226	0.997725	no
ENSG00000028277	ENSG00000028277	POU2F2	chr19:42086109-42196585	Control	TC71	OK	2.97511	9.21365	1.63083	2.1419	0.0004	0.0888031	no
ENSG00000028310	ENSG00000028310	BRD9	chr5:795605-919357	Control	TC71	OK	23.3491	23.6775	0.0201489	0.0370194	0.96385	0.997725	no
ENSG00000028528	ENSG00000028528	SNX1	chr15:64094122-64146090	Control	TC71	OK	76.2591	54.1446	-0.49409	-0.986114	0.2121	0.997725	no
ENSG00000028839	ENSG00000028839	TBPL1	chr6:133952169-134052636	Control	TC71	OK	4.45082	7.83242	0.815388	0.954681	0.23405	0.997725	no
ENSG00000029153	ENSG00000029153	ARNTL2	chr12:27332853-27446625	Control	TC71	OK	5.25103	13.1551	1.32495	2.78952	0.00185	0.250249	no
ENSG00000029363	ENSG00000029363	BCLAF1	chr6:136256626-136289851	Control	TC71	FAIL	44.2716	37.0857	0	0	1	1	no
ENSG00000029364	ENSG00000029364	SLC39A9	chr14:69380122-69462388	Control	TC71	OK	27.787	31.2201	0.168066	0.36503	0.6219	0.997725	no
ENSG00000029639	ENSG00000029639	TFB1M	chr6:154733324-155314493	Control	TC71	OK	8.33428	11.0655	0.408934	0.240368	0.71625	0.997725	no
ENSG00000029725	ENSG00000029725	RABEP1	chr17:5282264-5469060	Control	TC71	OK	42.2011	39.2179	-0.10577	-0.137729	0.8243	0.997725	no
ENSG00000030066	ENSG00000030066	NUP160	chr11:47778086-47848555	Control	TC71	OK	13.2944	13.7501	0.048633	0.0442425	0.95875	0.997725	no
ENSG00000030110	ENSG00000030110	BAK1	chr6:33540045-33593338	Control	TC71	OK	16.5275	13.0225	-0.343861	-0.92133	0.28615	0.997725	no
ENSG00000030582	ENSG00000030582	GRN	chr17:44345085-44353102	Control	TC71	OK	1979.56	1231.49	-0.684774	-1.31969	0.12765	0.997725	no
ENSG00000031003	ENSG00000031003	FAM13B	chr5:137814332-138051961	Control	TC71	OK	23.0672	26.5138	0.200901	0.292433	0.7337	0.997725	no
ENSG00000031081	ENSG00000031081	ARHGAP31	chr3:119294372-119420714	Control	TC71	OK	35.5468	56.0846	0.657886	1.02178	0.0806	0.997725	no
ENSG00000031698	ENSG00000031698	SARS	chr1:109213917-109238169	Control	TC71	OK	108.624	110.559	0.0254666	0.0742824	0.9332	0.997725	no
ENSG00000031823	ENSG00000031823	RANBP3	chr19:5916138-5978142	Control	TC71	OK	42.5326	29.986	-0.504279	-0.820397	0.3084	0.997725	no
ENSG00000032219	ENSG00000032219	ARID4A	chr14:58298384-58395641	Control	TC71	OK	22.8016	20.935	-0.123219	-0.182206	0.80575	0.997725	no
ENSG00000032389	ENSG00000032389	EIPR1	chr2:3188924-3377882	Control	TC71	OK	16.9161	14.8273	-0.190134	-0.332716	0.68365	0.997725	no
ENSG00000032444	ENSG00000032444	PNPLA6	chr19:7522625-7561764	Control	TC71	OK	404.043	180.091	-1.16578	-2.34668	0.00995	0.619649	no
ENSG00000032742	ENSG00000032742	IFT88	chr13:20567068-20691437	Control	TC71	OK	3.63273	2.43216	-0.578816	-0.578452	0.4357	0.997725	no
ENSG00000033011	ENSG00000033011	ALG1	chr16:4882506-5097808	Control	TC71	OK	8.29393	7.67196	-0.112462	-0.0838772	0.9406	0.997725	no
ENSG00000033030	ENSG00000033030	ZCCHC8	chr12:122471599-122501073	Control	TC71	OK	20.8914	20.0707	-0.0578177	-0.123972	0.88185	0.997725	no
ENSG00000033050	ENSG00000033050	ABCF2	chr7:151207836-151227230	Control	TC71	OK	9.50334	10.3333	0.120794	0.186803	0.80705	0.997725	no
ENSG00000033100	ENSG00000033100	CHPF2	chr7:151232488-151277896	Control	TC71	OK	17.5602	11.617	-0.596075	-1.21595	0.13995	0.997725	no
ENSG00000033178	ENSG00000033178	UBA6	chr4:67612651-67701179	Control	TC71	OK	10.6423	15.1143	0.506107	0.608382	0.48505	0.997725	no
ENSG00000033327	ENSG00000033327	GAB2	chr11:78215296-78574874	Control	TC71	OK	32.3991	21.3161	-0.60401	-1.21819	0.0621	0.997725	no
ENSG00000033627	ENSG00000033627	ATP6V0A1	chr17:42458843-42522611	Control	TC71	OK	181.377	161.599	-0.166574	-0.290351	0.7248	0.997725	no
ENSG00000033800	ENSG00000033800	PIAS1	chr15:68054178-68257211	Control	TC71	OK	57.3486	64.4232	0.167821	0.212655	0.8112	0.997725	no
ENSG00000033867	ENSG00000033867	SLC4A7	chr3:27372720-27484420	Control	TC71	OK	17.434	27.611	0.663338	1.10165	0.17455	0.997725	no
ENSG00000034152	ENSG00000034152	MAP2K3	chr17:21284671-21315240	Control	TC71	OK	23.4616	21.5281	-0.124079	-0.227763	0.77595	0.997725	no
ENSG00000034510	ENSG00000034510	TMSB10	chr2:84821649-84907008	Control	TC71	OK	2363.52	2983.61	0.336121	1.03826	0.2256	0.997725	no
ENSG00000034533	ENSG00000034533	ASTE1	chr3:130850594-131381475	Control	TC71	OK	6.07158	6.68417	0.138677	0.10342	0.8756	0.997725	no
ENSG00000034677	ENSG00000034677	RNF19A	chr8:100157905-100336218	Control	TC71	OK	42.0409	40.5071	-0.0536175	-0.0747313	0.93535	0.997725	no
ENSG00000034693	ENSG00000034693	PEX3	chr6:143450806-143511690	Control	TC71	OK	6.73566	6.74304	0.00157874	0.000829318	0.99945	0.999672	no
ENSG00000034713	ENSG00000034713	GABARAPL2	chr16:75528531-75623300	Control	TC71	OK	45.23	54.6313	0.272449	0.522431	0.52695	0.997725	no
ENSG00000035115	ENSG00000035115	SH3YL1	chr2:217729-278283	Control	TC71	OK	11.8871	8.75528	-0.441169	-0.508329	0.4613	0.997725	no
ENSG00000035141	ENSG00000035141	FAM136A	chr2:70295974-70302090	Control	TC71	OK	21.0036	21.9503	0.0636029	0.173928	0.8333	0.997725	no
ENSG00000035403	ENSG00000035403	VCL	chr10:73995192-74151063	Control	TC71	OK	66.7341	50.0536	-0.414948	-0.603239	0.2975	0.997725	no
ENSG00000035681	ENSG00000035681	NSMAF	chr8:58583503-58659844	Control	TC71	OK	86.4588	104.269	0.270222	0.625565	0.47165	0.997725	no
ENSG00000035687	ENSG00000035687	ADSS	chr1:244352634-244452134	Control	TC71	OK	13.7578	16.5675	0.268111	0.462842	0.58445	0.997725	no
ENSG00000035862	ENSG00000035862	TIMP2	chr17:78852976-78925387	Control	TC71	OK	142.258	116.674	-0.286028	-0.835948	0.3295	0.997725	no
ENSG00000035928	ENSG00000035928	RFC1	chr4:39287455-39366375	Control	TC71	OK	27.0134	26.1827	-0.0450631	-0.0565754	0.9483	0.997725	no
ENSG00000036054	ENSG00000036054	TBC1D23	chr3:100260999-100325251	Control	TC71	OK	22.2976	22.152	-0.00945048	-0.0158261	0.98495	0.997725	no
ENSG00000036257	ENSG00000036257	CUL3	chr2:224464681-224585397	Control	TC71	OK	39.2044	42.9651	0.132147	0.271258	0.7347	0.997725	no
ENSG00000036549	ENSG00000036549	AC118549.1	chr1:77562415-77683419	Control	TC71	OK	27.1576	17.5111	-0.633092	-1.01597	0.1791	0.997725	no
ENSG00000037042	ENSG00000037042	TUBG2	chr17:42659304-42667006	Control	TC71	OK	4.55704	4.37917	-0.057438	-0.092452	0.9073	0.997725	no
ENSG00000037241	ENSG00000037241	RPL26L1	chr5:172954785-172969771	Control	TC71	OK	5.84449	7.69268	0.39641	0.570255	0.5072	0.997725	no
ENSG00000037474	ENSG00000037474	NSUN2	chr5:6599238-6633291	Control	TC71	OK	31.3028	30.652	-0.0303093	-0.0603091	0.9399	0.997725	no
ENSG00000037637	ENSG00000037637	FBXO42	chr1:16246838-16352454	Control	TC71	OK	16.4835	14.9788	-0.138103	-0.234114	0.7818	0.997725	no
ENSG00000037749	ENSG00000037749	MFAP3	chr5:153990127-154445850	Control	TC71	OK	14.5345	14.556	0.0021282	0.00268845	0.9976	0.999249	no
ENSG00000037757	ENSG00000037757	MRI1	chr19:13764531-13778462	Control	TC71	OK	9.05725	6.60493	-0.45553	-0.625909	0.42165	0.997725	no
ENSG00000037897	ENSG00000037897	METTL1	chr12:57762333-57818704	Control	TC71	OK	32.9787	30.3942	-0.117742	-0.131846	0.88575	0.997725	no
ENSG00000038002	ENSG00000038002	AGA	chr4:177430769-177442503	Control	TC71	OK	19.5492	22.3383	0.192407	0.385103	0.6521	0.997725	no
ENSG00000038210	ENSG00000038210	PI4K2B	chr4:25160640-25279092	Control	TC71	OK	5.50247	4.31704	-0.350037	-0.7963	0.3482	0.997725	no
ENSG00000038219	ENSG00000038219	BOD1L1	chr4:13568737-13627723	Control	TC71	OK	31.7925	36.3775	0.194359	0.0970175	0.7633	0.997725	no
ENSG00000038274	ENSG00000038274	MAT2B	chr5:163503113-163519336	Control	TC71	OK	39.3341	52.3883	0.413465	0.89523	0.27815	0.997725	no
ENSG00000038358	ENSG00000038358	EDC4	chr16:67873022-67888855	Control	TC71	OK	41.7026	31.5749	-0.401357	-0.741996	0.3743	0.997725	no
ENSG00000038382	ENSG00000038382	TRIO	chr5:14143701-14532128	Control	TC71	OK	155.398	139.262	-0.158169	-0.27781	0.7568	0.997725	no
ENSG00000038532	ENSG00000038532	CLEC16A	chr16:10944487-11182189	Control	TC71	OK	22.4992	22.2462	-0.0163116	-0.0255612	0.9736	0.997725	no
ENSG00000038945	ENSG00000038945	MSR1	chr8:16107877-16567490	Control	TC71	OK	11.212	2.51718	-2.15516	-3.81826	5e-05	0.018407	yes
ENSG00000039068	ENSG00000039068	CDH1	chr16:68737224-68835548	Control	TC71	OK	21.8599	2.12375	-3.3636	-2.77831	0.0002	0.058166	no
ENSG00000039123	ENSG00000039123	MTREX	chr5:55307759-55535050	Control	TC71	OK	35.0405	31.2427	-0.165505	-0.240173	0.7608	0.997725	no
ENSG00000039319	ENSG00000039319	ZFYVE16	chr5:80408012-80479350	Control	TC71	OK	155.496	241.497	0.635127	1.23485	0.0915	0.997725	no
ENSG00000039523	ENSG00000039523	RIPOR1	chr16:67517861-67546788	Control	TC71	OK	74.965	59.4177	-0.335323	-0.651654	0.4236	0.997725	no
ENSG00000039560	ENSG00000039560	RAI14	chr5:34656236-34832627	Control	TC71	OK	3.50292	5.3991	0.624161	0.453365	0.2656	0.997725	no
ENSG00000039650	ENSG00000039650	PNKP	chr19:49818278-49888749	Control	TC71	OK	71.5841	51.9999	-0.461132	-0.495363	0.60405	0.997725	no
ENSG00000040199	ENSG00000040199	PHLPP2	chr16:71623707-71724701	Control	TC71	OK	4.38784	4.35805	-0.00982681	-0.0134997	0.98275	0.997725	no
ENSG00000040275	ENSG00000040275	SPDL1	chr5:169583633-169604778	Control	TC71	OK	4.19169	4.02919	-0.0570398	-0.071292	0.92205	0.997725	no
ENSG00000040341	ENSG00000040341	STAU2	chr8:73420003-73878910	Control	TC71	OK	9.20259	6.28066	-0.551124	-0.405455	0.49895	0.997725	no
ENSG00000040487	ENSG00000040487	PQLC2	chr1:19312325-19329300	Control	TC71	OK	22.316	19.2074	-0.216421	-0.542789	0.5218	0.997725	no
ENSG00000040531	ENSG00000040531	CTNS	chr17:3636467-3661542	Control	TC71	OK	39.5042	32.0664	-0.300942	-0.596903	0.4448	0.997725	no
ENSG00000040608	ENSG00000040608	RTN4R	chr22:20241414-20283246	Control	TC71	OK	25.1249	6.14657	-2.03126	-4.08882	5e-05	0.018407	yes
ENSG00000040633	ENSG00000040633	PHF23	chr17:7235027-7239722	Control	TC71	OK	31.4036	29.5441	-0.0880591	-0.205515	0.7921	0.997725	no
ENSG00000040933	ENSG00000040933	INPP4A	chr2:98444853-98594390	Control	TC71	OK	16.9855	14.2305	-0.255313	-0.387142	0.63615	0.997725	no
ENSG00000041357	ENSG00000041357	PSMA4	chr15:78540404-78552419	Control	TC71	OK	83.9839	114.917	0.452412	1.21337	0.16125	0.997725	no
ENSG00000041802	ENSG00000041802	LSG1	chr3:194584010-194672477	Control	TC71	OK	20.8204	21.9294	0.074867	0.128626	0.87285	0.997725	no
ENSG00000041880	ENSG00000041880	PARP3	chr3:51942344-51948867	Control	TC71	OK	7.57805	9.3324	0.30042	0.462938	0.5723	0.997725	no
ENSG00000041988	ENSG00000041988	THAP3	chr1:6624865-6701924	Control	TC71	OK	7.15579	5.79199	-0.305052	-0.245816	0.72395	0.997725	no
ENSG00000042062	ENSG00000042062	RIPOR3	chr20:50586107-50691528	Control	TC71	OK	2.82897	2.96091	0.0657654	0.0842025	0.92405	0.997725	no
ENSG00000042088	ENSG00000042088	TDP1	chr14:89954938-90044768	Control	TC71	OK	14.4593	13.3693	-0.113069	-0.192615	0.82215	0.997725	no
ENSG00000042286	ENSG00000042286	AIFM2	chr10:70052795-70132934	Control	TC71	FAIL	10.5385	11.7941	0	0	1	1	no
ENSG00000042429	ENSG00000042429	MED17	chr11:93661638-93814963	Control	TC71	OK	17.0764	11.9432	-0.515823	-0.48041	0.5203	0.997725	no
ENSG00000042445	ENSG00000042445	RETSAT	chr2:85342087-85391752	Control	TC71	OK	12.826	10.8296	-0.244094	-0.354752	0.63365	0.997725	no
ENSG00000042493	ENSG00000042493	CAPG	chr2:85394747-85418432	Control	TC71	OK	1304.52	1151.5	-0.180009	-0.482094	0.5621	0.997725	no
ENSG00000042753	ENSG00000042753	AP2S1	chr19:46838135-46850992	Control	TC71	OK	224.766	242.759	0.111101	0.295845	0.7224	0.997725	no
ENSG00000043093	ENSG00000043093	DCUN1D1	chr3:182938073-182985953	Control	TC71	OK	9.54619	14.8588	0.638322	1.11318	0.1355	0.997725	no
ENSG00000043143	ENSG00000043143	JADE2	chr5:134524311-134583230	Control	TC71	OK	18.9657	12.4933	-0.602233	-0.875249	0.28365	0.997725	no
ENSG00000043462	ENSG00000043462	LCP2	chr5:170232446-170298227	Control	TC71	OK	70.1009	48.546	-0.530081	-1.0451	0.22985	0.997725	no
ENSG00000043514	ENSG00000043514	TRIT1	chr1:39841021-39883511	Control	TC71	OK	12.2397	8.36814	-0.548591	-0.852323	0.27985	0.997725	no
ENSG00000044090	ENSG00000044090	CUL7	chr6:43037616-43075099	Control	TC71	OK	8.4489	9.28202	0.135677	0.224424	0.73605	0.997725	no
ENSG00000044115	ENSG00000044115	CTNNA1	chr5:138610966-138935034	Control	TC71	OK	187.308	196.843	0.0716393	0.134348	0.87285	0.997725	no
ENSG00000044446	ENSG00000044446	PHKA2	chrX:18890295-18984598	Control	TC71	OK	24.2295	13.1321	-0.883663	-1.34806	0.0772	0.997725	no
ENSG00000044459	ENSG00000044459	CNTLN	chr9:17134981-17503923	Control	TC71	OK	4.6693	5.24529	0.167816	0.354855	0.6702	0.997725	no
ENSG00000044574	ENSG00000044574	HSPA5	chr9:125234852-125241330	Control	TC71	OK	98.1945	91.1475	-0.107439	-0.353426	0.68595	0.997725	no
ENSG00000046651	ENSG00000046651	OFD1	chrX:13734744-13769353	Control	TC71	OK	6.00879	3.59288	-0.741933	-0.958039	0.1866	0.997725	no
ENSG00000047056	ENSG00000047056	WDR37	chr10:1049537-1132297	Control	TC71	OK	25.6444	19.1953	-0.417891	-0.887677	0.25825	0.997725	no
ENSG00000047188	ENSG00000047188	YTHDC2	chr5:113513682-113595285	Control	TC71	OK	13.8324	13.2506	-0.0619846	-0.0830793	0.913	0.997725	no
ENSG00000047249	ENSG00000047249	ATP6V1H	chr8:53715556-53843558	Control	TC71	OK	73.8967	84.0934	0.186482	0.427117	0.6127	0.997725	no
ENSG00000047315	ENSG00000047315	POLR2B	chr4:56907875-57205510	Control	TC71	OK	77.2391	78.3736	0.0210365	0.0253206	0.97575	0.997725	no
ENSG00000047346	ENSG00000047346	FAM214A	chr15:52577841-52709817	Control	TC71	OK	14.3178	12.1188	-0.240565	-0.372006	0.6488	0.997725	no
ENSG00000047365	ENSG00000047365	ARAP2	chr4:35948220-36274220	Control	TC71	OK	44.0604	55.6506	0.336914	0.473194	0.55115	0.997725	no
ENSG00000047410	ENSG00000047410	TPR	chr1:186296278-186375693	Control	TC71	OK	51.8262	55.7063	0.104161	0.146046	0.84225	0.997725	no
ENSG00000047457	ENSG00000047457	CP	chr3:149129583-149222055	Control	TC71	OK	3.83228	1.78627	-1.10126	-0.489825	0.37385	0.997725	no
ENSG00000047578	ENSG00000047578	KIAA0556	chr16:27550132-27780369	Control	TC71	OK	23.2791	17.1464	-0.441126	-0.541208	0.5314	0.997725	no
ENSG00000047579	ENSG00000047579	DTNBP1	chr6:15522800-15663058	Control	TC71	OK	12.4656	14.3513	0.203228	0.451483	0.59455	0.997725	no
ENSG00000047621	ENSG00000047621	C12orf4	chr12:4487727-4538508	Control	TC71	OK	17.6347	19.5803	0.150986	0.279391	0.68985	0.997725	no
ENSG00000047634	ENSG00000047634	SCML1	chrX:17737448-17754988	Control	TC71	OK	7.37525	7.16618	-0.0414878	-0.0682218	0.93485	0.997725	no
ENSG00000047644	ENSG00000047644	WWC3	chrX:10015561-10144478	Control	TC71	OK	4.59821	4.95736	0.1085	0.169727	0.7719	0.997725	no
ENSG00000047849	ENSG00000047849	MAP4	chr3:47850689-48089272	Control	TC71	OK	31.5534	39.3435	0.318331	0.51569	0.3692	0.997725	no
ENSG00000047932	ENSG00000047932	GOPC	chr6:117288299-117602542	Control	TC71	OK	7.16071	7.41462	0.0502696	0.129564	0.87675	0.997725	no
ENSG00000048028	ENSG00000048028	USP28	chr11:113797873-113875570	Control	TC71	OK	18.3289	15.61	-0.231655	-0.385336	0.64965	0.997725	no
ENSG00000048052	ENSG00000048052	HDAC9	chr7:18086948-19002416	Control	TC71	OK	5.38749	3.45956	-0.639025	-0.786262	0.24775	0.997725	no
ENSG00000048140	ENSG00000048140	TSPAN17	chr5:176647386-176659054	Control	TC71	OK	30.361	25.8591	-0.231547	-0.575874	0.4758	0.997725	no
ENSG00000048162	ENSG00000048162	NOP16	chr5:176365467-176416569	Control	TC71	OK	25.9632	30.125	0.21449	0.220895	0.8108	0.997725	no
ENSG00000048342	ENSG00000048342	CC2D2A	chr4:15469864-15601557	Control	TC71	OK	5.46498	6.10669	0.160176	0.163315	0.8477	0.997725	no
ENSG00000048392	ENSG00000048392	RRM2B	chr8:102204501-102239118	Control	TC71	OK	34.5046	44.529	0.367958	0.577716	0.46195	0.997725	no
ENSG00000048405	ENSG00000048405	ZNF800	chr7:127346789-127431924	Control	TC71	OK	19.133	21.6271	0.176782	0.34421	0.6584	0.997725	no
ENSG00000048471	ENSG00000048471	SNX29	chr16:11976736-12611044	Control	TC71	OK	38.8424	27.5974	-0.493099	-0.798292	0.2189	0.997725	no
ENSG00000048544	ENSG00000048544	MRPS10	chr6:42206800-42217865	Control	TC71	OK	11.2395	13.3604	0.249391	0.652358	0.45085	0.997725	no
ENSG00000048649	ENSG00000048649	RSF1	chr11:77659995-77821017	Control	TC71	OK	29.7714	28.8555	-0.0450846	-0.0629128	0.9363	0.997725	no
ENSG00000048707	ENSG00000048707	VPS13D	chr1:12230031-12512047	Control	TC71	OK	48.7705	40.671	-0.262008	-0.243973	0.66675	0.997725	no
ENSG00000048740	ENSG00000048740	CELF2	chr10:10798396-11336675	Control	TC71	FAIL	28.5869	24.8186	0	0	1	1	no
ENSG00000048828	ENSG00000048828	FAM120A	chr9:93446493-93566107	Control	TC71	OK	100.077	100.67	0.0085223	0.0204258	0.9802	0.997725	no
ENSG00000048991	ENSG00000048991	R3HDM1	chr2:135531454-135725270	Control	TC71	OK	23.0082	19.97	-0.204314	-0.332581	0.68675	0.997725	no
ENSG00000049089	ENSG00000049089	COL9A2	chr1:40300486-40317813	Control	TC71	OK	6.3637	0.551778	-3.52771	-3.98279	5e-05	0.018407	yes
ENSG00000049167	ENSG00000049167	ERCC8	chr5:60873830-60945073	Control	TC71	OK	9.85819	11.3451	0.202675	0.273891	0.74685	0.997725	no
ENSG00000049239	ENSG00000049239	H6PD	chr1:9234774-9271337	Control	TC71	OK	45.1031	35.5506	-0.343354	-0.954225	0.2569	0.997725	no
ENSG00000049245	ENSG00000049245	VAMP3	chr1:7771268-7781432	Control	TC71	OK	100.024	86.4089	-0.211099	-0.338104	0.6365	0.997725	no
ENSG00000049246	ENSG00000049246	PER3	chr1:7784319-7853512	Control	TC71	OK	34.6435	23.9393	-0.533203	-0.842195	0.25815	0.997725	no
ENSG00000049449	ENSG00000049449	RCN1	chr11:31509699-32105755	Control	TC71	OK	14.0672	18.7391	0.413716	0.686474	0.3479	0.997725	no
ENSG00000049541	ENSG00000049541	RFC2	chr7:74231498-74254458	Control	TC71	OK	6.78826	9.49196	0.483663	0.936409	0.2637	0.997725	no
ENSG00000049618	ENSG00000049618	ARID1B	chr6:156776359-157210779	Control	TC71	OK	57.5424	46.9618	-0.293139	-0.56525	0.45955	0.997725	no
ENSG00000049656	ENSG00000049656	CLPTM1L	chr5:1317743-1345099	Control	TC71	OK	38.9568	37.2337	-0.065263	-0.136789	0.85925	0.997725	no
ENSG00000049759	ENSG00000049759	NEDD4L	chr18:58044366-58401540	Control	TC71	OK	29.4865	41.1533	0.480954	0.915955	0.30525	0.997725	no
ENSG00000049860	ENSG00000049860	HEXB	chr5:74627405-74867854	Control	TC71	OK	690	636.678	-0.116032	-0.225019	0.787	0.997725	no
ENSG00000049883	ENSG00000049883	PTCD2	chr5:72219408-72368395	Control	TC71	OK	2.86472	2.56497	-0.159453	-0.129244	0.85205	0.997725	no
ENSG00000050130	ENSG00000050130	JKAMP	chr14:59429021-59576831	Control	TC71	OK	29.6233	35.2951	0.252734	0.535223	0.52565	0.997725	no
ENSG00000050344	ENSG00000050344	NFE2L3	chr7:26152239-26187125	Control	TC71	OK	7.77904	11.7971	0.600768	0.947148	0.12265	0.997725	no
ENSG00000050393	ENSG00000050393	MCUR1	chr6:13786556-13814568	Control	TC71	OK	5.05655	5.91367	0.225903	0.591926	0.48495	0.997725	no
ENSG00000050405	ENSG00000050405	LIMA1	chr12:50175787-50283546	Control	TC71	OK	21.9806	16.3635	-0.425744	-0.650746	0.35895	0.997725	no
ENSG00000050426	ENSG00000050426	LETMD1	chr12:51047961-51060424	Control	TC71	OK	34.2663	37.6564	0.136103	0.291774	0.72475	0.997725	no
ENSG00000050438	ENSG00000050438	SLC4A8	chr12:51351246-51515763	Control	TC71	OK	4.22076	3.83655	-0.137695	-0.0944881	0.877	0.997725	no
ENSG00000050730	ENSG00000050730	TNIP3	chr4:121131407-121227466	Control	TC71	OK	0.926644	17.7042	4.25593	5.35288	5e-05	0.018407	yes
ENSG00000050748	ENSG00000050748	MAPK9	chr5:180233142-180292099	Control	TC71	OK	11.067	11.0118	-0.00721357	-0.0127623	0.9856	0.997725	no
ENSG00000050820	ENSG00000050820	BCAR1	chr16:75218999-75268053	Control	TC71	OK	11.2126	4.20021	-1.41659	-1.85397	0.02215	0.945945	no
ENSG00000051009	ENSG00000051009	FAM160A2	chr11:6211334-6234711	Control	TC71	OK	17.3823	15.5864	-0.15733	-0.353476	0.6622	0.997725	no
ENSG00000051108	ENSG00000051108	HERPUD1	chr16:56932047-56944863	Control	TC71	OK	161.643	106.926	-0.596191	-1.33477	0.1223	0.997725	no
ENSG00000051128	ENSG00000051128	HOMER3	chr19:18899513-18946831	Control	TC71	OK	17.4607	10.4432	-0.741541	-0.704643	0.47085	0.997725	no
ENSG00000051382	ENSG00000051382	PIK3CB	chr3:138652698-138834938	Control	TC71	OK	46.3607	45.887	-0.0148148	-0.0228626	0.9791	0.997725	no
ENSG00000051523	ENSG00000051523	CYBA	chr16:88643282-88651152	Control	TC71	OK	290.261	162.658	-0.835507	-2.47402	0.0042	0.414063	no
ENSG00000051596	ENSG00000051596	THOC3	chr5:175906938-176034680	Control	TC71	OK	9.22695	11.2852	0.290508	0.439986	0.57645	0.997725	no
ENSG00000051620	ENSG00000051620	HEBP2	chr6:138402584-138697288	Control	TC71	OK	12.5134	8.15726	-0.61732	-0.429388	0.60105	0.997725	no
ENSG00000051825	ENSG00000051825	MPHOSPH9	chr12:123152319-123272334	Control	TC71	OK	16.2729	18.6126	0.193803	0.227753	0.78505	0.997725	no
ENSG00000052126	ENSG00000052126	PLEKHA5	chr12:19129751-19376400	Control	TC71	OK	4.44361	4.07938	-0.123381	-0.219456	0.7643	0.997725	no
ENSG00000052723	ENSG00000052723	SIKE1	chr1:114769478-114780685	Control	TC71	OK	11.3799	11.0308	-0.044948	-0.0486969	0.94755	0.997725	no
ENSG00000052749	ENSG00000052749	RRP12	chr10:97356357-97426076	Control	TC71	OK	15.9801	16.2705	0.0259809	0.0464477	0.9508	0.997725	no
ENSG00000052795	ENSG00000052795	FNIP2	chr4:158769137-159038760	Control	TC71	OK	55.6201	53.6462	-0.0521293	-0.102467	0.8743	0.997725	no
ENSG00000052802	ENSG00000052802	MSMO1	chr4:165327622-165343160	Control	TC71	OK	40.2255	52.0997	0.373164	0.959012	0.24675	0.997725	no
ENSG00000052841	ENSG00000052841	TTC17	chr11:43311962-43494933	Control	TC71	OK	79.5457	76.9595	-0.0476831	-0.0708132	0.9329	0.997725	no
ENSG00000053254	ENSG00000053254	FOXN3	chr14:89124870-89954777	Control	TC71	OK	49.3507	56.0108	0.182635	0.212232	0.57745	0.997725	no
ENSG00000053371	ENSG00000053371	AKR7A2	chr1:19303964-19312146	Control	TC71	OK	11.8832	11.0223	-0.108502	-0.249363	0.7697	0.997725	no
ENSG00000053372	ENSG00000053372	MRTO4	chr1:19210500-19260128	Control	TC71	OK	13.5673	21.6409	0.673627	0.744274	0.2404	0.997725	no
ENSG00000053438	ENSG00000053438	NNAT	chr20:37492471-37527931	Control	TC71	OK	2.88346	2.22865	-0.371632	-0.192363	0.81225	0.997725	no
ENSG00000053501	ENSG00000053501	USE1	chr19:17215345-17219829	Control	TC71	OK	18.5909	20.3883	0.133144	0.282492	0.73765	0.997725	no
ENSG00000053702	ENSG00000053702	NRIP2	chr12:1946053-2941140	Control	TC71	OK	2.85285	2.51439	-0.1822	-0.131448	0.8765	0.997725	no
ENSG00000053770	ENSG00000053770	AP5M1	chr14:57200506-57298742	Control	TC71	OK	32.2474	39.0958	0.277831	0.382384	0.63655	0.997725	no
ENSG00000053900	ENSG00000053900	ANAPC4	chr4:25377212-25418498	Control	TC71	OK	23.9265	19.5452	-0.291792	-0.423656	0.6102	0.997725	no
ENSG00000053918	ENSG00000053918	KCNQ1	chr11:2444683-2861568	Control	TC71	OK	10.2952	10.4684	0.0240731	0.0307467	0.9601	0.997725	no
ENSG00000054116	ENSG00000054116	TRAPPC3	chr1:36136569-36180849	Control	TC71	OK	32.1686	30.3679	-0.0831068	-0.111359	0.8901	0.997725	no
ENSG00000054118	ENSG00000054118	THRAP3	chr1:36224415-36305357	Control	TC71	OK	42.2281	35.4838	-0.251043	-0.767468	0.3441	0.997725	no
ENSG00000054148	ENSG00000054148	PHPT1	chr9:136844414-136860799	Control	TC71	OK	63.1697	99.9557	0.662055	1.47853	0.09225	0.997725	no
ENSG00000054219	ENSG00000054219	LY75	chr2:159712456-159904749	Control	TC71	OK	14.5779	15.2919	0.0689869	0.0766569	0.90925	0.997725	no
ENSG00000054267	ENSG00000054267	ARID4B	chr1:235131182-235504481	Control	TC71	OK	20.0424	20.1992	0.0112398	0.0105572	0.98645	0.997725	no
ENSG00000054277	ENSG00000054277	OPN3	chr1:241532133-241802133	Control	TC71	OK	26.7551	26.1379	-0.0336717	-0.0596171	0.939	0.997725	no
ENSG00000054282	ENSG00000054282	SDCCAG8	chr1:243256033-243851079	Control	TC71	OK	25.9216	23.6202	-0.134134	-0.175165	0.8317	0.997725	no
ENSG00000054523	ENSG00000054523	KIF1B	chr1:10210804-10381603	Control	TC71	OK	25.75	28.8092	0.161955	0.199079	0.68955	0.997725	no
ENSG00000054611	ENSG00000054611	TBC1D22A	chr22:46762616-47175699	Control	TC71	OK	31.8416	20.7852	-0.615354	-1.51746	0.05925	0.997725	no
ENSG00000054965	ENSG00000054965	FAM168A	chr11:73400486-73598189	Control	TC71	OK	15.6428	12.0558	-0.375772	-0.806769	0.21445	0.997725	no
ENSG00000054967	ENSG00000054967	RELT	chr11:73376263-73397474	Control	TC71	OK	28.543	22.0541	-0.372085	-0.769698	0.34335	0.997725	no
ENSG00000054983	ENSG00000054983	GALC	chr14:87710418-87993665	Control	TC71	OK	25.2163	24.1164	-0.0643392	-0.10564	0.89445	0.997725	no
ENSG00000055044	ENSG00000055044	NOP58	chr2:202265715-202303666	Control	TC71	OK	26.1247	33.9884	0.379628	0.85708	0.3187	0.997725	no
ENSG00000055070	ENSG00000055070	SZRD1	chr1:16352574-16437424	Control	TC71	OK	46.7445	45.1824	-0.0490379	-0.114783	0.88675	0.997725	no
ENSG00000055130	ENSG00000055130	CUL1	chr7:148696466-148801036	Control	TC71	OK	12.2837	14.6847	0.257567	0.728604	0.38915	0.997725	no
ENSG00000055147	ENSG00000055147	FAM114A2	chr5:153990127-154445850	Control	TC71	OK	22.0278	16.6436	-0.404353	-0.370215	0.65695	0.997725	no
ENSG00000055163	ENSG00000055163	CYFIP2	chr5:157260121-157575775	Control	TC71	OK	14.2385	14.4174	0.0180101	0.0265247	0.9747	0.997725	no
ENSG00000055208	ENSG00000055208	TAB2	chr6:149217925-149411613	Control	TC71	OK	40.0677	37.9696	-0.0775974	-0.189675	0.7793	0.997725	no
ENSG00000055211	ENSG00000055211	GINM1	chr6:149566293-149591748	Control	TC71	OK	12.8493	15.4095	0.262135	0.597387	0.47225	0.997725	no
ENSG00000055332	ENSG00000055332	EIF2AK2	chr2:37084450-37157065	Control	TC71	OK	14.413	9.77858	-0.559671	-0.509713	0.45275	0.997725	no
ENSG00000055483	ENSG00000055483	USP36	chr17:78787380-78841441	Control	TC71	OK	35.2322	36.3889	0.0466034	0.079691	0.92945	0.997725	no
ENSG00000055609	ENSG00000055609	KMT2C	chr7:152134921-152436005	Control	TC71	OK	63.825	50.6833	-0.332612	-0.310922	0.56455	0.997725	no
ENSG00000055732	ENSG00000055732	MCOLN3	chr1:84999146-85133138	Control	TC71	OK	14.2888	23.5331	0.719811	2.0434	0.01785	0.860915	no
ENSG00000055917	ENSG00000055917	PUM2	chr2:20248690-20352234	Control	TC71	OK	36.4549	35.3616	-0.0439295	-0.0680856	0.9277	0.997725	no
ENSG00000055950	ENSG00000055950	MRPL43	chr10:100969457-100994401	Control	TC71	OK	30.4133	29.7306	-0.0327565	-0.0681932	0.9353	0.997725	no
ENSG00000055955	ENSG00000055955	ITIH4	chr3:52812974-52897596	Control	TC71	OK	5.29564	4.30892	-0.297478	-0.16991	0.79285	0.997725	no
ENSG00000056050	ENSG00000056050	HPF1	chr4:169729464-169757953	Control	TC71	OK	2.68148	4.84164	0.852467	0.950239	0.2563	0.997725	no
ENSG00000056097	ENSG00000056097	ZFR	chr5:32354349-32444761	Control	TC71	OK	22.8917	24.9983	0.127006	0.253258	0.72725	0.997725	no
ENSG00000056558	ENSG00000056558	TRAF1	chr9:120902392-120929173	Control	TC71	OK	4.82427	18.0895	1.90677	5.19145	5e-05	0.018407	yes
ENSG00000056586	ENSG00000056586	RC3H2	chr9:122844555-122905341	Control	TC71	OK	23.453	17.7198	-0.404412	-0.494379	0.45025	0.997725	no
ENSG00000056736	ENSG00000056736	IL17RB	chr3:53846579-53865800	Control	TC71	OK	7.47824	7.14456	-0.0658542	-0.14601	0.86645	0.997725	no
ENSG00000056972	ENSG00000056972	TRAF3IP2	chr6:111299027-111606278	Control	TC71	OK	8.57726	7.70059	-0.155549	-0.115984	0.89835	0.997725	no
ENSG00000057019	ENSG00000057019	DCBLD2	chr3:98714329-98901689	Control	TC71	OK	3.50391	3.20867	-0.126987	-0.12583	0.8021	0.997725	no
ENSG00000057252	ENSG00000057252	SOAT1	chr1:179293713-179358680	Control	TC71	FAIL	65.7222	61.8209	0	0	1	1	no
ENSG00000057608	ENSG00000057608	GDI2	chr10:5765222-5842132	Control	TC71	OK	64.6467	78.9677	0.288686	0.918889	0.27475	0.997725	no
ENSG00000057657	ENSG00000057657	PRDM1	chr6:106045422-106325791	Control	TC71	OK	3.55755	5.80435	0.706251	0.574741	0.3643	0.997725	no
ENSG00000057663	ENSG00000057663	ATG5	chr6:106045422-106325791	Control	TC71	OK	15.0149	20.1451	0.424029	0.815502	0.32375	0.997725	no
ENSG00000057704	ENSG00000057704	TMCC3	chr12:94567123-94650562	Control	TC71	OK	6.65969	12.0176	0.851619	1.55859	0.01765	0.859381	no
ENSG00000057757	ENSG00000057757	PITHD1	chr1:23778404-23788232	Control	TC71	OK	17.8834	15.3888	-0.216746	-0.512007	0.5423	0.997725	no
ENSG00000057935	ENSG00000057935	MTA3	chr2:42494568-42756947	Control	TC71	OK	7.80256	11.6195	0.574531	0.770144	0.40735	0.997725	no
ENSG00000058063	ENSG00000058063	ATP11B	chr3:182793499-182921938	Control	TC71	OK	30.1994	30.4233	0.010659	0.0195119	0.97955	0.997725	no
ENSG00000058091	ENSG00000058091	CDK14	chr7:90335222-91210590	Control	TC71	OK	28.1143	28.469	0.018088	0.0212837	0.97925	0.997725	no
ENSG00000058262	ENSG00000058262	SEC61A1	chr3:128051640-128408646	Control	TC71	OK	89.3156	88.0959	-0.0198367	-0.057928	0.94105	0.997725	no
ENSG00000058272	ENSG00000058272	PPP1R12A	chr12:79574978-79942712	Control	TC71	OK	64.7999	81.2043	0.325565	0.608948	0.4777	0.997725	no
ENSG00000058453	ENSG00000058453	CROCC	chr1:16739937-16972979	Control	TC71	OK	4.56883	2.16529	-1.07727	-0.357256	0.45255	0.997725	no
ENSG00000058600	ENSG00000058600	POLR3E	chr16:22297374-22335103	Control	TC71	OK	6.60862	6.82848	0.0472155	0.0704099	0.9266	0.997725	no
ENSG00000058668	ENSG00000058668	ATP2B4	chr1:203626560-203744081	Control	TC71	OK	28.8876	13.2058	-1.12927	-1.10113	0.05805	0.997725	no
ENSG00000058673	ENSG00000058673	ZC3H11A	chr1:203795653-203854999	Control	TC71	OK	14.4158	15.8754	0.139136	0.125118	0.8479	0.997725	no
ENSG00000058729	ENSG00000058729	RIOK2	chr5:97089074-97437217	Control	TC71	OK	12.7966	16.33	0.351762	0.428911	0.6011	0.997725	no
ENSG00000058799	ENSG00000058799	YIPF1	chr1:53851718-53889834	Control	TC71	OK	11.2651	13.1777	0.226244	0.546977	0.51875	0.997725	no
ENSG00000058804	ENSG00000058804	NDC1	chr1:53765459-53838860	Control	TC71	OK	4.42412	6.17564	0.4812	1.21696	0.1412	0.997725	no
ENSG00000058866	ENSG00000058866	DGKG	chr3:186046307-186362237	Control	TC71	OK	5.18674	1.10118	-2.23578	-2.0672	0.0037	0.390901	no
ENSG00000059122	ENSG00000059122	FLYWCH1	chr16:2911936-2954276	Control	TC71	OK	10.9709	8.13154	-0.432083	-0.672259	0.335	0.997725	no
ENSG00000059145	ENSG00000059145	UNKL	chr16:1351922-1414751	Control	TC71	OK	11.0869	3.91587	-1.50145	-0.901924	0.1408	0.997725	no
ENSG00000059377	ENSG00000059377	TBXAS1	chr7:139561569-140020325	Control	TC71	OK	237.241	161.331	-0.556332	-0.629109	0.4915	0.997725	no
ENSG00000059378	ENSG00000059378	PARP12	chr7:140023743-140063721	Control	TC71	OK	123.382	99.6636	-0.30799	-0.656874	0.43375	0.997725	no
ENSG00000059588	ENSG00000059588	TARBP1	chr1:234391312-234479103	Control	TC71	OK	22.6449	22.3854	-0.0166288	-0.0208785	0.978	0.997725	no
ENSG00000059691	ENSG00000059691	GATB	chr4:151670503-151761023	Control	TC71	OK	22.3889	20.9469	-0.0960464	-0.199348	0.81985	0.997725	no
ENSG00000059728	ENSG00000059728	MXD1	chr2:69893559-69942945	Control	TC71	OK	12.8873	17.2868	0.423722	0.579278	0.478	0.997725	no
ENSG00000059758	ENSG00000059758	CDK17	chr12:96278260-96400560	Control	TC71	OK	34.4494	25.939	-0.409356	-0.713874	0.38835	0.997725	no
ENSG00000059769	ENSG00000059769	DNAJC25	chr9:111631351-111670246	Control	TC71	OK	3.71865	4.22993	0.185853	0.214834	0.79365	0.997725	no
ENSG00000059804	ENSG00000059804	SLC2A3	chr12:7919229-7936275	Control	TC71	OK	62.1638	71.869	0.209293	0.370112	0.65885	0.997725	no
ENSG00000060069	ENSG00000060069	CTDP1	chr18:79679800-79756623	Control	TC71	OK	10.0448	6.56006	-0.614668	-0.98382	0.1965	0.997725	no
ENSG00000060138	ENSG00000060138	YBX3	chr12:10699088-10723312	Control	TC71	OK	50.8799	71.0945	0.482643	1.02563	0.2252	0.997725	no
ENSG00000060237	ENSG00000060237	WNK1	chr12:752592-911452	Control	TC71	OK	146.267	118.712	-0.301139	-0.453382	0.5285	0.997725	no
ENSG00000060339	ENSG00000060339	CCAR1	chr10:68721011-68792377	Control	TC71	OK	53.7594	56.7012	0.0768627	0.133537	0.87175	0.997725	no
ENSG00000060491	ENSG00000060491	OGFR	chr20:62796452-62814000	Control	TC71	OK	39.4291	19.7778	-0.995377	-2.74733	0.0012	0.185636	no
ENSG00000060558	ENSG00000060558	GNA15	chr19:3136192-3163769	Control	TC71	OK	15.6799	15.8372	0.0144018	0.0376764	0.9658	0.997725	no
ENSG00000060642	ENSG00000060642	PIGV	chr1:26787471-26798398	Control	TC71	OK	8.77407	5.14645	-0.769669	-1.47191	0.0777	0.997725	no
ENSG00000060688	ENSG00000060688	SNRNP40	chr1:31259567-31296782	Control	TC71	OK	24.9089	18.4911	-0.429831	-0.807741	0.34245	0.997725	no
ENSG00000060749	ENSG00000060749	QSER1	chr11:32893177-32993316	Control	TC71	OK	20.2862	25.0638	0.305105	0.353865	0.51195	0.997725	no
ENSG00000060762	ENSG00000060762	MPC1	chr6:166364918-166383013	Control	TC71	OK	47.3738	44.0576	-0.104697	-0.260647	0.76005	0.997725	no
ENSG00000060971	ENSG00000060971	ACAA1	chr3:38039204-38137242	Control	TC71	OK	63.0224	40.3875	-0.641957	-1.50316	0.0781	0.997725	no
ENSG00000060982	ENSG00000060982	BCAT1	chr12:24810021-24960158	Control	TC71	OK	10.8686	29.8667	1.45838	1.38975	0.08555	0.997725	no
ENSG00000061273	ENSG00000061273	HDAC7	chr12:47706084-47837898	Control	TC71	OK	10.4207	8.82751	-0.239373	-0.170736	0.75795	0.997725	no
ENSG00000061676	ENSG00000061676	NCKAP1	chr2:182909114-183038858	Control	TC71	OK	0.700856	4.5865	2.71021	2.5162	0.0029	0.333362	no
ENSG00000061794	ENSG00000061794	MRPS35	chr12:27710772-27756295	Control	TC71	OK	30.3183	36.8618	0.281938	0.711996	0.37205	0.997725	no
ENSG00000061936	ENSG00000061936	SFSWAP	chr12:131711080-131799737	Control	TC71	OK	44.9145	30.0948	-0.577669	-0.829244	0.27345	0.997725	no
ENSG00000061938	ENSG00000061938	TNK2	chr3:195863363-195911945	Control	TC71	OK	37.8291	17.86	-1.08276	-2.08593	0.0117	0.688808	no
ENSG00000061987	ENSG00000061987	MON2	chr12:62466816-62600479	Control	TC71	OK	24.1055	25.7723	0.0964559	0.159116	0.82945	0.997725	no
ENSG00000062194	ENSG00000062194	GPBP1	chr5:57173947-57264679	Control	TC71	OK	21.9485	27.052	0.301616	0.581281	0.42995	0.997725	no
ENSG00000062370	ENSG00000062370	ZNF112	chr19:44326554-44448578	Control	TC71	OK	2.5617	2.56742	0.00322119	0.0033033	0.9958	0.998581	no
ENSG00000062485	ENSG00000062485	CS	chr12:56271698-56334053	Control	TC71	OK	65.9523	71.4828	0.116172	0.225797	0.7381	0.997725	no
ENSG00000062582	ENSG00000062582	MRPS24	chr7:43866557-43926411	Control	TC71	OK	34.9712	31.4741	-0.152	-0.241352	0.7738	0.997725	no
ENSG00000062598	ENSG00000062598	ELMO2	chr20:46364550-46496731	Control	TC71	OK	24.2371	21.623	-0.164652	-0.33263	0.6841	0.997725	no
ENSG00000062650	ENSG00000062650	WAPL	chr10:86435255-86521815	Control	TC71	FAIL	20.6366	24.8535	0	0	1	1	no
ENSG00000062716	ENSG00000062716	VMP1	chr17:59618552-59842255	Control	TC71	OK	281.822	382.003	0.438797	0.537947	0.37455	0.997725	no
ENSG00000062725	ENSG00000062725	APPBP2	chr17:60443148-60526219	Control	TC71	OK	13.1176	12.0028	-0.128142	-0.120009	0.86825	0.997725	no
ENSG00000062822	ENSG00000062822	POLD1	chr19:50384203-50431313	Control	TC71	OK	37.3573	28.3397	-0.398566	-0.770326	0.34245	0.997725	no
ENSG00000063046	ENSG00000063046	EIF4B	chr12:53006157-53079420	Control	TC71	OK	72.5651	63.1862	-0.199666	-0.391377	0.5155	0.997725	no
ENSG00000063169	ENSG00000063169	BICRA	chr19:47607523-47743134	Control	TC71	OK	4.79884	3.18688	-0.59054	-0.823918	0.22475	0.997725	no
ENSG00000063176	ENSG00000063176	SPHK2	chr19:48615327-48637438	Control	TC71	OK	11.3155	7.22981	-0.646269	-0.705916	0.4187	0.997725	no
ENSG00000063177	ENSG00000063177	RPL18	chr19:48615327-48637438	Control	TC71	OK	96.2656	86.8893	-0.147842	-0.274343	0.74255	0.997725	no
ENSG00000063180	ENSG00000063180	CA11	chr19:48637941-48682245	Control	TC71	OK	11.6593	10.6853	-0.12585	-0.179452	0.83045	0.997725	no
ENSG00000063241	ENSG00000063241	ISOC2	chr19:55452984-55462343	Control	TC71	OK	12.3096	7.87079	-0.645207	-1.25081	0.1551	0.997725	no
ENSG00000063244	ENSG00000063244	U2AF2	chr19:55654145-55674715	Control	TC71	OK	90.4655	71.6736	-0.335926	-0.691772	0.3871	0.997725	no
ENSG00000063245	ENSG00000063245	EPN1	chr19:55675225-55738402	Control	TC71	OK	37.0155	22.8767	-0.694248	-1.12815	0.1684	0.997725	no
ENSG00000063322	ENSG00000063322	MED29	chr19:39391302-39400637	Control	TC71	OK	13.2175	11.2409	-0.233698	-0.445401	0.56575	0.997725	no
ENSG00000063438	ENSG00000063438	AHRR	chr5:271620-438291	Control	TC71	OK	13.1453	12.5008	-0.0725302	-0.0787134	0.86905	0.997725	no
ENSG00000063601	ENSG00000063601	MTMR1	chrX:150692970-150765103	Control	TC71	OK	19.3842	12.3666	-0.648436	-0.897366	0.20865	0.997725	no
ENSG00000063761	ENSG00000063761	ADCK1	chr14:77800082-77935012	Control	TC71	OK	9.15985	6.65087	-0.46178	-0.820462	0.3218	0.997725	no
ENSG00000063854	ENSG00000063854	HAGH	chr16:1795619-1884294	Control	TC71	OK	29.7033	25.1673	-0.239073	-0.469603	0.57825	0.997725	no
ENSG00000063978	ENSG00000063978	RNF4	chr4:2418973-2732565	Control	TC71	OK	29.7916	27.4755	-0.116758	-0.184485	0.77335	0.997725	no
ENSG00000064012	ENSG00000064012	CASP8	chr2:201233442-201287711	Control	TC71	OK	38.5646	34.9991	-0.139961	-0.230802	0.754	0.997725	no
ENSG00000064102	ENSG00000064102	INTS13	chr12:26905180-26938326	Control	TC71	OK	19.006	21.6779	0.189769	0.278374	0.7516	0.997725	no
ENSG00000064115	ENSG00000064115	TM7SF3	chr12:26971585-27014434	Control	TC71	OK	94.8559	81.756	-0.214413	-0.41668	0.6297	0.997725	no
ENSG00000064201	ENSG00000064201	TSPAN32	chr11:2295644-2318200	Control	TC71	OK	33.9526	11.199	-1.60014	-1.83986	0.0171	0.840066	no
ENSG00000064225	ENSG00000064225	ST3GAL6	chr3:98714329-98901689	Control	TC71	OK	38.467	26.0086	-0.564632	-0.649241	0.4319	0.997725	no
ENSG00000064313	ENSG00000064313	TAF2	chr8:119730774-119832863	Control	TC71	OK	23.8761	23.1996	-0.0414697	-0.0552392	0.949	0.997725	no
ENSG00000064393	ENSG00000064393	HIPK2	chr7:139561569-140020325	Control	TC71	OK	59.7669	41.5998	-0.522769	-1.12438	0.15925	0.997725	no
ENSG00000064419	ENSG00000064419	TNPO3	chr7:128954179-129055173	Control	TC71	OK	19.9852	19.7797	-0.014915	-0.0447076	0.95975	0.997725	no
ENSG00000064490	ENSG00000064490	RFXANK	chr19:19145566-19203424	Control	TC71	OK	27.708	31.9729	0.206548	0.175931	0.8291	0.997725	no
ENSG00000064545	ENSG00000064545	TMEM161A	chr19:19119168-19138513	Control	TC71	OK	9.42502	6.97084	-0.435162	-0.545458	0.50415	0.997725	no
ENSG00000064547	ENSG00000064547	LPAR2	chr19:19623667-19628930	Control	TC71	OK	12.8132	10.0727	-0.347185	-0.531132	0.52945	0.997725	no
ENSG00000064601	ENSG00000064601	CTSA	chr20:45888624-45912155	Control	TC71	OK	482.619	271.294	-0.831029	-1.99385	0.0168	0.830943	no
ENSG00000064607	ENSG00000064607	SUGP2	chr19:18990887-19060311	Control	TC71	OK	32.44	26.4401	-0.295049	-0.622164	0.3254	0.997725	no
ENSG00000064651	ENSG00000064651	SLC12A2	chr5:128083765-128189688	Control	TC71	OK	2.27162	4.27878	0.913478	0.813602	0.26595	0.997725	no
ENSG00000064652	ENSG00000064652	SNX24	chr5:122843438-123054667	Control	TC71	OK	27.2177	21.5875	-0.334349	-0.451147	0.578	0.997725	no
ENSG00000064666	ENSG00000064666	CNN2	chr19:1026580-1039068	Control	TC71	OK	66.323	47.92	-0.468882	-0.836602	0.1882	0.997725	no
ENSG00000064687	ENSG00000064687	ABCA7	chr19:1040100-1065572	Control	TC71	OK	33.6695	24.9277	-0.433691	-0.685418	0.42135	0.997725	no
ENSG00000064703	ENSG00000064703	DDX20	chr1:111483347-111768016	Control	TC71	OK	5.58083	4.9572	-0.170955	-0.227588	0.77555	0.997725	no
ENSG00000064726	ENSG00000064726	BTBD1	chr15:82836945-83103443	Control	TC71	OK	41.6257	49.1752	0.240455	0.408157	0.6147	0.997725	no
ENSG00000064763	ENSG00000064763	FAR2	chr12:29149102-29381189	Control	TC71	OK	36.7015	28.4077	-0.369556	-0.506773	0.5392	0.997725	no
ENSG00000064886	ENSG00000064886	CHI3L2	chr1:111187173-111243440	Control	TC71	OK	5.15761	11.0297	1.09662	0.552743	0.24755	0.997725	no
ENSG00000064932	ENSG00000064932	SBNO2	chr19:1107635-1174283	Control	TC71	OK	14.0513	18.5873	0.403617	0.633226	0.4619	0.997725	no
ENSG00000064933	ENSG00000064933	PMS1	chr2:189770322-189877629	Control	TC71	OK	14.0538	14.4638	0.041484	0.0489911	0.9519	0.997725	no
ENSG00000064961	ENSG00000064961	HMG20B	chr19:3506272-3579088	Control	TC71	OK	152.635	94.8691	-0.686077	-0.792488	0.2868	0.997725	no
ENSG00000064995	ENSG00000064995	TAF11	chr6:34792014-34888089	Control	TC71	OK	11.2632	11.4189	0.0198007	0.0251679	0.9749	0.997725	no
ENSG00000064999	ENSG00000064999	ANKS1A	chr6:34889264-35091413	Control	TC71	OK	6.09336	4.50378	-0.436102	-0.908116	0.233	0.997725	no
ENSG00000065000	ENSG00000065000	AP3D1	chr19:2100987-2248679	Control	TC71	OK	86.9215	63.242	-0.45883	-0.712247	0.33645	0.997725	no
ENSG00000065029	ENSG00000065029	ZNF76	chr6:35258908-35295985	Control	TC71	OK	17.5833	15.0678	-0.222731	-0.443505	0.59315	0.997725	no
ENSG00000065057	ENSG00000065057	NTHL1	chr16:2039814-2135898	Control	TC71	OK	4.77952	3.06566	-0.640667	-0.264671	0.56845	0.997725	no
ENSG00000065060	ENSG00000065060	UHRF1BP1	chr6:34792014-34888089	Control	TC71	OK	7.3367	9.0155	0.297277	0.818974	0.3348	0.997725	no
ENSG00000065135	ENSG00000065135	GNAI3	chr1:109548610-109632051	Control	TC71	OK	3.75425	4.32368	0.203736	0.406753	0.62985	0.997725	no
ENSG00000065150	ENSG00000065150	IPO5	chr13:97953657-98024297	Control	TC71	OK	35.0576	45.9488	0.390301	0.621452	0.49045	0.997725	no
ENSG00000065154	ENSG00000065154	OAT	chr10:124397302-124418976	Control	TC71	OK	11.6922	14.5063	0.311136	0.574415	0.49	0.997725	no
ENSG00000065183	ENSG00000065183	WDR3	chr1:117929719-118185223	Control	TC71	OK	5.18026	5.64046	0.122788	0.121749	0.88275	0.997725	no
ENSG00000065243	ENSG00000065243	PKN2	chr1:87620802-88836255	Control	TC71	OK	18.0258	16.4492	-0.132043	-0.154577	0.84085	0.997725	no
ENSG00000065268	ENSG00000065268	WDR18	chr19:984270-998438	Control	TC71	OK	15.0328	7.58788	-0.986346	-1.56373	0.07005	0.997725	no
ENSG00000065308	ENSG00000065308	TRAM2	chr6:52361420-52576915	Control	TC71	OK	3.28393	3.72978	0.183666	0.285117	0.73525	0.997725	no
ENSG00000065357	ENSG00000065357	DGKA	chr12:55901412-55954027	Control	TC71	OK	9.32435	11.9023	0.352161	0.421599	0.55005	0.997725	no
ENSG00000065413	ENSG00000065413	ANKRD44	chr2:196967016-197311173	Control	TC71	OK	26.741	26.4408	-0.0162859	-0.0145288	0.98115	0.997725	no
ENSG00000065427	ENSG00000065427	KARS	chr16:75627473-75761872	Control	TC71	OK	57.0125	69.0306	0.275956	0.445834	0.60455	0.997725	no
ENSG00000065457	ENSG00000065457	ADAT1	chr16:75528531-75623300	Control	TC71	OK	31.9384	30.6449	-0.0596415	-0.0885118	0.92165	0.997725	no
ENSG00000065485	ENSG00000065485	PDIA5	chr3:123067061-123274130	Control	TC71	OK	3.08652	2.87669	-0.101569	-0.0921775	0.8967	0.997725	no
ENSG00000065491	ENSG00000065491	TBC1D22B	chr6:37212179-37332970	Control	TC71	OK	6.24799	5.57524	-0.16436	-0.395555	0.64745	0.997725	no
ENSG00000065518	ENSG00000065518	NDUFB4	chr3:120596308-120602500	Control	TC71	OK	99.2873	103.007	0.0530604	0.11717	0.8923	0.997725	no
ENSG00000065526	ENSG00000065526	SPEN	chr1:15834473-15940460	Control	TC71	OK	28.3189	33.5562	0.244811	0.41999	0.5802	0.997725	no
ENSG00000065548	ENSG00000065548	ZC3H15	chr2:186486155-186509363	Control	TC71	OK	44.0887	41.4274	-0.0898251	-0.207152	0.8076	0.997725	no
ENSG00000065559	ENSG00000065559	MAP2K4	chr17:11998352-12143830	Control	TC71	OK	8.96238	8.81651	-0.023675	-0.0446009	0.94835	0.997725	no
ENSG00000065600	ENSG00000065600	TMEM206	chr1:212363930-212414901	Control	TC71	OK	15.3976	16.2931	0.0815546	0.161241	0.83835	0.997725	no
ENSG00000065613	ENSG00000065613	SLK	chr10:103967200-104029233	Control	TC71	OK	21.1957	24.2828	0.196158	0.282326	0.72145	0.997725	no
ENSG00000065615	ENSG00000065615	CYB5R4	chr6:83859642-83967424	Control	TC71	OK	18.4476	23.6179	0.356448	0.568912	0.49795	0.997725	no
ENSG00000065665	ENSG00000065665	SEC61A2	chr10:12129636-12250589	Control	TC71	OK	3.06243	2.54533	-0.266824	-0.131665	0.8306	0.997725	no
ENSG00000065802	ENSG00000065802	ASB1	chr2:238426741-238452250	Control	TC71	OK	36.1365	21.8325	-0.726984	-1.06129	0.19725	0.997725	no
ENSG00000065809	ENSG00000065809	FAM107B	chr10:14518556-14774897	Control	TC71	OK	53.4737	50.527	-0.0817758	-0.158968	0.84025	0.997725	no
ENSG00000065833	ENSG00000065833	ME1	chr6:83210388-83431071	Control	TC71	OK	13.2177	23.1163	0.806437	2.28679	0.0078	0.542697	no
ENSG00000065882	ENSG00000065882	TBC1D1	chr4:37891086-38139175	Control	TC71	OK	154.54	127.308	-0.279658	-0.533334	0.5542	0.997725	no
ENSG00000065883	ENSG00000065883	CDK13	chr7:39947521-40099580	Control	TC71	OK	56.2188	53.9562	-0.0592629	-0.125913	0.8827	0.997725	no
ENSG00000065911	ENSG00000065911	MTHFD2	chr2:74198561-74421662	Control	TC71	OK	99.3233	123.199	0.31079	0.430945	0.57945	0.997725	no
ENSG00000065923	ENSG00000065923	SLC9A7	chrX:46599251-46759172	Control	TC71	OK	13.8364	11.5907	-0.255497	-0.445752	0.4391	0.997725	no
ENSG00000065970	ENSG00000065970	FOXJ2	chr12:8032702-8055503	Control	TC71	OK	10.6545	10.9914	0.0449128	0.127374	0.8814	0.997725	no
ENSG00000065978	ENSG00000065978	YBX1	chr1:42682426-42702349	Control	TC71	OK	266.311	183.323	-0.538721	-1.3587	0.1143	0.997725	no
ENSG00000065989	ENSG00000065989	PDE4A	chr19:10391133-10469631	Control	TC71	OK	14.9612	16.9998	0.18429	0.217479	0.76095	0.997725	no
ENSG00000066027	ENSG00000066027	PPP2R5A	chr1:212285536-212361863	Control	TC71	OK	20.9597	19.5195	-0.102701	-0.204062	0.802	0.997725	no
ENSG00000066044	ENSG00000066044	ELAVL1	chr19:7958578-8005659	Control	TC71	OK	31.0123	29.3734	-0.0783283	-0.180556	0.8289	0.997725	no
ENSG00000066084	ENSG00000066084	DIP2B	chr12:50504984-50748667	Control	TC71	OK	22.619	19.679	-0.200876	-0.237702	0.7165	0.997725	no
ENSG00000066117	ENSG00000066117	SMARCD1	chr12:50084971-50100712	Control	TC71	OK	20.5709	16.9105	-0.282683	-0.544023	0.4658	0.997725	no
ENSG00000066135	ENSG00000066135	KDM4A	chr1:43650148-43931165	Control	TC71	OK	15.975	15.2293	-0.0689634	-0.0938999	0.86475	0.997725	no
ENSG00000066136	ENSG00000066136	NFYC	chr1:40690379-40771603	Control	TC71	OK	27.6868	26.459	-0.0654404	-0.136704	0.8611	0.997725	no
ENSG00000066294	ENSG00000066294	CD84	chr1:160537072-160579516	Control	TC71	OK	86.0846	83.8019	-0.0387715	-0.063018	0.9338	0.997725	no
ENSG00000066322	ENSG00000066322	ELOVL1	chr1:43363396-43368074	Control	TC71	OK	52.3958	61.8091	0.238369	0.653528	0.4386	0.997725	no
ENSG00000066336	ENSG00000066336	SPI1	chr11:47354859-47378576	Control	TC71	OK	419.492	258.572	-0.698079	-2.18266	0.0099	0.619649	no
ENSG00000066422	ENSG00000066422	ZBTB11	chr3:101648888-101679217	Control	TC71	OK	11.1509	10.2325	-0.124	-0.227308	0.74055	0.997725	no
ENSG00000066427	ENSG00000066427	ATXN3	chr14:92044495-92106625	Control	TC71	OK	26.8881	18.4618	-0.542426	-0.838245	0.3076	0.997725	no
ENSG00000066455	ENSG00000066455	GOLGA5	chr14:92794230-92839963	Control	TC71	OK	18.0586	19.0359	0.0760306	0.14567	0.84915	0.997725	no
ENSG00000066557	ENSG00000066557	LRRC40	chr1:69568397-70205620	Control	TC71	OK	2.54287	3.39069	0.415124	0.688725	0.4228	0.997725	no
ENSG00000066583	ENSG00000066583	ISOC1	chr5:129094750-129114028	Control	TC71	OK	13.7901	12.4357	-0.14915	-0.320655	0.68545	0.997725	no
ENSG00000066651	ENSG00000066651	TRMT11	chr6:125986429-126039276	Control	TC71	OK	3.37993	3.97526	0.234055	0.308029	0.7125	0.997725	no
ENSG00000066654	ENSG00000066654	THUMPD1	chr16:20610242-20925006	Control	TC71	OK	20.8898	21.4618	0.0389743	0.0631719	0.93335	0.997725	no
ENSG00000066697	ENSG00000066697	MSANTD3	chr9:100427155-100577636	Control	TC71	FAIL	20.745	60.8096	0	0	1	1	no
ENSG00000066739	ENSG00000066739	ATG2B	chr14:96279201-96387288	Control	TC71	OK	12.1559	14.6909	0.273261	0.263844	0.70885	0.997725	no
ENSG00000066777	ENSG00000066777	ARFGEF1	chr8:66964098-67343677	Control	TC71	OK	31.5762	30.855	-0.0333343	-0.0553326	0.93895	0.997725	no
ENSG00000066827	ENSG00000066827	ZFAT	chr8:134477787-134713049	Control	TC71	OK	7.77098	7.44519	-0.0617886	-0.088531	0.9133	0.997725	no
ENSG00000066855	ENSG00000066855	MTFR1	chr8:65644733-65842322	Control	TC71	OK	14.8004	15.2363	0.0418767	0.0386815	0.96275	0.997725	no
ENSG00000066923	ENSG00000066923	STAG3	chr7:100177562-100272218	Control	TC71	OK	10.1925	5.22571	-0.96381	-1.15319	0.14655	0.997725	no
ENSG00000066926	ENSG00000066926	FECH	chr18:57548282-57586772	Control	TC71	OK	22.4555	18.286	-0.29633	-0.502066	0.5229	0.997725	no
ENSG00000066933	ENSG00000066933	MYO9A	chr15:71818395-72155459	Control	TC71	OK	18.9231	27.9402	0.562195	0.375726	0.47475	0.997725	no
ENSG00000067048	ENSG00000067048	DDX3Y	chrY:12904107-12920478	Control	TC71	OK	46.5917	47.5917	0.030638	0.0504293	0.9489	0.997725	no
ENSG00000067057	ENSG00000067057	PFKP	chr10:3066332-3172841	Control	TC71	OK	74.2214	70.234	-0.0796647	-0.11402	0.8862	0.997725	no
ENSG00000067064	ENSG00000067064	IDI1	chr10:971145-1049170	Control	TC71	OK	20.2287	20.5883	0.0254223	0.0447192	0.9567	0.997725	no
ENSG00000067066	ENSG00000067066	SP100	chr2:230415941-230580006	Control	TC71	OK	65.7007	60.5431	-0.117945	-0.214821	0.80065	0.997725	no
ENSG00000067082	ENSG00000067082	KLF6	chr10:3775995-3785281	Control	TC71	OK	71.0372	71.6636	0.0126641	0.0213826	0.97575	0.997725	no
ENSG00000067167	ENSG00000067167	TRAM1	chr8:70573441-70608387	Control	TC71	OK	56.6261	75.1127	0.40759	1.03556	0.20895	0.997725	no
ENSG00000067182	ENSG00000067182	TNFRSF1A	chr12:6328756-6342114	Control	TC71	OK	97.4971	88.1743	-0.145001	-0.34202	0.6809	0.997725	no
ENSG00000067191	ENSG00000067191	CACNB1	chr17:39173289-39197703	Control	TC71	OK	7.06283	5.49073	-0.363248	-0.392136	0.6548	0.997725	no
ENSG00000067208	ENSG00000067208	EVI5	chr1:92508695-92792404	Control	TC71	OK	26.7334	17.5735	-0.605245	-0.661827	0.37365	0.997725	no
ENSG00000067225	ENSG00000067225	PKM	chr15:72199028-72231822	Control	TC71	OK	1016.23	997.225	-0.0272436	-0.0612858	0.9403	0.997725	no
ENSG00000067248	ENSG00000067248	DHX29	chr5:55233933-55307722	Control	TC71	FAIL	8.03977	8.39571	0	0	1	1	no
ENSG00000067334	ENSG00000067334	DNTTIP2	chr1:93866282-93879918	Control	TC71	OK	36.7003	49.5654	0.433543	0.879745	0.27475	0.997725	no
ENSG00000067365	ENSG00000067365	METTL22	chr16:8621682-8649654	Control	TC71	OK	45.9216	32.039	-0.519344	-0.71025	0.4079	0.997725	no
ENSG00000067369	ENSG00000067369	TP53BP1	chr15:43358171-43510728	Control	TC71	OK	12.1363	11.859	-0.0333467	-0.0380253	0.9422	0.997725	no
ENSG00000067533	ENSG00000067533	RRP15	chr1:218285286-218337983	Control	TC71	OK	8.09824	9.86334	0.284468	0.30466	0.72045	0.997725	no
ENSG00000067560	ENSG00000067560	RHOA	chr3:49359144-49416475	Control	TC71	OK	367.567	360.366	-0.0285437	-0.0763299	0.9289	0.997725	no
ENSG00000067596	ENSG00000067596	DHX8	chr17:43483864-43610338	Control	TC71	OK	32.0938	28.7829	-0.15708	-0.126702	0.8116	0.997725	no
ENSG00000067646	ENSG00000067646	ZFY	chrY:2935280-3002626	Control	TC71	OK	7.42444	7.41532	-0.00177367	-0.00229487	0.99745	0.999249	no
ENSG00000067704	ENSG00000067704	IARS2	chr1:220094101-220148041	Control	TC71	OK	49.3519	42.8443	-0.204005	-0.326497	0.6808	0.997725	no
ENSG00000067829	ENSG00000067829	IDH3G	chrX:153785765-153798505	Control	TC71	OK	58.0177	53.7405	-0.110483	-0.224808	0.79385	0.997725	no
ENSG00000067836	ENSG00000067836	ROGDI	chr16:4796967-4802950	Control	TC71	OK	15.8929	9.6786	-0.715509	-1.48018	0.0582	0.997725	no
ENSG00000067900	ENSG00000067900	ROCK1	chr18:20946905-21111851	Control	TC71	OK	34.2313	45.7824	0.419475	0.61366	0.3734	0.997725	no
ENSG00000067955	ENSG00000067955	CBFB	chr16:67029115-67101058	Control	TC71	OK	36.7006	38.7003	0.0765392	0.0851342	0.90815	0.997725	no
ENSG00000067992	ENSG00000067992	PDK3	chrX:24465220-24539837	Control	TC71	OK	6.97523	5.19249	-0.425814	-0.62831	0.39145	0.997725	no
ENSG00000068001	ENSG00000068001	HYAL2	chr3:50317789-50328251	Control	TC71	OK	11.2624	10.485	-0.103192	-0.151659	0.8326	0.997725	no
ENSG00000068024	ENSG00000068024	HDAC4	chr2:239048167-239402364	Control	TC71	OK	13.8248	14.8767	0.105795	0.110921	0.89195	0.997725	no
ENSG00000068028	ENSG00000068028	RASSF1	chr3:50329781-50340980	Control	TC71	OK	24.8433	16.5052	-0.589933	-1.58642	0.06665	0.997725	no
ENSG00000068079	ENSG00000068079	IFI35	chr17:43006724-43014456	Control	TC71	OK	22.8488	16.7599	-0.447106	-0.845718	0.3145	0.997725	no
ENSG00000068097	ENSG00000068097	HEATR6	chr17:60043193-60078931	Control	TC71	OK	12.332	14.385	0.222156	0.354454	0.63985	0.997725	no
ENSG00000068120	ENSG00000068120	COASY	chr17:42536171-42566277	Control	TC71	OK	52.6594	45.7606	-0.202585	-0.272358	0.70835	0.997725	no
ENSG00000068305	ENSG00000068305	MEF2A	chr15:99565416-99733561	Control	TC71	OK	44.0979	40.0689	-0.138227	-0.255747	0.7462	0.997725	no
ENSG00000068308	ENSG00000068308	OTUD5	chrX:48922027-48958386	Control	TC71	OK	22.9538	18.6543	-0.299225	-0.724333	0.3905	0.997725	no
ENSG00000068323	ENSG00000068323	TFE3	chrX:49028725-49043486	Control	TC71	OK	21.8141	16.1836	-0.430728	-0.981763	0.18755	0.997725	no
ENSG00000068354	ENSG00000068354	TBC1D25	chrX:48539456-48562609	Control	TC71	OK	6.38269	5.26355	-0.278127	-0.408913	0.60925	0.997725	no
ENSG00000068366	ENSG00000068366	ACSL4	chrX:109623699-109733403	Control	TC71	OK	40.519	53.5096	0.4012	0.470646	0.55375	0.997725	no
ENSG00000068383	ENSG00000068383	INPP5A	chr10:132537819-132786052	Control	TC71	OK	6.21448	4.50978	-0.462577	-0.526423	0.513	0.997725	no
ENSG00000068394	ENSG00000068394	GPKOW	chrX:49113388-49123801	Control	TC71	OK	8.76119	9.84768	0.168657	0.401162	0.64265	0.997725	no
ENSG00000068400	ENSG00000068400	GRIPAP1	chrX:48973719-49002264	Control	TC71	OK	40.0239	30.1238	-0.409956	-0.670589	0.37005	0.997725	no
ENSG00000068438	ENSG00000068438	FTSJ1	chrX:48476020-48486364	Control	TC71	OK	14.6797	13.8523	-0.0836946	-0.158826	0.85655	0.997725	no
ENSG00000068489	ENSG00000068489	PRR11	chr17:59155498-59215247	Control	TC71	OK	7.41283	8.88818	0.261863	0.160494	0.77015	0.997725	no
ENSG00000068650	ENSG00000068650	ATP11A	chr13:112690328-112887168	Control	TC71	OK	60.6156	47.53	-0.350852	-0.451562	0.4616	0.997725	no
ENSG00000068654	ENSG00000068654	POLR1A	chr2:86020215-86106155	Control	TC71	OK	24.4472	28.4692	0.219731	0.193639	0.7907	0.997725	no
ENSG00000068697	ENSG00000068697	LAPTM4A	chr2:20032649-20052028	Control	TC71	OK	97.8231	114.194	0.223245	0.507065	0.5499	0.997725	no
ENSG00000068724	ENSG00000068724	TTC7A	chr2:46899274-47176601	Control	TC71	OK	22.231	16.5369	-0.42688	-0.367551	0.51945	0.997725	no
ENSG00000068745	ENSG00000068745	IP6K2	chr3:48688002-48740353	Control	TC71	OK	32.189	30.3666	-0.0840837	-0.190479	0.8134	0.997725	no
ENSG00000068784	ENSG00000068784	SRBD1	chr2:45388679-45612165	Control	TC71	OK	8.71206	12.8282	0.558228	0.977503	0.2264	0.997725	no
ENSG00000068796	ENSG00000068796	KIF2A	chr5:62306161-62628582	Control	TC71	OK	13.3508	13.2175	-0.0144787	-0.0218421	0.9768	0.997725	no
ENSG00000068878	ENSG00000068878	PSME4	chr2:53864066-54305300	Control	TC71	OK	23.0862	25.4543	0.140877	0.212283	0.754	0.997725	no
ENSG00000068885	ENSG00000068885	IFT80	chr3:160225495-160485773	Control	TC71	OK	3.48033	3.45338	-0.0112155	-0.00614094	0.9903	0.997725	no
ENSG00000068903	ENSG00000068903	SIRT2	chr19:38878554-38908893	Control	TC71	OK	11.4722	9.92928	-0.208386	-0.305221	0.68975	0.997725	no
ENSG00000068912	ENSG00000068912	ERLEC1	chr2:53532671-53860160	Control	TC71	OK	11.7454	12.084	0.0410014	0.0720946	0.9201	0.997725	no
ENSG00000068971	ENSG00000068971	PPP2R5B	chr11:64917552-64935888	Control	TC71	OK	4.83621	3.96609	-0.286159	-0.258299	0.76315	0.997725	no
ENSG00000069248	ENSG00000069248	NUP133	chr1:229440259-229508341	Control	TC71	OK	11.6498	9.35481	-0.316524	-0.569302	0.44635	0.997725	no
ENSG00000069275	ENSG00000069275	NUCKS1	chr1:205712818-205750276	Control	TC71	OK	134.518	125.848	-0.0961171	-0.0582677	0.93725	0.997725	no
ENSG00000069329	ENSG00000069329	VPS35	chr16:46656131-46689518	Control	TC71	OK	102.391	110.54	0.110479	0.225536	0.78665	0.997725	no
ENSG00000069345	ENSG00000069345	DNAJA2	chr16:46955361-46973788	Control	TC71	OK	38.4382	39.2194	0.0290275	0.0783462	0.92275	0.997725	no
ENSG00000069399	ENSG00000069399	BCL3	chr19:44747704-44760044	Control	TC71	OK	10.8684	32.9272	1.59915	2.92725	0.00095	0.154351	no
ENSG00000069424	ENSG00000069424	KCNAB2	chr1:5862810-6101193	Control	TC71	OK	229.386	144.589	-0.665821	-1.2231	0.1167	0.997725	no
ENSG00000069493	ENSG00000069493	CLEC2D	chr12:9664968-9699555	Control	TC71	OK	19.2714	40.9488	1.08736	1.54008	0.02885	0.997725	no
ENSG00000069509	ENSG00000069509	FUNDC1	chrX:44523638-44543001	Control	TC71	OK	3.96165	3.7045	-0.0968213	-0.157301	0.8582	0.997725	no
ENSG00000069812	ENSG00000069812	HES2	chr1:6412417-6424670	Control	TC71	OK	4.76947	0.749859	-2.66914	-3.66489	5e-05	0.018407	yes
ENSG00000069849	ENSG00000069849	ATP1B3	chr3:141876123-141926514	Control	TC71	OK	106.574	139.887	0.392411	1.15273	0.17325	0.997725	no
ENSG00000069943	ENSG00000069943	PIGB	chr15:55202965-55508234	Control	TC71	OK	10.9926	11.6045	0.0781449	0.0409289	0.92475	0.997725	no
ENSG00000069956	ENSG00000069956	MAPK6	chr15:51829627-52100523	Control	TC71	OK	20.5425	22.2412	0.114626	0.114199	0.8387	0.997725	no
ENSG00000069974	ENSG00000069974	RAB27A	chr15:55202965-55508234	Control	TC71	OK	14.592	17.0733	0.226564	0.157815	0.81835	0.997725	no
ENSG00000069998	ENSG00000069998	HDHD5	chr22:17137510-17165445	Control	TC71	OK	26.5417	27.2222	0.0365236	0.093323	0.90945	0.997725	no
ENSG00000070010	ENSG00000070010	UFD1	chr22:19330697-19479215	Control	TC71	OK	9.32968	8.05787	-0.211429	-0.229641	0.77585	0.997725	no
ENSG00000070047	ENSG00000070047	PHRF1	chr11:576485-612222	Control	TC71	OK	6.06007	4.70527	-0.365055	-0.712191	0.3108	0.997725	no
ENSG00000070061	ENSG00000070061	ELP1	chr9:108867516-108934116	Control	TC71	OK	5.92203	5.74897	-0.0427885	-0.0932866	0.9013	0.997725	no
ENSG00000070081	ENSG00000070081	NUCB2	chr11:17208152-17349980	Control	TC71	OK	13.1231	9.61247	-0.449125	-0.646028	0.4047	0.997725	no
ENSG00000070087	ENSG00000070087	PFN2	chr3:149761099-150225190	Control	TC71	OK	4.34897	3.76931	-0.206372	-0.0874967	0.86735	0.997725	no
ENSG00000070190	ENSG00000070190	DAPP1	chr4:99816832-99870154	Control	TC71	OK	8.45595	6.62693	-0.351627	-0.763739	0.35	0.997725	no
ENSG00000070214	ENSG00000070214	SLC44A1	chr9:105244621-105439171	Control	TC71	OK	11.2763	16.0417	0.508544	0.856278	0.2184	0.997725	no
ENSG00000070269	ENSG00000070269	TMEM260	chr14:56488353-56730535	Control	TC71	OK	12.1828	13.4986	0.14796	0.251728	0.74935	0.997725	no
ENSG00000070366	ENSG00000070366	SMG6	chr17:2054153-2381058	Control	TC71	OK	13.449	12.9432	-0.0553079	-0.0450842	0.92005	0.997725	no
ENSG00000070367	ENSG00000070367	EXOC5	chr14:57200506-57298742	Control	TC71	OK	18.8405	22.0567	0.227378	0.255995	0.72535	0.997725	no
ENSG00000070413	ENSG00000070413	DGCR2	chr22:19036281-19128449	Control	TC71	FAIL	18.4537	13.3136	0	0	1	1	no
ENSG00000070423	ENSG00000070423	RNF126	chr19:647525-663277	Control	TC71	OK	12.7046	6.38435	-0.992743	-1.80571	0.02705	0.997725	no
ENSG00000070444	ENSG00000070444	MNT	chr17:2384059-2401118	Control	TC71	OK	39.335	26.6593	-0.561174	-0.856091	0.2447	0.997725	no
ENSG00000070476	ENSG00000070476	ZXDC	chr3:126437600-126475919	Control	TC71	OK	19.1645	15.0579	-0.347919	-0.993963	0.23805	0.997725	no
ENSG00000070495	ENSG00000070495	JMJD6	chr17:76712831-76726799	Control	TC71	OK	14.0809	15.9513	0.17993	0.34905	0.6516	0.997725	no
ENSG00000070501	ENSG00000070501	POLB	chr8:42338453-42371808	Control	TC71	OK	13.3988	10.6368	-0.333036	-0.286275	0.78505	0.997725	no
ENSG00000070540	ENSG00000070540	WIPI1	chr17:68259181-68763882	Control	TC71	OK	13.9946	9.7403	-0.522834	-0.227729	0.63615	0.997725	no
ENSG00000070610	ENSG00000070610	GBA2	chr9:35696947-35749228	Control	TC71	OK	68.2861	63.9312	-0.0950733	-0.0755576	0.939	0.997725	no
ENSG00000070614	ENSG00000070614	NDST1	chr5:150475530-150558211	Control	TC71	OK	21.7873	16.0452	-0.441348	-0.592211	0.283	0.997725	no
ENSG00000070669	ENSG00000070669	ASNS	chr7:97851687-97972985	Control	TC71	OK	14.843	22.3442	0.590121	1.13965	0.17665	0.997725	no
ENSG00000070718	ENSG00000070718	AP3M2	chr8:42152945-42171673	Control	TC71	OK	16.5438	16.686	0.0123498	0.0180833	0.9825	0.997725	no
ENSG00000070731	ENSG00000070731	ST6GALNAC2	chr17:76557765-76586956	Control	TC71	OK	19.0343	11.8322	-0.685887	-0.499681	0.41615	0.997725	no
ENSG00000070756	ENSG00000070756	PABPC1	chr8:100685815-100722809	Control	TC71	OK	1097.31	899.608	-0.286603	-0.735255	0.37305	0.997725	no
ENSG00000070761	ENSG00000070761	CFAP20	chr16:58113587-58129450	Control	TC71	OK	12.1046	7.21629	-0.746221	-1.12395	0.1836	0.997725	no
ENSG00000070770	ENSG00000070770	CSNK2A2	chr16:58129528-58217805	Control	TC71	OK	37.268	33.3664	-0.159544	-0.36139	0.636	0.997725	no
ENSG00000070785	ENSG00000070785	EIF2B3	chr1:44850521-44986722	Control	TC71	OK	12.7264	11.8825	-0.0989785	-0.170984	0.8245	0.997725	no
ENSG00000070814	ENSG00000070814	TCOF1	chr5:150357638-150400308	Control	TC71	OK	13.3908	11.3754	-0.235335	-0.529186	0.4713	0.997725	no
ENSG00000070831	ENSG00000070831	CDC42	chr1:22052626-22092946	Control	TC71	OK	114.739	117.019	0.0283932	0.0918533	0.9172	0.997725	no
ENSG00000070882	ENSG00000070882	OSBPL3	chr7:24796538-24981634	Control	TC71	OK	22.1763	22.9429	0.0490324	0.0575586	0.9456	0.997725	no
ENSG00000070950	ENSG00000070950	RAD18	chr3:8619399-8963773	Control	TC71	OK	4.44418	6.45031	0.537452	0.711541	0.28125	0.997725	no
ENSG00000070961	ENSG00000070961	ATP2B1	chr12:89561128-89712590	Control	TC71	OK	43.1347	40.764	-0.0815538	-0.152455	0.85905	0.997725	no
ENSG00000071051	ENSG00000071051	NCK2	chr2:105744896-105894274	Control	TC71	OK	9.58731	9.8029	0.0320825	0.0499795	0.94685	0.997725	no
ENSG00000071054	ENSG00000071054	MAP4K4	chr2:101696849-101894689	Control	TC71	FAIL	217.352	149.987	0	0	1	1	no
ENSG00000071073	ENSG00000071073	MGAT4A	chr2:98619105-98731126	Control	TC71	OK	14.2467	10.254	-0.474441	-0.596995	0.4691	0.997725	no
ENSG00000071082	ENSG00000071082	RPL31	chr2:100820151-101270316	Control	TC71	OK	60.4607	60.4844	0.000567171	0.000505958	0.9995	0.999672	no
ENSG00000071127	ENSG00000071127	WDR1	chr4:10074338-10116949	Control	TC71	OK	168.08	143.763	-0.225457	-0.472133	0.51835	0.997725	no
ENSG00000071189	ENSG00000071189	SNX13	chr7:17790760-17940501	Control	TC71	OK	36.0424	35.643	-0.0160744	-0.0176946	0.98175	0.997725	no
ENSG00000071205	ENSG00000071205	ARHGAP10	chr4:147732062-148072780	Control	TC71	OK	38.2576	39.5956	0.0495941	0.0970236	0.8933	0.997725	no
ENSG00000071242	ENSG00000071242	RPS6KA2	chr6:166409363-166957191	Control	TC71	OK	30.3455	19.6707	-0.625435	-1.02882	0.20765	0.997725	no
ENSG00000071243	ENSG00000071243	ING3	chr7:120950748-120977216	Control	TC71	OK	6.64685	7.4161	0.157988	0.279094	0.7389	0.997725	no
ENSG00000071246	ENSG00000071246	VASH1	chr14:76762188-76826246	Control	TC71	OK	80.1636	61.4426	-0.383708	-0.680628	0.29915	0.997725	no
ENSG00000071462	ENSG00000071462	BUD23	chr7:73680968-73719672	Control	TC71	OK	29.195	27.8963	-0.0656508	-0.111436	0.89255	0.997725	no
ENSG00000071537	ENSG00000071537	SEL1L	chr14:81471548-81533861	Control	TC71	OK	91.3785	86.5139	-0.0789228	-0.110275	0.8837	0.997725	no
ENSG00000071553	ENSG00000071553	ATP6AP1	chrX:154428631-154436516	Control	TC71	OK	259.269	225.559	-0.200943	-0.551541	0.46585	0.997725	no
ENSG00000071564	ENSG00000071564	TCF3	chr19:1609289-1652605	Control	TC71	OK	21.7446	18.4463	-0.237324	-0.540097	0.50855	0.997725	no
ENSG00000071575	ENSG00000071575	TRIB2	chr2:12716888-12742734	Control	TC71	OK	8.81384	7.18516	-0.294751	-0.546139	0.50235	0.997725	no
ENSG00000071626	ENSG00000071626	DAZAP1	chr19:1407568-1435687	Control	TC71	OK	52.0231	39.2858	-0.405146	-0.900225	0.23375	0.997725	no
ENSG00000071655	ENSG00000071655	MBD3	chr19:1573595-1605490	Control	TC71	OK	41.6532	28.0766	-0.56906	-1.01192	0.17625	0.997725	no
ENSG00000071794	ENSG00000071794	HLTF	chr3:149030126-149102823	Control	TC71	OK	4.36436	3.00843	-0.536761	-0.647534	0.3249	0.997725	no
ENSG00000071859	ENSG00000071859	FAM50A	chrX:154444125-154450654	Control	TC71	OK	44.8675	35.4366	-0.340433	-0.684808	0.36605	0.997725	no
ENSG00000071889	ENSG00000071889	FAM3A	chrX:154506158-154516242	Control	TC71	OK	16.0373	11.1333	-0.526547	-0.866073	0.3134	0.997725	no
ENSG00000071894	ENSG00000071894	CPSF1	chr8:144373100-144409349	Control	TC71	OK	30.447	22.0204	-0.467458	-0.824543	0.38115	0.997725	no
ENSG00000071967	ENSG00000071967	CYBRD1	chr2:171522246-171558133	Control	TC71	OK	12.321	9.46927	-0.379793	-0.751661	0.31035	0.997725	no
ENSG00000071994	ENSG00000071994	PDCD2	chr6:170575294-170584692	Control	TC71	OK	17.3393	17.811	0.0387239	0.0761971	0.92655	0.997725	no
ENSG00000072042	ENSG00000072042	RDH11	chr14:67619797-67695814	Control	TC71	OK	37.9375	33.0434	-0.199263	-0.381598	0.6325	0.997725	no
ENSG00000072062	ENSG00000072062	PRKACA	chr19:14091687-14118084	Control	TC71	OK	79.4718	57.804	-0.459274	-0.885916	0.25025	0.997725	no
ENSG00000072071	ENSG00000072071	ADGRL1	chr19:14137178-14206187	Control	TC71	OK	7.42689	4.0052	-0.890882	-0.772165	0.37725	0.997725	no
ENSG00000072110	ENSG00000072110	ACTN1	chr14:68874142-68979440	Control	TC71	OK	228.206	193.21	-0.240168	-0.457115	0.5396	0.997725	no
ENSG00000072121	ENSG00000072121	ZFYVE26	chr14:67701885-67816590	Control	TC71	OK	107.974	56.7193	-0.928777	-0.956405	0.20285	0.997725	no
ENSG00000072134	ENSG00000072134	EPN2	chr17:19215614-19336715	Control	TC71	OK	23.8415	5.23114	-2.18828	-3.18117	5e-05	0.018407	yes
ENSG00000072135	ENSG00000072135	PTPN18	chr2:130356006-130375409	Control	TC71	OK	116.834	93.3272	-0.324093	-0.603215	0.43795	0.997725	no
ENSG00000072163	ENSG00000072163	LIMS2	chr2:127638380-127681786	Control	TC71	OK	5.62456	3.71839	-0.597062	-0.951583	0.2521	0.997725	no
ENSG00000072210	ENSG00000072210	ALDH3A2	chr17:19648135-19677598	Control	TC71	OK	102.917	117.245	0.188036	0.362943	0.67745	0.997725	no
ENSG00000072274	ENSG00000072274	TFRC	chr3:196027182-196082189	Control	TC71	FAIL	1530.16	1612.13	0	0	1	1	no
ENSG00000072310	ENSG00000072310	SREBF1	chr17:17681472-17837002	Control	TC71	OK	66.7433	73.0872	0.130997	0.206947	0.81405	0.997725	no
ENSG00000072364	ENSG00000072364	AFF4	chr5:132875378-132963634	Control	TC71	OK	65.3705	67.1373	0.0384756	0.0493346	0.95195	0.997725	no
ENSG00000072401	ENSG00000072401	UBE2D1	chr10:58334974-58370753	Control	TC71	OK	14.7195	18.5303	0.332161	0.63223	0.47755	0.997725	no
ENSG00000072415	ENSG00000072415	MPP5	chr14:67241108-67386516	Control	TC71	OK	7.96505	6.60628	-0.269846	-0.269483	0.7046	0.997725	no
ENSG00000072501	ENSG00000072501	SMC1A	chrX:53374148-53431120	Control	TC71	OK	47.7376	47.6245	-0.00342204	-0.00580217	0.99325	0.997917	no
ENSG00000072506	ENSG00000072506	HSD17B10	chrX:53431257-53434373	Control	TC71	OK	25.3974	27.9339	0.137338	0.317859	0.709	0.997725	no
ENSG00000072518	ENSG00000072518	MARK2	chr11:63838927-63911019	Control	TC71	OK	31.5454	27.6333	-0.19102	-0.32637	0.66395	0.997725	no
ENSG00000072609	ENSG00000072609	CHFR	chr12:132768908-132956306	Control	TC71	OK	102.634	67.6055	-0.602293	-0.623473	0.4986	0.997725	no
ENSG00000072682	ENSG00000072682	P4HA2	chr5:132184875-132395614	Control	TC71	OK	2.57891	3.68592	0.515264	0.29202	0.55315	0.997725	no
ENSG00000072694	ENSG00000072694	FCGR2B	chr1:161663146-161678654	Control	TC71	OK	137.852	131.762	-0.0651858	-0.192313	0.81985	0.997725	no
ENSG00000072736	ENSG00000072736	NFATC3	chr16:67987393-68238102	Control	TC71	OK	67.9911	49.8832	-0.446792	-0.723408	0.28955	0.997725	no
ENSG00000072756	ENSG00000072756	TRNT1	chr3:3126915-3179727	Control	TC71	OK	22.5881	20.5404	-0.137093	-0.128591	0.8671	0.997725	no
ENSG00000072778	ENSG00000072778	ACADVL	chr17:7189889-7225273	Control	TC71	OK	470.397	476.94	0.019929	0.0503107	0.9512	0.997725	no
ENSG00000072786	ENSG00000072786	STK10	chr5:172042072-172188386	Control	TC71	OK	117.584	81.1825	-0.534452	-0.930661	0.2092	0.997725	no
ENSG00000072803	ENSG00000072803	FBXW11	chr5:171861548-172006873	Control	TC71	OK	14.3821	13.7302	-0.0669216	-0.121504	0.8484	0.997725	no
ENSG00000072818	ENSG00000072818	ACAP1	chr17:7336528-7351478	Control	TC71	OK	16.8095	12.665	-0.408434	-0.535118	0.40855	0.997725	no
ENSG00000072840	ENSG00000072840	EVC	chr4:5711196-5893058	Control	TC71	OK	4.88241	5.41792	0.150147	0.177515	0.78585	0.997725	no
ENSG00000072849	ENSG00000072849	DERL2	chr17:5471250-5490814	Control	TC71	OK	29.3815	28.1009	-0.0642927	-0.084661	0.92185	0.997725	no
ENSG00000072864	ENSG00000072864	NDE1	chr16:15643266-15857033	Control	TC71	OK	6.62453	5.33069	-0.313494	-0.446546	0.58185	0.997725	no
ENSG00000072958	ENSG00000072958	AP1M1	chr19:16197577-16245907	Control	TC71	OK	64.2205	48.6917	-0.399358	-0.633052	0.43375	0.997725	no
ENSG00000073008	ENSG00000073008	PVR	chr19:44537057-44718759	Control	TC71	OK	10.4576	15.5484	0.572222	1.10483	0.15	0.997725	no
ENSG00000073050	ENSG00000073050	XRCC1	chr19:43543039-43596135	Control	TC71	OK	22.5176	17.1195	-0.395412	-0.482177	0.52765	0.997725	no
ENSG00000073060	ENSG00000073060	SCARB1	chr12:124776855-124882668	Control	TC71	OK	78.9282	44.0061	-0.842836	-2.00396	0.0134	0.740898	no
ENSG00000073111	ENSG00000073111	MCM2	chr3:127573068-127622436	Control	TC71	OK	5.30744	3.40836	-0.638939	-0.763552	0.2789	0.997725	no
ENSG00000073169	ENSG00000073169	SELENOO	chr22:50200978-50217616	Control	TC71	OK	7.31842	6.11246	-0.25978	-0.539977	0.52935	0.997725	no
ENSG00000073331	ENSG00000073331	ALPK1	chr4:112274541-112442620	Control	TC71	OK	60.894	65.0858	0.0960407	0.152741	0.84155	0.997725	no
ENSG00000073417	ENSG00000073417	PDE8A	chr15:84980439-85139145	Control	TC71	OK	52.2012	25.8683	-1.0129	-1.00618	0.08265	0.997725	no
ENSG00000073464	ENSG00000073464	CLCN4	chrX:10156944-10237660	Control	TC71	OK	7.02769	3.25667	-1.10966	-1.19862	0.0894	0.997725	no
ENSG00000073578	ENSG00000073578	SDHA	chr5:218240-256700	Control	TC71	OK	117.008	120.735	0.0452278	0.0944477	0.9115	0.997725	no
ENSG00000073584	ENSG00000073584	SMARCE1	chr17:40624961-40665181	Control	TC71	OK	21.3277	17.8973	-0.252987	-0.459788	0.52655	0.997725	no
ENSG00000073605	ENSG00000073605	GSDMB	chr17:39904594-39919854	Control	TC71	OK	3.01407	3.04319	0.0138714	0.0146252	0.98215	0.997725	no
ENSG00000073614	ENSG00000073614	KDM5A	chr12:280128-442645	Control	TC71	OK	76.9108	47.4936	-0.695453	-0.711648	0.4423	0.997725	no
ENSG00000073711	ENSG00000073711	PPP2R3A	chr3:135965672-136147891	Control	TC71	OK	2.85814	3.00157	0.0706419	0.119467	0.8566	0.997725	no
ENSG00000073737	ENSG00000073737	DHRS9	chr2:169064788-169096167	Control	TC71	OK	16.3682	11.0782	-0.56317	-1.05817	0.1957	0.997725	no
ENSG00000073792	ENSG00000073792	IGF2BP2	chr3:185643738-185825056	Control	TC71	OK	3.87968	5.52887	0.51105	0.651238	0.2159	0.997725	no
ENSG00000073803	ENSG00000073803	MAP3K13	chr3:185282940-185499057	Control	TC71	OK	6.13555	6.46726	0.0759626	0.0340688	0.965	0.997725	no
ENSG00000073849	ENSG00000073849	ST6GAL1	chr3:186930484-187078553	Control	TC71	OK	63.3359	65.7028	0.0529317	0.0960682	0.88425	0.997725	no
ENSG00000073905	ENSG00000073905	VDAC1P1	chrX:80929499-80930347	Control	TC71	OK	106.154	111.148	0.0663215	0.205927	0.80925	0.997725	no
ENSG00000073910	ENSG00000073910	FRY	chr13:31846712-32299122	Control	TC71	OK	14.9475	8.31848	-0.845509	-1.00238	0.1682	0.997725	no
ENSG00000073921	ENSG00000073921	PICALM	chr11:85957683-86069882	Control	TC71	OK	484.774	431.667	-0.167391	-0.245186	0.75035	0.997725	no
ENSG00000073969	ENSG00000073969	NSF	chr17:46590668-46757464	Control	TC71	OK	6.75044	6.19722	-0.123362	-0.171704	0.76915	0.997725	no
ENSG00000074054	ENSG00000074054	CLASP1	chr2:121337775-121649587	Control	TC71	FAIL	25.5804	24.077	0	0	1	1	no
ENSG00000074071	ENSG00000074071	MRPS34	chr16:1771889-1773155	Control	TC71	OK	56.7948	45.3151	-0.325767	-0.859545	0.3106	0.997725	no
ENSG00000074181	ENSG00000074181	NOTCH3	chr19:15159037-15200981	Control	TC71	OK	16.2709	15.7603	-0.0459987	-0.0651441	0.90975	0.997725	no
ENSG00000074201	ENSG00000074201	CLNS1A	chr11:77514935-77637805	Control	TC71	OK	48.8106	34.8417	-0.486379	-0.770982	0.3527	0.997725	no
ENSG00000074266	ENSG00000074266	EED	chr11:86244543-86278813	Control	TC71	OK	8.82298	10.4912	0.24984	0.478857	0.57235	0.997725	no
ENSG00000074319	ENSG00000074319	TSG101	chr11:18455823-18527232	Control	TC71	OK	40.0555	50.3263	0.329313	0.446817	0.598	0.997725	no
ENSG00000074356	ENSG00000074356	NCBP3	chr17:3802164-3846251	Control	TC71	OK	15.6225	16.5473	0.0829756	0.129946	0.87365	0.997725	no
ENSG00000074370	ENSG00000074370	ATP2A3	chr17:3923869-3964464	Control	TC71	OK	63.5913	41.6346	-0.611045	-1.2422	0.1104	0.997725	no
ENSG00000074416	ENSG00000074416	MGLL	chr3:127689061-127823250	Control	TC71	OK	149.752	77.0424	-0.958853	-1.89391	0.0112	0.668849	no
ENSG00000074582	ENSG00000074582	BCS1L	chr2:218637915-218663443	Control	TC71	OK	21.0002	22.8403	0.121182	0.164853	0.85485	0.997725	no
ENSG00000074603	ENSG00000074603	DPP8	chr15:65442462-65517704	Control	TC71	OK	18.5558	22.6503	0.287657	0.465443	0.5606	0.997725	no
ENSG00000074621	ENSG00000074621	SLC24A1	chr15:65611365-65891991	Control	TC71	OK	9.27969	8.74558	-0.0855238	-0.0675358	0.90455	0.997725	no
ENSG00000074657	ENSG00000074657	ZNF532	chr18:58862599-58986480	Control	TC71	OK	8.70955	10.1002	0.213717	0.29292	0.6873	0.997725	no
ENSG00000074660	ENSG00000074660	SCARF1	chr17:1633857-1645747	Control	TC71	OK	8.38619	8.89517	0.0850075	0.199497	0.8082	0.997725	no
ENSG00000074695	ENSG00000074695	LMAN1	chr18:59327822-59359962	Control	TC71	OK	40.5404	28.9915	-0.483732	-0.778515	0.3299	0.997725	no
ENSG00000074696	ENSG00000074696	HACD3	chr15:65530417-65578352	Control	TC71	OK	24.4176	29.2666	0.261331	0.541681	0.3929	0.997725	no
ENSG00000074755	ENSG00000074755	ZZEF1	chr17:4004444-4143020	Control	TC71	OK	64.8878	53.8778	-0.268259	-0.374868	0.6477	0.997725	no
ENSG00000074800	ENSG00000074800	ENO1	chr1:8860999-8879894	Control	TC71	FAIL	332.663	348.229	0	0	1	1	no
ENSG00000074842	ENSG00000074842	MYDGF	chr19:4639517-4670370	Control	TC71	OK	80.6004	49.0649	-0.716096	-1.20532	0.12555	0.997725	no
ENSG00000074855	ENSG00000074855	ANO8	chr19:17292130-17334829	Control	TC71	OK	5.11352	4.30709	-0.247605	-0.187067	0.8044	0.997725	no
ENSG00000074935	ENSG00000074935	TUBE1	chr6:112054071-112087529	Control	TC71	OK	6.93044	8.04471	0.215093	0.327632	0.70025	0.997725	no
ENSG00000074964	ENSG00000074964	ARHGEF10L	chr1:17539834-17697874	Control	TC71	OK	35.4221	31.2201	-0.182174	-0.283179	0.7287	0.997725	no
ENSG00000075089	ENSG00000075089	ACTR6	chr12:100156356-100267079	Control	TC71	OK	4.52306	8.66376	0.937695	1.25132	0.157	0.997725	no
ENSG00000075142	ENSG00000075142	SRI	chr7:88205117-88306891	Control	TC71	OK	20.8617	19.7981	-0.0754921	-0.151388	0.8603	0.997725	no
ENSG00000075151	ENSG00000075151	EIF4G3	chr1:20806291-21176888	Control	TC71	OK	46.2241	45.1851	-0.0327998	-0.0683617	0.9218	0.997725	no
ENSG00000075188	ENSG00000075188	NUP37	chr12:102063354-102120124	Control	TC71	OK	5.72167	10.4862	0.873986	1.37562	0.1092	0.997725	no
ENSG00000075223	ENSG00000075223	SEMA3C	chr7:80742537-80922359	Control	TC71	OK	85.6324	78.6151	-0.123351	-0.1742	0.83235	0.997725	no
ENSG00000075234	ENSG00000075234	TTC38	chr22:46267960-46294008	Control	TC71	OK	12.2012	10.9484	-0.156303	-0.230947	0.77195	0.997725	no
ENSG00000075239	ENSG00000075239	ACAT1	chr11:108008732-108147776	Control	TC71	OK	65.5149	69.4508	0.084169	0.126996	0.88385	0.997725	no
ENSG00000075240	ENSG00000075240	GRAMD4	chr22:46576011-46679790	Control	TC71	OK	36.7285	23.1985	-0.662868	-0.929126	0.11095	0.997725	no
ENSG00000075275	ENSG00000075275	CELSR1	chr22:46360833-46537170	Control	TC71	OK	11.6481	9.33245	-0.319771	-0.643827	0.37465	0.997725	no
ENSG00000075292	ENSG00000075292	ZNF638	chr2:71276560-71435069	Control	TC71	OK	70.1109	69.5904	-0.01075	-0.0195173	0.97805	0.997725	no
ENSG00000075303	ENSG00000075303	SLC25A40	chr7:87833567-87909541	Control	TC71	OK	49.1174	67.5148	0.458969	0.740088	0.39415	0.997725	no
ENSG00000075336	ENSG00000075336	TIMM21	chr18:74148510-74160530	Control	TC71	OK	25.767	27.1431	0.075063	0.169612	0.8366	0.997725	no
ENSG00000075391	ENSG00000075391	RASAL2	chr1:178094140-178499634	Control	TC71	OK	47.0738	52.1503	0.147751	0.224263	0.76535	0.997725	no
ENSG00000075399	ENSG00000075399	VPS9D1	chr16:89707133-89816657	Control	TC71	OK	8.28968	6.86535	-0.271983	-0.276806	0.70055	0.997725	no
ENSG00000075407	ENSG00000075407	ZNF37A	chr10:38094333-38378505	Control	TC71	OK	9.29529	11.4288	0.298106	0.414278	0.5593	0.997725	no
ENSG00000075413	ENSG00000075413	MARK3	chr14:103385391-103503831	Control	TC71	OK	62.3586	64.7717	0.0547752	0.119612	0.8825	0.997725	no
ENSG00000075415	ENSG00000075415	SLC25A3	chr12:98593590-98606379	Control	TC71	OK	272.874	219.784	-0.312151	-0.796765	0.3593	0.997725	no
ENSG00000075420	ENSG00000075420	FNDC3B	chr3:172039627-172401665	Control	TC71	OK	115.307	110.112	-0.0665102	-0.107666	0.9002	0.997725	no
ENSG00000075426	ENSG00000075426	FOSL2	chr2:28384408-28417312	Control	TC71	OK	32.8879	66.8508	1.02339	2.72127	0.00025	0.0692452	no
ENSG00000075539	ENSG00000075539	FRYL	chr4:48497360-48780322	Control	TC71	OK	35.9357	44.673	0.313986	0.337982	0.6851	0.997725	no
ENSG00000075568	ENSG00000075568	TMEM131	chr2:97756332-97995891	Control	TC71	OK	35.7346	31.718	-0.172019	-0.232488	0.74095	0.997725	no
ENSG00000075618	ENSG00000075618	FSCN1	chr7:5592822-5606655	Control	TC71	OK	3.04721	3.77538	0.309132	0.5936	0.45415	0.997725	no
ENSG00000075624	ENSG00000075624	ACTB	chr7:5527146-5563784	Control	TC71	OK	5258.3	3739.44	-0.491774	-0.890316	0.2615	0.997725	no
ENSG00000075651	ENSG00000075651	PLD1	chr3:171600404-171810950	Control	TC71	OK	39.823	43.1356	0.115276	0.0773698	0.87135	0.997725	no
ENSG00000075711	ENSG00000075711	DLG1	chr3:197042559-197303747	Control	TC71	OK	26.0165	25.9314	-0.00472918	-0.00884639	0.9909	0.997725	no
ENSG00000075785	ENSG00000075785	RAB7A	chr3:128726121-128814796	Control	TC71	OK	334.247	282.859	-0.24083	-0.502843	0.5382	0.997725	no
ENSG00000075790	ENSG00000075790	BCAP29	chr7:107579556-107629550	Control	TC71	OK	8.54643	8.21321	-0.0573771	-0.0722901	0.9364	0.997725	no
ENSG00000075826	ENSG00000075826	SEC31B	chr10:100486641-100559998	Control	TC71	OK	8.17525	3.32233	-1.29907	-0.730248	0.1907	0.997725	no
ENSG00000075856	ENSG00000075856	SART3	chr12:108515184-108561400	Control	TC71	OK	39.7779	42.7855	0.105156	0.178392	0.84285	0.997725	no
ENSG00000075884	ENSG00000075884	ARHGAP15	chr2:143091361-143776073	Control	TC71	OK	65.1462	56.4174	-0.207543	-0.374437	0.65815	0.997725	no
ENSG00000075914	ENSG00000075914	EXOSC7	chr3:44915256-45036071	Control	TC71	OK	28.6717	23.1531	-0.308424	-0.193305	0.67155	0.997725	no
ENSG00000075945	ENSG00000075945	KIFAP3	chr1:169921325-170085208	Control	TC71	OK	5.90343	5.7477	-0.0385677	-0.0453661	0.94885	0.997725	no
ENSG00000075975	ENSG00000075975	MKRN2	chr3:12484431-12664226	Control	TC71	OK	10.7212	9.31083	-0.203488	-0.259664	0.76715	0.997725	no
ENSG00000076003	ENSG00000076003	MCM6	chr2:135839625-135876426	Control	TC71	OK	8.84228	5.46427	-0.694388	-1.0691	0.1837	0.997725	no
ENSG00000076043	ENSG00000076043	REXO2	chr11:114391442-114450279	Control	TC71	OK	13.2598	15.1772	0.194848	0.248602	0.81615	0.997725	no
ENSG00000076053	ENSG00000076053	RBM7	chr11:114391442-114450279	Control	TC71	OK	12.089	11.1807	-0.112681	-0.170881	0.8398	0.997725	no
ENSG00000076067	ENSG00000076067	RBMS2	chr12:56521928-56636816	Control	TC71	OK	5.05394	4.63069	-0.126183	-0.0234531	0.86695	0.997725	no
ENSG00000076108	ENSG00000076108	BAZ2A	chr12:56521928-56636816	Control	TC71	OK	82.1451	73.5124	-0.160188	-0.245337	0.7834	0.997725	no
ENSG00000076201	ENSG00000076201	PTPN23	chr3:47381010-47413441	Control	TC71	OK	32.7773	26.4556	-0.309123	-0.275447	0.5488	0.997725	no
ENSG00000076242	ENSG00000076242	MLH1	chr3:36993331-37050918	Control	TC71	OK	33.5058	39.5567	0.239512	0.32238	0.6735	0.997725	no
ENSG00000076248	ENSG00000076248	UNG	chr12:109097573-109110992	Control	TC71	OK	5.12775	4.22572	-0.279129	-0.363659	0.61765	0.997725	no
ENSG00000076321	ENSG00000076321	KLHL20	chr1:173714940-173786702	Control	TC71	OK	13.9515	11.6669	-0.257997	-0.445417	0.5812	0.997725	no
ENSG00000076351	ENSG00000076351	SLC46A1	chr17:28357580-28407197	Control	TC71	OK	4.44877	2.89843	-0.618136	-0.388924	0.4573	0.997725	no
ENSG00000076356	ENSG00000076356	PLXNA2	chr1:208022241-208244320	Control	TC71	OK	19.0715	10.2123	-0.90111	-0.997095	0.18465	0.997725	no
ENSG00000076382	ENSG00000076382	SPAG5	chr17:28455751-28645454	Control	TC71	OK	5.0588	4.06905	-0.314104	-0.0612891	0.69225	0.997725	no
ENSG00000076513	ENSG00000076513	ANKRD13A	chr12:109999185-110073686	Control	TC71	OK	33.7198	25.8258	-0.384784	-0.814779	0.29325	0.997725	no
ENSG00000076554	ENSG00000076554	TPD52	chr8:79918716-80231232	Control	TC71	OK	3.27138	4.63344	0.502187	0.356178	0.586	0.997725	no
ENSG00000076555	ENSG00000076555	ACACB	chr12:109111217-109268226	Control	TC71	OK	16.515	12.1862	-0.438531	-0.46688	0.57085	0.997725	no
ENSG00000076604	ENSG00000076604	TRAF4	chr17:28743983-28750958	Control	TC71	OK	12.23	9.8611	-0.310607	-0.441139	0.59625	0.997725	no
ENSG00000076641	ENSG00000076641	PAG1	chr8:80967809-81112068	Control	TC71	OK	33.2605	31.1171	-0.0961031	-0.0742388	0.89205	0.997725	no
ENSG00000076650	ENSG00000076650	GPATCH1	chr19:33080879-33130542	Control	TC71	OK	6.76086	5.16032	-0.389745	-0.483262	0.54015	0.997725	no
ENSG00000076662	ENSG00000076662	ICAM3	chr19:10304802-10339823	Control	TC71	OK	10.2969	7.17255	-0.521648	-0.576795	0.4521	0.997725	no
ENSG00000076685	ENSG00000076685	NT5C2	chr10:102918292-103193306	Control	TC71	OK	57.1404	62.6629	0.133099	0.158768	0.82565	0.997725	no
ENSG00000076716	ENSG00000076716	GPC4	chrX:133300102-133415490	Control	TC71	OK	4.73034	3.2089	-0.559864	-1.4045	0.1022	0.997725	no
ENSG00000076770	ENSG00000076770	MBNL3	chrX:132203023-132489968	Control	TC71	FAIL	11.0212	9.04688	0	0	1	1	no
ENSG00000076864	ENSG00000076864	RAP1GAP	chr1:21596214-21669363	Control	TC71	OK	21.915	16.9697	-0.368961	-0.58362	0.3508	0.997725	no
ENSG00000076924	ENSG00000076924	XAB2	chr19:7619524-7629565	Control	TC71	OK	15.7115	15.4722	-0.0221415	-0.0442081	0.954	0.997725	no
ENSG00000076928	ENSG00000076928	ARHGEF1	chr19:41883160-41930150	Control	TC71	OK	110.498	94.5551	-0.224789	-0.430726	0.6208	0.997725	no
ENSG00000076944	ENSG00000076944	STXBP2	chr19:7629736-7647873	Control	TC71	OK	326.31	298.586	-0.128094	-0.322903	0.7152	0.997725	no
ENSG00000076984	ENSG00000076984	MAP2K7	chr19:7903842-7914478	Control	TC71	OK	33.5179	20.5199	-0.707907	-0.518431	0.1907	0.997725	no
ENSG00000077044	ENSG00000077044	DGKD	chr2:233354506-233472104	Control	TC71	OK	12.2353	14.0843	0.203045	0.23346	0.70245	0.997725	no
ENSG00000077097	ENSG00000077097	TOP2B	chr3:25174331-25664939	Control	TC71	OK	45.0909	44.6523	-0.0141013	-0.0245914	0.97075	0.997725	no
ENSG00000077147	ENSG00000077147	TM9SF3	chr10:96518108-96587452	Control	TC71	OK	63.7292	90.1953	0.501096	0.671447	0.42585	0.997725	no
ENSG00000077150	ENSG00000077150	NFKB2	chr10:102394109-102402529	Control	TC71	OK	18.2163	35.2253	0.951381	1.51289	0.07785	0.997725	no
ENSG00000077157	ENSG00000077157	PPP1R12B	chr1:202348698-202710417	Control	TC71	OK	14.8307	9.40592	-0.656944	-0.519048	0.34015	0.997725	no
ENSG00000077232	ENSG00000077232	DNAJC10	chr2:182716040-182794464	Control	TC71	OK	56.9425	93.3616	0.713322	1.28814	0.1242	0.997725	no
ENSG00000077235	ENSG00000077235	GTF3C1	chr16:27459554-27549913	Control	TC71	OK	32.3467	29.0761	-0.153787	-0.183973	0.81475	0.997725	no
ENSG00000077238	ENSG00000077238	IL4R	chr16:27313386-27364778	Control	TC71	OK	56.4802	45.1671	-0.322476	-0.60758	0.4003	0.997725	no
ENSG00000077254	ENSG00000077254	USP33	chr1:77695986-77759852	Control	TC71	OK	46.0144	41.7356	-0.140808	-0.258923	0.76675	0.997725	no
ENSG00000077312	ENSG00000077312	SNRPA	chr19:40691528-40765389	Control	TC71	OK	33.2069	27.4303	-0.275711	-0.421902	0.5706	0.997725	no
ENSG00000077348	ENSG00000077348	EXOSC5	chr19:41262495-41425005	Control	TC71	OK	10.6325	8.83163	-0.26773	-0.103904	0.88255	0.997725	no
ENSG00000077380	ENSG00000077380	DYNC1I2	chr2:171687408-171748420	Control	TC71	OK	21.426	17.6536	-0.279405	-0.5124	0.54435	0.997725	no
ENSG00000077420	ENSG00000077420	APBB1IP	chr10:26438202-26567803	Control	TC71	OK	37.8985	26.2796	-0.528199	-1.48451	0.07345	0.997725	no
ENSG00000077454	ENSG00000077454	LRCH4	chr7:100572227-100608175	Control	TC71	OK	51.5667	34.9646	-0.560542	-1.06898	0.21725	0.997725	no
ENSG00000077458	ENSG00000077458	FAM76B	chr11:95768941-95832693	Control	TC71	OK	9.91394	12.1883	0.29797	0.311474	0.7426	0.997725	no
ENSG00000077463	ENSG00000077463	SIRT6	chr19:4174108-4182604	Control	TC71	OK	12.7564	10.9993	-0.21381	-0.358031	0.6519	0.997725	no
ENSG00000077514	ENSG00000077514	POLD3	chr11:74491711-74669117	Control	TC71	OK	12.17	8.8675	-0.456733	-0.763561	0.3246	0.997725	no
ENSG00000077549	ENSG00000077549	CAPZB	chr1:19338775-19485539	Control	TC71	OK	136.5	120.879	-0.17533	-0.412158	0.6268	0.997725	no
ENSG00000077585	ENSG00000077585	GPR137B	chr1:236142504-236281985	Control	TC71	OK	38.982	40.5241	0.0559734	0.128194	0.87265	0.997725	no
ENSG00000077684	ENSG00000077684	JADE1	chr4:128809622-129116640	Control	TC71	OK	3.37809	3.76741	0.157366	0.242393	0.7373	0.997725	no
ENSG00000077713	ENSG00000077713	SLC25A43	chrX:119399059-119454478	Control	TC71	OK	17.0837	15.2064	-0.167941	-0.3687	0.6515	0.997725	no
ENSG00000077721	ENSG00000077721	UBE2A	chrX:119574466-119605895	Control	TC71	OK	40.6938	34.2752	-0.247643	-0.521489	0.5382	0.997725	no
ENSG00000077782	ENSG00000077782	FGFR1	chr8:38411137-38468834	Control	TC71	OK	26.5451	18.4754	-0.522844	-0.833817	0.281	0.997725	no
ENSG00000078043	ENSG00000078043	PIAS2	chr18:46803223-47102243	Control	TC71	OK	13.5418	10.9556	-0.305757	-0.409905	0.49195	0.997725	no
ENSG00000078061	ENSG00000078061	ARAF	chrX:47561099-47630305	Control	TC71	OK	38.7033	40.8181	0.0767555	0.121156	0.8771	0.997725	no
ENSG00000078070	ENSG00000078070	MCCC1	chr3:183015217-183116075	Control	TC71	OK	21.0117	12.3922	-0.761755	-0.836833	0.21345	0.997725	no
ENSG00000078081	ENSG00000078081	LAMP3	chr3:183122212-183163839	Control	TC71	OK	4.14354	15.4437	1.89808	4.13868	5e-05	0.018407	yes
ENSG00000078124	ENSG00000078124	ACER3	chr11:76860866-77026797	Control	TC71	OK	21.8644	22.4501	0.038134	0.0591372	0.9241	0.997725	no
ENSG00000078140	ENSG00000078140	UBE2K	chr4:39698043-39782792	Control	TC71	OK	38.6205	48.661	0.3334	0.577651	0.50605	0.997725	no
ENSG00000078142	ENSG00000078142	PIK3C3	chr18:41955205-42087830	Control	TC71	OK	36.1334	37.4998	0.0535517	0.0934655	0.9124	0.997725	no
ENSG00000078177	ENSG00000078177	N4BP2	chr4:40042916-40158252	Control	TC71	OK	5.45945	7.21256	0.401755	0.694309	0.32095	0.997725	no
ENSG00000078237	ENSG00000078237	TIGAR	chr12:4307762-4354593	Control	TC71	OK	17.7841	18.8071	0.0806906	0.233671	0.78585	0.997725	no
ENSG00000078269	ENSG00000078269	SYNJ2	chr6:157981886-158099176	Control	TC71	OK	7.75893	9.95085	0.358963	0.636644	0.42305	0.997725	no
ENSG00000078304	ENSG00000078304	PPP2R5C	chr14:101761797-101927989	Control	TC71	OK	48.559	61.0525	0.330313	0.517362	0.5228	0.997725	no
ENSG00000078369	ENSG00000078369	GNB1	chr1:1785284-1891117	Control	TC71	FAIL	141.561	132.331	0	0	1	1	no
ENSG00000078403	ENSG00000078403	MLLT10	chr10:21513477-21743630	Control	TC71	OK	39.8491	38.1839	-0.061582	-0.0612742	0.93895	0.997725	no
ENSG00000078487	ENSG00000078487	ZCWPW1	chr7:100400825-100434126	Control	TC71	OK	8.034	5.84927	-0.457863	-0.446335	0.63415	0.997725	no
ENSG00000078618	ENSG00000078618	NRDC	chr1:51561865-51878937	Control	TC71	OK	100.039	99.3905	-0.00938435	-0.0164066	0.9847	0.997725	no
ENSG00000078668	ENSG00000078668	VDAC3	chr8:42391623-42405897	Control	TC71	OK	36.9719	41.9879	0.183546	0.475667	0.562	0.997725	no
ENSG00000078674	ENSG00000078674	PCM1	chr8:17922839-18029944	Control	TC71	OK	195.142	159.2	-0.293684	-0.478542	0.57795	0.997725	no
ENSG00000078687	ENSG00000078687	TNRC6C	chr17:77959239-78142968	Control	TC71	OK	3.44147	5.46403	0.666941	0.218589	0.53735	0.997725	no
ENSG00000078699	ENSG00000078699	CBFA2T2	chr20:33490074-33650036	Control	TC71	OK	7.68208	6.5506	-0.229871	-0.537883	0.4751	0.997725	no
ENSG00000078747	ENSG00000078747	ITCH	chr20:34363234-34511393	Control	TC71	OK	80.2429	77.6196	-0.0479526	-0.0346383	0.9564	0.997725	no
ENSG00000078804	ENSG00000078804	TP53INP2	chr20:34560541-34825649	Control	TC71	OK	4.66023	6.52452	0.485471	0.320428	0.5186	0.997725	no
ENSG00000078808	ENSG00000078808	SDF4	chr1:1216907-1232031	Control	TC71	OK	102.936	90.3461	-0.188214	-0.481233	0.55725	0.997725	no
ENSG00000078902	ENSG00000078902	TOLLIP	chr11:1274370-1309654	Control	TC71	OK	36.489	28.843	-0.339242	-0.676204	0.3128	0.997725	no
ENSG00000078967	ENSG00000078967	UBE2D4	chr7:43926437-44019175	Control	TC71	OK	12.6793	13.2848	0.0673065	0.098899	0.8929	0.997725	no
ENSG00000079134	ENSG00000079134	THOC1	chr18:158382-268050	Control	TC71	OK	30.6114	28.2897	-0.113795	-0.160392	0.8564	0.997725	no
ENSG00000079215	ENSG00000079215	SLC1A3	chr5:36606354-36725195	Control	TC71	OK	104.717	125.984	0.26674	0.504446	0.5591	0.997725	no
ENSG00000079246	ENSG00000079246	XRCC5	chr2:216107463-216206303	Control	TC71	OK	181.916	175.307	-0.0533886	-0.109199	0.90295	0.997725	no
ENSG00000079263	ENSG00000079263	SP140	chr2:230121369-230313215	Control	TC71	OK	6.63699	5.7962	-0.195422	-0.158128	0.86415	0.997725	no
ENSG00000079277	ENSG00000079277	MKNK1	chr1:46538695-46616891	Control	TC71	OK	89.6783	73.641	-0.284249	-0.458331	0.60695	0.997725	no
ENSG00000079308	ENSG00000079308	TNS1	chr2:217799587-218010421	Control	TC71	OK	46.1315	18.2562	-1.33737	-2.07563	0.0014	0.205637	no
ENSG00000079313	ENSG00000079313	REXO1	chr19:1815245-1848463	Control	TC71	OK	18.3599	12.5699	-0.546582	-0.691904	0.25245	0.997725	no
ENSG00000079332	ENSG00000079332	SAR1A	chr10:70147288-70170523	Control	TC71	OK	24.2257	20.6572	-0.229891	-0.36209	0.60115	0.997725	no
ENSG00000079335	ENSG00000079335	CDC14A	chr1:100344476-100520278	Control	TC71	OK	4.65461	3.39925	-0.453445	-0.61999	0.49025	0.997725	no
ENSG00000079337	ENSG00000079337	RAPGEF3	chr12:47706084-47837898	Control	TC71	OK	15.2957	5.31023	-1.52628	-1.23327	0.03395	0.997725	no
ENSG00000079387	ENSG00000079387	SENP1	chr12:48042897-48146404	Control	TC71	OK	5.60155	6.5633	0.228596	0.222288	0.69975	0.997725	no
ENSG00000079432	ENSG00000079432	CIC	chr19:42268536-42295797	Control	TC71	OK	19.8512	13.1733	-0.591613	-0.867585	0.1351	0.997725	no
ENSG00000079459	ENSG00000079459	FDFT1	chr8:11795572-11839309	Control	TC71	OK	47.2389	43.5455	-0.11745	-0.234773	0.7899	0.997725	no
ENSG00000079462	ENSG00000079462	PAFAH1B3	chr19:42297032-42310821	Control	TC71	OK	4.69355	3.60735	-0.379741	-0.556908	0.50555	0.997725	no
ENSG00000079482	ENSG00000079482	OPHN1	chrX:68042343-68433913	Control	TC71	OK	2.24595	4.05711	0.853124	0.0818672	0.4698	0.997725	no
ENSG00000079616	ENSG00000079616	KIF22	chr16:29790718-29805385	Control	TC71	OK	9.64958	9.98389	0.0491355	0.109879	0.8963	0.997725	no
ENSG00000079739	ENSG00000079739	PGM1	chr1:63440769-63660245	Control	TC71	OK	7.58437	4.82109	-0.653671	-1.04842	0.1461	0.997725	no
ENSG00000079785	ENSG00000079785	DDX1	chr2:15591177-15631111	Control	TC71	OK	26.4855	30.8682	0.22092	0.421746	0.61175	0.997725	no
ENSG00000079805	ENSG00000079805	DNM2	chr19:10718078-10836318	Control	TC71	OK	146.401	110.79	-0.402101	-0.697227	0.41145	0.997725	no
ENSG00000079819	ENSG00000079819	EPB41L2	chr6:130839346-131063322	Control	TC71	OK	59.5222	47.6103	-0.322154	-0.5736	0.4962	0.997725	no
ENSG00000079950	ENSG00000079950	STX7	chr6:132445866-132513198	Control	TC71	OK	41.097	38.3386	-0.100234	-0.118304	0.8837	0.997725	no
ENSG00000079974	ENSG00000079974	RABL2B	chr22:50756947-50801309	Control	TC71	OK	18.3902	13.3827	-0.458566	-0.663525	0.36035	0.997725	no
ENSG00000079999	ENSG00000079999	KEAP1	chr19:10486119-10503741	Control	TC71	OK	43.4838	50.8503	0.225778	0.4217	0.6223	0.997725	no
ENSG00000080189	ENSG00000080189	SLC35C2	chr20:46345979-46364458	Control	TC71	OK	20.0605	18.9057	-0.085531	-0.17523	0.8307	0.997725	no
ENSG00000080200	ENSG00000080200	CRYBG3	chr3:97822039-97972457	Control	TC71	OK	9.29871	11.1859	0.266585	0.789587	0.36075	0.997725	no
ENSG00000080298	ENSG00000080298	RFX3	chr9:3218296-3526004	Control	TC71	OK	8.1289	6.18936	-0.39327	-0.402228	0.6046	0.997725	no
ENSG00000080345	ENSG00000080345	RIF1	chr2:151409882-151734487	Control	TC71	OK	18.9978	21.7207	0.193241	0.270761	0.64355	0.997725	no
ENSG00000080371	ENSG00000080371	RAB21	chr12:71754873-71800285	Control	TC71	OK	31.8956	32.4931	0.0267787	0.0364531	0.96195	0.997725	no
ENSG00000080503	ENSG00000080503	SMARCA2	chr9:1980289-2193624	Control	TC71	OK	106.378	76.1182	-0.482885	-0.888093	0.315	0.997725	no
ENSG00000080546	ENSG00000080546	SESN1	chr6:108986436-109094819	Control	TC71	OK	13.2353	11.5389	-0.197894	-0.317092	0.6982	0.997725	no
ENSG00000080561	ENSG00000080561	MID2	chrX:107825754-107935980	Control	TC71	OK	12.1612	8.42401	-0.529704	-0.856813	0.29175	0.997725	no
ENSG00000080603	ENSG00000080603	SRCAP	chr16:30697706-30776307	Control	TC71	OK	39.2116	28.9917	-0.435644	-0.588653	0.32015	0.997725	no
[truncated: 14,674 more rows]

## Sheet: cuffnorm
tracking_id	CONTROL1	CONTROL2	TC32	TC71
DPM1	4.04987	0	2.01244	1.47858
[truncated: 20,295 more rows]
