# Supplementary material for: Ewing Sarcoma-Derived Extracellular Vesicles Impair Dendritic Cell Maturation and Function
Source: Cells. 2021 Aug 13;10(8):2081. doi: 10.3390/cells10082081 (PMC8391167; doi:10.3390/cells10082081)
Supplement: Supplementary file 1 [file cells-10-02081-s001.zip › Supplementary Table 2_Gene List M1, M2 macrophages, DCs.xlsx]

## Sheet: Cytokines, Chemokines
Symbol	Gene Name	Entrez ID	Reported Expression	Reference	Source
IL-1a	Interleukin 1, alpha; IL-1A	3552	M1	4	Stewart DA et al 2012, Kratochvill et al 2015_M1 and M2 genes
IL-1b	Interleukin 1, beta; IL1F2	3553	M1 & M2	8	Stewart DA et al 2012, Kratochvill et al 2015_M1 and M2 genes
IL-6	Interleukin 6 (interferon, beta 2), HGF	3569	M1	4	Stewart DA et al 2012, Kratochvill et al 2015_M1 and M2 genes
IL-8	Interleukin 8, C-X-C motif chemokine 8, T-cell chemotactic factor; beta-thromboglobulin-like protein	3576	M1	4	Stewart DA et al 2012, Kratochvill et al 2015_M1 and M2 genes
TNF-a	Tumor necrosis factor (superfamily member 2), DIF	7124	M1	7	Stewart DA et al 2012, Kratochvill et al 2015_M1 and M2 genes
IL-10	Interleukin 10A	3586	M1	4	Stewart DA et al 2012, Kratochvill et al 2015_M1 and M2 genes
IL-12	Interleukin 12A, p35	3592	M1	4	Stewart DA et al 2012, Kratochvill et al 2015_M1 and M2 genes
IL12B	Interleukin 12B (cytotoxic lymphocyte maturation factor 2, p40)	3593	M1	2	Stewart DA et al 2012, Kratochvill et al 2015_M1 and M2 genes
IL15	Interleukin 15	3600	M1	2	Stewart DA et al 2012, Kratochvill et al 2015_M1 and M2 genes
IL-23	Interleukin 23, alpha; P19	51561	M1	9	Stewart DA et al 2012, Kratochvill et al 2015_M1 and M2 genes
CCL1	Chemokine(C-C motif) ligand 1	6346	M2	4	Stewart DA et al 2012, Kratochvill et al 2015_M1 and M2 genes
CCL11	Chemokine ligand 11, Eotaxin	6356	M1	4	Stewart DA et al 2012, Kratochvill et al 2015_M1 and M2 genes
CCL17	Chemokine ligand17, TARC	6361	M1 & M2	4	Stewart DA et al 2012, Kratochvill et al 2015_M1 and M2 genes
CCL18	Chemokine ligand 18, MIP-4	6362	M2	4	Stewart DA et al 2012, Kratochvill et al 2015_M1 and M2 genes
CCL19	Chemokine ligand 19, MIP-3B	6363	M1	2	Stewart DA et al 2012, Kratochvill et al 2015_M1 and M2 genes
CCL2	Chemokine ligand 2, MCP1, GDCF-2	6347	Macrophage	2	Stewart DA et al 2012, Kratochvill et al 2015_M1 and M2 genes
CCL21	Chemokine ligand 21
CCL22	Chemokine ligand 22, MDC	6367	M2	7	Stewart DA et al 2012, Kratochvill et al 2015_M1 and M2 genes
CCL24	Chemokine ligand 24	6369	M2	4	Stewart DA et al 2012, Kratochvill et al 2015_M1 and M2 genes
CCL3	Chemokine ligand 3, MIP-1A	6348	M1	4	Stewart DA et al 2012, Kratochvill et al 2015_M1 and M2 genes
CCL4	Chemokine ligand 4, MIP-1B	6351	M1	4	Stewart DA et al 2012, Kratochvill et al 2015_M1 and M2 genes
CCL5	Chemokine ligand 5, RANTES	6352	M1	4	Stewart DA et al 2012, Kratochvill et al 2015_M1 and M2 genes
CXCL2	Chemokine ligand 2	2920	M1	4	Stewart DA et al 2012, Kratochvill et al 2015_M1 and M2 genes
CXCL3	Chemokine (C-X-C motif) ligand 3	2921	M1	4	Stewart DA et al 2012, Kratochvill et al 2015_M1 and M2 genes
CXCL5	Chemokine ligand 5, ENA-78	6374	M1	4	Stewart DA et al 2012, Kratochvill et al 2015_M1 and M2 genes
TGFBI	Transforming growth factor, beta-induced, 68kDa	7045	M2	9	Stewart DA et al 2012, Kratochvill et al 2015_M1 and M2 genes

## Sheet: Surface molecules
Symbol	Gene Name	Entrez ID	Reported Expression	Reference	Source
IL-4RA	Interleukin 4 receptor subunit alpha	3566	M2	3	Stewart DA et al 2012, Kratochvill et al 2015_M1 and M2 genes
IL-7R	Interleukin 7 receptor, CD127	3575	M1	2	Stewart DA et al 2012, Kratochvill et al 2015_M1 and M2 genes
IL-27RA	Interleukin 27 receptor, alpha	9466	M2	13	Stewart DA et al 2012, Kratochvill et al 2015_M1 and M2 genes
CCR1	Chemokine (C-C motif) receptor 1	1230	M1 & M2	4	Stewart DA et al 2012, Kratochvill et al 2015_M1 and M2 genes
CCR2	Chemokine receptor 2	1231	Monocyte	4	Stewart DA et al 2012, Kratochvill et al 2015_M1 and M2 genes
CCR3	Chemokine receptor 3, CD193	1232	M1 & M2	8	Stewart DA et al 2012, Kratochvill et al 2015_M1 and M2 genes
CCR7	Chemokine receptor 7, CD197	1236	M1	8	Stewart DA et al 2012, Kratochvill et al 2015_M1 and M2 genes
CXCR1	Chemokine (C-X-C motif) receptor 1	3577	M2	-9
CXCR2	Chemokine receptor 2, CD182, IL8RA	3579	M2	-9
CXCR4	Chemokine receptor 4, CD184	7852	M2	-4
CD115	CSF-1R	1436	M2	8	Stewart DA et al 2012, Kratochvill et al 2015_M1 and M2 genes
CD14	Monocyte differentiation antigen CD14; myeloid cell-specific	929	Monocyte, M2	9	Stewart DA et al 2012, Kratochvill et al 2015_M1 and M2 genes
CD163	CD163 molecule	9332	M2	10	Stewart DA et al 2012, Kratochvill et al 2015_M1 and M2 genes
CD204	Macrophage scavenger receptor 1, MSR1	4481	M2	1	Stewart DA et al 2012, Kratochvill et al 2015_M1 and M2 genes
MRC1	CD206, Mannose receptor C type 1, MRC1	4360	M2	4	Stewart DA et al 2012, Kratochvill et al 2015_M1 and M2 genes
CD36	Leukocyte differentiation antigen	948	M2	2	Stewart DA et al 2012, Kratochvill et al 2015_M1 and M2 genes
CD44	CD44 molecule	960	Macrophage	11	Stewart DA et al 2012, Kratochvill et al 2015_M1 and M2 genes
CD47	CD47 antigen (Rh-related antigen, integrin-associated signal transducer)	961	M1	3	Stewart DA et al 2012, Kratochvill et al 2015_M1 and M2 genes
CD74	CD74 molecule, Major histocompatibility complex, class II invariant chain	972	M1	7	Stewart DA et al 2012, Kratochvill et al 2015_M1 and M2 genes
CD80	CD28LG, B-lymphocyte activation antigen B7	941	M1	7	Stewart DA et al 2012, Kratochvill et al 2015_M1 and M2 genes
CD83	CD83 molecule	9308	Monocyte	2	Stewart DA et al 2012, Kratochvill et al 2015_M1 and M2 genes
CD86	CD86 molecule, CD28LG2	942	M1	7	Stewart DA et al 2012, Kratochvill et al 2015_M1 and M2 genes
DCL-1	CD302 molecule	9936	M2	2	Stewart DA et al 2012, Kratochvill et al 2015_M1 and M2 genes
DCSIGN	CD209 molecule	30835	M2	2	Stewart DA et al 2012, Kratochvill et al 2015_M1 and M2 genes
CD274	PD-L1
HLA-DRA	Major histocompatibility complex, class II, DR alpha	3122	Monocyte	2	Stewart DA et al 2012, Kratochvill et al 2015_M1 and M2 genes
HLA-DRB1	Major histocompatibility complex, class II, DR beta 1	3123	Monocyte	2	Stewart DA et al 2012, Kratochvill et al 2015_M1 and M2 genes
HLA-DRB5
HLA-DRB6
HLA-DRB9
TGFBR2	Transforming growth factor, beta receptor II (70/80kDa)	7048	M2	9	Stewart DA et al 2012, Kratochvill et al 2015_M1 and M2 genes
LAMP3

## Sheet: TLRs
Symbol	Gene Name	Entrez ID	Reported Expression	Reference	Source
TLR1	Toll-like receptor 1	7096	M2	9	Stewart DA et al 2012, Kratochvill et al 2015_M1 and M2 genes
TLR2	Toll-like receptor 2, CD282	7097	M1	9	Stewart DA et al 2012, Kratochvill et al 2015_M1 and M2 genes
TLR3	Toll-like receptor 3	7098	M2	9	Stewart DA et al 2012, Kratochvill et al 2015_M1 and M2 genes
TLR4	Toll-like receptor 4, CD284,	7099	M1	9	Stewart DA et al 2012, Kratochvill et al 2015_M1 and M2 genes
TLR5	Toll-like receptor 5	7100	M2	9	Stewart DA et al 2012, Kratochvill et al 2015_M1 and M2 genes
TLR6	Toll-like receptor 6	10333	M1	31	Stewart DA et al 2012, Kratochvill et al 2015_M1 and M2 genes
TLR7	Toll-like receptor 7	51284	M1	31	Stewart DA et al 2012, Kratochvill et al 2015_M1 and M2 genes
TLR8	Toll-like receptor 8	51311	M1	32	Stewart DA et al 2012, Kratochvill et al 2015_M1 and M2 genes
TLR9	Toll-like receptor 9	54106	M1	31	Stewart DA et al 2012, Kratochvill et al 2015_M1 and M2 genes

## Sheet: Transcription factors, enzymes
Symbol	Gene Name	Entrez ID	Reported Expression	Reference	Source
Wnt-5b	Wingless-type MMTV integration site family, member 5B	81029	M2	1	Stewart DA et al 2012, Kratochvill et al 2015_M1 and M2 genes
CDH1	Cadherin 1, type 1, E-cadherin (epithelial)	999	M2	-3
MS4A4A	Membrane-spanning 4-domains, subfamily A-member 4, CD20L1	51338	M2	-2
CLEC7A	C-type lectin domain family 7, member A; Dectin 1	64581	M2	-2
PPAR-D	Peroxisome proliferator-activated receptor delta, nuclear hormone receptor 1	5467	M2	-3
ARG1	Arginase, liver	383	M2	-4
IDO1
NFKB1
STAT3	Signal transducer and activator of transcription 3 (acute-phase response factor)	6774	M2	-18
STAT6	Signal transducer and activator of transcription 6, interleukin-4 induced	6778	M2	-3
APOBEC3A
GBP2
IRF1	Interferon regulatory factor 1	3659	M1	-2
IRF4	Interferon regulatory factor 4	3662	M2	-23
IRF5
IRF7	Interferon regulatory factor 7	3665	M1	-2
IRF8	Interferon regulatory factor 8	3394	M1	-24
ISG15
OAS2	2'-5'-oligoadenylate synthetase 2, 69/71kDa	4939	M1	-2
OASL	2'-5'-oligoadenylate synthetase-like	8638	M1	-2
PTGS2	COX2, Prostaglandin-endoperoxide synthase 2	5743	M1	-2
BCL2
ADAM8	A disintegrin and metalloproteinase domain 8	101	M2	-1
MMP14
TRIB1			M2

## Sheet: DC
Symbol
CCR7
SEMA7A
LFA1
CLEC2
DOCK8
CDC42
EZH
L1
CMKLR1
CD74
EPS8
IXb
ASB2α
EPAC1
RAP1
IP3 receptor 1
ARP2
ARP3
CD37
CD82
CD2AP
